# Supplementary material
Source: publisher figshare collection journal article supplement (https://acs.figshare.com/ndownloader/files/8905984)
Supplement: Supplementary file 1 [file 8905984]

data_083aim16
_audit_creation_date              2017-05-17
_audit_creation_method
;
Olex2 1.2
(compiled 2017.03.28 svn.r3405 for OlexSys, GUI svn.r5337)
;
_shelx_SHELXL_version_number      '2014/7'
loop_
  _publ_author_name
  _publ_author_email
  _publ_author_address
 'Coxon, T.' ''
;
Chemistry Research Laboratory, University of Oxford, Mansfield Road
Oxford
OX1 3TA
UK
;
 'Fernandez, M.' ''
;
Chemistry Research Laboratory, University of Oxford, Mansfield Road
Oxford
OX1 3TA
UK
;
 'Barwick-Silk, J.' ''
;
Chemistry Research Laboratory, University of Oxford, Mansfield Road
Oxford
OX1 3TA
UK
;
 'Britton, L.' ''
;
Chemistry Research Laboratory, University of Oxford, Mansfield Road
Oxford
OX1 3TA
UK
;
 'McKay, A.I.' ''
;
Chemistry Research Laboratory, University of Oxford, Mansfield Road
Oxford
OX1 3TA
UK
;
 'Weller, A.S.' ''
;
Chemistry Research Laboratory, University of Oxford, Mansfield Road
Oxford
OX1 3TA
UK
;
 'Willis, M.C.' michael.willis@chem.ox.ac.uk
;
Chemistry Research Laboratory, University of Oxford, Mansfield Road
Oxford
OX1 3TA
UK
;

_publ_contact_author_address
;
Chemistry Research Laboratory, University of Oxford, Mansfield Road
Oxford
OX1 3TA
UK
;
_publ_contact_author_email        michael.willis@chem.ox.ac.uk
_publ_contact_author_id_orcid     ''
_publ_contact_author_name         'Willis, M.C.'
_publ_contact_author_phone        ''
_publ_section_references
;
Dolomanov, O.V., Bourhis, L.J., Gildea, R.J, Howard, J.A.K. & Puschmann, H.
 (2009), J. Appl. Cryst. 42, 339-341.

Sheldrick, G.M. (2015). Acta Cryst. A71, 3-8.

Sheldrick, G.M. (2015). Acta Cryst. C71, 3-8.
;
_chemical_name_common             ?
_chemical_name_systematic         ?
_chemical_formula_moiety          'C50 H49 N O4 P2 Rh, C32 H12 B F24'
_chemical_formula_sum             'C82 H61 B F24 N O4 P2 Rh'
_chemical_formula_weight          1755.97
_chemical_melting_point           ?
_chemical_oxdiff_formula          'Rh1 P2 O4 B1 N1 C82 F24 H61'
_chemical_oxdiff_usercomment      ' '
loop_
  _atom_type_symbol
  _atom_type_description
  _atom_type_scat_dispersion_real
  _atom_type_scat_dispersion_imag
  _atom_type_scat_source
 'C' 'C' 0.0181 0.0091 'International Tables Vol C Tables 4.2.6.8 and 6.1.1.4'
 'H' 'H' 0.0000 0.0000 'International Tables Vol C Tables 4.2.6.8 and 6.1.1.4'
 'B' 'B' 0.0090 0.0039 'International Tables Vol C Tables 4.2.6.8 and 6.1.1.4'
 'F' 'F' 0.0727 0.0534 'International Tables Vol C Tables 4.2.6.8 and 6.1.1.4'
 'N' 'N' 0.0311 0.0180 'International Tables Vol C Tables 4.2.6.8 and 6.1.1.4'
 'O' 'O' 0.0492 0.0322 'International Tables Vol C Tables 4.2.6.8 and 6.1.1.4'
 'P' 'P' 0.2955 0.4335 'International Tables Vol C Tables 4.2.6.8 and 6.1.1.4'
 'Rh' 'Rh' 0.0927 3.6045 'International Tables Vol C Tables 4.2.6.8 and 6.1.1.4'

_shelx_space_group_comment
;
The symmetry employed for this shelxl refinement is uniquely defined
by the following loop, which should always be used as a source of
symmetry information in preference to the above space-group names.
They are only intended as comments.
;
_space_group_crystal_system       'triclinic'
_space_group_IT_number            2
_space_group_name_H-M_alt         'P -1'
_space_group_name_Hall            '-P 1'
loop_
  _space_group_symop_operation_xyz
 'x, y, z'
 '-x, -y, -z'

_cell_length_a                    12.8242(2)
_cell_length_b                    16.9411(3)
_cell_length_c                    19.1569(3)
_cell_angle_alpha                 76.4510(10)
_cell_angle_beta                  83.4360(10)
_cell_angle_gamma                 69.5140(10)
_cell_volume                      3787.85(11)
_cell_formula_units_Z             2
_cell_measurement_reflns_used     51199
_cell_measurement_temperature     150.01(10)
_cell_measurement_theta_max       76.3180
_cell_measurement_theta_min       3.7690
_shelx_estimated_absorpt_T_max    ?
_shelx_estimated_absorpt_T_min    ?
_exptl_absorpt_coefficient_mu     3.213
_exptl_absorpt_correction_T_max   1.00000
_exptl_absorpt_correction_T_min   0.65190
_exptl_absorpt_correction_type    multi-scan
_exptl_absorpt_process_details
;
CrysAlisPro 1.171.38.43b (Rigaku Oxford Diffraction, 2015)
Empirical absorption correction using spherical harmonics,
 implemented in SCALE3 ABSPACK scaling algorithm.
;
_exptl_absorpt_special_details    ?
_exptl_crystal_colour             'light yellow'
_exptl_crystal_colour_modifier    light
_exptl_crystal_colour_primary     yellow
_exptl_crystal_density_diffrn     1.540
_exptl_crystal_density_meas       ?
_exptl_crystal_density_method     ?
_exptl_crystal_description        block
_exptl_crystal_F_000              1776
_exptl_crystal_size_max           0.32
_exptl_crystal_size_mid           0.22
_exptl_crystal_size_min           0.18
_exptl_transmission_factor_max    ?
_exptl_transmission_factor_min    ?
_diffrn_reflns_av_R_equivalents   0.0261
_diffrn_reflns_av_unetI/netI      0.0149
_diffrn_reflns_Laue_measured_fraction_full 1.000
_diffrn_reflns_Laue_measured_fraction_max 0.992
_diffrn_reflns_limit_h_max        16
_diffrn_reflns_limit_h_min        -16
_diffrn_reflns_limit_k_max        21
_diffrn_reflns_limit_k_min        -21
_diffrn_reflns_limit_l_max        24
_diffrn_reflns_limit_l_min        -24
_diffrn_reflns_number             89642
_diffrn_reflns_point_group_measured_fraction_full 1.000
_diffrn_reflns_point_group_measured_fraction_max 0.992
_diffrn_reflns_theta_full         67.684
_diffrn_reflns_theta_max          76.371
_diffrn_reflns_theta_min          3.682
_diffrn_ambient_environment       N~2~
_diffrn_ambient_temperature       150.01(10)
_diffrn_detector                  'CCD plate'
_diffrn_detector_area_resol_mean  10.5035
_diffrn_detector_type             Atlas
_diffrn_measured_fraction_theta_full 1.000
_diffrn_measured_fraction_theta_max 0.992
_diffrn_measurement_details
;
List of Runs (angles in degrees, time in seconds):

  # Type    Start    End  Width  t~exp~   \w     \q     \k     \f   Frames
--------------------------------------------------------------------------
  1  \w    -48.00  23.00   1.00    1.00    --  -41.65  37.00  90.00   71
  2  \w    -48.00   9.00   1.00    1.00    --  -41.65  37.00  30.00   57
  3  \w    -30.00  17.00   1.00    1.00    --  -41.65  37.00-120.00   47
  4  \w    -91.00  -2.00   1.00    1.00    --  -41.65 125.00  90.00   89
  5  \w   -102.00 -26.00   1.00    1.00    --  -41.65 -37.00-120.00   76
  6  \w     53.00  94.00   1.00    1.00    --   41.65-125.00 -30.00   41
  7  \w     79.00 120.00   1.00    4.00    --  111.00-125.00 -30.00   41
  8  \w     95.00 121.00   1.00    4.00    --  111.00-125.00   0.00   26
  9  \w     91.00 141.00   1.00    4.00    --  111.00 -77.00 -30.00   50
 10  \w     94.00 155.00   1.00    4.00    --  111.00 -15.00   0.00   61
 11  \w     87.00 138.00   1.00    4.00    --  111.00 -77.00 120.00   51
 12  \w     94.00 121.00   1.00    4.00    --  111.00-125.00 120.00   27
 13  \w     78.00 103.00   1.00    4.00    --  111.00 -94.00   0.00   25
 14  \w     76.00 109.00   1.00    4.00    --  111.00 -94.00 -60.00   33
 15  \w     86.00 118.00   1.00    4.00    --  111.00-125.00 -90.00   32
 16  \w     74.00 120.00   1.00    4.00    --  111.00-125.00-180.00   46
 17  \w     57.00  86.00   1.00    4.00    --  111.00 -45.00-150.00   29
 18  \w     49.00 134.00   1.00    4.00    --  111.00 -61.00 -90.00   85
 19  \w     72.00 173.00   1.00    4.00    --  111.00  15.00 -90.00  101
 20  \w    105.00 158.00   1.00    4.00    --  111.00  30.00-180.00   53
 21  \w     56.00  82.00   1.00    4.00    --  111.00-125.00   0.00   26
 22  \w     44.00  70.00   1.00    4.00    --  111.00-125.00 -30.00   26
 23  \w     40.00  97.00   1.00    4.00    --  111.00-125.00 -60.00   57
 24  \w     40.00  71.00   1.00    4.00    --  111.00 -45.00  60.00   31
 25  \w     45.00  97.00   1.00    4.00    --  111.00 -45.00  90.00   52
 26  \w     65.00  90.00   1.00    4.00    --  111.00 -45.00 120.00   25
 27  \w     67.00  98.00   1.00    4.00    --  111.00 -45.00 150.00   31
 28  \w     57.00  87.00   1.00    4.00    --  111.00 -94.00 120.00   30
 29  \w     56.00 121.00   1.00    4.00    --  111.00-125.00  90.00   65
 30  \w     48.00  76.00   1.00    4.00    --  111.00 -45.00  30.00   28
 31  \w     41.00  80.00   1.00    4.00    --  111.00 -45.00   0.00   39
 32  \w     41.00  84.00   1.00    4.00    --  111.00 -30.00 -60.00   43
 33  \w     33.00  87.00   1.00    4.00    --  111.00 -15.00   0.00   54
 34  \w     42.00  90.00   1.00    4.00    --  111.00 -30.00 120.00   48
 35  \w     33.00  59.00   1.00    4.00    --  111.00 -94.00   0.00   26
 36  \w     32.00 154.00   1.00    4.00    --  111.00 -15.00-120.00  122
 37  \w     10.00  60.00   1.00    1.00    --   41.65  77.00-180.00   50
 38  \w     -8.00  17.00   1.00    1.00    --   34.00 102.00 -85.63   25
 39  \w      2.00  27.00   1.00    1.00    --   38.00  90.00  70.37   25
 40  \w   -114.00 -80.00   1.00    1.00    --  -41.65 -37.00  60.00   34
 41  \w    -49.00  10.00   1.00    1.00    --  -41.65  37.00 -30.00   59
 42  \w   -114.00 -53.00   1.00    1.00    --  -41.65 -37.00 -30.00   61
 43  \w    -64.00 -19.00   1.00    1.00    --  -41.65 -37.00  60.00   45
 44  \w    -48.00 -21.00   1.00    1.00    --  -41.65 -37.00 -30.00   27
 45  \w     17.00  42.00   1.00    1.00    --   50.00  82.00 -23.76   25
 46  \w     19.00  44.00   1.00    1.00    --   50.00  81.00 -70.60   25
 47  \w     22.00  47.00   1.00    1.00    --   54.00  78.00-127.76   25
 48  \w     22.00  47.00   1.00    1.00    --   54.00  78.00  35.82   25
 49  \w     22.00  47.00   1.00    1.00    --   54.00  78.00  92.44   25
 50  \w     22.00  48.00   1.00    1.00    --   54.00  78.00 137.51   26
 51  \w     35.00  66.00   1.00    1.00    --   66.00  75.00 112.71   31
 52  \w     35.00  61.00   1.00    1.00    --   66.00  75.00 -31.83   26
 53  \w     39.00  68.00   1.00    1.00    --   70.00  77.00-135.57   29
 54  \w    118.00 143.00   1.00    1.00    --   70.00  76.00  -7.85   25
 55  \w     39.00  65.00   1.00    1.00    --   70.00  76.00  -7.85   26
 56  \w     40.00  66.00   1.00    1.00    --   70.00  77.00 137.70   26
 57  \w     39.00  65.00   1.00    1.00    --   70.00  77.00-101.05   26
 58  \w     39.00  72.00   1.00    1.00    --   70.00  75.00 -69.99   33
 59  \w     39.00 103.00   1.00    1.00    --   70.00  76.00 172.22   64
 60  \w     39.00  65.00   1.00    1.00    --   70.00  77.00  25.97   26
 61  \w     92.00 124.00   1.00    1.00    --   70.00  75.00  61.09   32
 62  \w     39.00  82.00   1.00    1.00    --   70.00  75.00  61.09   43
 63  \w     80.00 106.00   1.00    4.00    --  111.00  77.00  60.00   26
 64  \w     80.00 107.00   1.00    4.00    --  111.00  77.00 150.00   27
 65  \w    132.00 158.00   1.00    4.00    --  111.00  77.00 -60.00   26
 66  \w     80.00 113.00   1.00    4.00    --  111.00  77.00-180.00   33
 67  \w    117.00 143.00   1.00    4.00    --  111.00  77.00  60.00   26
 68  \w     80.00 106.00   1.00    4.00    --  111.00  77.00 -90.00   26
 69  \w    121.00 147.00   1.00    4.00    --  111.00  77.00  30.00   26
 70  \w     84.00 115.00   1.00    4.00    --  111.00  61.00 150.00   31
 71  \w     80.00 120.00   1.00    4.00    --  111.00  77.00  30.00   40
 72  \w     80.00 129.00   1.00    4.00    --  111.00  77.00 -60.00   49
 73  \w     80.00 118.00   1.00    4.00    --  111.00  77.00-120.00   38
 74  \w     83.00 126.00   1.00    4.00    --  111.00  61.00 -60.00   43
 75  \w     81.00 106.00   1.00    4.00    --  111.00  77.00 120.00   25
 76  \w     84.00 149.00   1.00    4.00    --  111.00  61.00 120.00   65
 77  \w     85.00 168.00   1.00    4.00    --  111.00  61.00 -30.00   83
 78  \w    119.00 145.00   1.00    4.00    --  111.00  77.00  90.00   26
 79  \w     80.00 110.00   1.00    4.00    --  111.00  77.00  90.00   30
 80  \w     83.00 165.00   1.00    4.00    --  111.00  61.00  60.00   82
 81  \w    119.00 145.00   1.00    4.00    --  111.00  61.00  90.00   26
 82  \w     83.00 111.00   1.00    4.00    --  111.00  61.00  90.00   28
 83  \w     80.00 106.00   1.00    4.00    --  111.00  77.00 -30.00   26
 84  \w     84.00 134.00   1.00    4.00    --  111.00  61.00  30.00   50
 85  \w     83.00 109.00   1.00    4.00    --  111.00  61.00-120.00   26
 86  \w     81.00 107.00   1.00    4.00    --  111.00  70.00-146.00   26
 87  \w     83.00 146.00   1.00    4.00    --  111.00  61.00 -90.00   63
 88  \w     83.00 177.00   1.00    4.00    --  111.00  61.00   0.00   94
 89  \w     80.00 126.00   1.00    4.00    --  111.00  77.00   0.00   46
 90  \w     83.00 121.00   1.00    4.00    --  111.00  61.00-180.00   38
;
_diffrn_measurement_device        'four-circle diffractometer'
_diffrn_measurement_device_type   'SuperNova, Dual, Cu at zero, Atlas'
_diffrn_measurement_method        '\w scans'
_diffrn_orient_matrix_type
'CrysAlisPro convention (1999,Acta A55,543-557)'
_diffrn_orient_matrix_UB_11       0.0921741000
_diffrn_orient_matrix_UB_12       -0.0452697000
_diffrn_orient_matrix_UB_13       0.0551593000
_diffrn_orient_matrix_UB_21       0.0598528000
_diffrn_orient_matrix_UB_22       0.0648666000
_diffrn_orient_matrix_UB_23       -0.0349614000
_diffrn_orient_matrix_UB_31       -0.0662396000
_diffrn_orient_matrix_UB_32       0.0599668000
_diffrn_orient_matrix_UB_33       0.0508571000
_diffrn_radiation_monochromator   mirror
_diffrn_radiation_probe           x-ray
_diffrn_radiation_type            CuK\a
_diffrn_radiation_wavelength      1.54184
_diffrn_source                    'micro-focus sealed X-ray tube'
_diffrn_source_type               'SuperNova (Cu) X-ray Source'
_reflns_Friedel_coverage          0.000
_reflns_Friedel_fraction_full     .
_reflns_Friedel_fraction_max      .
_reflns_number_gt                 15179
_reflns_number_total              15768
_reflns_odcompleteness_completeness 99.92
_reflns_odcompleteness_iscentric  1
_reflns_odcompleteness_theta      74.33
_reflns_special_details
;
 Reflections were merged by SHELXL according to the crystal
 class for the calculation of statistics and refinement.
 
 _reflns_Friedel_fraction is defined as the number of unique
 Friedel pairs measured divided by the number that would be
 possible theoretically, ignoring centric projections and
 systematic absences.
;
_reflns_threshold_expression      'I > 2\s(I)'
_computing_cell_refinement        'CrysAlisPro 1.171.38.43b (Rigaku OD, 2015)'
_computing_data_collection        'CrysAlisPro 1.171.38.43b (Rigaku OD, 2015)'
_computing_data_reduction         'CrysAlisPro 1.171.38.43b (Rigaku OD, 2015)'
_computing_molecular_graphics     'Olex2 (Dolomanov et al., 2009)'
_computing_publication_material   'Olex2 (Dolomanov et al., 2009)'
_computing_structure_refinement   'ShelXL (Sheldrick, 2015)'
_computing_structure_solution     'ShelXT (Sheldrick, 2015)'
_refine_diff_density_max          0.534
_refine_diff_density_min          -0.476
_refine_diff_density_rms          0.047
_refine_ls_extinction_coef        .
_refine_ls_extinction_method      none
_refine_ls_goodness_of_fit_ref    1.017
_refine_ls_hydrogen_treatment     mixed
_refine_ls_matrix_type            full
_refine_ls_number_parameters      1228
_refine_ls_number_reflns          15768
_refine_ls_number_restraints      723
_refine_ls_R_factor_all           0.0284
_refine_ls_R_factor_gt            0.0272
_refine_ls_restrained_S_all       1.113
_refine_ls_shift/su_max           0.004
_refine_ls_shift/su_mean          0.000
_refine_ls_structure_factor_coef  Fsqd
_refine_ls_weighting_details
'w=1/[\s^2^(Fo^2^)+(0.0373P)^2^+2.1776P] where P=(Fo^2^+2Fc^2^)/3'
_refine_ls_weighting_scheme       calc
_refine_ls_wR_factor_gt           0.0701
_refine_ls_wR_factor_ref          0.0713
_refine_special_details           ?
_olex2_refinement_description
;
1. Fixed Uiso
 At 1.2 times of:
  All C(H) groups, All C(H,H) groups, All C(H,H,H,H) groups
 At 1.5 times of:
  All C(H,H,H) groups
2. Restrained distances
 F15-F13 \\sim F15-F14 \\sim F13-F14 \\sim F15A-F14A \\sim F15A-F13A \\sim
F14A-F13A
 with sigma of 0.04
 C73-F15 \\sim C73-F13 \\sim C73-F14 \\sim C73-F15A \\sim C73-F14A \\sim
C73-F13A
 with sigma of 0.02
 F10-F11 \\sim F10-F12 \\sim F11-F12 \\sim F10A-F11A \\sim F10A-F12A \\sim
F11A-F12A
 with sigma of 0.04
 C66-F10 \\sim C66-F11 \\sim C66-F12 \\sim C66-F10A \\sim C66-F11A \\sim
C66-F12A
 with sigma of 0.02
 F2-F3 \\sim F2-F1 \\sim F3-F1 \\sim F1A-F2A \\sim F1A-F3A \\sim F2A-F3A
 with sigma of 0.04
 C57-F2 \\sim C57-F3 \\sim C57-F1 \\sim C57-F1A \\sim C57-F2A \\sim C57-F3A
 with sigma of 0.02
 F24-F23 \\sim F24-F22 \\sim F23-F22 \\sim F22A-F24A \\sim F22A-F23A \\sim
F24A-F23A
 with sigma of 0.04
 C82-F24 \\sim C82-F23 \\sim C82-F22 \\sim C82-C79 \\sim C82-F22A \\sim
C82-F24A \\sim C82-F23A
 with sigma of 0.02
 C45-C44A \\sim C45-C44
 with sigma of 0.02
 C44-C43 \\sim C44A-C43A
 with sigma of 0.02
 C35A-C34A \\sim C36A-C35A \\sim C36-C35 \\sim C35-C34 \\sim C38-C37 \\sim
C39A-C38A \\sim C39-C38 ~
 C38A-C37A \\sim C39-C34 \\sim C39A-C34A \\sim C37-C36 \\sim C37A-C36A
 with sigma of 0.02
 P2-C34 \\sim P2-C34A
 with sigma of 0.02
3. Uiso/Uaniso restraints and constraints
C73 \\sim F13 \\sim F15 \\sim F14: within 2A with sigma of 0.04 and sigma for
terminal atoms of 0.08
C73 \\sim F14A \\sim F13A \\sim F15A: within 2A with sigma of 0.01 and sigma
for terminal atoms of 0.02
C66 \\sim F10A \\sim F11A \\sim F12A: within 2A with sigma of 0.04 and sigma
for terminal atoms of 0.08
C66 \\sim F10 \\sim F11 \\sim F12: within 2A with sigma of 0.04 and sigma for
terminal atoms of 0.08
C57 \\sim F3A \\sim F1A \\sim F2A: within 2A with sigma of 0.04 and sigma for
terminal atoms of 0.08
C57 \\sim F1 \\sim F2 \\sim F3: within 2A with sigma of 0.01 and sigma for
terminal atoms of 0.02
C82 \\sim F22A \\sim F23A \\sim F24A: within 2A with sigma of 0.04 and sigma
for terminal atoms of 0.08
C82 \\sim F22 \\sim F23 \\sim F24: within 2A with sigma of 0.04 and sigma for
terminal atoms of 0.08
C42 \\sim C43 \\sim C44 \\sim C45: within 2A with sigma of 0.04 and sigma for
terminal atoms of 0.08
C42 \\sim C43A \\sim C44A \\sim C45: within 2A with sigma of 0.04 and sigma for
terminal atoms of 0.08
P2 \\sim C34 \\sim C35 \\sim C36 \\sim C37 \\sim C38 \\sim C39: within 2A with
sigma of 0.04 and sigma for terminal atoms of 0.08
P2 \\sim C34A \\sim C35A \\sim C36A \\sim C37A \\sim C38A \\sim C39A: within 2A
with sigma of 0.04 and sigma for terminal atoms of 0.08
4. Rigid body (RIGU) restrains
 C73, F13, F15, F14
 with sigma for 1-2 distances of 0.004 and sigma for 1-3 distances of 0.004
 C73, F14A, F13A, F15A
 with sigma for 1-2 distances of 0.004 and sigma for 1-3 distances of 0.004
 C66, F10A, F11A, F12A
 with sigma for 1-2 distances of 0.004 and sigma for 1-3 distances of 0.004
 C66, F10, F11, F12
 with sigma for 1-2 distances of 0.004 and sigma for 1-3 distances of 0.004
 C57, F3A, F1A, F2A
 with sigma for 1-2 distances of 0.004 and sigma for 1-3 distances of 0.004
 C57, F1, F2, F3
 with sigma for 1-2 distances of 0.004 and sigma for 1-3 distances of 0.004
 C82, F22A, F23A, F24A
 with sigma for 1-2 distances of 0.004 and sigma for 1-3 distances of 0.004
 C82, F22, F23, F24
 with sigma for 1-2 distances of 0.004 and sigma for 1-3 distances of 0.004
 C42, C43, C44, C45
 with sigma for 1-2 distances of 0.004 and sigma for 1-3 distances of 0.004
 C42, C43A, C44A, C45
 with sigma for 1-2 distances of 0.004 and sigma for 1-3 distances of 0.004
 P2, C34, C35, C36, C37, C38, C39
 with sigma for 1-2 distances of 0.004 and sigma for 1-3 distances of 0.004
 P2, C34A, C35A, C36A, C37A, C38A, C39A
 with sigma for 1-2 distances of 0.004 and sigma for 1-3 distances of 0.004
5. Others
 Sof(F15A)=Sof(F14A)=Sof(F13A)=1-FVAR(1)
 Sof(F15)=Sof(F13)=Sof(F14)=FVAR(1)
 Sof(F10A)=Sof(F11A)=Sof(F12A)=1-FVAR(2)
 Sof(F10)=Sof(F11)=Sof(F12)=FVAR(2)
 Sof(F1A)=Sof(F2A)=Sof(F3A)=1-FVAR(3)
 Sof(F2)=Sof(F3)=Sof(F1)=FVAR(3)
 Sof(F22A)=Sof(F24A)=Sof(F23A)=1-FVAR(4)
 Sof(F24)=Sof(F23)=Sof(F22)=FVAR(4)
 Sof(H45C)=Sof(H45D)=Sof(H42C)=Sof(H42D)=Sof(C43A)=Sof(H43C)=Sof(H43D)=
 Sof(C44A)=Sof(H44C)=Sof(H44D)=1-FVAR(5)
 Sof(H45A)=Sof(H45B)=Sof(H42A)=Sof(H42B)=Sof(C44)=Sof(H44A)=Sof(H44B)=Sof(C43)=
 Sof(H43A)=Sof(H43B)=FVAR(5)
 Sof(C37A)=Sof(H37A)=Sof(C36A)=Sof(H36A)=Sof(C39A)=Sof(H39A)=Sof(C35A)=
 Sof(H35A)=Sof(C38A)=Sof(H38A)=Sof(C34A)=1-FVAR(6)
 Sof(C34)=Sof(C39)=Sof(H39)=Sof(C35)=Sof(H35)=Sof(C36)=Sof(H36)=Sof(C38)=
 Sof(H38)=Sof(C37)=Sof(H37)=FVAR(6)
6.a Secondary CH2 refined with riding coordinates:
 C47(H47A,H47B), C45(H45A,H45B), C45(H45C,H45D), C42(H42A,H42B), C42(H42C,
 H42D), C48(H48A,H48B), C50(H50A,H50B), C44(H44A,H44B), C49(H49A,H49B),
 C43(H43A,H43B), C43A(H43C,H43D), C44A(H44C,H44D)
6.b Aromatic/amide H refined with riding coordinates:
 C56(H56), C54(H54), C14(H14), C52(H52), C15(H15), C78(H78), C60(H60),
 C80(H80), C16(H16), C64(H64), C2(H2), C68(H68), C29(H29), C76(H76), C32(H32),
 C31(H31), C72(H72), C6(H6), C30(H30), C9(H9), C10(H10), C62(H62), C11(H11),
 C70(H70), C12(H12), C8(H8), C33(H33), C23(H23), C3(H3), C25(H25), C4(H4),
 C39(H39), C5(H5), C24(H24), C35(H35), C36(H36), C38(H38), C37(H37), C37A(H37A),
  C36A(H36A), C39A(H39A), C35A(H35A), C38A(H38A)
6.c Idealised Me refined as rotating group:
 C21(H21A,H21B,H21C), C20(H20A,H20B,H20C)
;
_atom_sites_solution_hydrogens    mixed
_atom_sites_solution_primary      dual
_atom_sites_solution_secondary    ?
loop_
  _atom_site_label
  _atom_site_type_symbol
  _atom_site_fract_x
  _atom_site_fract_y
  _atom_site_fract_z
  _atom_site_U_iso_or_equiv
  _atom_site_adp_type
  _atom_site_occupancy
  _atom_site_site_symmetry_order
  _atom_site_calc_flag
  _atom_site_refinement_flags_posn
  _atom_site_refinement_flags_adp
  _atom_site_refinement_flags_occupancy
  _atom_site_disorder_assembly
  _atom_site_disorder_group
 Rh1 Rh 0.45625(2) 0.79554(2) 0.63946(2) 0.02064(4) Uani 1 1 d . . . . .
 P1 P 0.63309(3) 0.74865(2) 0.67908(2) 0.02343(8) Uani 1 1 d . . . . .
 P2 P 0.30519(3) 0.80191(2) 0.58421(2) 0.02587(8) Uani 1 1 d D U . . .
 F17 F 0.81615(10) 0.92864(8) -0.05099(6) 0.0464(3) Uani 1 1 d . . . . .
 O3 O 0.37784(9) 0.78565(7) 0.74552(6) 0.0264(2) Uani 1 1 d . . . . .
 O1 O 0.50397(8) 0.65286(7) 0.63643(5) 0.0227(2) Uani 1 1 d . . . . .
 F5 F 1.11410(10) 0.49784(9) 0.39990(6) 0.0555(3) Uani 1 1 d . . . . .
 F6 F 1.04736(10) 0.56783(9) 0.48357(6) 0.0545(3) Uani 1 1 d . . . . .
 F16 F 0.97543(12) 0.94429(9) -0.06023(7) 0.0596(4) Uani 1 1 d . . . . .
 F8 F 0.53516(12) 0.60527(10) 0.01957(7) 0.0601(3) Uani 1 1 d . . . . .
 F9 F 0.41169(11) 0.62413(11) 0.10375(8) 0.0625(4) Uani 1 1 d . . . . .
 F4 F 1.11217(10) 0.62741(10) 0.38474(8) 0.0625(4) Uani 1 1 d . . . . .
 F18 F 0.95944(13) 0.82908(8) -0.07746(6) 0.0593(4) Uani 1 1 d . . . . .
 F7 F 0.57080(15) 0.52661(10) 0.12473(11) 0.0846(6) Uani 1 1 d . . . . .
 O2 O 0.42303(13) 0.97439(8) 0.59732(7) 0.0464(3) Uani 1 1 d . . . . .
 F24 F 0.9905(3) 0.31811(18) 0.26566(12) 0.0649(7) Uani 0.867(7) 1 d D U P A 1
 F2 F 0.6371(7) 0.7743(5) 0.4527(4) 0.0706(19) Uani 0.480(13) 1 d D U P B 1
 F20 F 1.19766(14) 0.44852(13) -0.00881(9) 0.0843(5) Uani 1 1 d . . . . .
 F23 F 0.84637(19) 0.35930(14) 0.20381(17) 0.0703(8) Uani 0.867(7) 1 d D U P A
 1
 N1 N 0.27950(13) 0.85807(10) 0.82797(8) 0.0343(3) Uani 1 1 d . . . . .
 F19 F 1.14540(14) 0.58326(13) -0.02240(8) 0.0824(5) Uani 1 1 d . . . . .
 O4 O 0.25181(15) 0.83390(13) 0.97935(8) 0.0608(4) Uani 1 1 d . . . . .
 F22 F 1.0010(3) 0.28663(12) 0.16260(13) 0.0844(10) Uani 0.867(7) 1 d D U P A
 1
 C56 C 0.93633(13) 0.61565(10) 0.30620(8) 0.0276(3) Uani 1 1 d . . . . .
 H56 H 1.0020 0.5923 0.2808 0.033 Uiso 1 1 calc R . . . .
 F21 F 1.26019(11) 0.50450(16) 0.05808(8) 0.0957(7) Uani 1 1 d . . . . .
 C54 C 0.84417(14) 0.63908(11) 0.42034(8) 0.0293(3) Uani 1 1 d . . . . .
 H54 H 0.8465 0.6345 0.4695 0.035 Uiso 1 1 calc R . . . .
 C14 C 0.74728(13) 0.57753(11) 0.74773(9) 0.0311(3) Uani 1 1 d . . . . .
 H14 H 0.7928 0.6000 0.7655 0.037 Uiso 1 1 calc R . . . .
 C17 C 0.61345(13) 0.50759(10) 0.69257(8) 0.0257(3) Uani 1 1 d . . . . .
 C27 C 0.41668(12) 0.62468(10) 0.62844(8) 0.0257(3) Uani 1 1 d . . . . .
 C52 C 0.74052(12) 0.68502(9) 0.31138(8) 0.0237(3) Uani 1 1 d . . . . .
 H52 H 0.6722 0.7113 0.2895 0.028 Uiso 1 1 calc R . . . .
 C13 C 0.66119(12) 0.63256(10) 0.70243(8) 0.0250(3) Uani 1 1 d . . . . .
 F15 F 1.1911(6) 0.7815(5) 0.2106(6) 0.089(2) Uani 0.518(10) 1 d D U P C 1
 C59 C 0.71553(13) 0.70122(10) 0.15022(8) 0.0254(3) Uani 1 1 d . . . . .
 C75 C 0.92373(12) 0.58533(10) 0.15544(8) 0.0249(3) Uani 1 1 d . . . . .
 C41 C 0.34939(13) 0.93761(10) 0.71619(8) 0.0266(3) Uani 1 1 d . . . . .
 C18 C 0.59393(12) 0.59578(10) 0.67776(8) 0.0228(3) Uani 1 1 d . . . . .
 C51 C 0.83710(13) 0.65576(9) 0.26898(8) 0.0239(3) Uani 1 1 d . . . . .
 C79 C 0.97708(15) 0.43004(11) 0.16483(9) 0.0345(4) Uani 1 1 d D . . . .
 C19 C 0.54627(13) 0.47072(10) 0.65643(8) 0.0273(3) Uani 1 1 d . . . . .
 C40 C 0.41049(13) 0.91641(10) 0.64352(8) 0.0278(3) Uani 1 1 d . . . . .
 C15 C 0.76499(14) 0.49046(11) 0.76607(9) 0.0331(3) Uani 1 1 d . . . . .
 H15 H 0.8210 0.4547 0.7973 0.040 Uiso 1 1 calc R . . . .
 C78 C 1.06068(15) 0.43037(12) 0.11217(10) 0.0388(4) Uani 1 1 d . . . . .
 H78 H 1.1051 0.3798 0.0979 0.047 Uiso 1 1 calc R . . . .
 C46 C 0.33602(13) 0.85664(10) 0.76497(8) 0.0264(3) Uani 1 1 d . . . . .
 C53 C 0.74417(13) 0.67576(10) 0.38546(8) 0.0260(3) Uani 1 1 d . . . . .
 C7 C 0.66015(13) 0.77429(11) 0.76101(9) 0.0292(3) Uani 1 1 d . . . . .
 C60 C 0.67143(13) 0.64399(11) 0.13255(8) 0.0283(3) Uani 1 1 d . . . . .
 H60 H 0.7157 0.5864 0.1369 0.034 Uiso 1 1 calc R . . . .
 C80 C 0.91197(13) 0.50540(10) 0.18689(8) 0.0283(3) Uani 1 1 d . . . . .
 H80 H 0.8588 0.5026 0.2238 0.034 Uiso 1 1 calc R . . . .
 C16 C 0.69997(14) 0.45577(11) 0.73824(9) 0.0312(3) Uani 1 1 d . . . . .
 H16 H 0.7143 0.3966 0.7503 0.037 Uiso 1 1 calc R . . . .
 C71 C 0.93951(14) 0.84719(10) 0.04192(9) 0.0289(3) Uani 1 1 d . . . . .
 C77 C 1.07595(14) 0.50786(13) 0.08154(9) 0.0358(4) Uani 1 1 d . . . . .
 C22 C 0.43168(14) 0.53734(11) 0.64150(9) 0.0301(3) Uani 1 1 d . . . . .
 C26 C 0.31596(13) 0.68883(11) 0.60624(10) 0.0323(3) Uani 1 1 d . . . . .
 C64 C 0.64422(14) 0.78685(11) 0.14158(8) 0.0298(3) Uani 1 1 d . . . . .
 H64 H 0.6698 0.8274 0.1525 0.036 Uiso 1 1 calc R . . . .
 C1 C 0.73925(13) 0.77022(11) 0.61379(8) 0.0283(3) Uani 1 1 d . . . . .
 C2 C 0.84654(14) 0.71136(13) 0.61075(11) 0.0375(4) Uani 1 1 d . . . . .
 H2 H 0.8664 0.6585 0.6430 0.045 Uiso 1 1 calc R . . . .
 C67 C 0.89490(13) 0.74965(10) 0.14741(8) 0.0252(3) Uani 1 1 d . . . . .
 C68 C 0.96567(14) 0.77051(10) 0.18485(9) 0.0296(3) Uani 1 1 d . . . . .
 H68 H 0.9745 0.7464 0.2336 0.036 Uiso 1 1 calc R . . . .
 F10 F 0.4010(3) 0.9375(2) 0.0551(2) 0.0912(15) Uani 0.737(6) 1 d D U P D 1
 C55 C 0.94049(14) 0.60940(11) 0.37958(8) 0.0293(3) Uani 1 1 d . . . . .
 C61 C 0.56339(14) 0.67028(12) 0.10862(9) 0.0334(3) Uani 1 1 d . . . . .
 C29 C 0.13511(14) 0.83067(11) 0.68823(10) 0.0343(4) Uani 1 1 d . . . . .
 H29 H 0.1797 0.7791 0.7153 0.041 Uiso 1 1 calc R . . . .
 C74 C 0.92312(15) 0.88683(11) -0.03606(9) 0.0341(4) Uani 1 1 d . . . . .
 F3 F 0.6190(7) 0.6517(3) 0.4786(5) 0.090(3) Uani 0.480(13) 1 d D U P B 1
 C28 C 0.16770(13) 0.85925(11) 0.61758(9) 0.0299(3) Uani 1 1 d . . . . .
 C76 C 1.00847(13) 0.58377(11) 0.10216(8) 0.0294(3) Uani 1 1 d . . . . .
 H76 H 1.0201 0.6352 0.0798 0.035 Uiso 1 1 calc R . . . .
 C63 C 0.53654(14) 0.81359(12) 0.11729(9) 0.0345(4) Uani 1 1 d . . . . .
 C32 C 0.00205(16) 0.98478(13) 0.60837(11) 0.0465(5) Uani 1 1 d . . . . .
 H32 H -0.0426 1.0367 0.5818 0.056 Uiso 1 1 calc R . . . .
 F11 F 0.5262(2) 0.96159(13) 0.0999(2) 0.0691(8) Uani 0.737(6) 1 d D U P D 1
 C31 C -0.02955(15) 0.95561(13) 0.67821(12) 0.0443(4) Uani 1 1 d . . . . .
 H31 H -0.0956 0.9878 0.6984 0.053 Uiso 1 1 calc R . . . .
 C57 C 0.63984(15) 0.70841(12) 0.42922(9) 0.0339(3) Uani 1 1 d D U . . .
 C72 C 0.88263(13) 0.79121(10) 0.07502(8) 0.0267(3) Uani 1 1 d . . . . .
 H72 H 0.8346 0.7810 0.0481 0.032 Uiso 1 1 calc R . . . .
 C6 C 0.71092(15) 0.84883(13) 0.56526(10) 0.0386(4) Uani 1 1 d . . . . .
 H6 H 0.6389 0.8879 0.5663 0.046 Uiso 1 1 calc R . . . .
 C69 C 1.02324(15) 0.82605(11) 0.15166(10) 0.0347(4) Uani 1 1 d . . . . .
 C30 C 0.03660(15) 0.87871(13) 0.71843(11) 0.0409(4) Uani 1 1 d . . . . .
 H30 H 0.0151 0.8593 0.7655 0.049 Uiso 1 1 calc R . . . .
 C9 C 0.72841(19) 0.85587(15) 0.82077(11) 0.0482(5) Uani 1 1 d . . . . .
 H9 H 0.7671 0.8936 0.8190 0.058 Uiso 1 1 calc R . . . .
 C10 C 0.68044(18) 0.82584(15) 0.88485(11) 0.0487(5) Uani 1 1 d . . . . .
 H10 H 0.6864 0.8438 0.9261 0.058 Uiso 1 1 calc R . . . .
 C47 C 0.26132(17) 0.77984(13) 0.87134(10) 0.0409(4) Uani 1 1 d . . . . .
 H47A H 0.3009 0.7313 0.8490 0.049 Uiso 1 1 calc R . . . .
 H47B H 0.1826 0.7873 0.8739 0.049 Uiso 1 1 calc R . . . .
 C62 C 0.49483(14) 0.75544(13) 0.10054(9) 0.0368(4) Uani 1 1 d . . . . .
 H62 H 0.4229 0.7730 0.0844 0.044 Uiso 1 1 calc R . . . .
 C11 C 0.62342(17) 0.76907(15) 0.88809(10) 0.0441(4) Uani 1 1 d . . . . .
 H11 H 0.5928 0.7478 0.9317 0.053 Uiso 1 1 calc R . . . .
 C70 C 1.01201(15) 0.86458(11) 0.07959(10) 0.0341(4) Uani 1 1 d . . . . .
 H70 H 1.0517 0.9008 0.0572 0.041 Uiso 1 1 calc R . . . .
 C34 C 0.3093(12) 0.8406(9) 0.4860(4) 0.0300(16) Uani 0.58(2) 1 d D U P E 1
 C12 C 0.61197(15) 0.74393(13) 0.82591(9) 0.0356(4) Uani 1 1 d . . . . .
 H12 H 0.5722 0.7069 0.8278 0.043 Uiso 1 1 calc R . . . .
 C8 C 0.71924(16) 0.82997(13) 0.75869(10) 0.0380(4) Uani 1 1 d . . . . .
 H8 H 0.7525 0.8498 0.7157 0.046 Uiso 1 1 calc R . . . .
 C33 C 0.10063(15) 0.93684(12) 0.57748(10) 0.0390(4) Uani 1 1 d . . . . .
 H33 H 0.1216 0.9565 0.5303 0.047 Uiso 1 1 calc R . . . .
 C45 C 0.23714(14) 1.01238(11) 0.69678(10) 0.0348(4) Uani 1 1 d D U . . .
 H45A H 0.1760 1.0006 0.7270 0.042 Uiso 0.667(10) 1 calc R . P F 1
 H45B H 0.2208 1.0207 0.6468 0.042 Uiso 0.667(10) 1 calc R . P F 1
 H45C H 0.2089 1.0072 0.6538 0.042 Uiso 0.333(10) 1 calc R . P F 2
 H45D H 0.1823 1.0092 0.7357 0.042 Uiso 0.333(10) 1 calc R . P F 2
 C23 C 0.33862(16) 0.51503(13) 0.63563(14) 0.0478(5) Uani 1 1 d . . . . .
 H23 H 0.3455 0.4571 0.6447 0.057 Uiso 1 1 calc R . . . .
 C3 C 0.92371(16) 0.73197(15) 0.55933(12) 0.0474(5) Uani 1 1 d . . . . .
 H3 H 0.9949 0.6922 0.5566 0.057 Uiso 1 1 calc R . . . .
 C58 C 1.05243(16) 0.57517(13) 0.41215(9) 0.0403(4) Uani 1 1 d . . . . .
 B1 B 0.84081(14) 0.67328(11) 0.18085(9) 0.0235(3) Uani 1 1 d . . . . .
 F1 F 0.5489(4) 0.7423(5) 0.3872(3) 0.0631(15) Uani 0.480(13) 1 d D U P B 1
 C82 C 0.95597(19) 0.34872(12) 0.19925(11) 0.0455(5) Uani 1 1 d D U . . .
 C25 C 0.22536(16) 0.66279(13) 0.60172(14) 0.0513(6) Uani 1 1 d . . . . .
 H25 H 0.1567 0.7040 0.5884 0.062 Uiso 1 1 calc R . . . .
 C4 C 0.89595(18) 0.81061(16) 0.51245(12) 0.0507(5) Uani 1 1 d . . . . .
 H4 H 0.9487 0.8243 0.4789 0.061 Uiso 1 1 calc R . . . .
 C21 C 0.60478(15) 0.45507(12) 0.58333(10) 0.0364(4) Uani 1 1 d . . . . .
 H21A H 0.6106 0.5082 0.5547 0.055 Uiso 1 1 calc GR . . . .
 H21B H 0.5622 0.4340 0.5587 0.055 Uiso 1 1 calc GR . . . .
 H21C H 0.6780 0.4133 0.5912 0.055 Uiso 1 1 calc GR . . . .
 C42 C 0.42095(16) 0.97799(11) 0.74791(10) 0.0362(4) Uani 1 1 d . U . . .
 H42A H 0.4091 0.9705 0.7996 0.043 Uiso 0.667(10) 1 calc R . P F 1
 H42B H 0.4995 0.9511 0.7372 0.043 Uiso 0.667(10) 1 calc R . P F 1
 H42C H 0.4886 0.9768 0.7191 0.043 Uiso 0.333(10) 1 calc R . P F 2
 H42D H 0.4401 0.9489 0.7971 0.043 Uiso 0.333(10) 1 calc R . P F 2
 C81 C 1.17026(16) 0.51033(17) 0.02796(11) 0.0497(5) Uani 1 1 d . . . . .
 C39 C 0.3508(8) 0.9074(6) 0.4567(4) 0.0325(14) Uani 0.58(2) 1 d D U P E 1
 H39 H 0.3775 0.9313 0.4868 0.039 Uiso 0.58(2) 1 calc R . P E 1
 C5 C 0.78953(18) 0.86938(16) 0.51517(11) 0.0498(5) Uani 1 1 d . . . . .
 H5 H 0.7707 0.9226 0.4835 0.060 Uiso 1 1 calc R . . . .
 C65 C 0.52129(17) 0.60611(14) 0.08977(11) 0.0447(4) Uani 1 1 d . . . . .
 C48 C 0.30247(19) 0.76219(16) 0.94610(11) 0.0518(5) Uani 1 1 d . . . . .
 H48A H 0.2862 0.7124 0.9752 0.062 Uiso 1 1 calc R . . . .
 H48B H 0.3826 0.7488 0.9436 0.062 Uiso 1 1 calc R . . . .
 F12 F 0.4055(4) 0.92363(17) 0.16786(16) 0.0956(15) Uani 0.737(6) 1 d D U P D
 1
 C50 C 0.22989(17) 0.93204(14) 0.86272(10) 0.0434(4) Uani 1 1 d . . . . .
 H50A H 0.1494 0.9478 0.8653 0.052 Uiso 1 1 calc R . . . .
 H50B H 0.2491 0.9811 0.8350 0.052 Uiso 1 1 calc R . . . .
 C66 C 0.46500(17) 0.90621(14) 0.10948(11) 0.0479(5) Uani 1 1 d D U . . .
 C73 C 1.09969(19) 0.84299(13) 0.19554(12) 0.0494(5) Uani 1 1 d D U . . .
 C24 C 0.23686(17) 0.57631(15) 0.61681(17) 0.0618(7) Uani 1 1 d . . . . .
 H24 H 0.1759 0.5596 0.6142 0.074 Uiso 1 1 calc R . . . .
 C44 C 0.2571(5) 1.0941(3) 0.7112(3) 0.0417(12) Uani 0.667(10) 1 d D U P F 1
 H44A H 0.2255 1.1440 0.6735 0.050 Uiso 0.667(10) 1 calc R . P F 1
 H44B H 0.2222 1.1066 0.7568 0.050 Uiso 0.667(10) 1 calc R . P F 1
 C35 C 0.2706(8) 0.8058(7) 0.4389(5) 0.0412(16) Uani 0.58(2) 1 d D U P E 1
 H35 H 0.2416 0.7616 0.4574 0.049 Uiso 0.58(2) 1 calc R . P E 1
 C20 C 0.53949(19) 0.38504(13) 0.70179(12) 0.0463(5) Uani 1 1 d . . . . .
 H20A H 0.6134 0.3450 0.7111 0.069 Uiso 1 1 calc GR . . . .
 H20B H 0.5007 0.3620 0.6762 0.069 Uiso 1 1 calc GR . . . .
 H20C H 0.5002 0.3944 0.7465 0.069 Uiso 1 1 calc GR . . . .
 C36 C 0.2748(7) 0.8364(8) 0.3644(5) 0.048(2) Uani 0.58(2) 1 d D U P E 1
 H36 H 0.2499 0.8122 0.3337 0.057 Uiso 0.58(2) 1 calc R . P E 1
 C49 C 0.2740(2) 0.90756(17) 0.93764(12) 0.0591(6) Uani 1 1 d . . . . .
 H49A H 0.3537 0.8962 0.9342 0.071 Uiso 1 1 calc R . . . .
 H49B H 0.2399 0.9556 0.9615 0.071 Uiso 1 1 calc R . . . .
 C38 C 0.3528(6) 0.9389(7) 0.3826(3) 0.0449(15) Uani 0.58(2) 1 d D U P E 1
 H38 H 0.3790 0.9846 0.3637 0.054 Uiso 0.58(2) 1 calc R . P E 1
 C37 C 0.3161(6) 0.9025(8) 0.3371(4) 0.0483(18) Uani 0.58(2) 1 d D U P E 1
 H37 H 0.3193 0.9230 0.2877 0.058 Uiso 0.58(2) 1 calc R . P E 1
 C43 C 0.3823(4) 1.07307(19) 0.7123(3) 0.0387(10) Uani 0.667(10) 1 d D U P F 1
 H43A H 0.4147 1.0827 0.6641 0.046 Uiso 0.667(10) 1 calc R . P F 1
 H43B H 0.4008 1.1069 0.7403 0.046 Uiso 0.667(10) 1 calc R . P F 1
 F13 F 1.1173(6) 0.9145(3) 0.1752(3) 0.088(2) Uani 0.518(10) 1 d D U P C 1
 F14 F 1.0517(4) 0.8488(5) 0.2669(2) 0.0893(18) Uani 0.518(10) 1 d D U P C 1
 H H 0.5051(18) 0.8109(14) 0.5679(12) 0.040(6) Uiso 1 1 d . . . . .
 F15A F 1.1643(7) 0.7734(4) 0.2327(5) 0.081(2) Uani 0.482(10) 1 d D U P C 2
 F14A F 1.0532(4) 0.8985(4) 0.2298(4) 0.088(2) Uani 0.482(10) 1 d D U P C 2
 F13A F 1.1766(5) 0.8746(5) 0.1489(2) 0.0835(19) Uani 0.482(10) 1 d D U P C 2
 F10A F 0.3537(5) 0.9059(4) 0.1277(6) 0.092(3) Uani 0.263(6) 1 d D U P D 2
 F11A F 0.4518(10) 0.9373(6) 0.0428(4) 0.084(3) Uani 0.263(6) 1 d D U P D 2
 F12A F 0.4817(9) 0.9431(6) 0.1480(7) 0.099(4) Uani 0.263(6) 1 d D U P D 2
 F1A F 0.6526(5) 0.6669(4) 0.5002(2) 0.0676(15) Uani 0.520(13) 1 d D U P B 2
 F2A F 0.5541(5) 0.6972(7) 0.4109(5) 0.086(3) Uani 0.520(13) 1 d D U P B 2
 F3A F 0.6164(7) 0.7881(3) 0.4348(4) 0.0710(19) Uani 0.520(13) 1 d D U P B 2
 F22A F 0.8856(13) 0.3272(9) 0.1746(7) 0.059(4) Uani 0.133(7) 1 d D U P A 2
 F24A F 1.0531(9) 0.2771(6) 0.1997(11) 0.070(4) Uani 0.133(7) 1 d D U P A 2
 F23A F 0.9352(19) 0.3401(11) 0.2705(6) 0.067(4) Uani 0.133(7) 1 d D U P A 2
 C43A C 0.3352(8) 1.0763(4) 0.7434(5) 0.043(2) Uani 0.333(10) 1 d D U P F 2
 H43C H 0.2945 1.0819 0.7889 0.051 Uiso 0.333(10) 1 calc R . P F 2
 H43D H 0.3758 1.1167 0.7323 0.051 Uiso 0.333(10) 1 calc R . P F 2
 C44A C 0.2560(10) 1.0942(7) 0.6848(6) 0.042(2) Uani 0.333(10) 1 d D U P F 2
 H44C H 0.1874 1.1408 0.6904 0.050 Uiso 0.333(10) 1 calc R . P F 2
 H44D H 0.2896 1.1078 0.6375 0.050 Uiso 0.333(10) 1 calc R . P F 2
 C37A C 0.2931(9) 0.8724(8) 0.3413(4) 0.039(2) Uani 0.42(2) 1 d D U P E 2
 H37A H 0.2925 0.8868 0.2914 0.047 Uiso 0.42(2) 1 calc R . P E 2
 C36A C 0.2483(11) 0.8106(8) 0.3782(5) 0.043(2) Uani 0.42(2) 1 d D U P E 2
 H36A H 0.2175 0.7840 0.3529 0.052 Uiso 0.42(2) 1 calc R . P E 2
 C39A C 0.3396(12) 0.8889(9) 0.4522(5) 0.036(2) Uani 0.42(2) 1 d D U P E 2
 H39A H 0.3716 0.9145 0.4777 0.044 Uiso 0.42(2) 1 calc R . P E 2
 C35A C 0.2485(11) 0.7880(8) 0.4519(5) 0.0350(19) Uani 0.42(2) 1 d D U P E 2
 H35A H 0.2185 0.7463 0.4766 0.042 Uiso 0.42(2) 1 calc R . P E 2
 C38A C 0.3385(8) 0.9127(9) 0.3776(5) 0.041(2) Uani 0.42(2) 1 d D U P E 2
 H38A H 0.3679 0.9548 0.3529 0.049 Uiso 0.42(2) 1 calc R . P E 2
 C34A C 0.2941(16) 0.8283(11) 0.4884(5) 0.029(2) Uani 0.42(2) 1 d D U P E 2

loop_
  _atom_site_aniso_label
  _atom_site_aniso_U_11
  _atom_site_aniso_U_22
  _atom_site_aniso_U_33
  _atom_site_aniso_U_23
  _atom_site_aniso_U_13
  _atom_site_aniso_U_12
 Rh1 0.01977(6) 0.02271(6) 0.01960(6) -0.00930(4) -0.00268(4) -0.00355(4)
 P1 0.02142(17) 0.02793(18) 0.02251(17) -0.01015(14) -0.00430(13) -0.00593(14)
 P2 0.02146(17) 0.02645(18) 0.02890(19) -0.01348(15) -0.00802(14) 0.00012(14)
 F17 0.0420(6) 0.0550(7) 0.0351(5) -0.0004(5) -0.0112(5) -0.0103(5)
 O3 0.0288(5) 0.0274(5) 0.0230(5) -0.0094(4) 0.0009(4) -0.0074(4)
 O1 0.0202(5) 0.0232(5) 0.0248(5) -0.0079(4) -0.0061(4) -0.0039(4)
 F5 0.0457(6) 0.0597(7) 0.0376(6) -0.0125(5) -0.0114(5) 0.0156(6)
 F6 0.0467(6) 0.0784(9) 0.0269(5) -0.0149(5) -0.0121(5) -0.0008(6)
 F16 0.0721(9) 0.0677(8) 0.0470(7) 0.0163(6) -0.0127(6) -0.0482(7)
 F8 0.0599(8) 0.0836(10) 0.0560(8) -0.0390(7) 0.0035(6) -0.0335(7)
 F9 0.0440(7) 0.0978(11) 0.0644(8) -0.0269(8) 0.0037(6) -0.0420(7)
 F4 0.0383(6) 0.0827(10) 0.0636(8) 0.0015(7) -0.0166(6) -0.0231(6)
 F18 0.0889(10) 0.0496(7) 0.0291(6) -0.0127(5) 0.0085(6) -0.0110(7)
 F7 0.0915(11) 0.0509(8) 0.1240(14) 0.0068(8) -0.0621(11) -0.0373(8)
 O2 0.0668(9) 0.0285(6) 0.0400(7) -0.0106(5) 0.0188(6) -0.0152(6)
 F24 0.0921(18) 0.0489(13) 0.0520(10) 0.0069(8) -0.0354(11) -0.0227(12)
 F2 0.055(3) 0.102(4) 0.087(3) -0.085(3) 0.027(2) -0.032(3)
 F20 0.0674(10) 0.1230(14) 0.0772(10) -0.0753(11) 0.0336(8) -0.0258(10)
 F23 0.0671(12) 0.0394(10) 0.1056(19) 0.0065(11) -0.0302(12) -0.0250(9)
 N1 0.0380(8) 0.0404(8) 0.0263(7) -0.0142(6) 0.0050(6) -0.0124(6)
 F19 0.0630(9) 0.1150(14) 0.0550(9) -0.0174(9) 0.0295(7) -0.0223(9)
 O4 0.0661(10) 0.0856(12) 0.0270(7) -0.0199(7) 0.0045(6) -0.0174(9)
 F22 0.142(3) 0.0368(9) 0.0743(14) -0.0300(9) 0.0040(15) -0.0209(12)
 C56 0.0256(7) 0.0311(8) 0.0218(7) -0.0073(6) 0.0020(6) -0.0039(6)
 F21 0.0362(7) 0.213(2) 0.0572(9) -0.0647(12) 0.0123(6) -0.0460(10)
 C54 0.0357(8) 0.0329(8) 0.0189(7) -0.0071(6) 0.0013(6) -0.0107(7)
 C14 0.0259(7) 0.0381(9) 0.0284(8) -0.0116(7) -0.0085(6) -0.0043(7)
 C17 0.0257(7) 0.0265(7) 0.0220(7) -0.0079(6) -0.0002(6) -0.0037(6)
 C27 0.0228(7) 0.0283(7) 0.0297(7) -0.0143(6) -0.0031(6) -0.0069(6)
 C52 0.0246(7) 0.0230(7) 0.0248(7) -0.0080(5) 0.0010(5) -0.0081(6)
 C13 0.0235(7) 0.0277(7) 0.0224(7) -0.0089(6) -0.0044(5) -0.0037(6)
 F15 0.053(2) 0.081(4) 0.138(6) -0.038(4) -0.053(3) 0.000(2)
 C59 0.0246(7) 0.0329(8) 0.0176(6) -0.0072(6) 0.0018(5) -0.0079(6)
 C75 0.0221(7) 0.0317(8) 0.0210(7) -0.0097(6) -0.0033(5) -0.0055(6)
 C41 0.0274(7) 0.0262(7) 0.0279(7) -0.0133(6) -0.0005(6) -0.0063(6)
 C18 0.0205(6) 0.0259(7) 0.0192(6) -0.0073(5) -0.0031(5) -0.0019(5)
 C51 0.0261(7) 0.0238(7) 0.0212(7) -0.0066(5) 0.0002(5) -0.0068(6)
 C79 0.0372(9) 0.0317(8) 0.0333(8) -0.0127(7) -0.0117(7) -0.0029(7)
 C19 0.0303(8) 0.0231(7) 0.0272(7) -0.0075(6) -0.0029(6) -0.0051(6)
 C40 0.0290(8) 0.0268(7) 0.0282(8) -0.0111(6) 0.0010(6) -0.0073(6)
 C15 0.0284(8) 0.0370(9) 0.0254(7) -0.0058(6) -0.0089(6) 0.0015(7)
 C78 0.0323(9) 0.0425(10) 0.0393(9) -0.0257(8) -0.0089(7) 0.0038(7)
 C46 0.0255(7) 0.0313(8) 0.0244(7) -0.0129(6) -0.0013(6) -0.0074(6)
 C53 0.0291(8) 0.0254(7) 0.0254(7) -0.0100(6) 0.0053(6) -0.0104(6)
 C7 0.0275(7) 0.0335(8) 0.0283(8) -0.0133(6) -0.0069(6) -0.0061(6)
 C60 0.0270(7) 0.0350(8) 0.0219(7) -0.0065(6) 0.0001(6) -0.0093(6)
 C80 0.0279(7) 0.0310(8) 0.0253(7) -0.0093(6) -0.0035(6) -0.0060(6)
 C16 0.0328(8) 0.0264(8) 0.0271(8) -0.0044(6) -0.0033(6) -0.0011(6)
 C71 0.0295(8) 0.0283(8) 0.0278(8) -0.0062(6) -0.0018(6) -0.0078(6)
 C77 0.0255(8) 0.0543(11) 0.0278(8) -0.0220(8) -0.0024(6) -0.0046(7)
 C22 0.0270(8) 0.0282(8) 0.0373(8) -0.0157(6) -0.0013(6) -0.0061(6)
 C26 0.0242(7) 0.0292(8) 0.0475(10) -0.0203(7) -0.0089(7) -0.0035(6)
 C64 0.0291(8) 0.0348(8) 0.0231(7) -0.0097(6) -0.0009(6) -0.0055(7)
 C1 0.0244(7) 0.0372(8) 0.0274(7) -0.0133(6) -0.0026(6) -0.0106(6)
 C2 0.0244(8) 0.0436(10) 0.0474(10) -0.0158(8) -0.0042(7) -0.0102(7)
 C67 0.0244(7) 0.0270(7) 0.0241(7) -0.0090(6) -0.0006(6) -0.0062(6)
 C68 0.0335(8) 0.0296(8) 0.0258(7) -0.0071(6) -0.0074(6) -0.0079(6)
 F10 0.092(2) 0.0553(15) 0.112(3) -0.0317(18) -0.079(2) 0.0242(17)
 C55 0.0306(8) 0.0316(8) 0.0219(7) -0.0049(6) -0.0025(6) -0.0056(6)
 C61 0.0298(8) 0.0473(10) 0.0250(7) -0.0084(7) -0.0015(6) -0.0147(7)
 C29 0.0263(8) 0.0294(8) 0.0450(10) -0.0106(7) -0.0038(7) -0.0038(6)
 C74 0.0376(9) 0.0343(8) 0.0310(8) -0.0041(7) 0.0005(7) -0.0150(7)
 F3 0.072(4) 0.054(2) 0.099(5) 0.021(3) 0.056(3) -0.009(2)
 C28 0.0227(7) 0.0297(8) 0.0379(9) -0.0164(7) -0.0073(6) -0.0016(6)
 C76 0.0254(7) 0.0406(9) 0.0231(7) -0.0120(6) -0.0013(6) -0.0085(7)
 C63 0.0298(8) 0.0423(9) 0.0241(7) -0.0098(7) -0.0032(6) -0.0004(7)
 C32 0.0347(9) 0.0417(10) 0.0502(11) -0.0175(9) -0.0158(8) 0.0124(8)
 F11 0.0572(13) 0.0333(9) 0.109(2) -0.0082(11) -0.0220(13) -0.0040(8)
 C31 0.0265(8) 0.0461(11) 0.0552(12) -0.0250(9) -0.0034(8) 0.0038(8)
 C57 0.0343(8) 0.0386(9) 0.0313(8) -0.0160(7) 0.0098(7) -0.0132(7)
 C72 0.0276(7) 0.0308(8) 0.0239(7) -0.0081(6) -0.0024(6) -0.0105(6)
 C6 0.0318(9) 0.0467(10) 0.0342(9) -0.0079(8) 0.0008(7) -0.0105(8)
 C69 0.0355(9) 0.0300(8) 0.0411(9) -0.0067(7) -0.0133(7) -0.0107(7)
 C30 0.0324(9) 0.0401(10) 0.0478(11) -0.0154(8) 0.0035(8) -0.0066(8)
 C9 0.0574(12) 0.0581(12) 0.0449(11) -0.0229(9) -0.0103(9) -0.0282(10)
 C10 0.0536(12) 0.0662(13) 0.0370(10) -0.0280(9) -0.0092(9) -0.0198(10)
 C47 0.0439(10) 0.0505(11) 0.0291(8) -0.0092(8) 0.0059(7) -0.0184(9)
 C62 0.0250(8) 0.0526(11) 0.0276(8) -0.0088(7) -0.0048(6) -0.0052(7)
 C11 0.0444(10) 0.0642(13) 0.0288(9) -0.0192(8) -0.0024(7) -0.0182(9)
 C70 0.0331(8) 0.0302(8) 0.0405(9) -0.0029(7) -0.0064(7) -0.0139(7)
 C34 0.021(3) 0.038(4) 0.030(2) -0.019(2) -0.0089(17) 0.001(2)
 C12 0.0351(9) 0.0469(10) 0.0300(8) -0.0150(7) -0.0047(7) -0.0146(8)
 C8 0.0429(10) 0.0454(10) 0.0334(9) -0.0134(7) -0.0070(7) -0.0190(8)
 C33 0.0331(9) 0.0406(10) 0.0360(9) -0.0144(8) -0.0113(7) 0.0037(7)
 C45 0.0291(8) 0.0344(9) 0.0361(9) -0.0110(7) -0.0014(7) -0.0026(7)
 C23 0.0342(9) 0.0324(9) 0.0853(16) -0.0279(10) -0.0037(9) -0.0111(8)
 C3 0.0250(8) 0.0621(13) 0.0621(13) -0.0277(11) 0.0040(8) -0.0153(8)
 C58 0.0356(9) 0.0523(11) 0.0245(8) -0.0071(7) -0.0050(7) -0.0037(8)
 B1 0.0230(8) 0.0279(8) 0.0198(7) -0.0079(6) -0.0004(6) -0.0070(6)
 F1 0.0265(15) 0.108(4) 0.048(2) -0.036(2) 0.0070(13) -0.0030(18)
 C82 0.0580(12) 0.0305(9) 0.0466(10) -0.0126(8) -0.0157(9) -0.0056(8)
 C25 0.0257(9) 0.0403(10) 0.0954(17) -0.0345(11) -0.0179(10) -0.0022(8)
 C4 0.0388(10) 0.0737(15) 0.0487(11) -0.0198(11) 0.0115(9) -0.0292(10)
 C21 0.0328(8) 0.0429(10) 0.0335(9) -0.0195(7) -0.0022(7) -0.0049(7)
 C42 0.0414(9) 0.0323(8) 0.0401(9) -0.0132(7) -0.0095(7) -0.0127(7)
 C81 0.0323(9) 0.0831(16) 0.0347(10) -0.0321(10) 0.0044(8) -0.0093(10)
 C39 0.031(2) 0.041(3) 0.0240(19) -0.0131(17) -0.0059(14) -0.0048(19)
 C5 0.0449(11) 0.0610(13) 0.0411(10) -0.0016(9) 0.0026(9) -0.0218(10)
 C65 0.0386(10) 0.0563(12) 0.0446(10) -0.0094(9) -0.0090(8) -0.0210(9)
 C48 0.0499(12) 0.0665(14) 0.0313(9) -0.0051(9) 0.0007(8) -0.0140(10)
 F12 0.109(3) 0.0579(14) 0.0820(18) -0.0238(12) 0.0449(19) 0.0092(16)
 C50 0.0438(10) 0.0502(11) 0.0348(9) -0.0236(8) 0.0084(8) -0.0077(9)
 C66 0.0404(10) 0.0478(11) 0.0430(10) -0.0131(9) -0.0106(8) 0.0059(8)
 C73 0.0563(12) 0.0412(10) 0.0582(12) -0.0015(9) -0.0272(10) -0.0233(9)
 C24 0.0298(9) 0.0454(12) 0.125(2) -0.0418(13) -0.0129(11) -0.0115(9)
 C44 0.040(2) 0.0279(16) 0.051(3) -0.010(2) 0.002(2) -0.0036(13)
 C35 0.035(3) 0.044(4) 0.045(3) -0.022(2) -0.014(2) -0.002(2)
 C20 0.0590(12) 0.0343(9) 0.0477(11) 0.0017(8) -0.0147(9) -0.0209(9)
 C36 0.044(3) 0.058(5) 0.038(3) -0.024(3) -0.017(3) 0.002(3)
 C49 0.0696(15) 0.0745(16) 0.0373(11) -0.0323(11) 0.0031(10) -0.0171(13)
 C38 0.041(2) 0.056(4) 0.030(2) -0.012(2) -0.0055(15) -0.004(2)
 C37 0.039(3) 0.062(4) 0.031(2) -0.018(2) -0.0093(17) 0.006(2)
 C43 0.0409(19) 0.0303(14) 0.050(2) -0.0179(13) -0.0012(16) -0.0123(12)
 F13 0.137(5) 0.061(2) 0.091(4) 0.020(2) -0.074(4) -0.066(3)
 F14 0.099(3) 0.152(5) 0.060(2) -0.045(3) -0.0086(18) -0.079(3)
 F15A 0.107(5) 0.045(2) 0.102(4) 0.009(2) -0.085(4) -0.028(3)
 F14A 0.069(2) 0.096(4) 0.130(5) -0.087(4) -0.020(3) -0.018(2)
 F13A 0.080(3) 0.131(5) 0.071(2) -0.007(2) -0.022(2) -0.076(3)
 F10A 0.038(3) 0.054(4) 0.147(8) -0.011(4) 0.005(3) 0.019(2)
 F11A 0.123(8) 0.036(3) 0.052(3) 0.017(2) -0.003(4) 0.006(5)
 F12A 0.098(7) 0.065(5) 0.125(8) -0.062(6) -0.074(6) 0.035(4)
 F1A 0.051(2) 0.089(3) 0.0330(15) -0.0013(14) 0.0212(13) -0.0007(17)
 F2A 0.042(2) 0.172(7) 0.090(4) -0.101(5) 0.036(2) -0.058(3)
 F3A 0.076(4) 0.0286(15) 0.091(3) -0.0158(18) 0.049(3) -0.0105(15)
 F22A 0.075(7) 0.039(7) 0.068(7) 0.001(5) -0.032(6) -0.023(6)
 F24A 0.062(6) 0.031(5) 0.107(11) -0.021(5) -0.014(5) 0.003(4)
 F23A 0.115(11) 0.037(7) 0.048(5) 0.001(4) -0.008(5) -0.030(8)
 C43A 0.047(4) 0.032(3) 0.054(4) -0.020(3) -0.001(4) -0.012(3)
 C44A 0.044(4) 0.033(3) 0.042(5) 0.000(3) -0.006(4) -0.007(3)
 C37A 0.038(4) 0.046(5) 0.023(3) -0.013(3) -0.009(3) 0.005(3)
 C36A 0.050(4) 0.043(4) 0.030(3) -0.016(2) -0.014(3) 0.002(3)
 C39A 0.034(3) 0.048(5) 0.028(3) -0.015(3) -0.010(2) -0.007(3)
 C35A 0.039(4) 0.037(4) 0.028(3) -0.013(2) -0.015(2) -0.004(2)
 C38A 0.038(3) 0.050(5) 0.026(3) -0.007(3) -0.006(2) -0.004(3)
 C34A 0.022(5) 0.032(4) 0.028(3) -0.013(2) -0.009(2) 0.004(2)

_geom_special_details
;
 All esds (except the esd in the dihedral angle between two l.s. planes)
 are estimated using the full covariance matrix.  The cell esds are taken
 into account individually in the estimation of esds in distances, angles
 and torsion angles; correlations between esds in cell parameters are only
 used when they are defined by crystal symmetry.  An approximate (isotropic)
 treatment of cell esds is used for estimating esds involving l.s. planes.
;
loop_
  _geom_bond_atom_site_label_1
  _geom_bond_atom_site_label_2
  _geom_bond_distance
  _geom_bond_site_symmetry_2
  _geom_bond_publ_flag
 Rh1 P1 2.2803(4) . ?
 Rh1 P2 2.2702(4) . ?
 Rh1 O3 2.1584(10) . ?
 Rh1 O1 2.2895(10) . ?
 Rh1 C40 1.9408(16) . ?
 Rh1 H 1.45(2) . ?
 P1 C13 1.8237(16) . ?
 P1 C7 1.8227(16) . ?
 P1 C1 1.8156(17) . ?
 P2 C26 1.8211(17) . ?
 P2 C28 1.8154(16) . ?
 P2 C34 1.843(7) . ?
 P2 C34A 1.795(9) . ?
 F17 C74 1.334(2) . ?
 O3 C46 1.2592(19) . ?
 O1 C27 1.3972(18) . ?
 O1 C18 1.4008(17) . ?
 F5 C58 1.332(2) . ?
 F6 C58 1.341(2) . ?
 F16 C74 1.337(2) . ?
 F8 C65 1.339(2) . ?
 F9 C65 1.339(2) . ?
 F4 C58 1.346(3) . ?
 F18 C74 1.328(2) . ?
 F7 C65 1.320(3) . ?
 O2 C40 1.202(2) . ?
 F24 C82 1.320(3) . ?
 F2 C57 1.287(5) . ?
 F20 C81 1.322(3) . ?
 F23 C82 1.348(3) . ?
 N1 C46 1.336(2) . ?
 N1 C47 1.469(2) . ?
 N1 C50 1.468(2) . ?
 F19 C81 1.340(3) . ?
 O4 C48 1.421(3) . ?
 O4 C49 1.416(3) . ?
 F22 C82 1.327(3) . ?
 C56 H56 0.9300 . ?
 C56 C51 1.402(2) . ?
 C56 C55 1.391(2) . ?
 F21 C81 1.311(2) . ?
 C54 H54 0.9300 . ?
 C54 C53 1.386(2) . ?
 C54 C55 1.385(2) . ?
 C14 H14 0.9300 . ?
 C14 C13 1.400(2) . ?
 C14 C15 1.375(3) . ?
 C17 C18 1.390(2) . ?
 C17 C19 1.526(2) . ?
 C17 C16 1.396(2) . ?
 C27 C22 1.388(2) . ?
 C27 C26 1.399(2) . ?
 C52 H52 0.9300 . ?
 C52 C51 1.403(2) . ?
 C52 C53 1.395(2) . ?
 C13 C18 1.401(2) . ?
 F15 C73 1.275(6) . ?
 C59 C60 1.398(2) . ?
 C59 C64 1.401(2) . ?
 C59 B1 1.644(2) . ?
 C75 C80 1.400(2) . ?
 C75 C76 1.401(2) . ?
 C75 B1 1.643(2) . ?
 C41 C40 1.571(2) . ?
 C41 C46 1.520(2) . ?
 C41 C45 1.562(2) . ?
 C41 C42 1.562(2) . ?
 C51 B1 1.642(2) . ?
 C79 C78 1.386(3) . ?
 C79 C80 1.390(2) . ?
 C79 C82 1.483(3) . ?
 C19 C22 1.516(2) . ?
 C19 C21 1.546(2) . ?
 C19 C20 1.533(2) . ?
 C15 H15 0.9300 . ?
 C15 C16 1.384(3) . ?
 C78 H78 0.9300 . ?
 C78 C77 1.378(3) . ?
 C53 C57 1.497(2) . ?
 C7 C12 1.392(2) . ?
 C7 C8 1.392(2) . ?
 C60 H60 0.9300 . ?
 C60 C61 1.395(2) . ?
 C80 H80 0.9300 . ?
 C16 H16 0.9300 . ?
 C71 C74 1.493(2) . ?
 C71 C72 1.389(2) . ?
 C71 C70 1.384(2) . ?
 C77 C76 1.393(2) . ?
 C77 C81 1.500(3) . ?
 C22 C23 1.395(2) . ?
 C26 C25 1.397(2) . ?
 C64 H64 0.9300 . ?
 C64 C63 1.392(2) . ?
 C1 C2 1.393(2) . ?
 C1 C6 1.389(3) . ?
 C2 H2 0.9300 . ?
 C2 C3 1.389(3) . ?
 C67 C68 1.398(2) . ?
 C67 C72 1.399(2) . ?
 C67 B1 1.644(2) . ?
 C68 H68 0.9300 . ?
 C68 C69 1.390(2) . ?
 F10 C66 1.293(3) . ?
 C55 C58 1.496(2) . ?
 C61 C62 1.385(3) . ?
 C61 C65 1.498(3) . ?
 C29 H29 0.9300 . ?
 C29 C28 1.395(3) . ?
 C29 C30 1.388(2) . ?
 F3 C57 1.259(4) . ?
 C28 C33 1.394(2) . ?
 C76 H76 0.9300 . ?
 C63 C62 1.384(3) . ?
 C63 C66 1.497(3) . ?
 C32 H32 0.9300 . ?
 C32 C31 1.380(3) . ?
 C32 C33 1.394(3) . ?
 F11 C66 1.390(3) . ?
 C31 H31 0.9300 . ?
 C31 C30 1.384(3) . ?
 C57 F1 1.366(4) . ?
 C57 F1A 1.376(4) . ?
 C57 F2A 1.278(4) . ?
 C57 F3A 1.304(5) . ?
 C72 H72 0.9300 . ?
 C6 H6 0.9300 . ?
 C6 C5 1.388(3) . ?
 C69 C70 1.382(3) . ?
 C69 C73 1.499(2) . ?
 C30 H30 0.9300 . ?
 C9 H9 0.9300 . ?
 C9 C10 1.378(3) . ?
 C9 C8 1.390(2) . ?
 C10 H10 0.9300 . ?
 C10 C11 1.385(3) . ?
 C47 H47A 0.9700 . ?
 C47 H47B 0.9700 . ?
 C47 C48 1.510(3) . ?
 C62 H62 0.9300 . ?
 C11 H11 0.9300 . ?
 C11 C12 1.394(2) . ?
 C70 H70 0.9300 . ?
 C34 C39 1.391(7) . ?
 C34 C35 1.403(7) . ?
 C12 H12 0.9300 . ?
 C8 H8 0.9300 . ?
 C33 H33 0.9300 . ?
 C45 H45A 0.9700 . ?
 C45 H45B 0.9700 . ?
 C45 H45C 0.9700 . ?
 C45 H45D 0.9700 . ?
 C45 C44 1.581(5) . ?
 C45 C44A 1.450(10) . ?
 C23 H23 0.9300 . ?
 C23 C24 1.376(3) . ?
 C3 H3 0.9300 . ?
 C3 C4 1.374(3) . ?
 C82 F22A 1.255(9) . ?
 C82 F24A 1.401(8) . ?
 C82 F23A 1.344(11) . ?
 C25 H25 0.9300 . ?
 C25 C24 1.383(3) . ?
 C4 H4 0.9300 . ?
 C4 C5 1.383(3) . ?
 C21 H21A 0.9600 . ?
 C21 H21B 0.9600 . ?
 C21 H21C 0.9600 . ?
 C42 H42A 0.9700 . ?
 C42 H42B 0.9700 . ?
 C42 H42C 0.9700 . ?
 C42 H42D 0.9700 . ?
 C42 C43 1.520(3) . ?
 C42 C43A 1.632(7) . ?
 C39 H39 0.9300 . ?
 C39 C38 1.395(7) . ?
 C5 H5 0.9300 . ?
 C48 H48A 0.9700 . ?
 C48 H48B 0.9700 . ?
 F12 C66 1.312(3) . ?
 C50 H50A 0.9700 . ?
 C50 H50B 0.9700 . ?
 C50 C49 1.514(3) . ?
 C66 F10A 1.432(6) . ?
 C66 F11A 1.270(7) . ?
 C66 F12A 1.152(6) . ?
 C73 F13 1.273(4) . ?
 C73 F14 1.445(4) . ?
 C73 F15A 1.281(6) . ?
 C73 F14A 1.216(4) . ?
 C73 F13A 1.415(4) . ?
 C24 H24 0.9300 . ?
 C44 H44A 0.9700 . ?
 C44 H44B 0.9700 . ?
 C44 C43 1.520(6) . ?
 C35 H35 0.9300 . ?
 C35 C36 1.402(7) . ?
 C20 H20A 0.9600 . ?
 C20 H20B 0.9600 . ?
 C20 H20C 0.9600 . ?
 C36 H36 0.9300 . ?
 C36 C37 1.372(7) . ?
 C49 H49A 0.9700 . ?
 C49 H49B 0.9700 . ?
 C38 H38 0.9300 . ?
 C38 C37 1.382(6) . ?
 C37 H37 0.9300 . ?
 C43 H43A 0.9700 . ?
 C43 H43B 0.9700 . ?
 C43A H43C 0.9700 . ?
 C43A H43D 0.9700 . ?
 C43A C44A 1.507(10) . ?
 C44A H44C 0.9700 . ?
 C44A H44D 0.9700 . ?
 C37A H37A 0.9300 . ?
 C37A C36A 1.382(8) . ?
 C37A C38A 1.371(8) . ?
 C36A H36A 0.9300 . ?
 C36A C35A 1.373(9) . ?
 C39A H39A 0.9300 . ?
 C39A C38A 1.393(10) . ?
 C39A C34A 1.366(9) . ?
 C35A H35A 0.9300 . ?
 C35A C34A 1.376(9) . ?
 C38A H38A 0.9300 . ?

loop_
  _geom_angle_atom_site_label_1
  _geom_angle_atom_site_label_2
  _geom_angle_atom_site_label_3
  _geom_angle
  _geom_angle_site_symmetry_1
  _geom_angle_site_symmetry_3
  _geom_angle_publ_flag
 P1 Rh1 O1 81.25(3) . . ?
 P1 Rh1 H 86.4(9) . . ?
 P2 Rh1 P1 160.651(14) . . ?
 P2 Rh1 O1 81.00(3) . . ?
 P2 Rh1 H 85.8(9) . . ?
 O3 Rh1 P1 94.98(3) . . ?
 O3 Rh1 P2 94.45(3) . . ?
 O3 Rh1 O1 95.96(4) . . ?
 O3 Rh1 H 174.6(9) . . ?
 O1 Rh1 H 89.4(9) . . ?
 C40 Rh1 P1 100.30(5) . . ?
 C40 Rh1 P2 97.66(5) . . ?
 C40 Rh1 O3 82.52(6) . . ?
 C40 Rh1 O1 177.90(5) . . ?
 C40 Rh1 H 92.1(9) . . ?
 C13 P1 Rh1 100.70(5) . . ?
 C7 P1 Rh1 120.41(5) . . ?
 C7 P1 C13 104.03(7) . . ?
 C1 P1 Rh1 116.56(5) . . ?
 C1 P1 C13 108.41(7) . . ?
 C1 P1 C7 105.40(7) . . ?
 C26 P2 Rh1 100.57(5) . . ?
 C26 P2 C34 110.3(4) . . ?
 C28 P2 Rh1 118.49(5) . . ?
 C28 P2 C26 105.28(8) . . ?
 C28 P2 C34 107.3(5) . . ?
 C34 P2 Rh1 114.2(4) . . ?
 C34A P2 Rh1 123.1(5) . . ?
 C34A P2 C26 102.4(5) . . ?
 C34A P2 C28 104.3(6) . . ?
 C46 O3 Rh1 113.73(10) . . ?
 C27 O1 Rh1 116.20(8) . . ?
 C27 O1 C18 118.71(12) . . ?
 C18 O1 Rh1 116.42(8) . . ?
 C46 N1 C47 120.74(15) . . ?
 C46 N1 C50 127.26(16) . . ?
 C50 N1 C47 112.00(15) . . ?
 C49 O4 C48 110.30(16) . . ?
 C51 C56 H56 118.7 . . ?
 C55 C56 H56 118.7 . . ?
 C55 C56 C51 122.58(14) . . ?
 C53 C54 H54 121.1 . . ?
 C55 C54 H54 121.1 . . ?
 C55 C54 C53 117.81(14) . . ?
 C13 C14 H14 119.8 . . ?
 C15 C14 H14 119.8 . . ?
 C15 C14 C13 120.49(15) . . ?
 C18 C17 C19 120.31(13) . . ?
 C18 C17 C16 116.88(15) . . ?
 C16 C17 C19 122.72(14) . . ?
 O1 C27 C26 116.36(13) . . ?
 C22 C27 O1 120.69(14) . . ?
 C22 C27 C26 122.95(14) . . ?
 C51 C52 H52 119.1 . . ?
 C53 C52 H52 119.1 . . ?
 C53 C52 C51 121.80(14) . . ?
 C14 C13 P1 121.57(12) . . ?
 C14 C13 C18 117.61(14) . . ?
 C18 C13 P1 120.77(11) . . ?
 C60 C59 C64 115.44(14) . . ?
 C60 C59 B1 124.30(14) . . ?
 C64 C59 B1 120.25(14) . . ?
 C80 C75 C76 115.51(15) . . ?
 C80 C75 B1 120.41(13) . . ?
 C76 C75 B1 124.08(14) . . ?
 C46 C41 C40 110.01(12) . . ?
 C46 C41 C45 114.18(13) . . ?
 C46 C41 C42 114.08(13) . . ?
 C45 C41 C40 107.13(13) . . ?
 C45 C41 C42 105.12(13) . . ?
 C42 C41 C40 105.74(13) . . ?
 O1 C18 C13 116.48(13) . . ?
 C17 C18 O1 120.54(13) . . ?
 C17 C18 C13 122.98(14) . . ?
 C56 C51 C52 115.54(13) . . ?
 C56 C51 B1 119.90(13) . . ?
 C52 C51 B1 124.33(13) . . ?
 C78 C79 C80 120.93(17) . . ?
 C78 C79 C82 120.44(17) . . ?
 C80 C79 C82 118.63(17) . . ?
 C17 C19 C21 108.06(13) . . ?
 C17 C19 C20 111.75(14) . . ?
 C22 C19 C17 108.74(12) . . ?
 C22 C19 C21 107.64(13) . . ?
 C22 C19 C20 111.79(15) . . ?
 C20 C19 C21 108.71(15) . . ?
 O2 C40 Rh1 127.37(12) . . ?
 O2 C40 C41 118.59(14) . . ?
 C41 C40 Rh1 114.04(11) . . ?
 C14 C15 H15 119.8 . . ?
 C14 C15 C16 120.37(15) . . ?
 C16 C15 H15 119.8 . . ?
 C79 C78 H78 121.0 . . ?
 C77 C78 C79 117.99(16) . . ?
 C77 C78 H78 121.0 . . ?
 O3 C46 N1 118.22(15) . . ?
 O3 C46 C41 119.59(13) . . ?
 N1 C46 C41 122.18(14) . . ?
 C54 C53 C52 121.34(14) . . ?
 C54 C53 C57 118.01(14) . . ?
 C52 C53 C57 120.61(15) . . ?
 C12 C7 P1 119.06(13) . . ?
 C12 C7 C8 119.61(15) . . ?
 C8 C7 P1 121.05(13) . . ?
 C59 C60 H60 118.9 . . ?
 C61 C60 C59 122.26(16) . . ?
 C61 C60 H60 118.9 . . ?
 C75 C80 H80 118.9 . . ?
 C79 C80 C75 122.27(16) . . ?
 C79 C80 H80 118.9 . . ?
 C17 C16 H16 119.2 . . ?
 C15 C16 C17 121.51(15) . . ?
 C15 C16 H16 119.2 . . ?
 C72 C71 C74 118.55(15) . . ?
 C70 C71 C74 120.34(15) . . ?
 C70 C71 C72 121.09(15) . . ?
 C78 C77 C76 121.02(16) . . ?
 C78 C77 C81 119.80(18) . . ?
 C76 C77 C81 119.10(19) . . ?
 C27 C22 C19 120.56(14) . . ?
 C27 C22 C23 116.84(16) . . ?
 C23 C22 C19 122.48(15) . . ?
 C27 C26 P2 120.48(12) . . ?
 C25 C26 P2 121.88(14) . . ?
 C25 C26 C27 117.64(16) . . ?
 C59 C64 H64 118.7 . . ?
 C63 C64 C59 122.57(16) . . ?
 C63 C64 H64 118.7 . . ?
 C2 C1 P1 122.65(14) . . ?
 C6 C1 P1 117.92(13) . . ?
 C6 C1 C2 119.44(16) . . ?
 C1 C2 H2 120.2 . . ?
 C3 C2 C1 119.67(19) . . ?
 C3 C2 H2 120.2 . . ?
 C68 C67 C72 115.34(14) . . ?
 C68 C67 B1 123.80(14) . . ?
 C72 C67 B1 120.43(13) . . ?
 C67 C68 H68 118.9 . . ?
 C69 C68 C67 122.24(15) . . ?
 C69 C68 H68 118.9 . . ?
 C56 C55 C58 118.07(15) . . ?
 C54 C55 C56 120.81(15) . . ?
 C54 C55 C58 121.00(15) . . ?
 C60 C61 C65 119.76(17) . . ?
 C62 C61 C60 120.99(17) . . ?
 C62 C61 C65 119.23(16) . . ?
 C28 C29 H29 119.8 . . ?
 C30 C29 H29 119.8 . . ?
 C30 C29 C28 120.44(17) . . ?
 F17 C74 F16 105.98(15) . . ?
 F17 C74 C71 112.58(14) . . ?
 F16 C74 C71 112.80(15) . . ?
 F18 C74 F17 105.61(15) . . ?
 F18 C74 F16 106.50(15) . . ?
 F18 C74 C71 112.80(15) . . ?
 C29 C28 P2 118.81(12) . . ?
 C33 C28 P2 121.24(14) . . ?
 C33 C28 C29 119.43(16) . . ?
 C75 C76 H76 118.9 . . ?
 C77 C76 C75 122.23(17) . . ?
 C77 C76 H76 118.9 . . ?
 C64 C63 C66 119.58(18) . . ?
 C62 C63 C64 120.75(17) . . ?
 C62 C63 C66 119.66(16) . . ?
 C31 C32 H32 119.8 . . ?
 C31 C32 C33 120.32(18) . . ?
 C33 C32 H32 119.8 . . ?
 C32 C31 H31 119.8 . . ?
 C32 C31 C30 120.36(17) . . ?
 C30 C31 H31 119.8 . . ?
 F2 C57 C53 111.9(4) . . ?
 F2 C57 F1 101.5(4) . . ?
 F3 C57 F2 111.8(5) . . ?
 F3 C57 C53 114.4(3) . . ?
 F3 C57 F1 105.4(4) . . ?
 F1 C57 C53 110.8(2) . . ?
 F1A C57 C53 111.0(2) . . ?
 F2A C57 C53 115.2(2) . . ?
 F2A C57 F1A 104.6(4) . . ?
 F2A C57 F3A 110.3(5) . . ?
 F3A C57 C53 113.6(3) . . ?
 F3A C57 F1A 100.7(4) . . ?
 C71 C72 C67 122.44(14) . . ?
 C71 C72 H72 118.8 . . ?
 C67 C72 H72 118.8 . . ?
 C1 C6 H6 119.8 . . ?
 C5 C6 C1 120.31(18) . . ?
 C5 C6 H6 119.8 . . ?
 C68 C69 C73 118.63(16) . . ?
 C70 C69 C68 121.32(15) . . ?
 C70 C69 C73 120.05(17) . . ?
 C29 C30 H30 120.1 . . ?
 C31 C30 C29 119.75(19) . . ?
 C31 C30 H30 120.1 . . ?
 C10 C9 H9 119.9 . . ?
 C10 C9 C8 120.29(19) . . ?
 C8 C9 H9 119.9 . . ?
 C9 C10 H10 119.9 . . ?
 C9 C10 C11 120.27(17) . . ?
 C11 C10 H10 119.9 . . ?
 N1 C47 H47A 109.7 . . ?
 N1 C47 H47B 109.7 . . ?
 N1 C47 C48 109.82(17) . . ?
 H47A C47 H47B 108.2 . . ?
 C48 C47 H47A 109.7 . . ?
 C48 C47 H47B 109.7 . . ?
 C61 C62 H62 121.0 . . ?
 C63 C62 C61 117.99(16) . . ?
 C63 C62 H62 121.0 . . ?
 C10 C11 H11 120.1 . . ?
 C10 C11 C12 119.90(19) . . ?
 C12 C11 H11 120.1 . . ?
 C71 C70 H70 121.2 . . ?
 C69 C70 C71 117.51(15) . . ?
 C69 C70 H70 121.2 . . ?
 C39 C34 P2 119.6(5) . . ?
 C39 C34 C35 118.0(6) . . ?
 C35 C34 P2 122.3(6) . . ?
 C7 C12 C11 119.97(17) . . ?
 C7 C12 H12 120.0 . . ?
 C11 C12 H12 120.0 . . ?
 C7 C8 H8 120.0 . . ?
 C9 C8 C7 119.93(18) . . ?
 C9 C8 H8 120.0 . . ?
 C28 C33 H33 120.2 . . ?
 C32 C33 C28 119.70(18) . . ?
 C32 C33 H33 120.2 . . ?
 C41 C45 H45A 110.9 . . ?
 C41 C45 H45B 110.9 . . ?
 C41 C45 H45C 109.9 . . ?
 C41 C45 H45D 109.9 . . ?
 C41 C45 C44 104.2(2) . . ?
 H45A C45 H45B 108.9 . . ?
 H45C C45 H45D 108.3 . . ?
 C44 C45 H45A 110.9 . . ?
 C44 C45 H45B 110.9 . . ?
 C44A C45 C41 109.1(5) . . ?
 C44A C45 H45C 109.9 . . ?
 C44A C45 H45D 109.9 . . ?
 C22 C23 H23 119.0 . . ?
 C24 C23 C22 121.91(18) . . ?
 C24 C23 H23 119.0 . . ?
 C2 C3 H3 119.7 . . ?
 C4 C3 C2 120.64(19) . . ?
 C4 C3 H3 119.7 . . ?
 F5 C58 F6 106.32(15) . . ?
 F5 C58 F4 105.94(16) . . ?
 F5 C58 C55 113.30(16) . . ?
 F6 C58 F4 106.39(17) . . ?
 F6 C58 C55 113.48(15) . . ?
 F4 C58 C55 110.87(15) . . ?
 C59 B1 C67 109.82(12) . . ?
 C75 B1 C59 110.48(12) . . ?
 C75 B1 C67 107.20(12) . . ?
 C51 B1 C59 111.16(12) . . ?
 C51 B1 C75 108.65(12) . . ?
 C51 B1 C67 109.44(12) . . ?
 F24 C82 F23 105.6(2) . . ?
 F24 C82 F22 107.9(2) . . ?
 F24 C82 C79 113.23(19) . . ?
 F23 C82 C79 111.79(17) . . ?
 F22 C82 F23 104.2(2) . . ?
 F22 C82 C79 113.4(2) . . ?
 F22A C82 C79 120.6(5) . . ?
 F22A C82 F24A 103.0(8) . . ?
 F22A C82 F23A 107.1(10) . . ?
 F24A C82 C79 111.4(6) . . ?
 F23A C82 C79 113.4(7) . . ?
 F23A C82 F24A 98.8(8) . . ?
 C26 C25 H25 119.7 . . ?
 C24 C25 C26 120.59(18) . . ?
 C24 C25 H25 119.7 . . ?
 C3 C4 H4 120.0 . . ?
 C3 C4 C5 119.98(19) . . ?
 C5 C4 H4 120.0 . . ?
 C19 C21 H21A 109.5 . . ?
 C19 C21 H21B 109.5 . . ?
 C19 C21 H21C 109.5 . . ?
 H21A C21 H21B 109.5 . . ?
 H21A C21 H21C 109.5 . . ?
 H21B C21 H21C 109.5 . . ?
 C41 C42 H42A 110.6 . . ?
 C41 C42 H42B 110.6 . . ?
 C41 C42 H42C 111.6 . . ?
 C41 C42 H42D 111.6 . . ?
 C41 C42 C43A 101.0(3) . . ?
 H42A C42 H42B 108.7 . . ?
 H42C C42 H42D 109.4 . . ?
 C43 C42 C41 105.80(16) . . ?
 C43 C42 H42A 110.6 . . ?
 C43 C42 H42B 110.6 . . ?
 C43A C42 H42C 111.6 . . ?
 C43A C42 H42D 111.6 . . ?
 F20 C81 F19 104.31(18) . . ?
 F20 C81 C77 112.9(2) . . ?
 F19 C81 C77 112.60(17) . . ?
 F21 C81 F20 107.72(19) . . ?
 F21 C81 F19 106.4(2) . . ?
 F21 C81 C77 112.34(16) . . ?
 C34 C39 H39 119.7 . . ?
 C34 C39 C38 120.7(5) . . ?
 C38 C39 H39 119.7 . . ?
 C6 C5 H5 120.0 . . ?
 C4 C5 C6 119.9(2) . . ?
 C4 C5 H5 120.0 . . ?
 F8 C65 C61 112.25(17) . . ?
 F9 C65 F8 105.01(16) . . ?
 F9 C65 C61 112.11(18) . . ?
 F7 C65 F8 107.0(2) . . ?
 F7 C65 F9 107.07(18) . . ?
 F7 C65 C61 112.87(16) . . ?
 O4 C48 C47 111.70(18) . . ?
 O4 C48 H48A 109.3 . . ?
 O4 C48 H48B 109.3 . . ?
 C47 C48 H48A 109.3 . . ?
 C47 C48 H48B 109.3 . . ?
 H48A C48 H48B 107.9 . . ?
 N1 C50 H50A 110.0 . . ?
 N1 C50 H50B 110.0 . . ?
 N1 C50 C49 108.67(17) . . ?
 H50A C50 H50B 108.3 . . ?
 C49 C50 H50A 110.0 . . ?
 C49 C50 H50B 110.0 . . ?
 F10 C66 C63 115.8(2) . . ?
 F10 C66 F11 103.2(3) . . ?
 F10 C66 F12 109.1(3) . . ?
 F11 C66 C63 113.06(18) . . ?
 F12 C66 C63 113.3(2) . . ?
 F12 C66 F11 100.9(3) . . ?
 F10A C66 C63 105.8(3) . . ?
 F11A C66 C63 107.2(5) . . ?
 F11A C66 F10A 97.0(6) . . ?
 F12A C66 C63 116.1(4) . . ?
 F12A C66 F10A 105.0(7) . . ?
 F12A C66 F11A 122.7(8) . . ?
 F15 C73 C69 115.1(5) . . ?
 F15 C73 F14 100.3(5) . . ?
 F13 C73 F15 110.3(5) . . ?
 F13 C73 C69 117.1(2) . . ?
 F13 C73 F14 101.4(4) . . ?
 F14 C73 C69 110.3(2) . . ?
 F15A C73 C69 112.2(4) . . ?
 F15A C73 F13A 101.8(5) . . ?
 F14A C73 C69 114.2(3) . . ?
 F14A C73 F15A 113.7(5) . . ?
 F14A C73 F13A 104.7(4) . . ?
 F13A C73 C69 109.1(2) . . ?
 C23 C24 C25 119.95(18) . . ?
 C23 C24 H24 120.0 . . ?
 C25 C24 H24 120.0 . . ?
 C45 C44 H44A 110.3 . . ?
 C45 C44 H44B 110.3 . . ?
 H44A C44 H44B 108.6 . . ?
 C43 C44 C45 107.1(3) . . ?
 C43 C44 H44A 110.3 . . ?
 C43 C44 H44B 110.3 . . ?
 C34 C35 H35 119.5 . . ?
 C36 C35 C34 121.1(6) . . ?
 C36 C35 H35 119.5 . . ?
 C19 C20 H20A 109.5 . . ?
 C19 C20 H20B 109.5 . . ?
 C19 C20 H20C 109.5 . . ?
 H20A C20 H20B 109.5 . . ?
 H20A C20 H20C 109.5 . . ?
 H20B C20 H20C 109.5 . . ?
 C35 C36 H36 120.3 . . ?
 C37 C36 C35 119.5(5) . . ?
 C37 C36 H36 120.3 . . ?
 O4 C49 C50 112.1(2) . . ?
 O4 C49 H49A 109.2 . . ?
 O4 C49 H49B 109.2 . . ?
 C50 C49 H49A 109.2 . . ?
 C50 C49 H49B 109.2 . . ?
 H49A C49 H49B 107.9 . . ?
 C39 C38 H38 119.9 . . ?
 C37 C38 C39 120.3(5) . . ?
 C37 C38 H38 119.9 . . ?
 C36 C37 C38 120.4(5) . . ?
 C36 C37 H37 119.8 . . ?
 C38 C37 H37 119.8 . . ?
 C42 C43 C44 101.9(3) . . ?
 C42 C43 H43A 111.4 . . ?
 C42 C43 H43B 111.4 . . ?
 C44 C43 H43A 111.4 . . ?
 C44 C43 H43B 111.4 . . ?
 H43A C43 H43B 109.2 . . ?
 C42 C43A H43C 110.3 . . ?
 C42 C43A H43D 110.3 . . ?
 H43C C43A H43D 108.6 . . ?
 C44A C43A C42 106.9(7) . . ?
 C44A C43A H43C 110.3 . . ?
 C44A C43A H43D 110.3 . . ?
 C45 C44A C43A 101.1(6) . . ?
 C45 C44A H44C 111.6 . . ?
 C45 C44A H44D 111.6 . . ?
 C43A C44A H44C 111.6 . . ?
 C43A C44A H44D 111.6 . . ?
 H44C C44A H44D 109.4 . . ?
 C36A C37A H37A 119.7 . . ?
 C38A C37A H37A 119.7 . . ?
 C38A C37A C36A 120.7(7) . . ?
 C37A C36A H36A 119.6 . . ?
 C35A C36A C37A 120.7(7) . . ?
 C35A C36A H36A 119.6 . . ?
 C38A C39A H39A 119.7 . . ?
 C34A C39A H39A 119.7 . . ?
 C34A C39A C38A 120.6(8) . . ?
 C36A C35A H35A 120.6 . . ?
 C36A C35A C34A 118.7(7) . . ?
 C34A C35A H35A 120.6 . . ?
 C37A C38A C39A 118.4(7) . . ?
 C37A C38A H38A 120.8 . . ?
 C39A C38A H38A 120.8 . . ?
 C39A C34A P2 115.7(8) . . ?
 C39A C34A C35A 120.9(8) . . ?
 C35A C34A P2 123.4(8) . . ?

loop_
  _geom_torsion_atom_site_label_1
  _geom_torsion_atom_site_label_2
  _geom_torsion_atom_site_label_3
  _geom_torsion_atom_site_label_4
  _geom_torsion
  _geom_torsion_site_symmetry_1
  _geom_torsion_site_symmetry_2
  _geom_torsion_site_symmetry_3
  _geom_torsion_site_symmetry_4
  _geom_torsion_publ_flag
 Rh1 P1 C13 C14 -161.78(12) . . . . ?
 Rh1 P1 C13 C18 15.60(13) . . . . ?
 Rh1 P1 C7 C12 62.09(15) . . . . ?
 Rh1 P1 C7 C8 -111.88(14) . . . . ?
 Rh1 P1 C1 C2 -141.28(12) . . . . ?
 Rh1 P1 C1 C6 38.64(15) . . . . ?
 Rh1 P2 C26 C27 -18.61(15) . . . . ?
 Rh1 P2 C26 C25 161.43(17) . . . . ?
 Rh1 P2 C28 C29 -60.92(15) . . . . ?
 Rh1 P2 C28 C33 110.76(14) . . . . ?
 Rh1 P2 C34 C39 -39.3(12) . . . . ?
 Rh1 P2 C34 C35 141.5(9) . . . . ?
 Rh1 P2 C34A C39A -36.4(16) . . . . ?
 Rh1 P2 C34A C35A 140.2(12) . . . . ?
 Rh1 O3 C46 N1 175.89(11) . . . . ?
 Rh1 O3 C46 C41 -3.12(17) . . . . ?
 Rh1 O1 C27 C22 -165.87(12) . . . . ?
 Rh1 O1 C27 C26 14.73(17) . . . . ?
 Rh1 O1 C18 C17 165.37(11) . . . . ?
 Rh1 O1 C18 C13 -14.69(16) . . . . ?
 P1 C13 C18 O1 -1.55(19) . . . . ?
 P1 C13 C18 C17 178.38(12) . . . . ?
 P1 C7 C12 C11 -174.30(15) . . . . ?
 P1 C7 C8 C9 173.01(16) . . . . ?
 P1 C1 C2 C3 179.92(14) . . . . ?
 P1 C1 C6 C5 178.67(16) . . . . ?
 P2 C26 C25 C24 178.1(2) . . . . ?
 P2 C28 C33 C32 -171.66(15) . . . . ?
 P2 C34 C39 C38 -178.8(9) . . . . ?
 P2 C34 C35 C36 -180.0(8) . . . . ?
 O1 C27 C22 C19 -7.0(2) . . . . ?
 O1 C27 C22 C23 176.94(16) . . . . ?
 O1 C27 C26 P2 3.6(2) . . . . ?
 O1 C27 C26 C25 -176.44(17) . . . . ?
 N1 C47 C48 O4 55.7(2) . . . . ?
 N1 C50 C49 O4 -57.2(2) . . . . ?
 C56 C51 B1 C59 167.80(14) . . . . ?
 C56 C51 B1 C75 46.01(18) . . . . ?
 C56 C51 B1 C67 -70.73(18) . . . . ?
 C56 C55 C58 F5 -55.6(2) . . . . ?
 C56 C55 C58 F6 -177.00(17) . . . . ?
 C56 C55 C58 F4 63.3(2) . . . . ?
 C54 C53 C57 F2 67.6(5) . . . . ?
 C54 C53 C57 F3 -60.8(7) . . . . ?
 C54 C53 C57 F1 -179.8(4) . . . . ?
 C54 C53 C57 F1A -24.6(4) . . . . ?
 C54 C53 C57 F2A -143.2(7) . . . . ?
 C54 C53 C57 F3A 88.1(5) . . . . ?
 C54 C55 C58 F5 128.38(18) . . . . ?
 C54 C55 C58 F6 7.0(3) . . . . ?
 C54 C55 C58 F4 -112.66(19) . . . . ?
 C14 C13 C18 O1 175.93(13) . . . . ?
 C14 C13 C18 C17 -4.1(2) . . . . ?
 C14 C15 C16 C17 -1.6(3) . . . . ?
 C17 C19 C22 C27 29.8(2) . . . . ?
 C17 C19 C22 C23 -154.39(18) . . . . ?
 C27 O1 C18 C17 18.82(19) . . . . ?
 C27 O1 C18 C13 -161.24(13) . . . . ?
 C27 C22 C23 C24 0.9(3) . . . . ?
 C27 C26 C25 C24 -1.8(3) . . . . ?
 C52 C51 B1 C59 -18.0(2) . . . . ?
 C52 C51 B1 C75 -139.78(14) . . . . ?
 C52 C51 B1 C67 103.48(16) . . . . ?
 C52 C53 C57 F2 -110.1(5) . . . . ?
 C52 C53 C57 F3 121.4(7) . . . . ?
 C52 C53 C57 F1 2.4(5) . . . . ?
 C52 C53 C57 F1A 157.7(4) . . . . ?
 C52 C53 C57 F2A 39.0(7) . . . . ?
 C52 C53 C57 F3A -89.6(5) . . . . ?
 C13 P1 C7 C12 -49.54(15) . . . . ?
 C13 P1 C7 C8 136.48(15) . . . . ?
 C13 P1 C1 C2 -28.62(16) . . . . ?
 C13 P1 C1 C6 151.30(13) . . . . ?
 C13 C14 C15 C16 1.9(3) . . . . ?
 C59 C60 C61 C62 0.7(2) . . . . ?
 C59 C60 C61 C65 179.36(15) . . . . ?
 C59 C64 C63 C62 0.1(3) . . . . ?
 C59 C64 C63 C66 179.91(16) . . . . ?
 C41 C45 C44 C43 18.7(5) . . . . ?
 C41 C45 C44A C43A -39.8(10) . . . . ?
 C41 C42 C43 C44 39.9(4) . . . . ?
 C41 C42 C43A C44A -24.6(9) . . . . ?
 C18 O1 C27 C22 -19.2(2) . . . . ?
 C18 O1 C27 C26 161.35(14) . . . . ?
 C18 C17 C19 C22 -30.1(2) . . . . ?
 C18 C17 C19 C21 86.47(17) . . . . ?
 C18 C17 C19 C20 -153.97(16) . . . . ?
 C18 C17 C16 C15 -1.5(2) . . . . ?
 C51 C56 C55 C54 3.5(3) . . . . ?
 C51 C56 C55 C58 -172.54(16) . . . . ?
 C51 C52 C53 C54 1.7(2) . . . . ?
 C51 C52 C53 C57 179.39(14) . . . . ?
 C79 C78 C77 C76 -0.9(2) . . . . ?
 C79 C78 C77 C81 175.90(16) . . . . ?
 C19 C17 C18 O1 7.7(2) . . . . ?
 C19 C17 C18 C13 -172.26(14) . . . . ?
 C19 C17 C16 C15 175.10(15) . . . . ?
 C19 C22 C23 C24 -175.1(2) . . . . ?
 C40 C41 C46 O3 4.0(2) . . . . ?
 C40 C41 C46 N1 -174.99(14) . . . . ?
 C40 C41 C45 C44 -106.3(3) . . . . ?
 C40 C41 C45 C44A -87.5(5) . . . . ?
 C40 C41 C42 C43 84.5(3) . . . . ?
 C40 C41 C42 C43A 113.9(4) . . . . ?
 C15 C14 C13 P1 178.29(13) . . . . ?
 C15 C14 C13 C18 0.8(2) . . . . ?
 C78 C79 C80 C75 2.8(2) . . . . ?
 C78 C79 C82 F24 106.5(3) . . . . ?
 C78 C79 C82 F23 -134.4(2) . . . . ?
 C78 C79 C82 F22 -17.0(3) . . . . ?
 C78 C79 C82 F22A -92.3(10) . . . . ?
 C78 C79 C82 F24A 28.5(9) . . . . ?
 C78 C79 C82 F23A 138.8(11) . . . . ?
 C78 C77 C76 C75 1.2(2) . . . . ?
 C78 C77 C81 F20 29.5(3) . . . . ?
 C78 C77 C81 F19 147.29(19) . . . . ?
 C78 C77 C81 F21 -92.6(3) . . . . ?
 C46 N1 C47 C48 125.51(18) . . . . ?
 C46 N1 C50 C49 -125.3(2) . . . . ?
 C46 C41 C40 Rh1 -2.86(16) . . . . ?
 C46 C41 C40 O2 176.47(16) . . . . ?
 C46 C41 C45 C44 131.7(3) . . . . ?
 C46 C41 C45 C44A 150.4(5) . . . . ?
 C46 C41 C42 C43 -154.5(2) . . . . ?
 C46 C41 C42 C43A -125.1(4) . . . . ?
 C53 C54 C55 C56 -0.6(2) . . . . ?
 C53 C54 C55 C58 175.29(16) . . . . ?
 C53 C52 C51 C56 1.0(2) . . . . ?
 C53 C52 C51 B1 -173.43(14) . . . . ?
 C7 P1 C13 C14 -36.45(15) . . . . ?
 C7 P1 C13 C18 140.93(13) . . . . ?
 C7 P1 C1 C2 82.28(15) . . . . ?
 C7 P1 C1 C6 -97.80(14) . . . . ?
 C60 C59 C64 C63 0.2(2) . . . . ?
 C60 C59 B1 C75 24.8(2) . . . . ?
 C60 C59 B1 C51 -95.90(17) . . . . ?
 C60 C59 B1 C67 142.85(14) . . . . ?
 C60 C61 C62 C63 -0.3(3) . . . . ?
 C60 C61 C65 F8 -94.3(2) . . . . ?
 C60 C61 C65 F9 147.80(17) . . . . ?
 C60 C61 C65 F7 26.8(3) . . . . ?
 C80 C75 C76 C77 0.4(2) . . . . ?
 C80 C75 B1 C59 -72.98(17) . . . . ?
 C80 C75 B1 C51 49.22(18) . . . . ?
 C80 C75 B1 C67 167.38(13) . . . . ?
 C80 C79 C78 C77 -1.1(2) . . . . ?
 C80 C79 C82 F24 -73.1(3) . . . . ?
 C80 C79 C82 F23 46.1(3) . . . . ?
 C80 C79 C82 F22 163.5(2) . . . . ?
 C80 C79 C82 F22A 88.2(10) . . . . ?
 C80 C79 C82 F24A -151.1(9) . . . . ?
 C80 C79 C82 F23A -40.7(11) . . . . ?
 C16 C17 C18 O1 -175.62(13) . . . . ?
 C16 C17 C18 C13 4.4(2) . . . . ?
 C16 C17 C19 C22 153.40(15) . . . . ?
 C16 C17 C19 C21 -90.03(18) . . . . ?
 C16 C17 C19 C20 29.5(2) . . . . ?
 C22 C27 C26 P2 -175.78(13) . . . . ?
 C22 C27 C26 C25 4.2(3) . . . . ?
 C22 C23 C24 C25 1.3(4) . . . . ?
 C26 P2 C28 C29 50.47(15) . . . . ?
 C26 P2 C28 C33 -137.85(14) . . . . ?
 C26 P2 C34 C39 -151.7(9) . . . . ?
 C26 P2 C34 C35 29.1(12) . . . . ?
 C26 P2 C34A C39A -148.0(12) . . . . ?
 C26 P2 C34A C35A 28.6(16) . . . . ?
 C26 C27 C22 C19 172.37(16) . . . . ?
 C26 C27 C22 C23 -3.7(3) . . . . ?
 C26 C25 C24 C23 -0.8(4) . . . . ?
 C64 C59 C60 C61 -0.6(2) . . . . ?
 C64 C59 B1 C75 -156.48(14) . . . . ?
 C64 C59 B1 C51 82.81(17) . . . . ?
 C64 C59 B1 C67 -38.44(18) . . . . ?
 C64 C63 C62 C61 -0.1(3) . . . . ?
 C64 C63 C66 F10 143.0(3) . . . . ?
 C64 C63 C66 F11 24.3(3) . . . . ?
 C64 C63 C66 F12 -89.8(3) . . . . ?
 C64 C63 C66 F10A -145.4(6) . . . . ?
 C64 C63 C66 F11A 111.8(6) . . . . ?
 C64 C63 C66 F12A -29.4(10) . . . . ?
 C1 P1 C13 C14 75.37(14) . . . . ?
 C1 P1 C13 C18 -107.25(13) . . . . ?
 C1 P1 C7 C12 -163.53(14) . . . . ?
 C1 P1 C7 C8 22.49(17) . . . . ?
 C1 C2 C3 C4 1.4(3) . . . . ?
 C1 C6 C5 C4 1.4(3) . . . . ?
 C2 C1 C6 C5 -1.4(3) . . . . ?
 C2 C3 C4 C5 -1.4(3) . . . . ?
 C67 C68 C69 C70 0.9(3) . . . . ?
 C67 C68 C69 C73 -178.41(17) . . . . ?
 C68 C67 C72 C71 2.0(2) . . . . ?
 C68 C67 B1 C59 145.90(15) . . . . ?
 C68 C67 B1 C75 -94.04(17) . . . . ?
 C68 C67 B1 C51 23.6(2) . . . . ?
 C68 C69 C70 C71 1.3(3) . . . . ?
 C68 C69 C73 F15 74.2(6) . . . . ?
 C68 C69 C73 F13 -153.7(5) . . . . ?
 C68 C69 C73 F14 -38.4(4) . . . . ?
 C68 C69 C73 F15A 47.8(6) . . . . ?
 C68 C69 C73 F14A -83.5(5) . . . . ?
 C68 C69 C73 F13A 159.8(4) . . . . ?
 C55 C56 C51 C52 -3.6(2) . . . . ?
 C55 C56 C51 B1 171.15(15) . . . . ?
 C55 C54 C53 C52 -1.9(2) . . . . ?
 C55 C54 C53 C57 -179.65(15) . . . . ?
 C29 C28 C33 C32 0.0(3) . . . . ?
 C74 C71 C72 C67 178.52(15) . . . . ?
 C74 C71 C70 C69 179.84(16) . . . . ?
 C28 P2 C26 C27 -142.25(14) . . . . ?
 C28 P2 C26 C25 37.79(19) . . . . ?
 C28 P2 C34 C39 94.1(10) . . . . ?
 C28 P2 C34 C35 -85.0(11) . . . . ?
 C28 P2 C34A C39A 102.4(13) . . . . ?
 C28 P2 C34A C35A -81.0(15) . . . . ?
 C28 C29 C30 C31 -0.2(3) . . . . ?
 C76 C75 C80 C79 -2.4(2) . . . . ?
 C76 C75 B1 C59 106.52(16) . . . . ?
 C76 C75 B1 C51 -131.28(15) . . . . ?
 C76 C75 B1 C67 -13.11(19) . . . . ?
 C76 C77 C81 F20 -153.72(18) . . . . ?
 C76 C77 C81 F19 -35.9(2) . . . . ?
 C76 C77 C81 F21 84.2(3) . . . . ?
 C32 C31 C30 C29 -0.1(3) . . . . ?
 C31 C32 C33 C28 -0.3(3) . . . . ?
 C72 C71 C74 F17 55.3(2) . . . . ?
 C72 C71 C74 F16 175.19(16) . . . . ?
 C72 C71 C74 F18 -64.1(2) . . . . ?
 C72 C71 C70 C69 -1.7(3) . . . . ?
 C72 C67 C68 C69 -2.5(2) . . . . ?
 C72 C67 B1 C59 -41.97(18) . . . . ?
 C72 C67 B1 C75 78.09(17) . . . . ?
 C72 C67 B1 C51 -164.25(14) . . . . ?
 C6 C1 C2 C3 0.0(3) . . . . ?
 C30 C29 C28 P2 172.09(14) . . . . ?
 C30 C29 C28 C33 0.3(3) . . . . ?
 C9 C10 C11 C12 -1.7(3) . . . . ?
 C10 C9 C8 C7 0.8(3) . . . . ?
 C10 C11 C12 C7 1.5(3) . . . . ?
 C47 N1 C46 O3 -3.4(2) . . . . ?
 C47 N1 C46 C41 175.55(15) . . . . ?
 C47 N1 C50 C49 54.4(2) . . . . ?
 C62 C61 C65 F8 84.4(2) . . . . ?
 C62 C61 C65 F9 -33.5(2) . . . . ?
 C62 C61 C65 F7 -154.54(19) . . . . ?
 C62 C63 C66 F10 -37.2(4) . . . . ?
 C62 C63 C66 F11 -156.0(2) . . . . ?
 C62 C63 C66 F12 89.9(3) . . . . ?
 C62 C63 C66 F10A 34.3(6) . . . . ?
 C62 C63 C66 F11A -68.4(7) . . . . ?
 C62 C63 C66 F12A 150.3(9) . . . . ?
 C70 C71 C74 F17 -126.21(17) . . . . ?
 C70 C71 C74 F16 -6.3(2) . . . . ?
 C70 C71 C74 F18 114.39(19) . . . . ?
 C70 C71 C72 C67 0.0(3) . . . . ?
 C70 C69 C73 F15 -105.1(5) . . . . ?
 C70 C69 C73 F13 27.0(6) . . . . ?
 C70 C69 C73 F14 142.3(4) . . . . ?
 C70 C69 C73 F15A -131.5(5) . . . . ?
 C70 C69 C73 F14A 97.2(5) . . . . ?
 C70 C69 C73 F13A -19.5(5) . . . . ?
 C34 P2 C26 C27 102.3(5) . . . . ?
 C34 P2 C26 C25 -77.6(5) . . . . ?
 C34 P2 C28 C29 168.0(4) . . . . ?
 C34 P2 C28 C33 -20.4(4) . . . . ?
 C34 C39 C38 C37 -1.6(13) . . . . ?
 C34 C35 C36 C37 -1.0(12) . . . . ?
 C12 C7 C8 C9 -0.9(3) . . . . ?
 C8 C7 C12 C11 -0.2(3) . . . . ?
 C8 C9 C10 C11 0.5(4) . . . . ?
 C33 C32 C31 C30 0.4(3) . . . . ?
 C45 C41 C40 Rh1 -127.50(12) . . . . ?
 C45 C41 C40 O2 51.8(2) . . . . ?
 C45 C41 C46 O3 124.45(15) . . . . ?
 C45 C41 C46 N1 -54.5(2) . . . . ?
 C45 C41 C42 C43 -28.7(3) . . . . ?
 C45 C41 C42 C43A 0.7(4) . . . . ?
 C45 C44 C43 C42 -36.2(5) . . . . ?
 C3 C4 C5 C6 0.0(3) . . . . ?
 B1 C59 C60 C61 178.16(14) . . . . ?
 B1 C59 C64 C63 -178.62(14) . . . . ?
 B1 C75 C80 C79 177.14(14) . . . . ?
 B1 C75 C76 C77 -179.09(14) . . . . ?
 B1 C67 C68 C69 170.02(15) . . . . ?
 B1 C67 C72 C71 -170.76(14) . . . . ?
 C82 C79 C78 C77 179.40(16) . . . . ?
 C82 C79 C80 C75 -177.66(15) . . . . ?
 C21 C19 C22 C27 -87.06(18) . . . . ?
 C21 C19 C22 C23 88.8(2) . . . . ?
 C42 C41 C40 Rh1 120.76(12) . . . . ?
 C42 C41 C40 O2 -59.9(2) . . . . ?
 C42 C41 C46 O3 -114.64(16) . . . . ?
 C42 C41 C46 N1 66.4(2) . . . . ?
 C42 C41 C45 C44 5.9(3) . . . . ?
 C42 C41 C45 C44A 24.6(5) . . . . ?
 C42 C43A C44A C45 39.7(11) . . . . ?
 C81 C77 C76 C75 -175.59(15) . . . . ?
 C39 C34 C35 C36 0.8(15) . . . . ?
 C39 C38 C37 C36 1.5(10) . . . . ?
 C65 C61 C62 C63 -178.99(16) . . . . ?
 C48 O4 C49 C50 59.8(2) . . . . ?
 C50 N1 C46 O3 176.19(16) . . . . ?
 C50 N1 C46 C41 -4.8(3) . . . . ?
 C50 N1 C47 C48 -54.2(2) . . . . ?
 C66 C63 C62 C61 -179.84(16) . . . . ?
 C73 C69 C70 C71 -179.44(18) . . . . ?
 C35 C34 C39 C38 0.5(16) . . . . ?
 C35 C36 C37 C38 -0.2(9) . . . . ?
 C20 C19 C22 C27 153.63(16) . . . . ?
 C20 C19 C22 C23 -30.5(2) . . . . ?
 C49 O4 C48 C47 -58.7(2) . . . . ?
 C37A C36A C35A C34A 0.2(16) . . . . ?
 C36A C37A C38A C39A 0.9(14) . . . . ?
 C36A C35A C34A P2 -177.3(11) . . . . ?
 C36A C35A C34A C39A -1(2) . . . . ?
 C38A C37A C36A C35A -0.2(14) . . . . ?
 C38A C39A C34A P2 178.2(11) . . . . ?
 C38A C39A C34A C35A 2(2) . . . . ?
 C34A P2 C26 C27 109.0(6) . . . . ?
 C34A P2 C26 C25 -71.0(6) . . . . ?
 C34A P2 C28 C29 157.9(5) . . . . ?
 C34A P2 C28 C33 -30.4(5) . . . . ?
 C34A C39A C38A C37A -1.5(18) . . . . ?

_shelx_res_file
;
    083aim16.res created by SHELXL-2014/7

TITL 083aim16.res in P-1
CELL 1.54184 12.8242 16.9411 19.1569 76.451 83.436 69.514
ZERR 2 0.0002 0.0003 0.0003 0.001 0.001 0.001
LATT 1
SFAC C H B F N O P Rh
UNIT 164 122 2 48 2 8 4 2
SADI 0.04 F15 F13 F15 F14 F13 F14 F15A F14A F15A F13A F14A F13A
SADI C73 F15 C73 F13 C73 F14 C73 F15A C73 F14A C73 F13A
SADI 0.04 F10 F11 F10 F12 F11 F12 F10A F11A F10A F12A F11A F12A
SADI C66 F10 C66 F11 C66 F12 C66 F10A C66 F11A C66 F12A
SADI 0.04 F2 F3 F2 F1 F3 F1 F1A F2A F1A F3A F2A F3A
SADI C57 F2 C57 F3 C57 F1 C57 F1A C57 F2A C57 F3A
SADI 0.04 F24 F23 F24 F22 F23 F22 F22A F24A F22A F23A F24A F23A
SADI C82 F24 C82 F23 C82 F22 C82 C79 C82 F22A C82 F24A C82 F23A
SADI C45 C44A C45 C44
SADI C44 C43 C44A C43A
SADI C35A C34A C36A C35A C36 C35 C35 C34 C38 C37 C39A C38A C39 C38 C38A C37A =
 C39 C34 C39A C34A C37 C36 C37A C36A
SADI P2 C34 P2 C34A
SIMU C73 F13 F15 F14
SIMU 0.01 0.02 2 C73 F14A F13A F15A
SIMU C66 F10A F11A F12A
SIMU C66 F10 F11 F12
SIMU C57 F3A F1A F2A
SIMU 0.01 0.02 2 C57 F1 F2 F3
SIMU C82 F22A F23A F24A
SIMU C82 F22 F23 F24
SIMU C42 C43 C44 C45
SIMU C42 C43A C44A C45
SIMU P2 C34 C35 C36 C37 C38 C39
SIMU P2 C34A C35A C36A C37A C38A C39A
RIGU C73 F13 F15 F14
RIGU C73 F14A F13A F15A
RIGU C66 F10A F11A F12A
RIGU C66 F10 F11 F12
RIGU C57 F3A F1A F2A
RIGU C57 F1 F2 F3
RIGU C82 F22A F23A F24A
RIGU C82 F22 F23 F24
RIGU C42 C43 C44 C45
RIGU C42 C43A C44A C45
RIGU P2 C34 C35 C36 C37 C38 C39
RIGU P2 C34A C35A C36A C37A C38A C39A

L.S. 20
PLAN  20
BOND $H
list 4
MORE -1
CONF
fmap 2
acta
REM <olex2.extras>
REM <HklSrc "%.\\083aim16.hkl">
REM </olex2.extras>

WGHT    0.037300    2.177600
FVAR       0.29052   0.51754   0.73746   0.47997   0.86667   0.66749   0.57838
RH1   8    0.456253    0.795536    0.639457    11.00000    0.01977    0.02271 =
         0.01960   -0.00930   -0.00268   -0.00355
P1    7    0.633087    0.748648    0.679079    11.00000    0.02142    0.02793 =
         0.02251   -0.01015   -0.00430   -0.00593
P2    7    0.305192    0.801908    0.584205    11.00000    0.02146    0.02645 =
         0.02890   -0.01348   -0.00802    0.00012
F17   4    0.816146    0.928636   -0.050987    11.00000    0.04196    0.05497 =
         0.03514   -0.00037   -0.01116   -0.01026
O3    6    0.377839    0.785651    0.745518    11.00000    0.02882    0.02735 =
         0.02304   -0.00939    0.00095   -0.00744
O1    6    0.503969    0.652865    0.636430    11.00000    0.02024    0.02319 =
         0.02480   -0.00789   -0.00606   -0.00392
F5    4    1.114099    0.497844    0.399901    11.00000    0.04571    0.05974 =
         0.03764   -0.01254   -0.01145    0.01561
F6    4    1.047362    0.567831    0.483567    11.00000    0.04674    0.07838 =
         0.02685   -0.01489   -0.01212   -0.00082
F16   4    0.975429    0.944294   -0.060228    11.00000    0.07210    0.06767 =
         0.04697    0.01633   -0.01265   -0.04818
F8    4    0.535161    0.605274    0.019568    11.00000    0.05992    0.08365 =
         0.05601   -0.03897    0.00355   -0.03354
F9    4    0.411691    0.624135    0.103755    11.00000    0.04401    0.09778 =
         0.06440   -0.02687    0.00366   -0.04199
F4    4    1.112165    0.627411    0.384741    11.00000    0.03828    0.08273 =
         0.06360    0.00154   -0.01656   -0.02306
F18   4    0.959437    0.829079   -0.077459    11.00000    0.08887    0.04960 =
         0.02910   -0.01275    0.00846   -0.01098
F7    4    0.570802    0.526613    0.124731    11.00000    0.09146    0.05093 =
         0.12395    0.00683   -0.06209   -0.03734
O2    6    0.423028    0.974392    0.597316    11.00000    0.06678    0.02851 =
         0.04002   -0.01057    0.01878   -0.01525
PART 1
F24   4    0.990503    0.318111    0.265656    51.00000    0.09212    0.04891 =
         0.05198    0.00690   -0.03543   -0.02274
F2    4    0.637053    0.774316    0.452748    41.00000    0.05512    0.10163 =
         0.08684   -0.08486    0.02707   -0.03240
PART 0
F20   4    1.197656    0.448522   -0.008807    11.00000    0.06742    0.12303 =
         0.07720   -0.07528    0.03362   -0.02583
PART 1
F23   4    0.846372    0.359305    0.203812    51.00000    0.06709    0.03939 =
         0.10560    0.00654   -0.03018   -0.02502

PART 0
N1    5    0.279504    0.858075    0.827970    11.00000    0.03796    0.04042 =
         0.02625   -0.01421    0.00504   -0.01244

F19   4    1.145396    0.583259   -0.022397    11.00000    0.06301    0.11498 =
         0.05502   -0.01743    0.02948   -0.02234
O4    6    0.251813    0.833904    0.979355    11.00000    0.06607    0.08560 =
         0.02703   -0.01988    0.00455   -0.01743
PART 1
F22   4    1.000986    0.286627    0.162597    51.00000    0.14230    0.03679 =
         0.07430   -0.02999    0.00398   -0.02085
PART 0
C56   1    0.936333    0.615646    0.306198    11.00000    0.02556    0.03107 =
         0.02181   -0.00725    0.00196   -0.00388
AFIX  43
H56   2    1.001971    0.592293    0.280819    11.00000   -1.20000
AFIX   0
F21   4    1.260188    0.504499    0.058083    11.00000    0.03623    0.21291 =
         0.05724   -0.06467    0.01234   -0.04597
C54   1    0.844165    0.639075    0.420340    11.00000    0.03574    0.03286 =
         0.01895   -0.00712    0.00130   -0.01065
AFIX  43
H54   2    0.846490    0.634543    0.469508    11.00000   -1.20000
AFIX   0

C14   1    0.747280    0.577529    0.747730    11.00000    0.02594    0.03810 =
         0.02836   -0.01156   -0.00852   -0.00434
AFIX  43
H14   2    0.792821    0.600014    0.765548    11.00000   -1.20000
AFIX   0
C17   1    0.613450    0.507588    0.692571    11.00000    0.02574    0.02655 =
         0.02201   -0.00794   -0.00025   -0.00374
C27   1    0.416676    0.624680    0.628436    11.00000    0.02277    0.02829 =
         0.02966   -0.01426   -0.00306   -0.00693

C52   1    0.740525    0.685018    0.311378    11.00000    0.02457    0.02297 =
         0.02482   -0.00802    0.00098   -0.00813
AFIX  43
H52   2    0.672207    0.711308    0.289504    11.00000   -1.20000
AFIX   0

C13   1    0.661191    0.632565    0.702434    11.00000    0.02354    0.02775 =
         0.02244   -0.00889   -0.00440   -0.00371
PART 1
F15   4    1.191116    0.781470    0.210599    21.00000    0.05276    0.08071 =
         0.13752   -0.03827   -0.05250   -0.00031
PART 0
C59   1    0.715533    0.701220    0.150223    11.00000    0.02459    0.03292 =
         0.01764   -0.00724    0.00184   -0.00793
C75   1    0.923733    0.585326    0.155439    11.00000    0.02207    0.03170 =
         0.02098   -0.00973   -0.00332   -0.00553

C41   1    0.349388    0.937605    0.716193    11.00000    0.02744    0.02617 =
         0.02787   -0.01330   -0.00047   -0.00629
C18   1    0.593934    0.595775    0.677758    11.00000    0.02048    0.02594 =
         0.01916   -0.00726   -0.00310   -0.00188
C51   1    0.837101    0.655756    0.268977    11.00000    0.02608    0.02380 =
         0.02117   -0.00658    0.00022   -0.00684
C79   1    0.977076    0.430043    0.164835    11.00000    0.03717    0.03174 =
         0.03326   -0.01272   -0.01175   -0.00295
C19   1    0.546272    0.470715    0.656435    11.00000    0.03028    0.02313 =
         0.02716   -0.00750   -0.00287   -0.00511
C40   1    0.410494    0.916409    0.643520    11.00000    0.02903    0.02684 =
         0.02816   -0.01112    0.00104   -0.00733
C15   1    0.764988    0.490463    0.766065    11.00000    0.02844    0.03702 =
         0.02538   -0.00583   -0.00891    0.00152
AFIX  43
H15   2    0.820959    0.454697    0.797330    11.00000   -1.20000
AFIX   0

C78   1    1.060682    0.430366    0.112167    11.00000    0.03226    0.04252 =
         0.03931   -0.02569   -0.00892    0.00385
AFIX  43
H78   2    1.105122    0.379810    0.097936    11.00000   -1.20000
AFIX   0

C46   1    0.336017    0.856639    0.764969    11.00000    0.02547    0.03132 =
         0.02439   -0.01288   -0.00129   -0.00739
C53   1    0.744167    0.675758    0.385456    11.00000    0.02909    0.02536 =
         0.02542   -0.00998    0.00532   -0.01036
C7    1    0.660153    0.774286    0.761015    11.00000    0.02751    0.03349 =
         0.02834   -0.01334   -0.00688   -0.00608
C60   1    0.671433    0.643993    0.132549    11.00000    0.02704    0.03503 =
         0.02189   -0.00646    0.00009   -0.00934
AFIX  43
H60   2    0.715653    0.586440    0.136898    11.00000   -1.20000
AFIX   0
C80   1    0.911975    0.505402    0.186891    11.00000    0.02790    0.03102 =
         0.02534   -0.00933   -0.00350   -0.00597
AFIX  43
H80   2    0.858763    0.502628    0.223822    11.00000   -1.20000
AFIX   0

C16   1    0.699967    0.455772    0.738244    11.00000    0.03285    0.02639 =
         0.02706   -0.00442   -0.00328   -0.00106
AFIX  43
H16   2    0.714266    0.396582    0.750264    11.00000   -1.20000
AFIX   0

C71   1    0.939513    0.847190    0.041921    11.00000    0.02949    0.02829 =
         0.02778   -0.00622   -0.00175   -0.00778
C77   1    1.075953    0.507860    0.081538    11.00000    0.02550    0.05432 =
         0.02781   -0.02200   -0.00238   -0.00462
C22   1    0.431677    0.537337    0.641500    11.00000    0.02697    0.02818 =
         0.03735   -0.01566   -0.00127   -0.00607
C26   1    0.315962    0.688829    0.606238    11.00000    0.02424    0.02923 =
         0.04750   -0.02029   -0.00892   -0.00352
C64   1    0.644222    0.786853    0.141575    11.00000    0.02907    0.03479 =
         0.02312   -0.00967   -0.00088   -0.00553
AFIX  43
H64   2    0.669791    0.827445    0.152481    11.00000   -1.20000
AFIX   0

C1    1    0.739250    0.770222    0.613789    11.00000    0.02438    0.03722 =
         0.02739   -0.01335   -0.00260   -0.01058
C2    1    0.846537    0.711364    0.610749    11.00000    0.02441    0.04363 =
         0.04741   -0.01582   -0.00420   -0.01018
AFIX  43
H2    2    0.866418    0.658524    0.642984    11.00000   -1.20000
AFIX   0

C67   1    0.894900    0.749650    0.147408    11.00000    0.02438    0.02701 =
         0.02415   -0.00901   -0.00061   -0.00616
C68   1    0.965666    0.770513    0.184845    11.00000    0.03355    0.02963 =
         0.02581   -0.00707   -0.00744   -0.00787
AFIX  43
H68   2    0.974524    0.746425    0.233597    11.00000   -1.20000
AFIX   0
PART 1
F10   4    0.400981    0.937451    0.055130    31.00000    0.09232    0.05535 =
         0.11236   -0.03166   -0.07932    0.02421
PART 0
C55   1    0.940492    0.609399    0.379581    11.00000    0.03057    0.03158 =
         0.02188   -0.00490   -0.00249   -0.00559
C61   1    0.563387    0.670278    0.108621    11.00000    0.02982    0.04733 =
         0.02495   -0.00839   -0.00145   -0.01471

C29   1    0.135108    0.830666    0.688233    11.00000    0.02627    0.02936 =
         0.04498   -0.01062   -0.00380   -0.00381
AFIX  43
H29   2    0.179679    0.779076    0.715280    11.00000   -1.20000
AFIX   0

C74   1    0.923122    0.886833   -0.036060    11.00000    0.03764    0.03428 =
         0.03103   -0.00410    0.00051   -0.01501
PART 1
F3    4    0.619038    0.651662    0.478609    41.00000    0.07220    0.05414 =
         0.09934    0.02077    0.05569   -0.00936

PART 0
C28   1    0.167699    0.859253    0.617576    11.00000    0.02270    0.02971 =
         0.03789   -0.01639   -0.00735   -0.00156

C76   1    1.008472    0.583770    0.102162    11.00000    0.02536    0.04057 =
         0.02307   -0.01198   -0.00128   -0.00855
AFIX  43
H76   2    1.020061    0.635165    0.079806    11.00000   -1.20000
AFIX   0
C63   1    0.536540    0.813588    0.117287    11.00000    0.02976    0.04228 =
         0.02411   -0.00979   -0.00318   -0.00044

C32   1    0.002045    0.984782    0.608371    11.00000    0.03472    0.04166 =
         0.05023   -0.01745   -0.01585    0.01238
AFIX  43
H32   2   -0.042649    1.036672    0.581790    11.00000   -1.20000
AFIX   0

PART 1
F11   4    0.526228    0.961587    0.099936    31.00000    0.05724    0.03333 =
         0.10876   -0.00818   -0.02197   -0.00398

PART 0
C31   1   -0.029545    0.955607    0.678209    11.00000    0.02647    0.04614 =
         0.05521   -0.02499   -0.00336    0.00384
AFIX  43
H31   2   -0.095635    0.987789    0.698355    11.00000   -1.20000
AFIX   0

C57   1    0.639844    0.708410    0.429222    11.00000    0.03432    0.03861 =
         0.03134   -0.01602    0.00981   -0.01316
C72   1    0.882635    0.791213    0.075022    11.00000    0.02762    0.03084 =
         0.02394   -0.00813   -0.00244   -0.01050
AFIX  43
H72   2    0.834625    0.780984    0.048073    11.00000   -1.20000
AFIX   0

C6    1    0.710923    0.848835    0.565262    11.00000    0.03183    0.04674 =
         0.03425   -0.00786    0.00078   -0.01053
AFIX  43
H6    2    0.638944    0.887900    0.566335    11.00000   -1.20000
AFIX   0

C69   1    1.023243    0.826049    0.151664    11.00000    0.03553    0.03001 =
         0.04106   -0.00665   -0.01332   -0.01073
C30   1    0.036597    0.878711    0.718432    11.00000    0.03235    0.04013 =
         0.04779   -0.01536    0.00348   -0.00665
AFIX  43
H30   2    0.015123    0.859308    0.765509    11.00000   -1.20000
AFIX   0
C9    1    0.728407    0.855871    0.820771    11.00000    0.05743    0.05812 =
         0.04491   -0.02295   -0.01033   -0.02815
AFIX  43
H9    2    0.767093    0.893634    0.819030    11.00000   -1.20000
AFIX   0
C10   1    0.680436    0.825838    0.884849    11.00000    0.05361    0.06617 =
         0.03703   -0.02800   -0.00921   -0.01982
AFIX  43
H10   2    0.686374    0.843767    0.926099    11.00000   -1.20000
AFIX   0
C47   1    0.261325    0.779837    0.871342    11.00000    0.04392    0.05048 =
         0.02907   -0.00922    0.00592   -0.01837
AFIX  23
H47A  2    0.300874    0.731283    0.848974    11.00000   -1.20000
H47B  2    0.182571    0.787252    0.873943    11.00000   -1.20000
AFIX   0

C62   1    0.494829    0.755436    0.100544    11.00000    0.02496    0.05263 =
         0.02761   -0.00875   -0.00483   -0.00523
AFIX  43
H62   2    0.422928    0.773031    0.084358    11.00000   -1.20000
AFIX   0

C11   1    0.623418    0.769074    0.888090    11.00000    0.04442    0.06418 =
         0.02882   -0.01921   -0.00242   -0.01815
AFIX  43
H11   2    0.592805    0.747753    0.931680    11.00000   -1.20000
AFIX   0

C70   1    1.012014    0.864583    0.079586    11.00000    0.03310    0.03018 =
         0.04055   -0.00288   -0.00637   -0.01386
AFIX  43
H70   2    1.051676    0.900835    0.057231    11.00000   -1.20000
AFIX   0

PART 1
C34   1    0.309339    0.840608    0.486000    71.00000    0.02098    0.03782 =
         0.03036   -0.01939   -0.00890    0.00146
PART 0
C12   1    0.611971    0.743929    0.825908    11.00000    0.03510    0.04691 =
         0.03001   -0.01503   -0.00468   -0.01463
AFIX  43
H12   2    0.572172    0.706895    0.827767    11.00000   -1.20000
AFIX   0
C8    1    0.719239    0.829969    0.758690    11.00000    0.04290    0.04545 =
         0.03336   -0.01342   -0.00695   -0.01901
AFIX  43
H8    2    0.752532    0.849812    0.715662    11.00000   -1.20000
AFIX   0
C33   1    0.100634    0.936845    0.577475    11.00000    0.03314    0.04059 =
         0.03601   -0.01436   -0.01132    0.00371
AFIX  43
H33   2    0.121571    0.956528    0.530336    11.00000   -1.20000
AFIX   0
C45   1    0.237136    1.012381    0.696783    11.00000    0.02913    0.03444 =
         0.03609   -0.01099   -0.00142   -0.00257
PART 1
AFIX  23
H45A  2    0.175989    1.000615    0.726977    61.00000   -1.20000
H45B  2    0.220823    1.020651    0.646848    61.00000   -1.20000
AFIX  23
PART 0
PART 2
H45C  2    0.208872    1.007241    0.653800   -61.00000   -1.20000
H45D  2    0.182308    1.009167    0.735692   -61.00000   -1.20000
AFIX   0
PART 0
C23   1    0.338617    0.515026    0.635629    11.00000    0.03424    0.03242 =
         0.08525   -0.02791   -0.00370   -0.01107
AFIX  43
H23   2    0.345530    0.457065    0.644694    11.00000   -1.20000
AFIX   0
C3    1    0.923714    0.731971    0.559327    11.00000    0.02498    0.06210 =
         0.06215   -0.02770    0.00396   -0.01527
AFIX  43
H3    2    0.994861    0.692167    0.556600    11.00000   -1.20000
AFIX   0

C58   1    1.052427    0.575174    0.412151    11.00000    0.03561    0.05225 =
         0.02445   -0.00711   -0.00497   -0.00370
B1    3    0.840805    0.673282    0.180848    11.00000    0.02302    0.02790 =
         0.01984   -0.00789   -0.00040   -0.00697
PART 1
F1    4    0.548927    0.742256    0.387194    41.00000    0.02650    0.10763 =
         0.04758   -0.03623    0.00704   -0.00298
PART 0
C82   1    0.955974    0.348723    0.199254    11.00000    0.05795    0.03049 =
         0.04660   -0.01261   -0.01569   -0.00565

C25   1    0.225361    0.662789    0.601718    11.00000    0.02573    0.04026 =
         0.09536   -0.03451   -0.01788   -0.00222
AFIX  43
H25   2    0.156706    0.703986    0.588441    11.00000   -1.20000
AFIX   0
C4    1    0.895947    0.810607    0.512448    11.00000    0.03879    0.07368 =
         0.04868   -0.01980    0.01154   -0.02924
AFIX  43
H4    2    0.948688    0.824307    0.478904    11.00000   -1.20000
AFIX   0
C21   1    0.604781    0.455070    0.583332    11.00000    0.03280    0.04291 =
         0.03352   -0.01948   -0.00219   -0.00487
AFIX 137
H21A  2    0.610569    0.508164    0.554707    11.00000   -1.50000
H21B  2    0.562159    0.434040    0.558734    11.00000   -1.50000
H21C  2    0.677956    0.413288    0.591151    11.00000   -1.50000
AFIX   0
C42   1    0.420950    0.977987    0.747907    11.00000    0.04144    0.03225 =
         0.04015   -0.01321   -0.00946   -0.01275
PART 1
AFIX  23
H42A  2    0.409092    0.970507    0.799622    61.00000   -1.20000
H42B  2    0.499531    0.951055    0.737151    61.00000   -1.20000
AFIX  23
PART 0
PART 2
H42C  2    0.488563    0.976750    0.719055   -61.00000   -1.20000
H42D  2    0.440056    0.948902    0.797078   -61.00000   -1.20000
AFIX   0

PART 0
C81   1    1.170255    0.510327    0.027962    11.00000    0.03230    0.08310 =
         0.03470   -0.03206    0.00439   -0.00935

PART 1
C39   1    0.350833    0.907415    0.456676    71.00000    0.03065    0.04142 =
         0.02401   -0.01305   -0.00592   -0.00481
AFIX  43
H39   2    0.377511    0.931323    0.486768    71.00000   -1.20000
AFIX   0
PART 0
C5    1    0.789532    0.869377    0.515168    11.00000    0.04492    0.06099 =
         0.04110   -0.00157    0.00265   -0.02179
AFIX  43
H5    2    0.770679    0.922605    0.483458    11.00000   -1.20000
AFIX   0

C65   1    0.521287    0.606114    0.089773    11.00000    0.03863    0.05630 =
         0.04463   -0.00939   -0.00896   -0.02100
C48   1    0.302468    0.762186    0.946104    11.00000    0.04995    0.06648 =
         0.03128   -0.00506    0.00073   -0.01403
AFIX  23
H48A  2    0.286234    0.712412    0.975178    11.00000   -1.20000
H48B  2    0.382622    0.748785    0.943565    11.00000   -1.20000
AFIX   0

PART 1
F12   4    0.405528    0.923626    0.167857    31.00000    0.10924    0.05790 =
         0.08201   -0.02384    0.04485    0.00923

PART 0
C50   1    0.229888    0.932043    0.862718    11.00000    0.04383    0.05025 =
         0.03484   -0.02362    0.00836   -0.00771
AFIX  23
H50A  2    0.149397    0.947782    0.865312    11.00000   -1.20000
H50B  2    0.249120    0.981128    0.835007    11.00000   -1.20000
AFIX   0

C66   1    0.465004    0.906211    0.109475    11.00000    0.04036    0.04775 =
         0.04298   -0.01313   -0.01061    0.00590
C73   1    1.099687    0.842988    0.195539    11.00000    0.05631    0.04116 =
         0.05820   -0.00151   -0.02723   -0.02330
C24   1    0.236860    0.576313    0.616809    11.00000    0.02979    0.04536 =
         0.12465   -0.04178   -0.01290   -0.01148
AFIX  43
H24   2    0.175887    0.559565    0.614246    11.00000   -1.20000
AFIX   0
PART 1
C44   1    0.257076    1.094099    0.711174    61.00000    0.04020    0.02786 =
         0.05060   -0.00972    0.00198   -0.00365
AFIX  23
H44A  2    0.225450    1.143966    0.673481    61.00000   -1.20000
H44B  2    0.222216    1.106648    0.756821    61.00000   -1.20000
AFIX   0
C35   1    0.270573    0.805763    0.438893    71.00000    0.03496    0.04363 =
         0.04520   -0.02182   -0.01412   -0.00153
AFIX  43
H35   2    0.241583    0.761565    0.457402    71.00000   -1.20000
AFIX   0
PART 0
C20   1    0.539485    0.385041    0.701792    11.00000    0.05902    0.03433 =
         0.04772    0.00173   -0.01467   -0.02094
AFIX 137
H20A  2    0.613350    0.344993    0.711122    11.00000   -1.50000
H20B  2    0.500688    0.362023    0.676180    11.00000   -1.50000
H20C  2    0.500166    0.394449    0.746483    11.00000   -1.50000
AFIX   0
PART 1
C36   1    0.274802    0.836450    0.364386    71.00000    0.04362    0.05760 =
         0.03805   -0.02356   -0.01693    0.00181
AFIX  43
H36   2    0.249852    0.812229    0.333676    71.00000   -1.20000
AFIX   0
PART 0
C49   1    0.273960    0.907556    0.937636    11.00000    0.06955    0.07445 =
         0.03728   -0.03230    0.00308   -0.01711
AFIX  23
H49A  2    0.353744    0.896188    0.934223    11.00000   -1.20000
H49B  2    0.239902    0.955559    0.961495    11.00000   -1.20000
AFIX   0
PART 1
C38   1    0.352837    0.938910    0.382610    71.00000    0.04128    0.05581 =
         0.03034   -0.01204   -0.00550   -0.00395
AFIX  43
H38   2    0.379021    0.984575    0.363747    71.00000   -1.20000
AFIX   0
C37   1    0.316062    0.902527    0.337129    71.00000    0.03874    0.06240 =
         0.03136   -0.01776   -0.00930    0.00588
AFIX  43
H37   2    0.319301    0.922964    0.287724    71.00000   -1.20000
AFIX   0
C43   1    0.382338    1.073071    0.712322    61.00000    0.04094    0.03029 =
         0.05023   -0.01791   -0.00119   -0.01232
AFIX  23
H43A  2    0.414708    1.082676    0.664114    61.00000   -1.20000
H43B  2    0.400780    1.106938    0.740318    61.00000   -1.20000
AFIX   0

F13   4    1.117273    0.914498    0.175203    21.00000    0.13698    0.06070 =
         0.09110    0.02044   -0.07397   -0.06646
F14   4    1.051697    0.848818    0.266923    21.00000    0.09950    0.15236 =
         0.05999   -0.04524   -0.00859   -0.07924
PART 0
H     2    0.505113    0.810892    0.567906    11.00000    0.04008

PART 2
F15A  4    1.164271    0.773384    0.232705   -21.00000    0.10715    0.04495 =
         0.10198    0.00910   -0.08501   -0.02804
F14A  4    1.053240    0.898520    0.229828   -21.00000    0.06876    0.09573 =
         0.12956   -0.08651   -0.02006   -0.01847
F13A  4    1.176592    0.874602    0.148910   -21.00000    0.07985    0.13092 =
         0.07077   -0.00715   -0.02200   -0.07627
F10A  4    0.353661    0.905882    0.127650   -31.00000    0.03828    0.05435 =
         0.14671   -0.01068    0.00541    0.01878
F11A  4    0.451760    0.937331    0.042755   -31.00000    0.12251    0.03638 =
         0.05249    0.01681   -0.00268    0.00600
F12A  4    0.481707    0.943104    0.147975   -31.00000    0.09797    0.06450 =
         0.12458   -0.06183   -0.07403    0.03526
F1A   4    0.652580    0.666867    0.500239   -41.00000    0.05111    0.08857 =
         0.03299   -0.00133    0.02122   -0.00073
F2A   4    0.554054    0.697243    0.410925   -41.00000    0.04200    0.17224 =
         0.08987   -0.10131    0.03621   -0.05828
F3A   4    0.616408    0.788078    0.434839   -41.00000    0.07594    0.02864 =
         0.09129   -0.01577    0.04909   -0.01048
F22A  4    0.885635    0.327222    0.174647   -51.00000    0.07523    0.03880 =
         0.06788    0.00084   -0.03216   -0.02271
F24A  4    1.053076    0.277064    0.199661   -51.00000    0.06172    0.03118 =
         0.10691   -0.02116   -0.01381    0.00301
F23A  4    0.935242    0.340064    0.270534   -51.00000    0.11508    0.03655 =
         0.04763    0.00123   -0.00764   -0.03000

C43A  1    0.335160    1.076312    0.743421   -61.00000    0.04743    0.03159 =
         0.05383   -0.01966   -0.00105   -0.01226
AFIX  23
H43C  2    0.294541    1.081932    0.788932   -61.00000   -1.20000
H43D  2    0.375775    1.116711    0.732300   -61.00000   -1.20000
AFIX   0
C44A  1    0.255969    1.094179    0.684794   -61.00000    0.04376    0.03263 =
         0.04161   -0.00049   -0.00600   -0.00718
AFIX  23
H44C  2    0.187417    1.140824    0.690421   -61.00000   -1.20000
H44D  2    0.289606    1.107757    0.637546   -61.00000   -1.20000
AFIX   0
C37A  1    0.293140    0.872358    0.341316   -71.00000    0.03791    0.04630 =
         0.02343   -0.01322   -0.00866    0.00507
AFIX  43
H37A  2    0.292546    0.886767    0.291404   -71.00000   -1.20000
AFIX   0
C36A  1    0.248256    0.810558    0.378206   -71.00000    0.04961    0.04322 =
         0.02989   -0.01559   -0.01405    0.00242
AFIX  43
H36A  2    0.217523    0.783950    0.352862   -71.00000   -1.20000
AFIX   0
C39A  1    0.339615    0.888871    0.452233   -71.00000    0.03364    0.04850 =
         0.02779   -0.01507   -0.00967   -0.00718
AFIX  43
H39A  2    0.371631    0.914452    0.477745   -71.00000   -1.20000
AFIX   0
C35A  1    0.248530    0.788004    0.451861   -71.00000    0.03931    0.03706 =
         0.02789   -0.01277   -0.01504   -0.00383
AFIX  43
H35A  2    0.218501    0.746266    0.476618   -71.00000   -1.20000
AFIX   0
C38A  1    0.338543    0.912652    0.377554   -71.00000    0.03827    0.05004 =
         0.02589   -0.00678   -0.00602   -0.00412
AFIX  43
H38A  2    0.367901    0.954821    0.352880   -71.00000   -1.20000
AFIX   0
C34A  1    0.294086    0.828330    0.488364   -71.00000    0.02161    0.03169 =
         0.02834   -0.01305   -0.00907    0.00439
HKLF 4

REM  083aim16.res in P-1
REM R1 =  0.0272 for   15179 Fo > 4sig(Fo)  and  0.0284 for all   15768 data
REM   1228 parameters refined using    723 restraints

END

WGHT      0.0373      2.1776

REM Highest difference peak  0.534,  deepest hole -0.476,  1-sigma level  0.047
Q1    1   0.5029  0.9493  0.0677  11.00000  0.05    0.53
Q2    1   0.6626  0.7189  0.4909  11.00000  0.05    0.51
Q3    1   0.4539  0.5702  0.1267  11.00000  0.05    0.49
Q4    1   1.2461  0.4289  0.0330  11.00000  0.05    0.47
Q5    1   1.1911  0.5801  0.0110  11.00000  0.05    0.45
Q6    1   1.1059  0.7944  0.2659  11.00000  0.05    0.43
Q7    1   0.5752  0.5565  0.0487  11.00000  0.05    0.43
Q8    1   1.1426  0.5318 -0.0306  11.00000  0.05    0.41
Q9    1   0.5788  0.7834  0.3944  11.00000  0.05    0.41
Q10   1   1.0025  0.8986 -0.0779  11.00000  0.05    0.40
Q11   1   1.2079  0.8175  0.1604  11.00000  0.05    0.36
Q12   1   0.3614  0.8986  0.0896  11.00000  0.05    0.34
Q13   1   0.8618  0.3609  0.2472  11.00000  0.05    0.30
Q14   1   0.3028  0.8236  0.5402  11.00000  0.05    0.30
Q15   1   0.5596  0.7914  0.6586  11.00000  0.05    0.29
Q16   1   0.6996  0.7596  0.6473  11.00000  0.05    0.29
Q17   1   0.3740  0.9195  0.6819  11.00000  0.05    0.28
Q18   1   0.6989  0.6927  0.4047  11.00000  0.05    0.28
Q19   1   0.8383  0.6592  0.2276  11.00000  0.05    0.28
Q20   1   0.4009  0.8338  0.5833  11.00000  0.05    0.26
;
_shelx_res_checksum               16434
_shelx_hkl_file
;
   0   0  -2  118.37    2.31
   0   0  -2  115.05    2.39
   0   0   3  963.69   13.37
   0   0  -3  966.32   13.17
   0   0  -3  948.34   13.38
   0   0  -4 4663.95   61.73
   0   0   4 4901.96   61.83
   0   0   5  163.71    4.36
   0   0  -5  172.91    4.48
   0   0  -6  109.71    3.73
   0   0  -6  101.37    3.66
   0   0   6  107.25    3.72
   0   0  -7   50.65    2.65
   0   0  -7   46.85    2.59
   0   0  -7   40.73    2.56
   0   0  -7   46.09    2.37
   0   0   7   43.85    2.57
   0   0   8  470.51    7.18
   0   0  -8  479.62   10.18
   0   0  -8  459.94   10.07
   0   0  -8  472.25    9.64
   0   0  -8  441.59   10.14
   0   0   8  444.63   10.07
   0   0  -9  893.30   15.91
   0   0  -9  885.36   16.80
   0   0  -9  916.04   16.65
   0   0   9  885.62   16.69
   0   0  -9  909.74   16.68
   0   0  10   17.34    2.17
   0   0 -10   18.41    1.92
   0   0 -10   19.03    2.32
   0   0 -10   16.01    2.04
   0   0 -10   19.49    2.29
   0   0 -11   15.29    2.19
   0   0  11   18.66    2.36
   0   0 -11   16.09    2.18
   0   0 -11   16.59    1.94
   0   0 -11   15.81    2.16
   0   0 -12    4.03    1.50
   0   0 -12    2.62    1.29
   0   0 -12    1.60    0.93
   0   0 -12    2.77    1.29
   0   0  13   16.68    2.46
   0   0 -13   21.55    2.76
   0   0 -13   18.12    2.67
   0   0  14    4.53    0.71
   0   0 -14    4.22    1.54
   0   0 -14    1.25    1.53
   0   0  14    1.13    0.48
   0   0 -14    1.15    1.48
   0   0  14    3.40    0.91
   0   0  14    2.23    1.35
   0   0  14    3.21    0.58
   0   0  15  252.09    5.41
   0   0  15  251.11    5.25
   0   0  15  218.66    8.49
   0   0 -15  247.06   10.02
   0   0  15  240.29    4.92
   0   0 -15  238.69    9.81
   0   0  15  237.57    9.97
   0   0 -15  247.70   10.01
   0   0  16   96.45    3.05
   0   0  16   95.51    6.33
   0   0  16   96.91    3.14
   0   0 -16   98.84    6.49
   0   0  16  101.29    2.87
   0   0  17   48.33    2.14
   0   0  17   47.49    1.89
   0   0 -17   45.72    4.48
   0   0  18  150.85    3.56
   0   0 -18  147.85    8.04
   0   0  18  152.72    3.93
   0   0 -18  149.67    3.97
   0   0  19   87.05    2.78
   0   0  19   84.53    2.83
   0   0 -19   87.08    2.81
   0   0 -19   78.66    5.62
   0   0  20    0.47    0.56
   0   0  20   -0.04    0.56
   0   0  20   -0.22    0.62
   0   0 -20    0.13    0.45
   0   0 -21   56.36    1.84
   0   0  21   54.87    1.87
   0   0  21   58.53    1.94
   0   0 -21   55.16    2.06
   0   0  21   55.88    1.95
   0   0 -22   43.70    1.61
   0   0 -22   44.33    1.79
   0   0  22   41.94    1.42
   0   0  22   43.52    1.49
   0   0  22   45.52    1.50
   0   0 -23   22.85    0.89
   0   0  23   21.80    0.77
   0   0  23   23.90    0.88
   0   1 -23   18.74    0.89
   0   1 -22    1.11    0.27
   0   1 -22    1.65    0.55
   0  -1  22    0.94    0.35
   0  -1  22    1.65    0.38
   0   1 -22    1.65    0.46
   0  -1  22    1.20    0.32
   0  -1  21   43.81    1.59
   0  -1  21   40.22    1.60
   0   1 -21   39.93    1.54
   0  -1  21   41.40    1.56
   0   1 -21   40.93    1.75
   0  -1  20  144.22    3.48
   0  -1  20  146.10    3.61
   0   1 -20  140.59    3.52
   0  -1  20  148.51    3.49
   0   1 -20  151.38    3.88
   0  -1  20  147.85    3.13
   0  -1  19   20.45    1.31
   0  -1  19   19.44    1.13
   0   1 -19   19.16    1.35
   0   1 -18   21.91    3.08
   0  -1  18   21.85    1.28
   0  -1  18   22.01    1.42
   0   1 -18   22.44    1.53
   0   1 -17  275.45    5.51
   0  -1  17  266.11    5.37
   0   1 -17  262.86    5.79
   0  -1  17  269.41    5.64
   0   1 -17  250.55   10.54
   0   1 -16  130.86    3.50
   0   1 -16  121.88    7.16
   0  -1  16  126.06    3.39
   0  -1  16  125.22    6.60
   0  -1  16  129.94    3.60
   0  -1  16  132.19    3.73
   0   1 -15    0.88    0.46
   0  -1  15    0.26    0.45
   0  -1  15    0.98    1.22
   0   1 -15   -0.24    1.37
   0  -1  15    0.06    0.58
   0   1 -15    2.84    1.09
   0  -1  15    3.01    0.65
   0  -1  15   -1.87    0.87
   0  -1  14   34.18    1.60
   0  -1  14   35.69    1.77
   0   1 -14   27.42    3.22
   0  -1  14   30.68    3.57
   0   1 -14   30.25    3.53
   0   1 -14   30.65    3.38
   0  -1  14   30.94    3.08
   0  -1  14   36.56    1.74
   0  -1  14   37.19    1.88
   0   1 -14   33.52    1.63
   0   1 -13   64.91    4.57
   0   1 -13   68.33    4.92
   0  -1  13   62.49    4.74
   0   1 -13   64.16    4.65
   0   1 -12   29.15    3.12
   0  -1  12   25.55    2.98
   0   1 -12   27.39    2.94
   0  -1  11  136.26    6.25
   0   1 -11  130.10    6.21
   0   1 -11  125.77    5.82
   0   1 -10  691.68   14.53
   0  -1  10  662.54   14.71
   0   1 -10  688.47   13.99
   0   1 -10  658.69   14.80
   0   1 -10  650.61   14.39
   0  -1   9   19.50    2.17
   0   1  -9   18.65    2.04
   0   1  -9   18.79    1.90
   0   1  -9   22.13    2.42
   0   1  -9   19.64    2.16
   0   1  -8  479.27   10.86
   0  -1   8  458.92   10.61
   0   1  -8  484.77   10.42
   0   1  -8  480.10   10.54
   0   1  -8  483.11   10.17
   0   1  -7   75.09    3.35
   0   1  -7   79.85    3.46
   0  -1   7   74.22    3.51
   0   1  -7   74.59    3.56
   0   1  -6 1183.20   18.25
   0  -1   6 1155.78   18.44
   0   1  -6 1213.02   18.37
   0   1  -6 1235.46   18.19
   0   1  -6 1149.33   18.59
   0  -1   5  529.77    9.64
   0   1  -5  520.07    9.69
   0   1  -5  536.63    9.44
   0   1  -4  495.00    8.28
   0   1  -4  481.98    8.53
   0   1  -3  131.42    3.08
   0  -1   3  135.78    2.52
   0  -1   3  128.01    3.19
   0  -1   2 2430.83   30.08
   0  -1   2 2532.27   30.80
   0   1  -2 2485.69   30.56
   0   1  -1 1095.95   14.54
   0  -1   1 1140.82   14.31
   0   1   2 1982.38   24.03
   0   1   2 1953.48   24.43
   0   1   3    6.16    0.58
   0   1   3    5.43    0.56
   0  -1  -3    7.89    0.62
   0   1   3    6.61    0.65
   0  -1  -3    9.14    0.67
   0   1   4  158.51    3.69
   0  -1  -4  164.62    3.65
   0  -1  -4  161.11    3.62
   0   1   4  158.66    3.65
   0  -1  -4  171.45    3.63
   0  -1  -5   18.65    1.21
   0   1   5   16.85    1.26
   0  -1  -6 2403.70   32.60
   0  -1  -6 2491.08   32.15
   0  -1  -7   54.21    2.53
   0  -1  -7   52.65    2.70
   0   1   7   49.84    2.62
   0  -1  -7   54.54    2.76
   0   1   8  189.66    5.78
   0  -1  -8  197.36    5.44
   0  -1  -8  184.54    5.79
   0  -1  -8  193.78    5.92
   0  -1  -9  612.47   12.75
   0  -1  -9  624.25   12.80
   0  -1  -9  603.19   11.81
   0  -1  -9  617.64   12.66
   0   1   9  623.67   12.63
   0  -1 -10  231.69    7.47
   0   1  10  223.89    7.29
   0  -1 -10  241.06    7.66
   0  -1 -10  238.95    7.46
   0  -1 -10  231.49    6.83
   0   1  11   87.02    4.66
   0  -1 -11   88.58    4.78
   0  -1 -11   88.94    4.70
   0  -1 -11   87.67    4.81
   0  -1 -11   92.43    4.28
   0   1  12  213.35    7.00
   0  -1 -12  205.57    7.79
   0  -1 -12  226.95    7.38
   0  -1 -12  215.38    8.09
   0  -1 -12  218.41    8.08
   0   1  12  221.79    8.08
   0   1  13   13.82    1.81
   0  -1 -13   12.97    2.25
   0   1  13   13.82    1.85
   0  -1 -13   12.35    1.86
   0  -1 -13   13.11    2.25
   0   1  13   12.49    2.03
   0  -1 -13   12.67    2.00
   0  -1 -14   42.09    3.95
   0   1  14   37.18    3.07
   0   1  14   38.39    3.09
   0   1  14   45.06    3.98
   0  -1 -14   40.70    3.74
   0   1  14   44.98    1.83
   0  -1 -15    3.68    1.81
   0  -1 -15    1.09    1.53
   0   1  15    0.87    1.18
   0   1  15    1.34    0.56
   0   1  15    2.34    0.87
   0  -1 -16  216.58    9.62
   0   1  16  220.47    4.96
   0  -1 -16  223.56    9.74
   0   1  16  219.33    9.57
   0   1  17   44.80    2.07
   0  -1 -17   39.05    4.24
   0  -1 -18    4.61    0.74
   0  -1 -18    5.32    1.73
   0   1  18    3.15    0.74
   0   1  18    5.72    0.87
   0  -1 -19    8.89    0.90
   0   1  19    8.32    0.93
   0   1  19    9.47    1.05
   0   1  19    8.05    0.98
   0  -1 -19    7.38    1.86
   0   1  20  149.58    3.75
   0  -1 -20  139.50    7.39
   0   1  20  144.58    3.61
   0   1  20  155.86    3.73
   0  -1 -20  148.25    3.56
   0   1  21   60.68    2.04
   0  -1 -21   59.96    2.14
   0   1  21   58.55    2.03
   0   1  21   56.98    1.96
   0   1  22   36.46    1.39
   0   1  22   34.71    1.32
   0  -1 -22   37.39    1.48
   0   1  22   34.70    1.38
   0  -1 -23   38.03    1.45
   0   1  23   41.06    1.25
   0   1  23   38.56    1.13
   0   2 -22   38.18    1.17
   0   2 -22   42.29    1.48
   0  -2  22   39.21    1.26
   0  -2  22   39.30    1.22
   0  -2  22   40.65    1.19
   0   2 -22   42.31    1.56
   0   2 -21    2.91    0.63
   0  -2  21    3.03    0.52
   0   2 -21    3.44    0.55
   0   2 -21    3.15    0.70
   0  -2  21    3.23    0.52
   0  -2  21    3.30    0.49
   0  -2  20   34.92    1.38
   0  -2  20   35.39    1.51
   0  -2  20   34.78    1.58
   0   2 -20   37.10    1.82
   0   2 -20   34.27    1.60
   0   2 -19   54.45    2.19
   0  -2  19   55.20    2.06
   0  -2  19   53.41    1.91
   0   2 -19   52.85    1.91
   0  -2  18   57.77    2.13
   0   2 -18   60.14    2.19
   0   2 -18   58.50    2.41
   0  -2  18   61.11    2.27
   0   2 -17   78.00    5.68
   0  -2  17   90.67    2.88
   0  -2  17   86.35    2.75
   0   2 -17   86.28    3.05
   0   2 -17   87.94    2.83
   0  -2  17   90.47    3.02
   0  -2  16  326.05    6.32
   0  -2  16  333.79    6.70
   0   2 -16  326.80    6.75
   0   2 -16  319.40   11.75
   0  -2  16  329.49    6.40
   0   2 -16  332.80    6.47
   0  -2  15  247.93    5.31
   0   2 -15  255.57   10.76
   0  -2  15  250.19    5.27
   0  -2  15  227.98    9.31
   0   2 -15  244.08   10.02
   0   2 -15  256.23    5.42
   0  -2  15  260.28    5.62
   0  -2  15  259.37   10.95
   0  -2  15  262.30    5.88
   0  -2  14   75.68    2.79
   0   2 -14   68.47    4.94
   0   2 -14   68.59    5.36
   0  -2  14   76.11    2.68
   0  -2  14   71.93    2.44
   0   2 -14   72.26    2.53
   0  -2  14   74.03    5.53
   0   2 -13   16.21    2.70
   0  -2  13   18.00    1.29
   0  -2  13   17.06    1.18
   0  -2  13   15.92    2.52
   0   2 -13   16.61    2.41
   0   2 -13   17.46    2.61
   0   2 -12   -0.05    1.21
   0   2 -12    1.82    1.36
   0   2 -12    0.92    1.18
   0  -2  11   98.55    5.48
   0   2 -11   98.21    5.27
   0   2 -11  108.31    5.82
   0   2 -10  174.22    6.62
   0   2 -10  165.12    6.89
   0  -2  10  167.94    6.88
   0  -2   9   21.40    1.59
   0   2  -9   16.30    1.95
   0  -2   9   18.31    2.23
   0   2  -9   16.70    2.19
   0  -2   8   21.96    2.28
   0   2  -8   20.48    2.07
   0   2  -8   21.39    2.04
   0   2  -8   20.74    2.08
   0   2  -8   19.46    2.26
   0   2  -7   27.76    2.13
   0   2  -7   28.05    2.39
   0  -2   7   25.96    2.21
   0   2  -7   26.72    2.12
   0   2  -7   27.03    2.06
   0   2  -6   75.23    3.48
   0   2  -6   80.17    3.27
   0   2  -6   73.36    3.14
   0  -2   6   74.19    3.31
   0   2  -6   80.95    3.30
   0   2  -5    9.80    1.23
   0   2  -5   11.80    1.16
   0   2  -5   11.36    1.14
   0   2  -5   11.98    1.15
   0   2  -4 1346.00   20.04
   0  -2   4 1378.47   18.35
   0   2  -4 1408.27   19.37
   0  -2   4 1355.06   19.74
   0   2  -3 3018.44   39.33
   0  -2   3 3052.68   38.94
   0  -2   2    4.40    0.58
   0   2  -2    6.30    0.76
   0  -2   1 2569.49   31.91
   0   2  -1 2512.36   32.49
   0  -2   0  954.22   11.82
   0   2   0  942.31   12.61
   0  -2  -1   54.96    1.69
   0   2   1   53.63    1.66
   0  -2  -2  888.67   11.53
   0   2   2  896.99   11.09
   0   2   2  860.54   12.25
   0   2   3  152.81    3.27
   0   2   3  162.51    2.62
   0   2   3  159.35    3.68
   0   2   3  160.57    3.07
   0  -2  -3  165.13    2.75
   0  -2  -4  155.75    3.49
   0  -2  -4  160.97    3.64
   0   2   4  142.56    3.40
   0   2   4  145.80    3.81
   0   2   4  152.80    3.38
   0   2   5  538.50    8.72
   0  -2  -5  514.50    8.69
   0  -2  -5  534.52    8.85
   0   2   5  506.70    8.69
   0   2   5  501.62    9.16
   0   2   6   36.99    1.92
   0  -2  -6   37.51    1.85
   0  -2  -6   37.76    1.93
   0  -2  -6   34.93    1.87
   0   2   6   34.71    1.87
   0  -2  -7  332.82    7.63
   0   2   7  338.37    7.31
   0  -2  -7  319.35    7.13
   0  -2  -7  337.83    7.08
   0  -2  -7  330.94    5.61
   0  -2  -8  274.04    6.67
   0   2   8  277.95    6.99
   0  -2  -8  283.01    6.63
   0  -2  -8  281.94    7.20
   0  -2  -8  291.87    7.41
   0   2   9  100.81    4.27
   0  -2  -9  103.58    4.06
   0  -2  -9  103.08    3.98
   0  -2  -9  103.95    4.43
   0  -2  -9  104.94    4.55
   0   2  10   77.11    3.66
   0  -2 -10   67.02    3.79
   0  -2 -10   75.32    3.56
   0  -2 -10   75.03    4.17
   0  -2 -10   75.84    3.99
   0   2  10   75.62    3.91
   0  -2 -11  164.46    5.78
   0   2  11  161.15    5.41
   0   2  11  162.64    6.30
   0  -2 -11  169.84    6.47
   0  -2 -11  165.14    6.43
   0  -2 -11  168.07    6.64
   0   2  11  168.51    5.89
   0  -2 -12    0.15    1.17
   0  -2 -12    0.74    0.99
   0   2  12   -1.73    0.71
   0   2  12    1.30    0.72
   0  -2 -12   -0.26    1.37
   0   2  12    1.91    1.00
   0  -2 -12    2.38    0.93
   0   2  13    4.39    1.01
   0  -2 -13    7.50    1.46
   0  -2 -13    3.99    1.64
   0  -2 -13    5.96    1.44
   0  -2 -13    4.89    1.60
   0   2  13    3.76    1.37
   0   2  13    2.98    0.95
   0  -2 -14   45.08    3.73
   0  -2 -14   37.70    3.71
   0  -2 -14   49.32    3.53
   0  -2 -14   40.09    3.89
   0   2  14   41.93    3.68
   0   2  14   41.99    1.83
   0   2  14   46.25    3.45
   0   2  15    2.24    0.57
   0   2  15    1.88    0.86
   0   2  15    0.78    0.79
   0  -2 -15    1.55    1.37
   0   2  16   31.03    3.41
   0   2  16   30.88    1.65
   0  -2 -16   29.51    3.54
   0  -2 -16   29.74    3.55
   0  -2 -17   67.74    5.39
   0   2  17   66.48    2.60
   0  -2 -17   64.20    5.40
   0   2  17   71.35    2.58
   0   2  18   27.76    1.67
   0   2  18   27.33    1.58
   0   2  18   28.89    1.66
   0  -2 -18   29.36    3.78
   0  -2 -19   24.39    1.40
   0   2  19   26.37    1.58
   0  -2 -19   28.84    3.67
   0   2  19   25.45    1.56
   0   2  19   24.24    1.47
   0   2  20    2.72    0.77
   0   2  20    2.08    0.57
   0   2  20    0.92    0.58
   0  -2 -20    3.38    1.35
   0   2  21   55.47    2.03
   0  -2 -21   55.94    2.06
   0   2  21   59.65    1.81
   0   2  21   59.28    2.06
   0   2  21   54.72    1.94
   0  -2 -22   61.08    1.89
   0   2  22   64.33    1.92
   0   2  22   59.43    1.87
   0   2  22   59.77    1.80
   0   2  23    1.50    0.34
   0  -2 -23    1.42    0.46
   0   2  23    1.71    0.30
   0  -3  22    4.62    0.39
   0   3 -22    6.02    0.56
   0   3 -22    5.56    0.55
   0   3 -22    5.30    0.52
   0  -3  22    5.11    0.39
   0   3 -21   77.60    2.37
   0   3 -21   80.55    2.35
   0  -3  21   74.81    2.05
   0   3 -21   78.96    2.11
   0  -3  21   77.86    1.79
   0  -3  21   74.75    2.00
   0  -3  21   77.00    1.87
   0  -3  20   25.44    1.19
   0   3 -20   25.26    1.50
   0  -3  20   24.70    1.15
   0  -3  20   24.28    1.28
   0   3 -20   25.31    1.34
   0   3 -20   26.64    1.52
   0   3 -19   11.12    1.05
   0  -3  19   11.41    0.94
   0   3 -19   12.75    1.23
   0  -3  19   11.12    0.93
   0   3 -19   11.85    0.92
   0   3 -18  142.75    3.90
   0  -3  18  137.18    3.52
   0   3 -18  147.57    3.66
   0  -3  18  139.67    3.53
   0  -3  18  141.39    3.76
   0  -3  17  174.91    4.21
   0  -3  17  180.04    4.49
   0   3 -17  177.99    4.30
   0   3 -17  172.51    8.20
   0   3 -17  181.58    4.60
   0  -3  17  177.62    4.20
   0   3 -16   34.46    3.69
   0  -3  16   35.38    1.76
   0  -3  16   35.00    1.78
   0   3 -16   34.29    1.81
   0   3 -16   35.71    1.99
   0  -3  16   35.34    1.90
   0  -3  15   36.93    2.03
   0  -3  15   33.50    1.84
   0   3 -15   31.41    1.83
   0  -3  15   32.48    1.70
   0   3 -15   29.67    3.74
   0  -3  15   27.82    3.21
   0   3 -15   31.03    1.72
   0   3 -15   27.19    3.31
   0  -3  15   32.16    1.66
   0  -3  14  145.88    3.99
   0   3 -14  137.28    7.87
   0   3 -14  133.67    3.67
   0  -3  14  130.92    7.57
   0  -3  14  129.19    3.52
   0  -3  14  138.02    3.85
   0   3 -14  128.28    6.82
   0   3 -13    1.11    1.15
   0  -3  13    3.19    0.69
   0  -3  13    1.72    0.54
   0  -3  13    3.61    0.63
   0   3 -13    1.82    0.51
   0   3 -13   -0.06    0.93
   0  -3  13   -0.37    1.24
   0  -3  12   98.52    6.04
   0   3 -12  101.68    6.17
   0   3 -12   95.04    5.30
   0   3 -11   90.55    5.54
   0   3 -11   97.41    5.32
   0   3 -11   85.47    4.76
   0  -3  11   93.40    5.61
   0   3 -10  557.39   13.40
   0   3 -10  567.39   14.31
   0  -3  10  574.66   14.06
   0   3 -10  558.50   12.86
   0   3  -9  338.81    9.31
   0   3  -9  334.71    9.90
   0  -3   9  321.95    9.56
   0  -3   9  328.03    7.92
   0   3  -8    1.45    1.19
   0  -3   8   -0.75    1.31
   0   3  -8    0.11    0.89
   0  -3   7  788.58   15.19
   0   3  -7  830.63   15.72
   0   3  -7  822.05   14.93
   0  -3   6    2.53    0.92
   0   3  -6    4.13    0.94
   0   3  -6    3.89    1.18
   0  -3   5  112.56    3.14
   0   3  -5  109.26    4.15
   0   3  -5  114.48    3.80
   0  -3   5  107.15    3.90
   0   3  -4   36.95    1.89
   0  -3   4   35.23    1.69
   0  -3   4   34.05    1.98
   0   3  -4   34.34    2.13
   0  -3   3  198.05    4.70
   0  -3   3  206.36    4.55
   0   3  -3  204.45    5.17
   0  -3   2    3.30    0.80
   0   3  -2    3.80    0.74
   0  -3   2    4.13    0.63
   0   3  -1 2180.14   27.59
   0  -3   1 2020.72   26.49
   0  -3   0 2860.94   35.54
   0   3   0 2684.54   33.56
   0   3   0 2651.30   35.08
   0  -3   0 2807.49   33.65
   0  -3  -1  405.58    6.94
   0   3   1  400.24    5.27
   0   3   2  879.20   12.93
   0   3   2  854.87   11.88
   0  -3  -2  890.95   13.10
   0   3   3  196.15    3.89
   0   3   3  189.20    4.51
   0  -3  -3  199.92    3.79
   0   3   3  193.34    3.29
   0  -3  -4  112.64    2.44
   0   3   4  104.35    2.54
   0   3   4  105.90    3.39
   0   3   4  105.26    2.86
   0   3   4  109.75    1.99
   0   3   5  380.44    7.87
   0   3   5  390.91    7.79
   0   3   5  394.01    6.87
   0   3   5  397.60    7.15
   0   3   5  405.70    6.03
   0  -3  -5  408.03    7.30
   0   3   6  186.10    5.12
   0  -3  -6  183.48    4.67
   0  -3  -6  170.08    4.46
   0   3   6  180.78    4.46
   0   3   6  176.18    4.84
   0   3   6  181.50    3.62
   0   3   6  187.55    4.42
   0  -3  -7  254.45    6.11
   0   3   7  248.44    6.49
   0   3   7  244.20    5.80
   0  -3  -7  238.61    5.87
   0  -3  -7  238.69    5.72
   0   3   7  262.83    6.34
   0   3   7  228.53    5.74
   0   3   7  252.91    4.98
   0   3   8  264.70    6.57
   0  -3  -8  272.89    6.48
   0   3   8  260.18    5.61
   0  -3  -8  266.50    7.11
   0  -3  -8  261.01    6.68
   0   3   8  281.61    6.93
   0   3   9    9.83    1.42
   0  -3  -9    9.88    1.27
   0   3   9   11.32    1.13
   0  -3  -9    9.38    1.16
   0   3   9   11.04    1.47
   0  -3  -9    9.58    1.47
   0  -3  -9    9.77    1.66
   0   3  10  471.09    9.29
   0  -3 -10  474.08   10.33
   0   3  10  469.82   10.60
   0  -3 -10  477.26   11.30
   0  -3 -10  458.31   10.00
   0  -3 -10  476.53   10.91
   0   3  10  468.45   10.54
   0  -3 -11   43.32    2.75
   0  -3 -11   42.76    3.17
   0   3  11   48.41    3.10
   0   3  11   38.55    2.96
   0  -3 -11   38.38    3.15
   0  -3 -11   38.69    2.92
   0   3  11   43.33    2.49
   0   3  12    5.41    1.26
   0   3  12    4.77    0.86
   0   3  12    6.71    1.37
   0  -3 -12    7.43    1.49
   0  -3 -12    5.54    1.33
   0  -3 -12    6.84    1.18
   0  -3 -12    5.38    1.54
   0   3  13  252.38    8.24
   0   3  13  248.47    8.65
   0  -3 -13  269.00    8.94
   0  -3 -13  239.17    8.74
   0  -3 -13  247.79    9.16
   0  -3 -13  272.11    8.10
   0   3  14  110.47    5.87
   0  -3 -14  108.80    6.31
   0  -3 -14  113.98    6.18
   0   3  14  112.69    3.09
   0   3  14  116.05    5.60
   0   3  15  147.73    3.89
   0   3  15  147.43    3.75
   0  -3 -15  145.63    7.36
   0   3  15  140.08    6.93
   0   3  15  155.87    6.75
   0  -3 -16   71.84    5.53
   0   3  16   68.83    2.63
   0   3  16   70.99    2.54
   0  -3 -16   62.87    5.05
   0   3  16   72.12    5.03
   0  -3 -17   42.19    4.25
   0  -3 -17   48.63    4.75
   0   3  17   47.59    2.11
   0   3  17   45.92    2.15
   0   3  17   45.11    2.06
   0  -3 -18   92.37    6.40
   0   3  18  100.38    3.12
   0   3  18   96.14    3.14
   0   3  18   97.43    3.08
   0   3  19    3.64    0.74
   0  -3 -19    2.63    1.91
   0   3  19    4.87    0.84
   0   3  19    5.47    0.82
   0  -3 -20  101.64    6.42
   0   3  20   98.53    2.91
   0   3  20  104.36    2.86
   0   3  20  107.35    3.05
   0   3  20  102.64    3.04
   0  -3 -21   18.22    1.13
   0   3  21   16.21    1.12
   0   3  21   15.13    0.95
   0   3  21   16.57    1.11
   0   3  21   15.36    1.03
   0   3  22   45.22    1.56
   0   3  22   45.71    1.42
   0   3  22   44.60    1.62
   0   3  22   49.70    1.67
   0  -3 -23   41.82    1.54
   0   3  23   41.01    1.33
   0  -4  21    1.22    0.27
   0  -4  21    1.02    0.31
   0   4 -21    2.24    0.49
   0  -4  21    0.97    0.31
   0   4 -21    1.33    0.39
   0   4 -21    1.31    0.48
   0  -4  20   26.44    1.17
   0   4 -20   28.78    1.49
   0  -4  20   26.51    1.26
   0   4 -20   27.42    1.16
   0   4 -20   27.25    1.34
   0   4 -20   25.13    1.41
   0  -4  20   28.01    1.11
   0  -4  19   37.08    1.58
   0   4 -19   37.42    1.90
   0   4 -19   35.37    1.53
   0  -4  19   40.13    1.53
   0   4 -19   37.02    1.88
   0   4 -19   39.09    1.79
   0   4 -18   27.47    1.49
   0   4 -18   29.50    1.72
   0   4 -18   28.79    1.82
   0  -4  18   27.54    1.58
   0  -4  18   27.67    1.51
   0  -4  18   25.71    1.35
   0   4 -17   26.10    1.75
   0  -4  17   28.55    1.60
   0   4 -17   27.75    1.64
   0  -4  17   26.70    1.45
   0  -4  17   27.22    1.65
   0  -4  16  193.20    4.91
   0   4 -16  185.24    4.56
   0   4 -16  177.58    8.13
   0  -4  16  188.14    4.50
   0   4 -16  187.98    4.81
   0  -4  16  191.09    4.37
   0  -4  16  190.31    4.74
   0  -4  15    5.22    0.79
   0  -4  15    4.82    0.96
   0  -4  15    5.60    0.90
   0  -4  15    4.97    0.82
   0   4 -15    5.48    1.66
   0   4 -15    4.97    0.91
   0   4 -15    5.05    0.86
   0  -4  14  113.23    7.17
   0  -4  14  115.13    3.53
   0  -4  14  117.85    3.66
   0   4 -14  111.23    6.24
   0   4 -14  112.12    3.57
   0   4 -14  121.94    3.33
   0   4 -14  112.63    3.42
   0  -4  14  111.01    3.31
   0   4 -14  120.73    7.48
   0   4 -13    6.32    1.61
   0  -4  13    5.45    1.49
   0  -4  13    5.97    0.84
   0   4 -13    5.94    0.82
   0  -4  13    6.41    0.89
   0   4 -13    7.66    0.81
   0   4 -13    5.39    0.71
   0  -4  13    5.57    0.79
   0  -4  13    6.90    0.92
   0   4 -13    6.72    1.98
   0  -4  12   43.99    4.13
   0  -4  12   44.69    1.86
   0  -4  12   47.10    1.94
   0   4 -12   43.95    4.23
   0  -4  12   48.58    2.12
   0  -4  12   48.25    2.11
   0   4 -12   48.23    3.76
   0  -4  12   45.34    2.04
   0   4 -12   43.99    1.93
   0   4 -11   23.22    3.02
   0   4 -11   24.71    2.56
   0  -4  11   23.98    3.02
   0  -4  10   72.65    4.75
   0   4 -10   75.69    4.21
   0   4 -10   70.61    4.79
   0  -4   9   14.58    2.22
   0   4  -9   13.63    2.26
   0  -4   9   13.22    1.63
   0   4  -9   14.47    1.80
   0   4  -8   79.59    4.60
   0   4  -8   81.49    4.18
   0   4  -8   85.40    3.92
   0  -4   8   82.15    4.45
   0   4  -7   41.17    2.52
   0   4  -7   42.44    3.21
   0   4  -7   38.08    2.66
   0  -4   7   37.28    2.86
   0   4  -6  156.54    5.80
   0  -4   6  159.86    5.52
   0  -4   6  165.55    4.37
   0   4  -6  158.96    5.21
   0   4  -6  168.94    4.87
   0   4  -5  917.59   16.38
   0  -4   5  935.67   14.54
   0  -4   5  906.84   15.65
   0  -4   5  955.47   15.68
   0   4  -4  765.02   13.73
   0  -4   4  756.27   14.24
   0  -4   4  754.74   12.56
   0  -4   4  784.77   13.08
   0  -4   3   12.27    1.19
   0   4  -3   13.99    1.43
   0  -4   3   13.06    1.15
   0  -4   3   15.38    1.56
   0  -4   2  266.44    5.39
   0   4  -2  261.29    6.14
   0  -4   2  260.08    6.54
   0  -4   1  606.48    9.32
   0   4  -1  620.12   10.44
   0   4   0   69.03    2.67
   0   4   0   74.02    1.79
   0  -4   0   76.58    2.94
   0   4   1   39.60    1.96
   0   4   1   42.98    1.02
   0  -4  -2  606.90   10.33
   0  -4  -2  612.35    9.37
   0   4   2  583.32   10.16
   0   4   3   78.98    1.52
   0  -4  -3   79.36    2.53
   0   4   3   82.61    3.00
   0  -4  -3   85.77    3.19
   0   4   3   86.29    2.40
   0   4   4  119.22    3.13
   0   4   4  110.88    2.39
   0   4   4  110.52    3.68
   0  -4  -4  109.26    2.90
   0  -4  -5  152.22    3.37
   0   4   5  154.74    2.49
   0   4   5  156.04    4.70
   0   4   5  159.86    3.45
   0   4   5  158.61    3.93
   0   4   5  156.03    4.56
   0   4   6    5.05    0.78
   0   4   6    4.39    0.96
   0   4   6    5.53    0.72
   0  -4  -6    4.85    0.73
   0   4   6    6.62    1.09
   0   4   7  246.43    6.31
   0  -4  -7  229.20    5.62
   0   4   7  232.36    4.13
   0   4   7  225.00    5.44
   0   4   7  227.04    6.34
   0  -4  -7  230.39    5.88
   0   4   7  226.76    5.27
   0   4   8  304.97    5.55
   0  -4  -8  305.04    7.64
   0   4   8  301.77    6.85
   0  -4  -8  287.23    7.00
   0   4   8  279.33    7.74
   0   4   8  274.25    6.76
   0   4   8  304.71    7.61
   0  -4  -8  296.65    6.84
   0  -4  -8  291.01    7.28
   0  -4  -9  319.21    7.65
   0   4   9  334.35    8.36
   0   4   9  334.61    6.38
   0   4   9  322.48    7.74
   0  -4  -9  325.69    8.18
   0  -4  -9  323.89    8.47
   0   4  10  185.51    5.95
   0  -4 -10  180.53    6.50
   0  -4 -10  186.48    5.82
   0  -4 -10  201.15    6.41
   0   4  10  189.17    6.25
   0  -4 -10  181.03    5.58
   0  -4 -11  118.23    4.80
   0   4  11  113.77    4.86
   0   4  11  108.95    4.92
   0  -4 -11  120.59    5.16
   0  -4 -11  116.44    5.20
   0  -4 -11  115.25    5.45
   0  -4 -11  115.35    4.60
   0  -4 -12  395.69   11.27
   0   4  12  385.90   10.40
   0  -4 -12  427.63   10.86
   0   4  12  403.81   10.45
   0  -4 -12  383.18   10.76
   0   4  13    1.60    0.77
   0  -4 -13    1.61    1.20
   0  -4 -13    2.93    1.23
   0   4  13    2.46    1.04
   0   4  14  110.03    3.09
   0   4  14  118.12    5.79
   0   4  14  113.81    5.66
   0  -4 -14  116.96    6.46
   0   4  14  106.79    3.02
   0   4  14  113.92    3.22
   0  -4 -14  101.95    5.81
   0   4  15   39.53    1.85
   0   4  15   42.52    3.60
   0  -4 -15   36.31    3.64
   0   4  15   36.81    3.29
   0  -4 -15   41.21    4.10
   0   4  15   42.44    1.86
   0   4  15   42.28    1.95
   0   4  15   39.98    1.84
   0  -4 -16  147.75    7.57
   0   4  16  160.47    4.05
   0   4  16  163.01    4.21
   0  -4 -16  168.51    8.40
   0   4  16  161.45    4.06
   0   4  16  160.56    7.12
   0   4  16  159.97    4.11
   0  -4 -17  187.57    8.73
   0  -4 -17  197.54    9.42
   0   4  17  190.32    4.55
   0   4  17  190.69    4.60
   0   4  17  190.90    4.72
   0   4  17  201.98    4.36
   0  -4 -18    0.45    1.57
   0   4  18    0.41    0.37
   0   4  18    0.03    0.68
   0   4  18    0.23    0.62
   0   4  18    0.24    0.64
   0   4  19   13.45    1.13
   0   4  19   13.75    1.19
   0   4  19   15.52    1.21
   0  -4 -19   14.90    2.82
   0  -4 -20  201.48    9.13
   0   4  20  199.47    4.42
   0   4  20  202.33    4.34
   0   4  20  199.82    4.52
   0   4  20  204.89    4.46
   0   4  21  105.52    2.88
   0   4  21  103.38    2.77
   0   4  21  104.87    2.70
   0   4  21  109.70    2.88
   0   4  22    9.72    0.74
   0   4  22   10.34    0.82
   0   4  22    9.71    0.70
   0   4  23    1.88    0.28
   0   4  23    1.46    0.36
   0  -4 -23    0.81    0.37
   0   5 -21   61.50    1.59
   0  -5  21   59.88    1.47
   0  -5  21   59.61    1.45
   0   5 -20   22.29    1.22
   0   5 -20   20.77    1.12
   0  -5  20   19.01    1.01
   0   5 -20   20.12    1.13
   0  -5  20   19.94    0.97
   0   5 -19   59.34    2.19
   0   5 -19   58.42    1.95
   0   5 -19   63.61    2.29
   0   5 -19   60.51    2.16
   0  -5  19   58.82    1.68
   0  -5  19   59.22    1.95
   0   5 -18  225.87    4.98
   0   5 -18  213.41    4.65
   0   5 -18  231.60    5.14
   0  -5  18  221.71    4.76
   0  -5  18  227.94    4.66
   0   5 -18  218.36    5.02
   0  -5  18  222.12    4.27
   0  -5  17   23.50    1.28
   0   5 -17   23.54    1.48
   0   5 -17   24.17    1.65
   0   5 -17   26.06    1.69
   0   5 -17   23.71    1.69
   0  -5  17   25.90    1.53
   0  -5  17   25.32    1.56
   0  -5  16   14.38    1.27
   0  -5  16   13.60    1.23
   0   5 -16   13.99    1.27
   0   5 -16   14.49    1.09
   0  -5  16   13.24    1.07
   0  -5  16   12.84    1.31
   0   5 -16   14.03    1.39
   0  -5  15  276.71    5.54
   0  -5  15  282.18    5.90
   0  -5  15  290.18    6.23
   0  -5  15  289.94    6.28
   0   5 -15  279.85    6.25
   0   5 -15  294.24    5.81
   0   5 -15  279.33    5.99
   0  -5  14   25.16    1.66
   0   5 -14   20.89    1.55
   0  -5  14   22.21    1.49
   0   5 -14   23.03    1.55
   0  -5  14   22.33    1.31
   0   5 -14   25.21    1.49
   0  -5  14   22.71    1.60
   0  -5  13   15.41    1.30
   0   5 -13   14.22    1.22
   0   5 -13   17.19    1.23
   0  -5  13   15.22    1.31
   0   5 -13   14.94    2.87
   0  -5  13   13.55    1.14
   0  -5  13   14.66    1.29
   0   5 -13   13.92    1.28
   0  -5  13   14.82    2.80
   0   5 -13   15.57    2.24
   0   5 -12   46.03    1.93
   0   5 -12   42.84    2.01
   0  -5  12   42.51    1.90
   0  -5  12   44.96    2.10
   0   5 -12   43.66    1.87
   0   5 -12   46.33    3.59
   0  -5  12   42.99    2.09
   0   5 -12   45.42    4.44
   0   5 -12   43.08    1.89
   0  -5  12   43.22    2.06
   0   5 -12   43.95    1.99
   0  -5  12   44.59    4.29
   0   5 -11   34.17    2.92
   0  -5  11   32.50    3.44
   0   5 -11   33.57    3.78
   0   5 -10    9.33    2.20
   0   5 -10    9.21    1.45
   0  -5  10    7.19    1.34
   0  -5  10    5.65    1.49
   0   5  -9  203.70    6.63
   0  -5   9  180.78    7.42
   0  -5   9  177.04    6.54
   0   5  -9  185.74    7.87
   0   5  -8  661.28   12.96
   0   5  -8  645.61   15.12
   0  -5   8  631.73   14.36
   0  -5   7   73.20    4.06
   0   5  -7   73.31    3.36
   0   5  -7   63.25    4.11
   0   5  -6   18.01    1.50
   0  -5   6   16.01    1.86
   0  -5   6   11.98    1.38
   0  -5   6   15.09    1.43
   0   5  -6   14.51    2.07
   0  -5   5   26.55    2.00
   0  -5   5   24.08    2.04
   0   5  -5   25.16    2.43
   0  -5   5   23.47    1.98
   0  -5   5   25.32    1.88
   0  -5   4   11.92    1.36
   0  -5   4   13.86    1.41
   0  -5   4   10.43    1.67
   0   5  -4   12.99    1.79
   0  -5   4   10.68    1.28
   0  -5   3  622.23   12.82
   0   5  -3  623.16   11.89
   0  -5   3  604.26   10.82
   0  -5   3  617.97   11.41
   0  -5   2   53.39    3.06
   0  -5   2   52.85    3.07
   0   5  -2   48.79    2.60
   0  -5   2   45.13    2.06
   0  -5   2   59.46    3.26
   0  -5   1  158.46    5.15
   0   5  -1  151.13    4.64
   0  -5   1  153.16    3.62
   0   5  -1  144.56    3.45
   0  -5   0  751.50   13.58
   0   5   0  741.30   10.41
   0   5   0  740.82   12.69
   0  -5   0  764.40   13.69
   0  -5  -1  414.03    8.52
   0   5   1  407.69    8.05
   0  -5  -2  272.24    6.68
   0   5   2  266.32    6.29
   0  -5  -2  280.24    5.45
   0  -5  -2  264.99    6.38
   0  -5  -3   70.72    2.58
   0  -5  -3   69.41    3.10
   0   5   3   70.53    2.97
   0   5   3   58.79    2.14
   0  -5  -3   67.78    2.65
   0   5   3   59.24    2.74
   0  -5  -4 1446.68   20.69
   0  -5  -4 1385.39   18.85
   0   5   4 1231.93   16.18
   0   5   4 1383.00   18.31
   0   5   4 1284.38   19.84
   0   5   4 1392.42   20.22
   0  -5  -5  122.32    3.43
   0   5   5  127.90    4.42
   0   5   5  128.11    2.75
   0   5   5  130.95    4.50
   0   5   5  125.95    3.54
   0   5   6   13.01    1.15
   0   5   6   12.61    1.51
   0   5   6   14.93    1.00
   0   5   6    9.77    1.41
   0  -5  -6   12.67    0.98
   0  -5  -7   83.03    3.24
   0   5   7   84.08    2.82
   0   5   7   83.63    3.12
   0   5   7   81.35    3.70
   0   5   7   79.79    3.83
   0   5   8  648.84   13.33
   0   5   8  668.22   11.26
   0  -5  -8  647.69   12.46
   0  -5  -8  639.76   11.90
   0   5   8  617.86   11.50
   0   5   8  667.90   13.05
   0  -5  -9  235.73    6.26
   0  -5  -9  221.83    6.65
   0   5   9  221.75    7.25
   0   5   9  229.27    7.00
   0   5   9  237.64    6.08
   0  -5  -9  217.18    6.81
   0  -5  -9  219.06    6.25
   0   5  10   18.59    1.77
   0   5  10   19.60    2.05
   0  -5 -10   15.34    1.57
   0  -5 -10   18.11    1.96
   0  -5 -10   15.84    1.92
   0  -5 -11  369.03    9.41
   0  -5 -11  319.63    9.61
   0   5  11  355.74    8.84
   0  -5 -11  349.64    8.78
   0   5  11  327.59    9.39
   0   5  12   14.09    1.74
   0   5  12   16.74    2.04
   0  -5 -12   13.74    1.91
   0  -5 -12   14.62    2.14
   0  -5 -13    6.50    1.51
   0   5  13    5.12    1.09
   0  -5 -13    5.14    1.44
   0   5  13    5.15    1.29
   0   5  14  259.64    5.59
   0   5  14  283.25    5.49
   0  -5 -14  275.77   10.21
   0   5  14  284.01    9.43
   0   5  14  288.95    5.77
   0  -5 -14  267.81    9.58
   0   5  14  281.02    5.77
   0   5  14  286.95    5.63
   0   5  15    7.75    0.93
   0   5  15    8.29    0.87
   0  -5 -15    8.52    2.14
   0   5  15    9.24    1.62
   0   5  15    8.57    0.91
   0  -5 -15    7.38    1.83
   0   5  15    7.88    0.90
   0   5  16   10.62    1.01
   0   5  16   10.70    1.05
   0  -5 -16   10.31    2.34
   0  -5 -16   11.37    2.26
   0   5  16   13.94    2.23
   0   5  16   11.00    0.95
   0   5  16   10.73    1.05
   0   5  16   10.04    1.05
   0   5  17   44.37    2.09
   0   5  17   46.97    2.08
   0   5  17   48.64    1.94
   0  -5 -17   50.82    4.42
   0   5  17   45.63    2.02
   0  -5 -17   45.49    4.46
   0  -5 -18  204.25    9.94
   0   5  18  197.97    4.58
   0  -5 -18  193.86    9.39
   0   5  18  197.74    4.65
   0   5  18  193.22    4.73
   0   5  18  205.56    4.37
   0   5  19   86.57    2.87
   0  -5 -19   84.36    6.01
   0   5  19   85.06    2.75
   0   5  19   87.11    2.77
   0   5  19   86.78    2.48
   0   5  19   86.80    2.77
   0   5  20   11.33    1.01
   0   5  20   11.62    1.04
   0   5  20   10.78    0.96
   0   5  20   11.74    0.99
   0  -5 -20    8.04    1.97
   0   5  21   40.90    1.65
   0   5  21   39.66    1.59
   0   5  21   39.41    1.60
   0   5  22   29.66    1.22
   0   5  22   31.21    1.29
   0   5  23   52.86    1.50
   0   5  23   52.52    1.36
   0  -5 -23   55.06    1.65
   0   6 -20   71.68    2.02
   0  -6  20   68.51    1.78
   0  -6  20   72.83    1.78
   0   6 -20   71.95    1.94
   0   6 -19  152.99    3.48
   0   6 -19  164.29    3.71
   0   6 -19  161.73    3.41
   0  -6  19  169.30    3.42
   0   6 -19  161.05    3.63
   0   6 -18   20.32    1.31
   0   6 -18   21.69    1.44
   0   6 -18   23.00    1.46
   0  -6  18   23.10    1.35
   0   6 -18   22.64    1.32
   0  -6  18   22.61    1.33
   0  -6  17   94.31    2.97
   0   6 -17   98.12    3.17
   0   6 -17   91.58    3.02
   0   6 -17   93.47    3.11
   0   6 -17   97.35    2.98
   0  -6  17  104.10    3.00
   0  -6  16   61.80    2.50
   0  -6  16   64.04    2.59
   0   6 -16   60.77    2.59
   0  -6  16   64.57    2.46
   0   6 -16   61.61    2.58
   0   6 -16   58.36    2.50
   0   6 -16   62.43    2.49
   0   6 -16   63.30    2.24
   0  -6  15   52.88    2.40
   0  -6  15   54.03    2.29
   0   6 -15   52.54    2.33
   0  -6  15   52.30    2.37
   0   6 -15   51.00    2.41
   0   6 -15   52.77    2.15
   0   6 -15   49.16    2.36
   0   6 -14    5.39    0.97
   0  -6  14    4.92    0.91
   0  -6  14    5.87    0.95
   0   6 -14    5.24    1.03
   0  -6  14    5.60    0.94
   0   6 -14    6.81    0.85
   0  -6  13  142.40    4.13
   0  -6  13  147.94    4.22
   0  -6  13  154.56    4.31
   0   6 -13  150.54    4.11
   0   6 -13  146.11    4.19
   0   6 -13  130.91    7.59
   0  -6  13  148.94    3.97
   0   6 -13  151.46    3.91
   0   6 -13  142.68    8.28
   0   6 -12   32.16    3.71
   0  -6  12   36.20    3.90
   0  -6  12   36.81    1.82
   0   6 -12   37.57    1.79
   0   6 -12   37.35    1.83
   0  -6  12   37.74    1.97
   0   6 -12   39.84    1.79
   0  -6  12   40.21    2.03
   0   6 -12   37.73    1.94
   0  -6  12   36.45    1.98
   0   6 -12   36.09    4.07
   0   6 -12   37.78    1.97
   0  -6  11   17.56    2.71
   0   6 -11   15.57    1.21
   0   6 -11   14.90    1.17
   0  -6  11   16.10    1.26
   0   6 -11   13.92    1.06
   0   6 -11   15.03    2.82
   0  -6  11   12.06    1.02
   0  -6  11   14.00    1.19
   0  -6  11   14.12    1.22
   0   6 -11   13.64    1.07
   0   6 -11   14.04    1.17
   0  -6  11   14.07    1.17
   0   6 -10   69.88    5.17
   0  -6  10   67.79    4.82
   0  -6  10   67.02    4.26
   0   6  -9   54.57    4.39
   0  -6   9   59.19    4.24
   0  -6   9   61.64    4.06
   0   6  -8    1.22    1.22
   0  -6   8    1.07    0.91
   0  -6   8    0.33    1.03
   0  -6   7  174.84    6.55
   0  -6   7  159.57    6.44
   0   6  -7  184.48    7.32
   0   6  -6   47.84    3.54
   0  -6   6   48.04    2.79
   0  -6   6   44.79    2.93
   0  -6   6   44.35    3.07
   0  -6   5    3.06    1.31
   0  -6   5    3.28    0.97
   0   6  -5    4.76    1.46
   0  -6   5    3.01    0.81
   0  -6   5    2.10    0.85
   0  -6   5    2.57    0.81
   0  -6   4   58.77    3.93
   0  -6   4   53.63    2.85
   0   6  -4   56.13    3.48
   0  -6   4   56.37    2.96
   0  -6   4   53.53    3.08
   0   6  -3   16.99    2.01
   0  -6   3   15.96    1.80
   0  -6   3   15.93    2.17
   0  -6   3   15.74    1.48
   0  -6   3   15.46    1.57
   0  -6   2  972.88   18.32
   0  -6   2  962.84   17.94
   0   6  -2  969.41   14.70
   0  -6   2 1015.12   15.13
   0   6  -2  949.18   16.86
   0  -6   2  983.36   18.33
   0   6  -1   22.07    1.96
   0  -6   1   18.77    2.08
   0  -6   1   16.31    2.04
   0   6   0   17.49    0.92
   0   6   0   13.29    1.51
   0  -6   0   16.14    1.89
   0  -6   0   13.30    1.72
   0   6   1 1487.59   21.92
   0  -6  -1 1541.14   23.40
   0  -6  -1 1484.53   22.65
   0  -6  -2  590.00   11.20
   0   6   2  609.37   11.44
   0  -6  -2  592.67   11.91
   0   6   3    6.30    0.77
   0   6   3    8.19    1.25
   0  -6  -3    9.02    1.21
   0  -6  -3    8.16    1.30
   0  -6  -3    7.89    1.35
   0  -6  -3   10.04    1.07
   0  -6  -4  187.92    5.18
   0  -6  -4  194.21    5.28
   0   6   4  195.20    5.83
   0   6   4  198.06    4.63
   0  -6  -4  196.99    6.05
   0   6   5  415.19    7.78
   0   6   5  410.01    9.37
   0  -6  -5  434.24    9.90
   0  -6  -5  397.80    8.08
   0   6   5  421.98    9.47
   0   6   6  816.87   14.89
   0  -6  -6  792.44   12.67
   0  -6  -6  782.66   15.31
   0   6   6  780.40   14.81
   0   6   6  785.56   12.74
   0   6   7    2.53    0.49
   0   6   7    1.70    0.61
   0   6   7    2.18    1.09
   0   6   7    3.33    1.16
   0  -6  -7    1.90    0.54
   0   6   8  338.84    7.53
   0   6   8  359.06    6.89
   0   6   8  349.58    9.34
   0  -6  -8  351.07    8.03
   0  -6  -8  327.53    8.46
   0   6   8  355.76    9.18
   0   6   9  561.72   12.98
   0   6   9  556.44   10.82
   0  -6  -9  558.78   12.06
   0   6   9  585.24   12.67
   0  -6  -9  546.64   12.06
   0  -6  -9  581.37   11.39
   0  -6 -10   45.29    2.73
   0  -6 -10   47.98    3.20
   0   6  10   48.83    3.36
   0  -6 -10   45.88    2.81
   0  -6 -10   40.58    3.02
   0   6  10   43.64    3.40
   0  -6 -11  179.19    6.70
   0   6  11  186.03    6.97
   0  -6 -11  171.32    6.86
   0  -6 -12   57.05    3.75
   0  -6 -12   55.60    4.02
   0   6  12   56.41    3.89
   0  -6 -13   15.84    2.28
   0   6  13   17.62    2.28
   0  -6 -13   18.16    2.35
   0   6  14  356.63    6.87
   0  -6 -14  345.79   10.91
   0   6  14  361.78    6.79
   0   6  14  369.35   11.19
   0   6  14  349.55    6.39
   0   6  14  362.54    6.52
   0  -6 -14  356.91   11.73
   0   6  14  353.28    6.61
   0   6  14  341.17    6.67
   0   6  14  333.61    6.75
   0   6  14  348.67    6.50
   0   6  15  176.96    4.43
   0   6  15  190.40    7.94
   0  -6 -15  169.37    8.28
   0   6  15  193.23    4.33
   0   6  15  182.71    4.38
   0  -6 -15  193.22    8.15
   0   6  15  177.63    4.52
   0   6  15  179.96    4.22
   0   6  15  180.58    4.47
   0   6  15  191.78    4.62
   0   6  16  201.69    4.84
   0   6  16  202.59    4.52
   0  -6 -16  187.66    9.00
   0  -6 -16  203.82    8.61
   0   6  16  195.52    4.78
   0   6  16  200.12    4.54
   0   6  16  198.54    4.81
   0   6  16  201.14    4.72
   0   6  16  194.95    8.19
   0   6  17   85.23    2.85
   0   6  17   86.54    2.95
   0   6  17   84.53    2.95
   0   6  17   87.26    2.80
   0  -6 -17   76.97    5.85
   0   6  17   85.80    2.69
   0  -6 -17   88.33    6.54
   0  -6 -17   82.02    5.49
   0  -6 -18   90.94    6.63
   0   6  18   88.56    2.88
   0  -6 -18   92.34    6.33
   0   6  18   92.27    2.86
   0   6  18   90.68    3.03
   0   6  18   93.49    2.73
   0   6  19   42.68    1.92
   0   6  19   43.47    1.70
   0   6  19   40.10    1.91
   0   6  19   41.13    1.83
   0   6  19   40.31    1.85
   0  -6 -19   38.50    4.04
   0  -6 -20  153.18    7.78
   0   6  20  161.56    3.77
   0   6  20  159.60    3.69
   0   6  20  156.90    3.36
   0   6  20  153.04    3.68
   0   6  21    2.25    0.54
   0   6  21    2.64    0.52
   0   6  22   -0.70    0.45
   0   6  22    0.14    0.36
   0   6  23    7.43    0.52
   0   6  23    7.92    0.56
   0  -7  20    2.76    0.34
   0   7 -20    3.10    0.41
   0   7 -20    2.94    0.40
   0   7 -19   73.06    2.12
   0   7 -19   74.13    2.13
   0  -7  19   73.42    1.96
   0   7 -18  150.25    3.57
   0  -7  18  147.93    3.40
   0  -7  18  153.73    3.39
   0   7 -18  141.81    3.27
   0   7 -18  146.08    3.39
   0   7 -18  151.84    3.57
   0   7 -17   47.21    1.69
   0   7 -17   45.67    2.05
   0  -7  17   46.82    1.97
   0   7 -17   49.82    2.12
   0  -7  17   51.23    2.01
   0   7 -17   46.43    1.91
   0   7 -17   48.69    1.99
   0  -7  16   68.42    2.58
   0   7 -16   68.22    2.66
   0   7 -16   65.20    2.56
   0   7 -16   65.42    2.48
   0  -7  16   69.34    2.48
   0   7 -16   63.36    2.20
   0   7 -16   63.31    2.40
   0  -7  16   65.78    2.51
   0   7 -15  110.01    3.39
   0   7 -15  116.45    3.66
   0   7 -15  111.71    3.55
   0  -7  15  114.60    3.55
   0   7 -15  119.83    3.32
   0   7 -15  117.02    3.52
   0  -7  15  119.71    3.49
   0  -7  15  119.81    3.62
   0  -7  14   61.07    2.59
   0   7 -14   55.40    2.47
   0   7 -14   59.99    2.61
   0  -7  14   66.57    2.57
   0   7 -14   61.22    2.38
   0   7 -14   59.61    2.53
   0  -7  14   62.11    2.65
   0   7 -14   57.65    2.42
   0   7 -13   16.13    1.27
   0   7 -13   18.00    1.54
   0   7 -13   16.47    1.45
   0   7 -13   16.50    1.29
   0  -7  13   17.45    1.50
   0  -7  13   16.40    1.34
   0   7 -13   16.29    1.43
   0   7 -13   17.49    1.23
   0  -7  13   17.34    1.47
   0  -7  13   19.68    1.53
   0  -7  12  286.37    6.31
   0   7 -12  284.60    5.86
   0   7 -12  295.04    6.04
   0  -7  12  287.79    6.37
   0  -7  12  285.28    6.20
   0   7 -12  262.28   10.73
   0   7 -12  285.14    6.15
   0   7 -12  288.79    5.82
   0  -7  12  279.27    5.92
   0   7 -12  277.78    6.19
   0   7 -11   65.31    2.56
   0   7 -11   63.33    2.36
   0  -7  11   60.85    2.49
   0  -7  11   65.27    2.60
   0  -7  11   58.73    2.34
   0   7 -11   66.09    2.54
   0  -7  11   66.08    2.71
   0   7 -11   53.15    4.50
   0   7 -11   65.06    2.47
   0  -7  11   64.73    2.46
   0   7 -11   63.54    2.37
   0  -7  11   62.20    2.64
   0  -7  10    1.30    1.02
   0   7 -10    0.09    0.87
   0  -7  10    1.80    0.57
   0   7 -10    1.57    0.60
   0  -7  10    2.74    0.73
   0  -7  10    2.33    0.70
   0   7 -10    2.09    0.58
   0   7 -10    1.19    0.48
   0  -7  10   -1.21    0.66
   0  -7  10    4.40    0.82
   0   7 -10    2.54    0.65
   0   7 -10    2.86    1.32
   0  -7  10    2.34    0.56
   0   7 -10    2.04    0.65
   0   7  -9    2.05    0.98
   0  -7   9    2.63    1.06
   0  -7   9    2.16    1.22
   0   7  -9    5.67    1.62
   0  -7   8   29.45    2.99
   0   7  -8   31.08    2.95
   0   7  -8   32.72    3.40
   0  -7   8   30.34    2.95
   0  -7   7   48.33    3.50
   0  -7   7   39.44    3.45
   0   7  -7   41.49    3.65
   0  -7   6  214.10    7.10
   0  -7   6  191.50    7.38
   0  -7   6  197.82    6.93
   0  -7   6  212.76    6.70
   0   7  -6  203.84    7.74
   0  -7   5    5.04    1.14
   0  -7   5    4.90    1.82
   0  -7   5    4.86    1.01
   0  -7   5    4.77    1.15
   0   7  -5    4.99    1.11
   0   7  -5    4.28    1.44
   0  -7   5    4.35    1.24
   0  -7   4  342.23    8.31
   0   7  -4  340.01    7.98
   0  -7   4  346.67    8.52
   0  -7   4  327.95   10.41
   0  -7   4  349.25    9.14
   0  -7   3   66.58    4.37
   0  -7   3   74.05    3.94
   0  -7   3   63.31    3.22
   0   7  -3   64.25    3.86
   0   7  -3   69.61    2.99
   0  -7   2   63.25    3.68
   0   7  -2   51.12    3.31
   0   7  -2   66.79    2.59
   0  -7   2   53.84    2.92
   0  -7   2   57.48    4.10
   0  -7   2   53.76    3.89
   0  -7   2   50.97    3.94
   0   7  -1  413.19    7.28
   0  -7   1  401.36   10.81
   0   7  -1  418.72    9.91
   0  -7   1  409.20   11.00
   0  -7   0 2272.86   34.74
   0   7   0 2301.34   28.67
   0  -7   0 2175.05   34.76
   0  -7   0 2187.49   32.17
   0   7   0 2244.89   32.97
   0   7   1   26.45    2.27
   0  -7  -1   29.78    2.75
   0  -7  -1   28.73    2.40
   0  -7  -1   23.32    1.97
   0  -7  -1   26.37    2.64
   0  -7  -2  514.49   10.85
   0   7   2  516.73   10.90
   0  -7  -2  497.84   10.57
   0  -7  -2  481.15   11.32
   0  -7  -3  820.45   16.03
   0   7   3  860.88   15.46
   0  -7  -3  823.38   14.94
   0  -7  -3  826.37   13.62
   0   7   3  828.92   13.17
   0  -7  -4  824.78   16.04
   0   7   4  839.79   15.77
   0  -7  -4  855.10   15.09
   0  -7  -4  875.01   16.65
   0   7   4  885.95   13.64
   0  -7  -4  897.40   14.72
   0  -7  -5    5.57    1.08
   0  -7  -5    4.92    1.37
   0  -7  -5    4.33    0.91
   0   7   5    4.60    1.27
   0   7   5    8.69    0.97
   0  -7  -6    2.28    1.21
   0  -7  -6    1.92    0.75
   0   7   6    4.95    0.80
   0  -7  -6    4.07    0.89
   0   7   6    3.14    1.21
   0   7   6    2.58    1.23
   0   7   7 1997.02   31.37
   0  -7  -7 2007.75   32.07
   0  -7  -7 2021.95   28.20
   0   7   7 1971.77   31.16
   0   7   7 2100.46   28.27
   0  -7  -8    8.84    1.81
   0   7   8    8.06    1.03
   0   7   8    6.71    1.60
   0  -7  -8    6.76    1.07
   0   7   8   10.03    1.72
   0  -7  -8    5.97    1.09
   0  -7  -9   34.68    2.37
   0  -7  -9   31.40    2.63
   0  -7  -9   30.06    2.40
   0   7   9   27.54    1.95
   0   7   9   26.93    2.77
   0   7   9   34.14    2.91
   0   7  10  558.71   13.78
   0  -7 -10  546.35   12.69
   0   7  10  578.39   13.43
   0  -7 -10  541.22   12.59
   0  -7 -11  108.54    5.22
   0   7  11  115.08    5.58
   0  -7 -11   99.96    5.13
   0   7  12  233.86    8.47
   0  -7 -12  224.56    8.33
   0  -7 -12  239.19    7.92
   0  -7 -12  216.38    7.95
   0   7  13  187.32    4.22
   0   7  13  181.86    7.60
   0   7  13  180.43    4.51
   0  -7 -13  188.56    7.33
   0   7  13  187.57    4.27
   0  -7 -13  179.46    7.75
   0   7  13  180.93    4.21
   0   7  13  187.58    4.51
   0   7  13  170.91    4.23
   0   7  13  181.99    4.33
   0   7  14  637.16    9.97
   0   7  14  600.58   10.53
   0   7  14  608.96   10.30
   0   7  14  643.33   10.14
   0   7  14  638.38   10.43
   0   7  14  655.32   10.31
   0  -7 -14  632.80   16.41
   0  -7 -14  656.92   15.55
   0   7  14  653.10   16.02
   0   7  14  645.96   10.64
   0   7  15   38.43    1.91
   0   7  15   36.92    1.96
   0   7  15   40.68    2.03
   0  -7 -15   36.08    3.79
   0   7  15   38.31    3.55
   0   7  15   37.67    1.83
   0   7  15   36.61    1.89
   0   7  15   40.01    1.81
   0  -7 -15   36.65    3.48
   0  -7 -15   38.23    3.84
   0   7  15   38.46    1.76
   0   7  16    8.60    1.01
   0   7  16    7.43    0.85
   0   7  16    7.85    0.98
   0   7  16    8.46    1.02
   0  -7 -16    7.44    1.96
   0  -7 -16    9.52    2.54
   0   7  16    8.30    1.04
   0   7  16    8.42    0.91
   0   7  16    7.10    0.84
   0   7  17  222.17    4.83
   0   7  17  217.11    5.14
   0   7  17  227.33    4.88
   0   7  17  241.80    5.23
   0   7  17  220.85    5.15
   0  -7 -17  228.55    9.95
   0   7  17  220.97    5.19
   0   7  17  227.93    5.03
   0  -7 -17  235.83   10.80
   0   7  18   84.75    2.76
   0   7  18   84.96    2.80
   0   7  18   79.73    2.59
   0  -7 -18   82.77    5.91
   0   7  18   79.48    2.73
   0   7  18   80.25    2.54
   0  -7 -19   32.52    3.68
   0   7  19   36.01    1.65
   0   7  19   37.97    1.80
   0   7  19   36.06    1.56
   0   7  20   48.34    1.68
   0   7  20   48.13    1.90
   0   7  20   46.73    1.80
   0   7  21   23.89    1.18
   0   7  21   23.49    1.22
   0   7  22  111.06    2.55
   0   7  22  111.15    2.46
   0   7  23    8.04    0.50
   0   7  23    7.48    0.49
   0   7  23    9.04    0.56
   0   8 -19    9.44    0.68
   0  -8  19    9.64    0.62
   0   8 -19    9.20    0.62
   0  -8  18   49.14    1.63
   0   8 -18   44.38    1.62
   0  -8  18   45.27    1.61
   0   8 -18   45.61    1.72
   0   8 -17  110.87    3.06
   0   8 -17  107.01    2.94
   0  -8  17  112.88    2.98
   0   8 -17  111.97    2.62
   0  -8  17  118.70    2.95
   0   8 -17  109.12    2.95
   0   8 -16  119.57    3.35
   0   8 -16  120.76    3.05
   0   8 -16  126.30    3.51
   0   8 -16  118.23    3.33
   0  -8  16  127.16    3.35
   0   8 -16  118.31    3.08
   0  -8  16  119.55    3.35
   0   8 -15   25.16    1.58
   0   8 -15   28.04    1.76
   0  -8  15   26.82    1.66
   0   8 -15   27.65    1.51
   0  -8  15   28.06    1.71
   0   8 -15   27.18    1.49
   0   8 -15   26.75    1.67
   0  -8  15   26.68    1.64
   0   8 -14  115.10    3.32
   0   8 -14  114.75    3.55
   0  -8  14  118.43    3.58
   0  -8  14  115.02    3.42
   0   8 -14  108.17    3.40
   0   8 -14  119.22    3.64
   0  -8  14  118.13    3.66
   0   8 -14  115.89    3.16
   0   8 -14  113.19    3.29
   0  -8  13  480.78    8.90
   0   8 -13  480.24    8.55
   0   8 -13  495.73    8.98
   0   8 -13  507.36    8.49
   0  -8  13  488.68    9.09
   0   8 -13  488.59    8.56
   0  -8  13  494.44    9.04
   0  -8  13  481.49    8.66
   0   8 -13  477.49    8.77
   0   8 -13  499.79    8.93
   0   8 -12   79.10    2.93
   0   8 -12   78.32    2.70
   0   8 -12   72.10    2.74
   0   8 -12   78.39    2.98
   0  -8  12   76.60    2.76
   0  -8  12   77.90    2.93
   0  -8  12   75.57    2.91
   0   8 -12   73.19    2.69
   0  -8  12   75.33    3.05
   0  -8  12   78.91    2.75
   0   8 -11   40.36    3.89
   0   8 -11   45.13    2.02
   0  -8  11   42.10    2.13
   0  -8  11   41.80    2.01
   0   8 -11   41.64    2.12
   0   8 -11   41.40    2.14
   0  -8  11   42.99    2.27
   0   8 -11   42.05    1.98
   0  -8  11   43.69    2.19
   0   8 -11   44.25    2.08
   0   8 -11   40.28    1.99
   0  -8  11   41.09    1.98
   0  -8  11   41.51    2.23
   0   8 -10  310.73   10.96
   0  -8  10  341.66    6.87
   0  -8  10  323.39    6.67
   0   8 -10  336.80    6.56
   0   8 -10  334.60    6.71
   0  -8  10  338.59    7.12
   0  -8  10  349.02    7.19
   0   8 -10  335.56    6.70
   0   8 -10  341.23    6.67
   0   8 -10  329.84    6.47
   0  -8  10  329.88    6.43
   0   8 -10  337.84    6.59
   0  -8  10  308.95   10.99
   0   8  -9   13.06    2.08
   0   8  -9   11.21    1.00
   0   8  -9   14.17    1.16
   0  -8   9   11.66    2.04
   0   8  -9   14.82    1.24
   0   8  -9   15.10    1.19
   0   8  -9   13.25    1.11
   0  -8   9   14.10    1.18
   0  -8   9   13.94    1.30
   0  -8   9   13.37    1.26
   0  -8   9   13.18    1.09
   0   8  -8   10.84    0.97
   0  -8   8    9.12    1.06
   0   8  -8    9.76    0.93
   0  -8   8    6.74    1.72
   0  -8   8    9.17    1.11
   0   8  -8   10.92    1.80
   0  -8   7   34.78    3.43
   0   8  -7   42.16    3.19
   0  -8   6  162.42    7.30
   0   8  -6  178.97    6.37
   0  -8   5   70.97    4.14
   0  -8   5   73.97    4.78
   0   8  -5   77.95    3.78
   0  -8   5   74.44    4.42
   0   8  -5   57.88    4.19
   0  -8   5   66.60    5.07
   0  -8   4   26.97    2.54
   0  -8   4   26.84    3.22
   0   8  -4   20.94    1.82
   0  -8   4   26.12    2.82
   0  -8   3   40.40    3.74
   0  -8   3   39.68    3.35
   0   8  -3   41.48    2.35
   0  -8   3   41.89    3.20
   0   8  -3   43.64    3.32
   0   8  -2   11.87    1.88
   0  -8   2   13.91    2.04
   0  -8   2   12.42    2.63
   0  -8   2   13.94    2.55
   0  -8   2   13.83    2.03
   0  -8   2   14.55    2.51
   0  -8   1   84.41    5.13
   0  -8   1   81.93    4.53
   0   8  -1   88.95    4.50
   0  -8   1   81.87    5.14
   0  -8   1   94.76    5.44
   0   8   0  197.10    6.74
   0  -8   0  190.09    6.83
   0  -8   0  188.16    7.50
   0  -8   0  191.11    7.68
   0  -8  -1    3.07    1.81
   0  -8  -1    4.49    1.50
   0   8   1    2.95    1.20
   0  -8  -1    5.67    1.16
   0  -8  -1    3.44    1.84
   0  -8  -2 1100.77   19.57
   0  -8  -2 1083.11   19.05
   0  -8  -2 1108.76   21.34
   0   8   2 1163.46   19.83
   0  -8  -2 1066.04   20.47
   0  -8  -2 1126.67   21.25
   0  -8  -3   50.01    3.20
   0  -8  -3   46.17    3.06
   0  -8  -3   49.38    3.63
   0   8   3   57.29    2.52
   0   8   3   54.38    3.45
   0  -8  -4  583.51   13.77
   0  -8  -4  616.09   13.33
   0   8   4  622.02   13.33
   0  -8  -4  606.83   12.75
   0  -8  -4  620.18   11.64
   0   8   5  488.78   11.55
   0  -8  -5  461.67   11.69
   0   8   5  494.18    9.13
   0  -8  -5  492.01   12.21
   0  -8  -5  490.57   10.36
   0  -8  -5  464.57   10.46
   0  -8  -6  365.76    8.67
   0  -8  -6  362.36   10.25
   0   8   6  383.10   10.08
   0  -8  -6  373.65    9.20
   0  -8  -7  137.82    6.12
   0  -8  -7  131.00    4.60
   0  -8  -7  138.24    5.47
   0   8   7  139.59    5.91
   0  -8  -8  577.38   11.86
   0  -8  -8  575.82   14.23
   0   8   8  595.47   13.86
   0  -8  -8  577.20   13.15
   0   8   8  564.54   13.45
   0  -8  -9  439.15   10.42
   0  -8  -9  426.52   11.42
   0   8   9  447.11   11.75
   0   8   9  435.49   11.83
   0  -8  -9  423.33   10.94
   0  -8  -9  434.31   12.37
   0   8  10    8.98    1.75
   0  -8 -10    8.31    1.72
   0  -8 -10    8.12    1.36
   0   8  10    7.57    1.61
   0  -8 -10    9.00    1.84
   0  -8 -10    8.01    1.37
   0  -8 -11   12.39    1.78
   0   8  11   12.05    1.99
   0  -8 -11   14.20    2.43
   0  -8 -11   10.02    1.64
   0   8  12   23.98    2.77
   0  -8 -12   23.04    2.55
   0   8  12   22.35    1.44
   0  -8 -12   22.13    2.99
   0  -8 -12   20.73    2.46
   0   8  13   15.04    1.31
   0   8  13   16.28    1.20
   0   8  13   17.02    1.18
   0  -8 -13   12.84    2.53
   0   8  13   17.49    1.32
   0  -8 -13   19.69    2.58
   0   8  13   15.21    2.25
   0  -8 -13   12.11    2.27
   0   8  14  419.57    7.57
   0   8  14  394.57    7.58
   0  -8 -14  429.42   14.05
   0   8  14  433.84    7.71
   0   8  14  426.53    7.54
   0  -8 -14  436.17   12.97
   0   8  14  415.51    7.22
   0   8  14  423.56    7.96
   0  -8 -14  456.53   15.08
   0  -8 -14  420.11   12.82
   0   8  14  408.33    7.98
   0   8  14  453.85   13.06
   0   8  15  223.44    5.29
   0   8  15  219.80    4.96
   0   8  15  212.46    5.00
   0  -8 -15  233.69   10.37
   0   8  15  215.54    4.63
   0   8  15  228.28    5.09
   0  -8 -15  235.09    9.53
   0   8  15  224.90    8.98
   0   8  15  211.31    5.24
   0   8  15  225.54    4.93
   0   8  16  209.36    5.18
   0   8  16  226.29    5.08
   0  -8 -16  229.23    9.60
   0   8  16  220.30    4.70
   0  -8 -16  230.27   10.57
   0   8  16  223.46    5.27
   0   8  16  219.26    4.84
   0   8  16  213.73    5.01
   0   8  16  226.17    5.08
   0  -8 -17    1.47    1.62
   0  -8 -17    0.09    0.99
   0   8  17   -0.57    0.75
   0   8  17    1.34    0.71
   0   8  17    0.18    0.49
   0   8  17   -0.50    0.69
   0   8  17    1.01    0.65
   0   8  17    1.78    0.56
   0   8  18    3.15    0.62
   0   8  18    2.52    0.58
   0  -8 -18    4.00    1.33
   0   8  18    3.53    0.70
   0   8  18    2.08    0.71
   0   8  19  543.13    8.57
   0   8  19  553.24    8.96
   0  -8 -19  529.19   15.20
   0   8  19  529.51    8.82
   0   8  19  533.02    8.52
   0   8  20   55.55    1.81
   0   8  20   55.32    1.86
   0   8  20   55.76    2.05
   0   8  21   44.89    1.40
   0   8  21   45.57    1.53
   0   8  21   47.69    1.69
   0   8  22    9.23    0.59
   0   8  22   10.46    0.72
   0   8  22    9.04    0.65
   0   8  23   80.13    1.73
   0   8  23   76.92    1.71
   0  -9  18   23.97    0.99
   0   9 -18   21.81    0.89
   0   9 -18   24.38    1.09
   0   9 -17    2.18    0.48
   0   9 -17    3.45    0.66
   0  -9  17    2.90    0.55
   0  -9  17    2.55    0.54
   0   9 -17    2.51    0.40
   0   9 -16   30.34    1.46
   0   9 -16   35.97    1.65
   0   9 -16   32.35    1.39
   0  -9  16   33.06    1.60
   0   9 -16   33.37    1.66
   0  -9  16   34.81    1.57
   0   9 -15   65.45    2.49
   0  -9  15   69.32    2.54
   0   9 -15   63.25    2.32
   0   9 -15   62.33    2.18
   0   9 -15   68.96    2.49
   0  -9  15   68.80    2.38
   0  -9  15   67.59    2.40
   0   9 -14   49.91    2.06
   0  -9  14   52.08    2.19
   0   9 -14   51.82    2.15
   0   9 -14   52.74    2.29
   0   9 -14   53.57    2.33
   0  -9  14   54.60    2.39
   0  -9  14   52.38    2.24
   0  -9  13    4.01    0.94
   0  -9  13    3.98    0.87
   0  -9  13    2.83    0.76
   0   9 -13    3.91    0.73
   0   9 -13    3.48    0.94
   0   9 -13    3.88    0.67
   0   9 -13    4.15    0.78
   0   9 -13    4.14    0.97
   0   9 -12  112.43    3.35
   0   9 -12  109.25    3.35
   0  -9  12  110.80    3.51
   0   9 -12  113.44    3.56
   0  -9  12  112.65    3.37
   0  -9  12  106.98    3.46
   0   9 -12  111.02    3.54
   0   9 -12  109.36    3.29
   0  -9  12  112.42    3.34
   0  -9  12  108.38    3.65
   0  -9  11  173.37    4.60
   0  -9  11  175.02    4.91
   0   9 -11  178.17    4.45
   0   9 -11  187.84    4.71
   0  -9  11  186.78    4.73
   0   9 -11  179.14    4.47
   0  -9  11  177.34    4.41
   0   9 -11  176.15    4.61
   0  -9  11  183.34    4.59
   0   9 -11  176.33    4.41
   0  -9  11  185.63    4.97
   0   9 -11  186.09    4.65
   0   9 -10   17.41    1.40
   0  -9  10   12.85    1.22
   0   9 -10   15.24    1.32
   0  -9  10   13.59    1.22
   0   9 -10   16.03    1.34
   0   9 -10   14.95    1.19
   0  -9  10   15.38    1.45
   0   9 -10   14.26    1.20
   0  -9  10   13.69    1.20
   0  -9  10   14.74    1.45
   0   9 -10   15.40    1.26
   0  -9   9   91.96    3.14
   0   9  -9   97.26    2.99
   0  -9   9   82.16    5.73
   0  -9   9   96.94    3.46
   0  -9   9   97.32    3.50
   0  -9   9   93.28    2.94
   0   9  -9   91.97    2.95
   0   9  -9   97.18    3.13
   0   9  -9   96.92    3.17
   0   9  -9   96.16    3.12
   0   9  -9   96.79    6.45
   0   9  -9   98.44    3.12
   0   9  -8  310.08    6.04
   0  -9   8  285.46   10.99
   0   9  -8  318.43    6.35
   0   9  -8  319.01    6.34
   0  -9   8  307.61    6.80
   0  -9   8  309.51    6.05
   0   9  -8  327.34    6.40
   0  -9   8  325.73    6.93
   0   9  -8  304.98   11.43
   0   9  -8  322.46    6.35
   0  -9   8  299.50    6.33
   0  -9   8  333.65    6.89
   0  -9   7   40.50    3.92
   0   9  -7   42.55    1.90
   0   9  -7   40.69    1.88
   0  -9   7   41.89    2.13
   0  -9   7   41.27    2.18
   0   9  -7   40.23    1.89
   0   9  -7   44.40    1.95
   0  -9   7   40.75    2.18
   0   9  -7   36.60    3.85
   0  -9   6   51.90    4.38
   0   9  -6   49.18    4.26
   0  -9   5   24.33    2.71
   0   9  -5   25.92    3.06
   0  -9   5   23.11    2.90
   0  -9   5   23.61    3.43
   0  -9   4  118.88    5.86
   0  -9   4  104.40    5.93
   0  -9   4  104.97    6.54
   0   9  -4  109.33    5.83
   0  -9   3  161.48    7.97
   0   9  -3  150.87    6.70
   0  -9   3  163.93    7.25
   0  -9   3  168.92    7.10
   0  -9   2    6.77    1.78
   0  -9   2    9.55    2.37
   0  -9   2    5.06    2.17
   0  -9   2    8.70    1.78
   0   9  -2    7.13    1.59
   0  -9   1  280.03   10.30
   0  -9   1  296.66   10.63
   0  -9   1  311.64   10.76
   0   9  -1  302.60    9.27
   0  -9   1  291.36    9.70
   0  -9   1  291.93    9.48
   0  -9   0    4.05    1.42
   0   9   0    0.99    1.17
   0  -9   0    1.69    1.60
   0  -9   0    2.13    1.75
   0  -9  -1  224.64    7.91
   0  -9  -1  226.74    8.86
   0   9   1  236.37    7.83
   0  -9  -1  234.41    8.98
   0  -9  -2  200.80    8.21
   0  -9  -2  192.01    8.00
   0   9   2  209.20    7.25
   0  -9  -2  190.41    7.10
   0  -9  -3  144.08    5.98
   0   9   3  157.02    4.63
   0  -9  -3  145.07    6.84
   0  -9  -3  145.48    6.65
   0   9   3  149.90    6.13
   0  -9  -3  142.30    6.86
   0  -9  -3  135.73    5.69
   0  -9  -4  112.36    5.09
   0   9   4  116.36    5.33
   0  -9  -4  112.65    5.15
   0   9   5    7.79    1.55
   0  -9  -5    5.76    1.32
   0  -9  -5    8.64    1.43
   0  -9  -5    8.83    1.94
   0  -9  -6   90.87    4.29
   0  -9  -6   87.47    4.19
   0   9   6   93.49    4.95
   0  -9  -6   89.74    5.15
   0  -9  -6   88.58    5.21
   0   9   7  476.86   12.29
   0  -9  -7  450.15   12.69
   0  -9  -7  443.12   12.46
   0  -9  -7  466.44   11.28
   0  -9  -8  265.16    8.33
   0   9   8  252.75    8.80
   0  -9  -9  565.94   15.06
   0   9   9  559.50   14.31
   0  -9  -9  570.83   13.79
   0  -9 -10  123.47    6.72
   0  -9 -10  118.71    5.71
   0   9  10  127.68    6.48
   0  -9 -10  122.36    6.11
   0   9  11   44.32    2.08
   0   9  11   42.54    1.96
   0  -9 -11   43.81    3.48
   0   9  11   43.70    1.86
   0   9  11   41.39    3.81
   0  -9 -11   43.15    3.78
   0  -9 -11   43.08    4.18
   0   9  12  133.83    3.63
   0   9  12  142.96    3.68
   0   9  12  145.73    3.71
   0  -9 -12  138.12    7.09
   0   9  12  140.66    3.87
   0   9  12  142.79    4.03
   0  -9 -13  354.50   12.31
   0   9  13  371.46    6.86
   0   9  13  358.26    7.14
   0   9  13  359.00    7.26
   0   9  13  342.95    6.76
   0   9  13  369.41    6.82
   0  -9 -14    4.38    1.71
   0   9  14    5.31    0.80
   0   9  14    5.63    0.93
   0   9  14    5.99    0.96
   0   9  14    5.88    0.83
   0   9  14    5.30    0.79
   0   9  15  236.17    5.54
   0   9  15  215.85    5.09
   0   9  15  235.39    4.75
   0   9  15  236.84    5.22
   0   9  15  233.21    5.56
   0  -9 -15  242.59    9.45
   0   9  15  228.48    5.06
   0  -9 -15  226.59   10.20
   0   9  16   64.08    2.36
   0   9  16   60.36    2.57
   0   9  16   62.05    2.59
   0   9  16   65.34    2.20
   0  -9 -16   59.12    5.27
   0  -9 -16   65.49    4.93
   0   9  16   58.79    2.38
   0   9  16   60.98    2.42
   0   9  17  217.69    4.89
   0   9  17  209.42    4.85
   0   9  17  224.79    4.96
   0   9  17  223.79    4.53
   0   9  17  219.37    5.16
   0   9  17  210.17    5.13
   0   9  17  218.77    4.75
   0   9  18    0.43    0.44
   0   9  18   -0.27    0.77
   0   9  18   -0.34    0.66
   0   9  18   -0.33    0.61
   0   9  18    0.66    0.48
   0   9  19   49.65    1.75
   0   9  19   50.71    2.04
   0   9  19   49.76    1.83
   0  -9 -19   49.63    4.64
   0   9  19   48.19    2.01
   0   9  20  150.56    3.42
   0   9  20  154.28    3.18
   0   9  20  160.85    3.57
   0   9  20  148.56    3.24
   0   9  21   93.70    2.37
   0   9  21   94.30    2.40
   0   9  21   88.90    2.07
   0   9  21   90.23    2.08
   0   9  22    7.66    0.63
   0   9  22    6.86    0.57
   0   9  22    6.57    0.53
   0   9  23   10.79    0.55
   0 -10  17   23.92    1.01
   0  10 -17   23.02    1.07
   0 -10  17   22.51    1.03
   0 -10  16    6.74    0.70
   0  10 -16    5.81    0.58
   0 -10  16    5.81    0.70
   0  10 -16    6.17    0.76
   0  10 -16    6.87    0.62
   0 -10  15   72.55    2.24
   0  10 -15   71.08    2.36
   0 -10  15   70.23    2.38
   0 -10  15   68.73    2.25
   0  10 -15   68.91    2.33
   0  10 -15   67.41    2.09
   0  10 -15   68.22    2.14
   0 -10  14   30.03    1.73
   0 -10  14   29.57    1.58
   0  10 -14   29.32    1.64
   0  10 -14   30.31    1.49
   0  10 -14   32.22    1.56
   0 -10  14   30.67    1.55
   0  10 -14   30.14    1.69
   0  10 -13    4.57    0.88
   0  10 -13    4.39    0.71
   0  10 -13    5.06    0.84
   0  10 -13    5.75    0.86
   0 -10  13    4.39    0.93
   0 -10  13    3.81    0.74
   0 -10  13    5.11    0.84
   0  10 -12    0.45    0.49
   0 -10  12   -1.05    0.81
   0 -10  12   -0.64    0.99
   0  10 -12   -0.29    0.62
   0 -10  12   -0.37    0.70
   0 -10  12    0.27    0.47
   0  10 -12    0.03    0.72
   0  10 -12   -0.44    0.80
   0 -10  12    0.82    0.64
   0  10 -12    0.56    0.56
   0 -10  11   70.79    2.75
   0 -10  11   77.50    3.07
   0  10 -11   79.50    2.76
   0 -10  11   75.12    2.65
   0 -10  11   74.89    2.75
   0  10 -11   70.94    2.75
   0 -10  11   76.69    3.06
   0 -10  11   73.48    2.78
   0  10 -11   75.12    2.73
   0  10 -11   72.63    2.55
   0  10 -11   73.90    2.80
   0 -10  10   36.72    2.16
   0 -10  10   36.96    1.99
   0  10 -10   44.01    2.10
   0  10 -10   42.50    2.01
   0 -10  10   42.55    1.96
   0 -10  10   38.99    2.20
   0 -10  10   41.20    2.08
   0  10 -10   42.34    1.89
   0  10 -10   43.04    2.11
   0  10 -10   40.05    2.06
   0  10 -10   41.89    2.09
   0  10  -9  110.12    3.35
   0  10  -9  116.64    3.56
   0 -10   9  110.02    3.61
   0 -10   9  113.95    3.30
   0 -10   9  116.12    3.90
   0  10  -9  119.67    3.54
   0 -10   9  113.43    3.54
   0  10  -9  112.79    3.52
   0  10  -9  116.88    3.53
   0 -10   9  115.97    3.98
   0 -10   8  159.49    8.33
   0  10  -8  183.37    4.31
   0 -10   8  169.02    4.48
   0 -10   8  182.28    4.25
   0  10  -8  184.08    4.55
   0 -10   8  175.81    4.96
   0  10  -8  181.81    4.50
   0  10  -8  188.07    4.60
   0  10  -8  184.28    4.57
   0 -10   8  170.26    4.92
   0  10  -8  164.71    8.47
   0 -10   8  172.79    4.84
   0 -10   7   88.74    6.12
   0 -10   7  105.81    3.02
   0  10  -7   97.98    6.36
   0  10  -7  104.70    3.20
   0  10  -7  106.67    3.27
   0  10  -7  103.64    3.25
   0  10  -7  103.59    3.12
   0 -10   7   97.42    3.18
   0 -10   7  101.97    3.64
   0 -10   7  108.36    3.59
   0  10  -7  105.87    3.20
   0 -10   7  101.94    3.59
   0  10  -6    4.38    1.60
   0  10  -6    6.30    0.80
   0 -10   6    5.81    1.04
   0 -10   6    5.33    1.74
   0  10  -6    5.05    0.76
   0  10  -6    5.08    0.72
   0 -10   6    5.42    0.86
   0  10  -6    5.16    0.78
   0 -10   6    6.36    0.74
   0  10  -6    5.97    0.82
   0  10  -5   11.91    1.01
   0 -10   5   11.36    2.11
   0  10  -5   13.30    1.07
   0  10  -5   13.22    1.08
   0  10  -5   11.38    1.01
   0 -10   5   12.26    2.35
   0  10  -5   13.49    1.05
   0 -10   5   11.39    1.23
   0 -10   4  196.51    9.63
   0  10  -4  222.11    8.95
   0 -10   4  209.11    9.08
   0 -10   4  216.44    8.63
   0  10  -3  129.93    6.61
   0 -10   3  118.37    7.35
   0 -10   3  124.92    6.53
   0 -10   3  120.16    6.69
   0  10  -2   37.10    3.42
   0 -10   2   38.42    3.74
   0 -10   2   38.29    4.21
   0 -10   2   37.52    3.59
   0  10  -1    9.92    1.91
   0 -10   1    9.22    2.62
   0 -10   1    7.78    1.90
   0 -10   1    6.94    2.13
   0 -10   1   10.84    2.09
   0 -10   1    8.88    2.59
   0 -10   0   99.65    6.39
   0 -10   0   90.72    5.38
   0 -10   0   85.09    5.98
   0  10   0  102.57    5.45
   0 -10   0   98.79    6.40
   0 -10   0   86.96    5.56
   0 -10  -1  552.67   15.59
   0 -10  -1  547.68   14.09
   0 -10  -1  534.46   15.46
   0  10   1  575.61   13.97
   0  10   2   49.41    3.73
   0 -10  -2   47.43    4.38
   0 -10  -2   40.81    4.23
   0 -10  -2   44.53    3.67
   0 -10  -3  238.89    9.59
   0  10   3  246.85    8.52
   0 -10  -3  234.60    8.35
   0 -10  -3  239.36    9.56
   0 -10  -4  268.88   10.12
   0 -10  -4  271.41    8.83
   0 -10  -4  268.57   10.21
   0  10   4  288.33    9.25
   0 -10  -4  250.50    9.54
   0  10   5  164.04    6.93
   0 -10  -5  160.39    6.66
   0 -10  -5  160.79    6.52
   0 -10  -5  145.36    7.17
   0  10   6   93.82    5.25
   0 -10  -6   95.03    4.76
   0 -10  -6   89.62    5.03
   0 -10  -6   85.04    5.49
   0 -10  -7   80.20    4.87
   0 -10  -7   65.54    4.81
   0  10   7   80.73    4.93
   0 -10  -8    7.96    1.85
   0 -10  -8    6.18    1.81
   0  10   8    7.89    1.83
   0 -10  -9  172.00    7.01
   0 -10  -9  158.50    7.80
   0 -10  -9  159.63    7.75
   0  10   9  166.31    7.52
   0  10  10   32.23    1.63
   0 -10 -10   31.86    3.17
   0  10  10   30.12    1.54
   0  10  10   35.90    1.74
   0  10  10   29.78    3.32
   0 -10 -10   28.63    3.40
   0  10  10   29.15    1.61
   0 -10 -10   29.66    2.99
   0  10  10   31.83    1.78
   0  10  10   31.66    1.63
   0  10  11   22.02    1.40
   0 -10 -11   23.39    3.16
   0  10  11   22.54    2.92
   0 -10 -11   25.65    2.93
   0  10  11   21.46    1.26
   0  10  11   20.57    1.44
   0  10  11   21.51    1.34
   0  10  11   20.36    1.33
   0  10  11   23.15    1.62
   0 -10 -12   49.24    4.18
   0  10  12   47.58    2.03
   0 -10 -12   50.11    4.68
   0  10  12   51.07    2.26
   0  10  12   54.36    2.44
   0  10  12   50.83    2.14
   0  10  12   49.45    2.10
   0  10  13   24.50    1.71
   0  10  13   24.96    1.51
   0 -10 -13   24.20    3.09
   0  10  13   24.17    1.49
   0  10  13   23.18    1.45
   0  10  13   22.36    1.56
   0  10  14  187.75    4.45
   0  10  14  181.43    4.43
   0 -10 -14  178.11    8.68
   0  10  14  186.82    4.79
   0  10  14  173.27    4.38
   0  10  14  185.96    4.89
   0  10  15   55.41    2.28
   0  10  15   57.89    2.30
   0  10  15   56.89    2.58
   0  10  15   56.89    2.31
   0 -10 -15   53.57    4.91
   0  10  15   58.53    2.53
   0  10  16    2.21    0.59
   0  10  16    2.36    0.82
   0  10  16    3.86    0.88
   0  10  16    4.27    0.79
   0 -10 -16    1.52    1.18
   0  10  16    3.39    0.68
   0 -10 -17   95.13    6.47
   0  10  17   92.84    2.96
   0  10  17   91.53    2.89
   0  10  17   97.53    2.90
   0  10  17   92.28    3.15
   0  10  17   95.45    2.96
   0  10  18  168.83    3.91
   0 -10 -18  174.93    8.66
   0  10  18  171.99    4.04
   0  10  18  168.59    3.86
   0  10  18  161.24    4.18
   0  10  19    3.53    0.60
   0  10  19    2.80    0.69
   0  10  19    2.84    0.66
   0  10  19    2.17    0.56
   0  10  20   27.78    1.31
   0  10  20   27.42    1.33
   0  10  20   26.27    1.27
   0  10  20   26.50    1.18
   0  10  21  129.41    2.77
   0  10  21  133.29    2.93
   0  10  21  135.21    2.87
   0  10  22   18.56    0.77
   0  10  22   18.62    0.84
   0  10  22   18.58    0.85
   0 -11  16   81.95    1.93
   0 -11  16   80.12    2.07
   0  11 -16   78.26    1.81
   0  11 -16   79.22    2.05
   0 -11  15   35.29    1.53
   0  11 -15   37.02    1.51
   0  11 -15   36.18    1.39
   0 -11  15   37.03    1.41
   0 -11  14    3.10    0.59
   0 -11  14    3.63    0.64
   0  11 -14    2.84    0.59
   0 -11  14    3.27    0.74
   0  11 -14    3.17    0.73
   0 -11  13   34.93    1.85
   0  11 -13   35.41    1.74
   0 -11  13   34.07    1.65
   0 -11  13   33.36    1.58
   0  11 -13   37.43    1.70
   0  11 -13   37.66    1.84
   0 -11  12   28.10    1.51
   0 -11  12   29.16    1.81
   0 -11  12   27.11    1.57
   0  11 -12   29.28    1.60
   0 -11  12   27.71    1.50
   0  11 -12   29.44    1.67
   0  11 -12   30.40    1.72
   0 -11  11    2.71    0.69
   0  11 -11    3.06    0.76
   0 -11  11    2.76    0.68
   0 -11  11    2.85    0.70
   0  11 -11    2.88    0.82
   0 -11  11    2.98    0.89
   0  11 -11    2.90    0.79
   0  11 -11    3.83    0.80
   0 -11  11    2.79    0.66
   0  11 -10   87.68    3.00
   0 -11  10   89.10    3.37
   0 -11  10   87.56    2.81
   0  11 -10   87.00    2.92
   0 -11  10   87.89    3.32
   0  11 -10   87.04    3.00
   0  11 -10   86.81    2.95
   0 -11  10   89.49    3.02
   0 -11  10   87.05    3.07
   0 -11  10   84.53    2.97
   0  11  -9  215.18    5.09
   0 -11   9  213.85    5.58
   0  11  -9  216.69    5.08
   0  11  -9  226.89    4.86
   0 -11   9  217.26    4.83
   0 -11   9  217.16    5.12
   0 -11   9  209.30    5.31
   0 -11   9  224.29    5.69
   0  11  -9  220.54    5.04
   0  11  -9  227.69    5.28
   0  11  -9  218.14    5.16
   0  11  -8    1.09    0.63
   0  11  -8    0.03    0.51
   0  11  -8    0.15    0.73
   0  11  -8    0.18    0.59
   0  11  -8    0.08    0.71
   0 -11   8    0.88    0.54
   0 -11   8    0.95    0.92
   0 -11   8    1.32    0.60
   0 -11   8    1.16    0.79
   0  11  -8    1.16    0.64
   0 -11   7   16.78    2.81
   0  11  -7   25.23    1.65
   0 -11   7   22.82    1.54
   0  11  -7   23.16    1.51
   0 -11   7   22.99    1.86
   0  11  -7   23.99    1.57
   0 -11   7   24.76    1.41
   0 -11   7   22.98    1.70
   0  11  -7   23.79    1.51
   0  11  -7   25.73    1.53
   0 -11   7   21.60    1.83
   0 -11   6  234.32    4.81
   0 -11   6  224.20    5.59
   0  11  -6  227.20    5.07
   0 -11   6  220.77    5.82
   0  11  -6  232.64   10.00
   0  11  -6  228.90    5.13
   0  11  -6  231.28    5.28
   0  11  -6  218.73    5.06
   0 -11   6  220.25    5.72
   0  11  -6  227.56    5.19
   0 -11   6  208.21    9.84
   0 -11   5   72.82    2.94
   0  11  -5   79.58    2.80
   0  11  -5   68.74    5.26
   0 -11   5   71.75    3.04
   0  11  -5   74.21    2.67
   0  11  -5   79.64    2.72
   0 -11   5   65.11    5.30
   0  11  -5   75.14    2.59
   0  11  -5   75.20    2.60
   0  11  -4   83.54    2.84
   0  11  -4   84.06    2.67
   0  11  -4   78.60    2.66
   0 -11   4   80.30    5.59
   0  11  -4   80.44    2.64
   0  11  -4   79.33    2.73
   0  11  -4   80.43    2.71
   0 -11   4   73.46    6.17
   0 -11   4   72.26    2.94
   0  11  -4   66.01    5.13
   0 -11   4   78.52    5.77
   0  11  -3   21.52    2.85
   0  11  -3   17.57    1.21
   0  11  -3   19.71    1.23
   0 -11   3   16.47    2.50
   0  11  -3   18.76    1.30
   0 -11   3   20.50    1.57
   0 -11   3   17.74    3.45
   0 -11   3   20.80    3.11
   0  11  -3   19.38    1.38
   0  11  -3   19.20    1.34
   0  11  -3   18.51    1.26
   0  11  -3   17.83    1.28
   0 -11   2  161.01    8.11
   0  11  -2  175.46    4.17
   0 -11   2  162.20    9.01
   0  11  -2  165.02    4.21
   0  11  -2  179.56    8.11
   0 -11   2  163.99    8.06
   0  11  -2  167.67    4.12
   0 -11   1   14.06    3.04
   0  11  -1   17.69    2.58
   0 -11   1   18.46    2.79
   0 -11   1   16.51    2.55
   0 -11   1   19.16    3.50
   0 -11   0   50.96    5.17
   0 -11   0   46.79    4.80
   0 -11   0   49.83    4.43
   0 -11   0   46.09    4.89
   0 -11   0   53.46    4.51
   0  11   0   49.03    4.06
   0 -11  -1   54.15    4.34
   0  11   1   68.60    4.70
   0 -11  -1   54.86    5.11
   0 -11  -1   59.06    4.91
   0 -11  -1   56.12    5.20
   0 -11  -2  348.58   12.79
   0  11   2  383.47   11.62
   0 -11  -2  351.67   12.81
   0 -11  -2  355.84   11.47
   0 -11  -3   22.58    3.44
   0 -11  -3   17.69    2.44
   0  11   3   24.37    2.80
   0 -11  -3   21.48    3.24
   0  11   4   12.06    2.17
   0 -11  -4   10.18    2.29
   0 -11  -4   11.55    2.63
   0 -11  -4   15.09    2.20
   0 -11  -5   87.65    5.91
   0 -11  -5   93.76    6.27
   0 -11  -5   97.44    5.31
   0  11   5   96.10    5.61
   0 -11  -5   88.91    6.20
   0 -11  -6   82.77    4.77
   0 -11  -6   83.17    5.74
   0  11   6   83.57    5.27
   0  11   7  154.66    7.31
   0 -11  -7  142.37    7.59
   0  11   8    0.81    1.00
   0  11   8    0.28    0.61
   0  11   8    0.83    0.60
   0  11   8    0.11    0.62
   0 -11  -8   -0.10    1.47
   0  11   8    1.18    0.51
   0 -11  -8    1.98    0.96
   0 -11  -9  189.96    8.28
   0  11   9  180.53    4.40
   0  11   9  162.72    4.02
   0  11   9  168.54    4.21
   0  11   9  177.35    4.30
   0  11   9  175.24    8.03
   0 -11  -9  157.75    8.19
   0  11   9  176.09    4.54
   0  11   9  175.96    4.45
   0  11  10  280.36    5.75
   0  11  10  288.24    5.93
   0 -11 -10  297.38   10.82
   0  11  10  270.11    5.56
   0  11  10  290.36   10.70
   0  11  10  274.27    5.78
   0  11  10  269.91    5.79
   0  11  10  282.36    6.15
   0 -11 -10  268.24   10.91
   0  11  10  282.80    6.01
   0  11  11    3.29    1.29
   0 -11 -11    2.52    1.68
   0  11  11    2.53    0.68
   0  11  11    2.79    0.56
   0 -11 -11    3.31    1.59
   0  11  11    5.30    0.97
   0  11  11    2.48    0.65
   0  11  11    3.19    0.66
   0  11  11    3.09    0.67
   0  11  11    1.93    0.61
   0  11  11    3.42    0.69
   0  11  12  109.62    3.31
   0  11  12  102.42    3.15
   0  11  12  107.59    3.05
   0  11  12  105.99    3.58
   0  11  12  112.76    3.39
   0  11  12  107.94    3.43
   0  11  12  122.23    6.88
   0 -11 -12  109.39    6.97
   0  11  12  105.35    3.20
   0  11  13    3.39    0.70
   0  11  13    5.20    0.92
   0  11  13    5.37    0.82
   0  11  13    5.15    0.77
   0  11  13    7.13    0.92
   0  11  13    7.10    1.10
   0 -11 -13    3.86    1.45
   0  11  14  340.14    7.17
   0 -11 -14  348.92   13.24
   0  11  14  334.75    6.54
   0  11  14  345.46    6.76
   0  11  14  326.69    6.56
   0  11  14  343.45    7.02
   0  11  14  342.07    6.66
   0  11  15  136.91    3.73
   0  11  15  146.81    3.90
   0  11  15  142.31    4.19
   0  11  15  141.96    3.77
   0  11  15  144.23    3.81
   0  11  15  146.13    4.12
   0  11  16  190.43    4.52
   0  11  16  197.47    4.82
   0  11  16  177.57    4.34
   0  11  16  188.79    4.38
   0  11  16  190.36    4.84
   0  11  16  194.16    4.47
   0  11  17    1.47    0.69
   0  11  17    2.02    0.59
   0  11  17   -0.47    0.77
   0  11  17    1.17    0.51
   0  11  17    0.31    0.70
   0  11  17    1.82    0.79
   0  11  18    1.12    0.63
   0  11  18    1.49    0.54
   0  11  18    0.71    0.64
   0  11  18   -0.63    0.78
   0  11  18    0.93    0.65
   0  11  18   -0.78    0.70
   0  11  19  254.73    5.18
   0  11  19  263.22    4.98
   0  11  19  248.85    4.77
   0  11  19  270.24    5.04
   0  11  19  274.26    5.22
   0  11  19  272.03    4.82
   0  11  20   66.87    1.85
   0  11  20   66.89    1.96
   0  11  20   70.41    2.11
   0  11  20   68.90    2.06
   0  11  20   70.43    2.05
   0  11  21   -0.09    0.33
   0  11  21   -0.32    0.38
   0  11  21   -0.10    0.15
   0  11  21    0.59    0.40
   0 -12  15   28.28    1.18
   0  12 -15   30.02    1.07
   0 -12  15   27.94    0.99
   0 -12  14   68.74    2.13
   0 -12  14   67.49    1.86
   0  12 -14   71.85    2.00
   0  12 -14   63.62    1.96
   0 -12  13   11.09    0.87
   0  12 -13   12.17    0.97
   0 -12  13   13.11    1.11
   0 -12  13   12.89    0.91
   0  12 -13   12.65    0.98
   0  12 -12   49.33    1.94
   0 -12  12   46.72    1.81
   0 -12  12   48.26    1.79
   0 -12  12   46.78    1.88
   0  12 -12   51.46    1.97
   0 -12  12   50.09    2.16
   0  12 -11   41.01    1.89
   0 -12  11   38.89    1.82
   0 -12  11   38.35    2.08
   0 -12  11   38.89    1.68
   0  12 -11   37.34    1.80
   0 -12  11   38.27    1.81
   0 -12  10   43.82    1.93
   0  12 -10   42.60    1.97
   0 -12  10   40.26    2.20
   0 -12  10   42.86    2.27
   0  12 -10   40.13    1.90
   0  12 -10   41.46    1.99
   0 -12  10   38.57    1.97
   0 -12  10   42.81    1.97
   0 -12  10   41.13    1.77
   0  12  -9    4.71    0.82
   0 -12   9    4.79    0.72
   0 -12   9    4.26    0.90
   0  12  -9    4.90    0.92
   0 -12   9    3.85    1.03
   0 -12   9    4.16    1.12
   0 -12   9    4.32    0.77
   0  12  -9    5.12    0.97
   0  12  -9    3.49    0.85
   0 -12   8   97.97    3.09
   0 -12   8   93.61    3.57
   0 -12   8   94.05    3.55
   0  12  -8   94.40    3.09
   0 -12   8   97.89    2.86
   0  12  -8   95.02    2.97
   0  12  -8   94.23    3.04
   0  12  -8   89.95    2.99
   0  12  -8   98.47    3.24
   0  12  -7   53.54    2.26
   0 -12   7   56.30    2.58
   0 -12   7   55.67    2.73
   0 -12   7   56.93    2.81
   0  12  -7   55.66    2.29
   0 -12   7   56.15    2.08
   0 -12   7   56.08    2.32
   0  12  -7   53.57    2.30
   0  12  -7   55.51    2.29
   0  12  -7   56.57    2.45
   0  12  -7   56.40    2.41
   0  12  -6  149.71    3.95
   0  12  -6  153.74    4.08
   0 -12   6  148.47    4.74
   0 -12   6  150.75    4.43
   0 -12   6  149.66    4.62
   0  12  -6  141.52    3.94
   0  12  -6  149.46    4.18
   0 -12   6  147.85    3.99
   0  12  -6  151.03    3.93
   0  12  -5  124.45    3.74
   0  12  -5  120.49    3.60
   0  12  -5  122.71    3.43
   0  12  -5  124.21    3.50
   0 -12   5  119.62    4.11
   0  12  -5  121.43    3.54
   0 -12   5  127.05    4.01
   0  12  -4   92.39    3.09
   0 -12   4   81.55    6.02
   0  12  -4   97.73    6.32
   0 -12   4   88.70    3.49
   0  12  -4   95.34    3.15
   0  12  -4   93.75    2.91
   0 -12   4   90.92    6.19
   0  12  -4   94.83    3.01
   0 -12   4   93.11    3.40
   0 -12   3   19.29    3.65
   0 -12   3   24.22    1.72
   0  12  -3   20.91    1.29
   0  12  -3   21.38    3.00
   0  12  -3   22.73    1.49
   0  12  -3   21.75    1.39
   0  12  -3   22.65    1.49
   0 -12   3   22.14    3.17
   0  12  -3   21.44    1.45
   0 -12   2    6.46    1.66
   0 -12   2    9.42    3.16
   0  12  -2    9.66    1.02
   0 -12   2    8.93    1.20
   0  12  -2    7.40    0.85
   0  12  -2    7.40    0.89
   0  12  -2    7.72    0.86
   0  12  -2    6.77    0.96
   0  12  -2    6.50    0.85
   0 -12   2    7.16    1.82
   0  12  -2    7.18    1.77
   0  12  -1  335.26    6.73
   0  12  -1  318.46    6.54
   0 -12   1  337.17   13.82
   0  12  -1  339.79    6.33
   0  12  -1  365.54   12.15
   0  12  -1  338.08    6.25
   0  12  -1  331.84    6.61
   0  12  -1  349.28    6.65
   0 -12   1  328.62   12.41
   0 -12   1  322.71   12.11
   0 -12   0   13.46    3.45
   0  12   0   12.57    1.11
   0 -12   0   11.64    3.16
   0  12   0   11.76    1.09
   0 -12   0   12.80    2.39
   0  12   0   11.31    1.07
   0 -12   0   14.29    2.63
   0  12   0   11.97    1.11
   0  12   0   14.00    1.04
   0  12   0    8.45    1.85
   0  12   1   23.14    1.43
   0  12   1   24.10    1.49
   0 -12  -1   21.38    2.99
   0 -12  -1   22.58    3.75
   0 -12  -1   23.97    3.40
   0  12   1   23.48    1.49
   0  12   1   30.53    3.47
   0 -12  -1   26.74    3.98
   0 -12  -1   21.36    3.94
   0  12   2    3.17    0.69
   0 -12  -2    1.67    1.17
   0 -12  -2    1.57    1.46
   0  12   2    2.98    0.67
   0 -12  -2    1.99    1.95
   0  12   2    1.53    1.07
   0  12   2    1.57    0.49
   0 -12  -2    3.00    2.37
   0  12   3  198.42    4.49
   0  12   3  195.65    4.58
   0 -12  -3  199.31    9.98
   0 -12  -3  210.55    9.91
   0  12   3  225.94    9.05
   0 -12  -3  202.50    9.93
   0 -12  -3  201.35    8.71
   0  12   3  181.39    4.48
   0 -12  -4  138.25    8.25
   0 -12  -4  150.30    7.30
   0  12   4  138.46    3.73
   0  12   4  144.24    7.24
   0 -12  -4  135.62    8.06
   0  12   4  137.41    3.58
   0  12   4  136.60    3.67
   0  12   5   27.49    1.57
   0 -12  -5   30.08    3.15
   0  12   5   32.39    3.48
   0  12   5   30.35    1.81
   0  12   5   28.10    1.47
   0 -12  -5   24.95    3.83
   0  12   5   30.01    1.59
   0 -12  -5   25.74    3.74
   0  12   6   62.51    2.40
   0  12   6   62.58    4.78
   0  12   6   65.55    2.62
   0 -12  -6   60.99    5.43
   0  12   6   63.11    2.22
   0  12   6   62.82    2.28
   0  12   6   64.17    2.49
   0  12   6   64.50    2.55
   0 -12  -6   66.35    5.81
   0  12   6   62.75    2.45
   0  12   7    4.46    0.78
   0 -12  -7    2.29    1.96
   0 -12  -7    6.44    2.00
   0 -12  -7    4.11    1.99
   0  12   7    4.57    0.78
   0  12   7    5.84    0.96
   0  12   7    6.62    0.76
   0  12   7    5.37    0.78
   0  12   7    5.72    0.83
   0  12   7    5.18    1.46
   0  12   7    3.31    0.66
   0  12   8   97.48    6.04
   0  12   8   89.09    2.92
   0 -12  -8   92.80    6.80
   0  12   8   82.73    2.69
   0  12   8   93.22    3.14
   0  12   8   87.39    2.85
   0 -12  -8   92.85    6.43
   0  12   8   91.38    3.07
   0  12   8   93.47    3.03
   0  12   8   93.41    3.15
   0  12   9   -0.12    0.47
   0  12   9   -0.31    1.04
   0  12   9   -0.32    0.67
   0  12   9    0.03    0.49
   0  12   9    0.13    0.62
   0  12   9    0.16    0.51
   0 -12  -9   -0.09    1.21
   0  12   9    0.28    0.63
   0  12  10  221.10    5.34
   0  12  10  210.69    5.17
   0  12  10  218.95    4.84
   0  12  10  205.68    4.94
   0  12  10  210.09    4.98
   0  12  10  230.14    9.61
   0  12  10  209.61    4.72
   0  12  10  217.05    4.94
   0 -12 -10  217.31   10.01
   0  12  10  221.83    5.13
   0  12  11  158.33    4.19
   0 -12 -11  149.03    8.30
   0  12  11  153.17    4.18
   0  12  11  166.07    4.55
   0  12  11  156.15    4.06
   0  12  11  158.01    4.32
   0  12  11  164.05    3.98
   0  12  11  149.32    3.88
   0  12  11  153.76    4.14
   0 -12 -12   -0.40    1.52
   0  12  12    1.41    0.62
   0  12  12    0.85    0.52
   0  12  12   -0.69    0.98
   0  12  12    0.43    0.41
   0  12  12    0.26    0.77
   0  12  12    0.15    0.82
   0  12  12    0.41    0.61
   0  12  12    0.59    0.58
   0  12  13   47.91    2.09
   0  12  13   46.99    2.12
   0  12  13   50.92    2.45
   0  12  13   48.84    2.16
   0  12  13   48.22    2.25
   0  12  13   49.34    1.93
   0  12  13   50.29    2.13
   0  12  13   47.88    2.25
   0 -12 -13   49.56    4.81
   0  12  14  498.96    8.65
   0  12  14  472.88    8.43
   0  12  14  489.62    8.54
   0  12  14  501.52    9.18
   0  12  14  489.16    8.86
   0  12  14  473.58    8.33
   0  12  14  500.85    8.87
   0  12  15   13.70    1.18
   0  12  15   15.48    1.38
   0  12  15   13.69    1.24
   0  12  15   14.17    1.14
   0  12  15   15.50    1.24
   0  12  15   14.19    1.43
   0  12  15   12.91    1.12
   0  12  16   13.15    1.33
   0  12  16   12.12    1.06
   0  12  16   15.24    1.18
   0  12  16   12.58    1.08
   0  12  16   13.86    1.19
   0  12  16   14.54    1.11
   0  12  17  127.48    3.32
   0  12  17  127.37    3.27
   0  12  17  132.94    3.68
   0  12  17  125.92    3.23
   0  12  17  127.66    3.39
   0  12  17  125.21    3.25
   0  12  17  129.34    3.48
   0  12  18  140.46    3.30
   0  12  18  149.36    3.72
   0  12  18  147.75    3.42
   0  12  18  143.84    3.39
   0  12  18  141.17    3.40
   0  12  18  148.68    3.60
   0  12  19    8.94    0.75
   0  12  19    7.85    0.78
   0  12  19   10.75    0.95
   0  12  19    9.41    0.86
   0  12  19    7.45    0.71
   0  12  19    8.85    0.72
   0  12  20   46.35    1.39
   0  12  20   47.55    1.58
   0  12  20   44.64    1.45
   0  12  20   46.27    1.51
   0  12  20   45.90    1.55
   0  12  21   34.32    1.13
   0  12  21   32.67    1.03
   0 -13  14   34.11    1.26
   0  13 -14   34.08    1.10
   0  13 -14   35.61    1.16
   0 -13  13  110.61    2.72
   0 -13  13  103.25    2.22
   0  13 -13  112.15    2.56
   0 -13  12   78.53    2.46
   0 -13  12   76.30    2.12
   0  13 -12   71.32    2.14
   0 -13  12   75.84    2.00
   0  13 -12   81.53    2.28
   0  13 -11   18.11    0.96
   0  13 -11   19.95    1.24
   0 -13  11   16.59    1.07
   0 -13  11   18.29    1.37
   0  13 -11   19.12    1.17
   0 -13  11   17.49    1.10
   0 -13  11   18.65    1.02
   0  13 -10   60.01    2.21
   0 -13  10   53.67    2.18
   0 -13  10   58.32    2.46
   0 -13  10   60.65    1.95
   0 -13  10   52.05    2.03
   0  13 -10   56.65    2.08
   0 -13   9  105.34    2.92
   0 -13   9  101.39    2.70
   0  13  -9   97.94    2.92
   0 -13   9   95.72    2.96
   0 -13   9  101.97    3.48
   0 -13   9  106.94    3.56
   0 -13   9   96.28    3.20
   0  13  -9  101.66    3.05
   0  13  -8    0.60    0.64
   0 -13   8    0.23    0.46
   0 -13   8   -0.35    0.95
   0 -13   8   -0.49    0.98
   0  13  -8   -0.26    0.61
   0  13  -8    0.58    0.53
   0 -13   8   -0.01    0.67
   0 -13   8    0.85    0.42
   0  13  -7   31.55    1.71
   0  13  -7   34.97    1.79
   0 -13   7   31.70    2.09
   0  13  -7   31.97    1.66
   0 -13   7   28.97    2.05
   0 -13   6   38.81    2.39
   0 -13   6   38.86    2.11
   0  13  -6   38.22    1.86
   0  13  -6   36.53    1.78
   0  13  -6   38.67    2.04
   0  13  -6   38.28    1.94
   0 -13   6   38.92    2.32
   0  13  -5   55.45    2.27
   0 -13   5   60.24    3.04
   0 -13   5   57.46    2.62
   0  13  -5   63.59    2.31
   0  13  -5   62.23    2.58
   0  13  -5   59.47    2.45
   0 -13   5   57.67    2.86
   0  13  -5   60.38    2.42
   0  13  -4   72.13    2.75
   0  13  -4   71.90    2.62
   0 -13   4   74.49    3.01
   0 -13   4   72.30    3.18
   0  13  -4   78.76    2.58
   0  13  -4   77.46    2.86
   0  13  -3    9.78    1.08
   0  13  -3    6.39    0.82
   0 -13   3    6.44    1.04
   0 -13   3    7.85    2.27
   0 -13   3    6.44    1.26
   0  13  -3    6.09    0.92
   0  13  -2    4.54    0.83
   0  13  -2    3.50    0.77
   0 -13   2    5.90    3.02
   0 -13   2    5.28    1.08
   0  13  -2    4.87    0.76
   0 -13   1   14.13    2.60
   0 -13   1   11.40    3.46
   0 -13   1   10.63    2.25
   0  13  -1   13.35    1.05
   0  13  -1   13.80    1.25
   0 -13   1   18.35    1.61
   0  13  -1   17.24    2.75
   0  13  -1   14.09    1.23
   0  13  -1   12.73    1.20
   0  13   0   16.60    1.32
   0 -13   0   14.11    2.59
   0  13   0   22.66    3.10
   0  13   0   15.55    1.31
   0  13   0   14.44    1.29
   0 -13   0   18.53    2.98
   0 -13   0   14.40    3.61
   0 -13  -1  385.67   14.15
   0 -13  -1  364.03   14.53
   0  13   1  378.09    7.39
   0  13   1  365.68    7.18
   0 -13  -1  376.26   14.99
   0 -13  -1  389.89   13.47
   0  13   1  400.94   13.05
   0  13   1  375.56    7.23
   0 -13  -2   36.30    4.15
   0 -13  -2   38.57    4.89
   0  13   2   35.12    1.86
   0 -13  -2   36.71    4.79
   0  13   2   37.25    1.86
   0 -13  -2   35.27    3.89
   0  13   2   35.30    1.90
   0  13   2   44.62    4.22
   0 -13  -2   33.84    4.83
   0 -13  -3   -0.18    0.80
   0 -13  -3    0.64    1.13
   0 -13  -3    3.67    2.42
   0  13   3    1.10    0.51
   0 -13  -3    0.54    1.90
   0 -13  -3   -1.74    3.23
   0  13   3    1.13    0.56
   0  13   3   -0.48    1.27
   0  13   3    1.92    0.68
   0 -13  -4   14.14    2.43
   0  13   4   16.53    1.28
   0 -13  -4   17.43    3.44
   0  13   4   16.25    1.30
   0  13   4   14.58    1.15
   0 -13  -4   12.81    2.53
   0  13   4   20.92    2.84
   0 -13  -4   20.46    3.46
   0 -13  -5  315.24   13.20
   0  13   5  313.49    6.13
   0  13   5  300.60    6.26
   0  13   5  311.40    6.25
   0  13   5  347.73   11.88
   0 -13  -5  313.11   11.21
   0 -13  -5  300.08   12.67
   0 -13  -5  341.71   13.46
   0  13   6   64.76    2.77
   0 -13  -6   64.61    5.85
   0 -13  -6   69.00    5.97
   0  13   6   67.40    2.55
   0  13   6   63.20    2.39
   0  13   6   64.99    2.33
   0  13   6   64.09    2.49
   0 -13  -6   60.30    5.75
   0  13   6   76.70    5.45
   0  13   7   -0.04    0.39
   0  13   7    0.68    0.82
   0  13   7   -0.32    1.19
   0 -13  -7    0.50    2.17
   0  13   7   -0.60    0.52
   0  13   7    0.64    0.51
   0  13   7   -0.42    0.77
   0 -13  -7    0.17    1.71
   0  13   7    3.51    1.24
   0  13   8   56.51    2.43
   0 -13  -8   49.04    4.74
   0  13   8   53.79    2.27
   0  13   8   61.17    4.90
   0  13   8   54.78    2.53
   0  13   8   53.07    2.17
   0 -13  -8   53.82    5.40
   0  13   8   58.87    2.54
   0 -13  -8   53.60    5.38
   0  13   9  129.36    3.93
   0  13   9  132.79    3.66
   0  13   9  133.48    3.88
   0  13   9  125.39    3.77
   0  13   9  139.26    4.00
   0 -13  -9  124.30    7.63
   0  13   9  140.69    3.78
   0 -13  -9  120.57    7.83
   0 -13  -9  127.21    8.16
   0  13   9  129.69    3.65
   0  13  10   87.01    2.96
   0  13  10   87.40    2.80
   0 -13 -10   86.83    6.67
   0 -13 -10   92.19    6.51
   0  13  10   89.89    3.09
   0  13  10   90.17    3.20
   0  13  10   92.46    3.26
   0 -13 -10   88.36    6.80
   0  13  10   91.36    2.98
   0  13  10   93.49    2.95
   0  13  10   91.02    3.13
   0  13  10   87.93    2.93
   0 -13 -11    3.13    1.58
   0  13  11    2.88    0.66
   0  13  11    4.08    0.72
   0  13  11    3.81    0.77
   0  13  11    3.16    0.83
   0  13  11    4.23    0.91
   0  13  11    4.72    0.85
   0  13  11    2.94    0.69
   0 -13 -11    0.01    1.77
   0  13  11    3.27    0.85
   0  13  11    2.36    0.81
   0  13  12   92.69    3.31
   0  13  12   90.37    2.82
   0  13  12   88.72    3.00
   0 -13 -12   85.05    6.29
   0  13  12   87.05    2.90
   0  13  12   92.09    2.79
   0  13  12   87.87    2.87
   0  13  12   88.93    3.00
   0 -13 -12   85.76    6.65
   0  13  12   89.02    3.12
   0  13  12   91.22    3.07
   0  13  13    7.81    0.99
   0  13  13    8.44    1.05
   0  13  13    8.40    0.83
   0  13  13    9.46    1.01
   0  13  13    7.31    1.12
   0  13  13    8.89    1.06
   0  13  13    9.74    1.00
   0  13  13    8.92    1.06
   0  13  14   -0.92    0.86
   0  13  14    0.74    0.71
   0  13  14    1.10    0.66
   0  13  14    0.38    0.67
   0  13  14    0.37    0.87
   0  13  14    0.84    0.67
   0  13  14    0.33    0.52
   0  13  15   60.09    2.20
   0  13  15   61.06    2.20
   0  13  15   61.87    2.32
   0  13  15   60.20    2.31
   0  13  15   63.76    2.46
   0  13  15   64.56    2.64
   0  13  16  148.86    3.57
   0  13  16  148.03    3.64
   0  13  16  154.06    3.85
   0  13  16  152.92    3.86
   0  13  16  153.99    3.71
   0  13  16  146.81    3.53
   0  13  16  159.39    4.15
   0  13  17    3.57    0.58
   0  13  17    4.58    0.75
   0  13  17    4.27    0.61
   0  13  17    4.21    0.71
   0  13  17    2.94    0.66
   0  13  17    3.41    0.64
   0  13  17    2.13    0.63
   0  13  17    4.85    0.89
   0  13  18   55.43    1.95
   0  13  18   56.56    1.83
   0  13  18   57.53    2.11
   0  13  18   56.31    1.76
   0  13  18   55.17    1.89
   0  13  18   55.20    1.84
   0  13  19  123.28    2.86
   0  13  19  124.13    2.66
   0  13  19  127.73    2.99
   0  13  19  124.74    2.55
   0  13  19  121.15    2.70
   0  13  20   19.21    0.83
   0  13  20   17.80    0.87
   0 -14  13    0.61    0.31
   0  14 -13    1.03    0.29
   0  14 -12   38.09    1.33
   0 -14  12   36.22    1.41
   0  14 -12   34.58    1.14
   0 -14  11   19.37    0.97
   0 -14  11   21.98    1.26
   0  14 -11   20.48    0.99
   0  14 -11   22.18    1.15
   0 -14  11   20.75    0.94
   0 -14  10   13.27    0.95
   0  14 -10   15.30    0.91
   0 -14  10   15.41    1.20
   0 -14  10   14.01    0.89
   0  14 -10   16.89    1.08
   0 -14   9   22.55    1.51
   0  14  -9   22.78    1.32
   0 -14   9   21.89    1.51
   0 -14   9   19.14    1.15
   0 -14   9   21.79    1.37
   0 -14   8   17.84    1.52
   0 -14   8   16.88    1.51
   0 -14   8   17.47    1.17
   0  14  -8   17.23    1.22
   0 -14   8   16.02    1.35
   0 -14   7   78.82    2.98
   0 -14   7   83.13    3.21
   0 -14   7   80.41    3.04
   0  14  -7   80.17    2.63
   0 -14   7   79.58    2.73
   0  14  -7   81.95    2.63
   0 -14   6   28.22    2.05
   0  14  -6   25.63    1.51
   0 -14   6   30.33    2.01
   0  14  -6   26.21    1.58
   0 -14   5  217.96    5.57
   0  14  -5  219.75    4.78
   0 -14   5  222.76    5.30
   0  14  -5  222.50    4.65
   0 -14   5  213.02    5.75
   0  14  -5  222.03    5.05
   0  14  -4   12.86    1.07
   0 -14   4   10.18    1.13
   0 -14   4   12.18    1.44
   0  14  -4   11.46    1.21
   0 -14   3   26.73    1.99
   0  14  -3   26.84    1.47
   0  14  -3   27.42    1.72
   0 -14   3   27.38    1.79
   0 -14   2  139.39    9.19
   0 -14   2  137.03    8.07
   0 -14   2  150.00    4.35
   0 -14   2  144.71    4.53
   0  14  -2  145.53    4.12
   0  14  -1  157.37    4.22
   0 -14   1  152.27    4.44
   0  14  -1  147.45    4.07
   0 -14   1  144.16    9.42
   0  14   0  152.94    4.18
   0  14   0  153.04    4.12
   0 -14   0  159.42    4.57
   0 -14   0  152.98    9.76
   0  14   1   32.05    1.83
   0  14   1   30.74    1.85
   0  14   1   32.46    1.79
   0 -14  -1   34.73    4.98
   0 -14  -2  225.82   11.41
   0  14   2  230.31    5.27
   0  14   2  224.99    5.20
   0 -14  -2  217.99   11.59
   0  14   2  234.63    5.41
   0 -14  -3    5.30    2.53
   0  14   3    3.22    0.78
   0  14   3    3.06    0.75
   0 -14  -3    0.08    2.61
   0 -14  -3   -0.67    2.16
   0  14   3    3.28    0.73
   0 -14  -4   33.30    4.51
   0  14   4   32.12    1.77
   0  14   4   29.58    1.73
   0 -14  -4   29.68    4.46
   0  14   4   30.80    1.69
   0 -14  -4   28.02    4.38
   0 -14  -5   20.34    3.58
   0  14   5   21.59    1.48
   0 -14  -5   17.11    3.53
   0  14   5   22.63    1.47
   0  14   5   21.16    1.39
   0  14   6    6.77    0.86
   0  14   6    5.91    0.75
   0 -14  -6    8.34    2.86
   0  14   6    7.00    0.95
   0 -14  -6    8.01    2.43
   0 -14  -7    3.89    2.28
   0  14   7    1.37    0.45
   0  14   7    3.07    0.75
   0  14   7    1.87    0.52
   0 -14  -7    3.63    1.93
   0  14   7    1.52    0.59
   0  14   8   12.16    1.42
   0  14   8   11.20    1.13
   0 -14  -8    9.43    2.73
   0  14   8   10.07    1.05
   0 -14  -8   14.58    2.93
   0 -14  -9   29.61    4.03
   0  14   9   29.49    1.58
   0 -14  -9   22.52    3.60
   0  14   9   29.52    1.96
   0  14   9   30.85    1.72
   0  14   9   28.58    1.64
   0  14   9   26.18    1.71
   0  14   9   32.19    1.72
   0  14  10  135.61    3.68
   0  14  10  139.65    3.69
   0 -14 -10  129.65    8.42
   0  14  10  129.12    3.60
   0  14  10  132.99    3.90
   0  14  10  131.69    3.97
   0  14  10  137.84    3.98
   0 -14 -10  125.80    7.98
   0  14  10  133.71    3.63
   0  14  11   78.22    2.96
   0  14  11   84.02    2.70
   0  14  11   82.07    3.00
   0  14  11   82.55    2.94
   0  14  11   79.02    2.70
   0 -14 -11   74.20    6.03
   0  14  11   78.71    2.69
   0 -14 -12    8.60    2.15
   0  14  12   10.78    1.22
   0  14  12   11.17    1.03
   0  14  12   10.71    0.95
   0  14  12    9.86    0.98
   0  14  12   10.16    1.23
   0  14  13  109.80    3.36
   0  14  13  111.87    3.53
   0  14  13  106.14    3.04
   0  14  13  111.42    3.25
   0  14  13  107.11    2.89
   0 -14 -13  103.36    6.92
   0  14  13  104.16    3.05
   0  14  14  115.11    3.24
   0  14  14  119.02    3.41
   0  14  14  112.83    3.10
   0  14  14  115.30    3.07
   0  14  14  120.14    3.60
   0  14  14  112.87    2.81
   0  14  15    1.32    0.82
   0  14  15    1.50    0.49
   0  14  15    3.36    0.82
   0  14  15    1.28    0.51
   0  14  15    1.51    0.73
   0  14  16  112.57    3.25
   0  14  16  108.82    2.77
   0  14  16  110.91    2.91
   0  14  16  110.37    3.04
   0  14  16  112.53    2.76
   0  14  16  112.05    3.05
   0  14  17  255.12    4.74
   0  14  17  271.15    5.25
   0  14  17  260.53    4.95
   0  14  17  257.15    4.58
   0  14  17  270.66    4.97
   0  14  17  258.28    4.55
   0  14  18  112.77    2.64
   0  14  18  109.80    2.56
   0  14  18  111.16    2.34
   0  14  18  112.03    2.70
   0  14  18  119.66    2.91
   0  14  19   50.38    1.63
   0  14  19   49.74    1.51
   0  14  19   50.70    1.41
   0  15 -11   45.64    1.35
   0 -15  11   41.81    1.42
   0  15 -10   79.02    1.82
   0 -15  10   74.75    1.95
   0 -15  10   81.14    2.29
   0 -15   9   13.82    0.95
   0 -15   9   14.44    1.08
   0  15  -9   15.93    0.97
   0  15  -9   15.51    0.89
   0  15  -8    3.78    0.60
   0  15  -8    4.09    0.50
   0 -15   8    3.31    0.48
   0  15  -8    4.52    0.66
   0 -15   8    3.82    0.82
   0 -15   8    2.45    0.72
   0 -15   8    4.05    0.70
   0 -15   7  115.62    3.37
   0 -15   7  110.98    3.29
   0  15  -7  115.04    2.94
   0 -15   7  104.23    2.75
   0 -15   7  112.82    3.49
   0 -15   6   73.43    2.55
   0 -15   6   72.21    2.76
   0 -15   6   72.62    2.95
   0  15  -6   72.03    2.44
   0  15  -6   75.35    2.36
   0  15  -5    9.18    1.01
   0 -15   5   11.29    1.45
   0 -15   5   10.80    1.31
   0  15  -5    9.26    0.90
   0  15  -4   77.43    2.47
   0 -15   4   81.00    2.80
   0 -15   4   81.87    3.34
   0  15  -4   82.04    2.79
   0 -15   4   75.92    3.00
   0  15  -3  124.45    3.59
   0  15  -3  125.95    3.21
   0 -15   3  119.85    3.93
   0 -15   3  121.92    3.63
   0  15  -2   19.57    1.21
   0 -15   2   16.63    2.78
   0 -15   2   20.70    1.49
   0  15  -2   18.71    1.44
   0 -15   2   16.99    1.59
   0 -15   1   14.23    1.34
   0  15  -1   12.86    0.97
   0  15  -1   11.88    1.24
   0 -15   1   12.44    3.28
   0 -15   1   12.60    1.46
   0 -15   1   10.45    2.50
   0 -15   0   55.90    2.50
   0  15   0   53.56    2.38
   0 -15   0   56.00    6.07
   0  15   0   53.08    2.25
   0  15   1  166.42    4.37
   0 -15  -1  156.03    9.82
   0  15   1  161.85    4.20
   0 -15  -1  171.33    4.64
   0  15   2   30.02    1.70
   0 -15  -2   34.54    2.02
   0  15   2   30.39    1.75
   0 -15  -2   31.29    4.76
   0  15   3   74.52    2.71
   0  15   3   71.43    2.63
   0  15   3   77.45    2.81
   0 -15  -3   72.71    6.76
   0 -15  -4   38.94    4.96
   0  15   4   40.19    1.99
   0  15   4   38.47    1.91
   0  15   4   38.69    1.91
   0 -15  -4   33.62    4.52
   0 -15  -4   36.92    4.86
   0 -15  -5  140.62    9.19
   0 -15  -5  139.15    8.76
   0  15   5  131.37    3.68
   0 -15  -5  137.31    8.98
   0  15   5  136.17    3.76
   0  15   5  134.10    3.63
   0 -15  -6   30.14    4.14
   0  15   6   35.55    1.71
   0 -15  -6   32.57    4.54
   0 -15  -6   29.45    4.31
   0  15   6   34.35    1.74
   0  15   6   33.44    1.75
   0  15   7    4.41    0.66
   0 -15  -7    3.82    1.91
   0  15   7    4.90    0.74
   0  15   7    4.35    0.79
   0  15   7    5.02    0.77
   0  15   8   34.90    1.83
   0 -15  -8   32.02    4.10
   0  15   8   32.59    1.70
   0  15   8   35.42    1.63
   0  15   9  119.46    3.55
   0  15   9  117.48    3.33
   0  15   9  127.27    3.49
   0  15   9  124.12    3.47
   0  15  10   12.33    1.07
   0  15  10   11.69    1.18
   0  15  10   11.56    1.08
   0  15  10   13.67    1.13
   0  15  11   71.02    2.40
   0 -15 -11   61.29    5.33
   0  15  11   65.63    2.31
   0  15  11   67.83    2.41
   0  15  11   71.11    2.66
   0  15  11   73.97    2.77
   0  15  12   26.99    1.42
   0  15  12   26.02    1.42
   0  15  12   27.38    1.67
   0  15  12   27.39    1.41
   0  15  13   32.88    1.80
   0  15  13   31.20    1.76
   0  15  13   30.75    1.46
   0  15  13   30.73    1.50
   0  15  13   30.55    1.39
   0  15  14   44.92    1.68
   0  15  14   42.41    1.68
   0  15  14   48.29    2.11
   0  15  14   44.13    1.54
   0  15  14   48.30    2.03
   0  15  15   13.35    0.88
   0  15  15   14.20    1.04
   0  15  15   15.20    1.16
   0  15  15   13.19    0.90
   0  15  15   13.94    1.19
   0  15  16   15.63    0.88
   0  15  16   17.47    1.22
   0  15  16   17.44    1.14
   0  15  16   16.98    1.07
   0  15  16   17.07    0.88
   0  15  17    1.61    0.60
   0  15  17    2.83    0.60
   0  15  18   95.30    2.35
   0  15  18   94.82    2.16
   0  15  19   75.48    1.77
   0  16  -9   20.05    0.78
   0 -16   9   18.01    0.80
   0 -16   9   20.77    1.00
   0 -16   8   58.42    1.89
   0  16  -8   59.66    1.68
   0  16  -8   60.01    1.68
   0 -16   7    0.43    0.53
   0 -16   7    0.94    0.56
   0  16  -7    1.12    0.45
   0 -16   7    0.84    0.61
   0  16  -7    0.91    0.45
   0 -16   6   31.33    1.62
   0  16  -6   31.39    1.32
   0 -16   6   30.00    1.58
   0 -16   6   29.46    1.67
   0  16  -5   95.06    2.51
   0 -16   5   97.80    2.83
   0 -16   5   98.20    3.02
   0 -16   5   99.59    3.23
   0 -16   4   18.12    1.41
   0  16  -4   17.11    1.21
   0  16  -4   17.94    1.06
   0 -16   4   16.72    1.52
   0  16  -3   77.93    2.63
   0  16  -3   75.38    2.20
   0 -16   3   73.15    2.99
   0 -16   3   71.89    2.74
   0  16  -2   55.39    1.85
   0 -16   2   49.94    2.36
   0 -16   2   55.09    2.16
   0  16  -2   57.80    2.30
   0  16  -1   19.66    1.46
   0 -16   1   20.14    1.39
   0 -16   1   14.85    2.51
   0 -16   1   19.16    1.54
   0  16   0   -0.38    0.81
   0 -16   0    0.57    0.79
   0 -16   0   -0.48    0.65
   0 -16   0    3.34    1.46
   0 -16   0    0.77    1.51
   0 -16  -1   31.65    3.90
   0 -16  -1   32.72    1.79
   0  16   1   32.58    1.77
   0 -16  -1   34.41    4.63
   0 -16  -1   31.82    1.97
   0  16   2   94.01    2.91
   0  16   2   96.22    3.05
   0 -16  -2   91.74    7.27
   0 -16  -2   95.53    3.16
   0  16   3   17.77    1.25
   0 -16  -3   15.89    3.58
   0  16   3   19.60    1.37
   0 -16  -3   18.83    1.46
   0  16   4   33.23    1.67
   0  16   4   33.79    1.72
   0 -16  -4   35.16    4.66
   0 -16  -5   25.02    4.16
   0  16   5   24.53    1.45
   0 -16  -5   27.01    3.82
   0  16   5   25.04    1.45
   0 -16  -6   47.54    4.92
   0  16   6   43.05    1.88
   0 -16  -6   37.59    4.72
   0  16   6   43.60    1.84
   0  16   7   66.71    2.20
   0 -16  -7   67.69    6.05
   0 -16  -7   58.96    5.39
   0  16   7   64.29    2.30
   0  16   7   69.52    2.54
   0  16   8    1.23    0.61
   0 -16  -8    2.62    1.68
   0 -16  -8    1.56    1.83
   0  16   8    1.21    0.53
   0  16   8    0.20    0.46
   0  16   8    1.16    0.69
   0  16   9  158.11    3.85
   0  16   9  155.71    3.88
   0  16   9  151.09    3.66
   0 -16  -9  144.31    8.67
   0  16   9  167.91    3.93
   0  16  10   93.53    2.77
   0  16  10   91.26    2.64
   0  16  10   93.83    2.75
   0  16  10   91.05    2.85
   0  16  11    2.06    0.54
   0  16  11    2.02    0.58
   0  16  11    1.92    0.68
   0  16  11    1.94    0.54
   0  16  12   51.28    2.06
   0  16  12   49.16    1.76
   0  16  12   51.02    1.86
   0  16  12   50.61    1.81
   0  16  13   99.85    2.87
   0  16  13   97.73    2.45
   0  16  13   98.79    2.45
   0  16  13   94.21    2.53
   0  16  14    0.74    0.28
   0  16  14    1.46    0.63
   0  16  14    1.45    0.40
   0  16  14    1.41    0.38
   0  16  14    0.24    0.71
   0  16  15   88.26    2.14
   0  16  15   93.26    2.57
   0  16  15   96.49    2.52
   0  16  16  152.04    3.04
   0  16  16  143.16    3.13
   0  16  17   22.64    1.06
   0  16  17   23.56    0.99
   0  16  18    0.87    0.32
   0 -17   7   27.74    1.10
   0  17  -7   29.17    0.93
   0 -17   7   25.32    1.04
   0  17  -7   28.33    1.02
   0 -17   6    0.06    0.51
   0  17  -6    0.32    0.36
   0  17  -6    0.37    0.25
   0 -17   6   -0.04    0.41
   0 -17   6   -0.04    0.38
   0 -17   5   12.11    0.94
   0 -17   5   13.21    1.05
   0  17  -5   13.41    0.72
   0  17  -5   14.13    0.91
   0 -17   5   13.34    1.01
   0 -17   4   34.01    1.67
   0  17  -4   32.68    1.17
   0 -17   4   31.83    1.66
   0 -17   4   32.21    1.52
   0  17  -4   34.05    1.45
   0 -17   4   30.43    1.39
   0 -17   3   34.76    1.67
   0  17  -3   35.81    1.27
   0 -17   3   34.65    1.81
   0  17  -3   37.07    1.26
   0 -17   2   14.67    1.35
   0 -17   2   12.84    1.11
   0  17  -2   13.53    1.10
   0  17  -2   13.77    0.88
   0 -17   1  147.19    4.18
   0 -17   1  146.14    3.81
   0  17   0   88.83    2.71
   0 -17   0   81.12    2.78
   0 -17  -1   13.21    1.20
   0  17   1   15.06    1.18
   0  17   2   51.86    2.04
   0 -17  -2   46.73    2.12
   0 -17  -3   91.22    6.79
   0  17   3  102.22    2.77
   0 -17  -3   93.69    3.05
   0  17   3   99.73    2.87
   0  17   4   67.21    2.20
   0  17   4   72.73    2.38
   0  17   4   73.80    2.23
   0 -17  -4   63.26    5.67
   0  17   5   25.13    1.20
   0 -17  -5   22.14    3.53
   0  17   5   27.18    1.55
   0  17   5   23.52    1.26
   0  17   5   24.65    1.34
   0  17   6    5.29    0.67
   0  17   6    6.29    0.94
   0  17   6    5.16    0.66
   0  17   7   67.33    2.04
   0  17   7   64.16    2.09
   0  17   7   69.17    2.31
   0  17   7   69.69    2.38
   0  17   8   29.59    1.47
   0  17   8   27.77    1.30
   0  17   8   32.07    1.56
   0  17   9    0.92    0.58
   0  17   9    0.52    0.45
   0  17   9    0.86    0.38
   0  17  10   10.45    0.79
   0  17  10    9.53    0.83
   0  17  10    8.97    0.82
   0  17  11  103.47    2.62
   0  17  11  105.67    2.44
   0  17  11  105.16    2.65
   0  17  11  104.35    2.72
   0  17  12   -0.04    0.37
   0  17  12    0.27    0.36
   0  17  12   -0.11    0.49
   0  17  13    0.03    0.31
   0  17  13   -1.02    0.64
   0  17  13   -0.99    0.56
   0  17  13   -0.07    0.33
   0  17  14    2.65    0.53
   0  17  14    2.66    0.37
   0  17  14    2.20    0.47
   0  17  15   49.87    1.56
   0  17  15   50.48    1.57
   0  17  16    4.58    0.47
   0  17  16    5.32    0.52
   0  18  -5   11.70    0.64
   0 -18   5    9.45    0.57
   0 -18   5   10.91    0.67
   0  18  -4   39.28    1.29
   0 -18   4   35.74    1.25
   0 -18   4   34.98    1.40
   0 -18   4   37.54    1.40
   0 -18   3   13.65    0.99
   0 -18   3   12.69    0.76
   0  18  -3   15.36    0.88
   0 -18   3   15.25    0.89
   0 -18   3   14.36    1.00
   0 -18   2   48.79    1.67
   0 -18   2   50.61    1.93
   0  18  -2   48.13    1.33
   0 -18   1    0.36    0.64
   0  18  -1    0.12    0.41
   0 -18   1    0.29    0.44
   0  18  -1   -0.07    0.31
   0 -18   0   34.34    1.50
   0  18   0   37.71    1.47
   0  18   0   34.79    1.34
   0 -18   0   36.66    1.76
   0  18   1   92.79    2.39
   0  18   1   90.17    2.36
   0  18   1   94.65    2.52
   0  18   2   38.39    1.54
   0 -18  -2   37.04    1.59
   0  18   2   38.35    1.47
   0  18   2   40.37    1.59
   0  18   3    4.39    0.66
   0 -18  -3    3.08    0.59
   0  18   3    4.03    0.62
   0  18   3    4.80    0.56
   0  18   4   90.93    2.46
   0 -18  -4   85.93    2.53
   0  18   4   96.24    2.28
   0  18   4  101.05    2.64
   0  18   5   70.94    2.17
   0  18   5   66.83    1.98
   0  18   6    3.84    0.65
   0  18   6    2.66    0.64
   0  18   7    0.05    0.50
   0  18   7    0.77    0.43
   0  18   8   11.72    0.89
   0  18   8    9.19    0.72
   0  18   8   11.52    0.83
   0  18   9   25.64    1.16
   0  18   9   27.23    1.19
   0  18   9   27.72    1.25
   0  18  10    0.49    0.32
   0  18  10    0.52    0.37
   0  18  11   23.80    1.00
   0  18  11   22.29    1.00
   0  18  11   23.51    1.09
   0  18  12   23.19    0.90
   0  18  12   23.18    0.90
   0  18  12   22.50    0.91
   0  18  12   22.24    1.02
   0  18  13    4.37    0.45
   0  18  13    3.03    0.42
   0  18  14    0.25    0.30
   0 -19   2   51.22    1.48
   0 -19   2   52.36    1.49
   0  19  -2   53.42    1.33
   0  19  -1   44.29    1.25
   0 -19   1   41.45    1.42
   0 -19   1   41.69    1.42
   0  19   0   21.26    0.86
   0 -19   0   21.11    1.06
   0 -19  -1    2.17    0.53
   0  19   1    1.54    0.31
   0  19   1    1.34    0.31
   0  19   2   73.80    1.84
   0 -19  -2   73.41    2.19
   0  19   2   75.89    1.74
   0  19   3   37.46    1.11
   0  19   3   39.58    1.34
   0  19   3   38.03    1.31
   0 -19  -3   40.20    1.60
   0  19   4   17.09    0.91
   0  19   4   17.78    0.89
   0  19   5   34.67    1.24
   0  19   5   34.60    1.29
   0  19   6  114.08    2.55
   0  19   6  111.67    2.42
   0  19   7    1.79    0.37
   0  19   7    0.78    0.37
   0  19   8    7.45    0.55
   0  19   8    7.92    0.62
   0  19   9    2.94    0.40
   0  19   9    2.68    0.35
   0  19  10   61.12    1.51
   0  19  10   57.94    1.36
   0  19  11    3.56    0.33
  -1  19   9   13.78    0.64
  -1  19   8    1.57    0.32
  -1  19   8    1.56    0.29
  -1  19   7   12.63    0.69
  -1  19   7   12.21    0.65
  -1  19   6  158.31    2.88
  -1  19   6  160.78    2.85
  -1  19   5   73.24    1.76
   1 -19  -5   72.95    1.85
  -1  19   5   75.05    1.77
   1 -19  -4   -0.01    0.30
  -1  19   4    0.60    0.29
  -1  19   4   -0.52    0.36
  -1  19   3   80.36    1.83
   1 -19  -3   76.24    1.90
  -1  19   3   75.84    1.71
  -1  19   2  101.69    2.08
   1 -19  -2   93.56    2.12
  -1  19   2   88.86    1.82
   1 -19  -2   96.44    2.20
  -1  19   1   17.59    0.77
   1 -19  -1   15.86    0.77
   1 -19  -1   17.61    0.85
   1 -19   0    5.24    0.47
  -1  19   0    4.69    0.40
  -1  18  12   35.25    1.03
  -1  18  12   33.82    1.07
  -1  18  11    9.03    0.58
  -1  18  11    9.81    0.61
  -1  18  11    8.91    0.58
  -1  18  10    1.29    0.35
  -1  18  10    2.13    0.36
  -1  18  10    1.90    0.35
  -1  18   9    5.09    0.58
  -1  18   9    4.31    0.44
  -1  18   9    5.47    0.56
  -1  18   8   58.29    1.78
  -1  18   8   57.08    1.73
  -1  18   7  134.32    2.97
  -1  18   7  131.02    2.91
  -1  18   6    2.97    0.58
  -1  18   6    3.14    0.59
  -1  18   5   77.44    2.17
  -1  18   5   78.40    2.19
  -1  18   4  147.40    3.15
  -1  18   4  143.38    2.75
  -1  18   3   30.50    1.28
  -1  18   3   30.86    1.15
   1 -18  -2   15.51    1.12
  -1  18   2   14.76    0.88
  -1  18   2   15.14    0.84
  -1  18   1   76.55    1.97
   1 -18  -1   75.82    2.36
  -1  18   1   80.13    2.03
  -1  18   0   91.02    2.06
   1 -18   0   94.00    2.57
   1 -18   1    3.93    0.64
   1 -18   1    3.42    0.60
  -1  18  -1    3.43    0.48
   1 -18   2   33.48    1.34
   1 -18   2   34.15    1.38
   1 -18   2   32.29    1.26
  -1  18  -2   35.12    1.23
   1 -18   3   23.16    1.04
  -1  18  -3   24.93    0.98
   1 -18   3   25.98    1.12
  -1  18  -4    3.93    0.39
   1 -18   4    3.61    0.43
  -1  17  15   15.94    0.74
  -1  17  15   15.85    0.75
  -1  17  14   34.94    1.09
  -1  17  14   36.78    1.27
  -1  17  14   36.25    1.25
  -1  17  13    1.86    0.49
  -1  17  13    1.13    0.33
  -1  17  12    4.99    0.53
  -1  17  12    3.58    0.54
  -1  17  12    5.28    0.63
  -1  17  12    3.86    0.47
  -1  17  11    3.99    0.58
  -1  17  11    5.21    0.59
  -1  17  11    5.77    0.66
  -1  17  11    5.65    0.62
  -1  17  10   25.80    1.18
  -1  17  10   24.88    1.22
  -1  17  10   26.13    1.25
  -1  17  10   26.72    1.26
  -1  17   9    0.75    0.49
  -1  17   9    0.99    0.48
  -1  17   8   -1.03    0.62
  -1  17   8   -0.95    0.53
  -1  17   8    0.07    0.47
  -1  17   7   25.75    1.20
  -1  17   7   27.96    1.40
  -1  17   7   25.83    1.39
  -1  17   6  169.00    3.83
  -1  17   6  163.96    3.80
  -1  17   5   28.01    1.51
  -1  17   4    2.13    0.64
  -1  17   4    2.61    0.48
  -1  17   3  126.45    3.00
  -1  17   3  126.82    3.18
  -1  17   2  141.40    3.29
   1 -17  -2  135.46    3.35
  -1  17   2  143.90    3.37
   1 -17  -1   11.06    0.91
  -1  17   1   13.49    0.96
  -1  17   1   13.12    0.98
   1 -17   0   63.65    2.14
   1 -17   0   65.29    2.53
  -1  17   0   71.38    2.20
  -1  17   0   66.32    2.03
  -1  17  -1   76.93    2.28
   1 -17   1   74.26    2.59
   1 -17   1   71.73    2.25
  -1  17  -1   74.58    2.04
   1 -17   2    1.95    0.67
   1 -17   2    2.33    0.53
  -1  17  -2    3.19    0.64
  -1  17  -2    2.61    0.40
   1 -17   3    0.09    0.58
   1 -17   3    0.57    0.41
   1 -17   3    0.08    0.57
  -1  17  -3    0.48    0.47
   1 -17   4   29.94    1.44
   1 -17   4   28.75    1.41
   1 -17   4   28.78    1.21
   1 -17   4   28.33    1.26
  -1  17  -4   30.59    1.28
   1 -17   5   -0.04    0.46
   1 -17   5    0.17    0.24
   1 -17   5   -0.46    0.48
   1 -17   5    0.01    0.30
  -1  17  -5    0.03    0.38
  -1  17  -6    0.21    0.31
   1 -17   6    0.50    0.34
   1 -17   6    0.87    0.26
  -1  16  17   22.19    0.90
  -1  16  17   21.84    0.84
  -1  16  16   25.09    1.06
  -1  16  16   25.17    1.12
  -1  16  15    6.34    0.73
  -1  16  15    5.65    0.51
  -1  16  15    5.19    0.60
  -1  16  14    5.68    0.68
  -1  16  14    8.06    0.67
  -1  16  14    7.40    0.83
  -1  16  13   24.30    1.10
  -1  16  13   25.99    1.23
  -1  16  13   24.31    1.32
  -1  16  13   24.79    1.29
  -1  16  12   17.18    1.14
  -1  16  12   16.69    1.01
  -1  16  12   18.26    1.10
  -1  16  12   16.77    1.17
  -1  16  11    2.58    0.67
  -1  16  11    4.30    0.68
  -1  16  11    1.79    0.72
  -1  16  11    3.34    0.63
  -1  16  10   26.06    1.41
  -1  16  10   25.82    1.38
  -1  16   9  104.69    2.95
  -1  16   9  104.24    2.95
  -1  16   9  103.65    2.91
  -1  16   8   36.71    1.75
   1 -16  -8   35.84    4.32
  -1  16   8   37.07    1.75
  -1  16   7    4.42    0.80
   1 -16  -7    3.34    1.76
  -1  16   7    3.11    0.80
  -1  16   6  106.90    2.88
  -1  16   6  117.06    3.30
   1 -16  -6  101.24    7.17
  -1  16   5  115.48    2.90
  -1  16   5  119.86    3.35
   1 -16  -5  106.84    7.49
  -1  16   5  109.20    3.03
  -1  16   4  157.16    3.89
  -1  16   4  150.63    3.53
  -1  16   3   25.29    1.40
   1 -16  -3   20.08    3.47
   1 -16  -3   24.00    3.57
   1 -16  -3   21.71    1.45
  -1  16   3   23.64    1.43
  -1  16   3   23.92    1.50
   1 -16  -2   13.51    1.19
  -1  16   2   14.29    1.17
   1 -16  -2   10.47    2.76
   1 -16  -2   12.39    2.60
   1 -16  -1   84.19    2.86
  -1  16   1   90.81    2.87
   1 -16  -1   84.95    6.19
   1 -16  -1   78.77    6.48
  -1  16   0    2.85    0.79
   1 -16   0    3.31    1.29
  -1  16   0    1.67    0.59
   1 -16   0    1.90    0.67
   1 -16   1   57.03    2.30
  -1  16  -1   60.50    2.31
  -1  16  -1   58.15    2.03
  -1  16  -2   72.78    2.17
   1 -16   2   70.02    2.80
  -1  16  -2   71.96    2.50
   1 -16   2   66.45    2.46
   1 -16   3   22.48    1.60
  -1  16  -3   27.73    1.49
   1 -16   3   23.40    1.42
  -1  16  -3   27.17    1.15
   1 -16   4   38.70    1.95
  -1  16  -4   39.06    1.39
  -1  16  -4   39.34    1.70
   1 -16   4   36.25    1.69
   1 -16   5   11.99    0.98
   1 -16   5   13.21    1.15
  -1  16  -5   12.17    0.98
  -1  16  -5   12.57    0.79
   1 -16   5   10.75    1.09
   1 -16   5   10.92    0.93
   1 -16   6   22.68    1.32
   1 -16   6   22.22    1.33
   1 -16   6   19.36    1.06
  -1  16  -6   22.94    1.16
   1 -16   6   22.40    1.21
  -1  16  -6   21.90    0.99
   1 -16   7   13.92    0.90
  -1  16  -7   13.59    0.84
  -1  16  -7   14.44    0.77
   1 -16   7   14.83    1.00
   1 -16   8   38.73    1.31
  -1  16  -8   38.90    1.21
  -1  16  -8   39.21    1.17
   1 -16   8   37.81    1.34
  -1  15  18   38.29    1.15
  -1  15  18   38.12    1.27
  -1  15  17   27.34    1.24
  -1  15  17   29.13    1.18
  -1  15  16    3.45    0.46
  -1  15  16    2.80    0.54
  -1  15  16    1.84    0.62
  -1  15  15   66.58    2.15
  -1  15  15   64.62    1.95
  -1  15  15   68.19    2.28
  -1  15  14   32.85    1.60
  -1  15  14   31.78    1.43
  -1  15  13    1.09    0.71
  -1  15  13    1.32    0.51
  -1  15  13    1.79    0.44
  -1  15  12   38.65    1.89
  -1  15  12   37.19    1.68
  -1  15  12   36.33    1.60
  -1  15  11  108.10    3.27
   1 -15 -11  117.43    7.47
  -1  15  11  108.82    3.07
  -1  15  11  108.05    2.99
  -1  15  10   16.40    1.21
   1 -15 -10   17.65    3.16
  -1  15  10   17.09    1.33
  -1  15  10   15.79    1.22
   1 -15  -9    0.92    1.55
  -1  15   9    1.01    0.62
  -1  15   9    1.11    0.64
  -1  15   9    1.20    0.66
   1 -15  -8   98.89    6.80
  -1  15   8  116.06    3.38
  -1  15   8  109.82    3.29
  -1  15   8  115.28    3.34
   1 -15  -8  110.11    7.62
  -1  15   7  317.08    5.82
   1 -15  -7  289.04   12.03
   1 -15  -7  285.40   12.94
  -1  15   7  313.91    6.18
  -1  15   7  325.28    6.37
   1 -15  -6  122.49    8.37
  -1  15   6  139.68    3.80
   1 -15  -6  116.91    7.61
  -1  15   6  131.94    3.42
  -1  15   5    4.75    0.66
  -1  15   5    5.15    0.77
  -1  15   5    4.07    0.64
   1 -15  -5    6.38    2.31
   1 -15  -5    8.35    2.81
  -1  15   4  336.40    6.27
  -1  15   4  330.67    6.47
   1 -15  -4  318.44   13.86
  -1  15   3   86.52    2.88
  -1  15   3   85.26    2.68
   1 -15  -3   85.84    7.19
  -1  15   2   63.11    2.26
  -1  15   2   63.89    2.48
   1 -15  -2   61.55    6.17
   1 -15  -1    5.61    2.22
   1 -15  -1    5.57    1.02
  -1  15   1    4.32    0.83
   1 -15  -1    5.18    2.18
  -1  15   0  238.34    5.29
   1 -15   0  228.37   11.53
   1 -15   0  210.98   10.34
   1 -15   0  225.63    5.47
  -1  15  -1   29.31    1.74
   1 -15   1   25.33    3.52
   1 -15   1   27.70    1.81
  -1  15  -2    5.27    0.64
   1 -15   2    7.50    1.94
  -1  15  -2    4.72    0.90
   1 -15   2    4.34    0.91
  -1  15  -3   45.85    2.08
   1 -15   3   48.10    2.51
  -1  15  -3   44.85    1.71
   1 -15   3   41.82    2.15
   1 -15   4    5.99    0.97
  -1  15  -4    6.00    0.92
   1 -15   4    7.16    1.20
  -1  15  -4    7.53    0.76
  -1  15  -5   63.29    2.05
   1 -15   5   61.71    2.62
   1 -15   5   57.93    2.35
  -1  15  -6  151.26    3.26
  -1  15  -6  160.28    3.74
  -1  15  -6  158.05    3.47
   1 -15   6  148.94    3.80
   1 -15   6  154.75    4.15
   1 -15   6  157.27    4.10
   1 -15   6  155.20    3.91
   1 -15   7   58.10    2.15
  -1  15  -7   58.33    1.89
  -1  15  -7   58.85    2.00
   1 -15   7   59.96    2.25
  -1  15  -7   58.39    1.75
   1 -15   7   59.74    2.32
   1 -15   7   55.76    1.98
  -1  15  -8    2.12    0.49
   1 -15   8    1.83    0.59
  -1  15  -8    2.93    0.52
   1 -15   8    2.29    0.57
  -1  15  -8    2.34    0.40
  -1  15  -9   17.19    0.92
   1 -15   9   14.27    0.93
  -1  15  -9   15.88    0.84
  -1  15  -9   14.47    0.73
   1 -15   9   15.87    0.99
   1 -15  10   26.76    1.12
   1 -15  10   24.73    1.00
  -1  14  19   20.59    0.79
  -1  14  19   20.06    0.92
  -1  14  18   44.05    1.60
  -1  14  18   43.41    1.45
  -1  14  17   47.98    1.83
  -1  14  17   44.19    1.59
  -1  14  17   42.46    1.47
  -1  14  17   43.08    1.63
  -1  14  17   43.98    1.59
  -1  14  16    2.21    0.62
  -1  14  16    3.65    0.82
  -1  14  16    3.33    0.56
  -1  14  16    3.72    0.70
  -1  14  15   34.01    1.54
  -1  14  15   36.57    1.84
  -1  14  15   37.52    1.72
  -1  14  15   35.81    1.70
  -1  14  15   34.87    1.65
  -1  14  14   68.06    2.44
  -1  14  14   66.43    2.28
  -1  14  14   71.94    2.49
  -1  14  14   66.94    2.04
  -1  14  14   68.76    2.62
  -1  14  14   68.36    2.48
  -1  14  13   31.88    1.77
  -1  14  13   28.23    1.51
  -1  14  13   28.40    1.67
  -1  14  13   27.00    1.36
  -1  14  13   28.59    1.76
  -1  14  12   11.16    0.93
  -1  14  12   11.09    0.97
  -1  14  12   14.25    1.30
  -1  14  12   11.56    1.05
  -1  14  12   14.82    1.47
  -1  14  12    9.65    0.97
  -1  14  12   11.26    1.24
  -1  14  11    5.09    0.83
  -1  14  11    5.66    1.00
  -1  14  11    4.97    0.69
  -1  14  11    4.98    0.80
  -1  14  11    3.56    0.68
  -1  14  10  246.63    5.20
   1 -14 -10  239.05   10.69
  -1  14  10  254.64    5.56
  -1  14  10  246.99    5.29
  -1  14  10  239.71    5.55
  -1  14  10  242.08    5.59
  -1  14  10  242.02    5.02
  -1  14  10  252.42    5.40
  -1  14   9    8.01    1.09
  -1  14   9    7.56    0.85
  -1  14   9    9.33    1.05
  -1  14   9    8.96    1.01
  -1  14   9    7.54    0.85
   1 -14  -9    9.97    2.43
  -1  14   8    0.60    0.52
  -1  14   8    1.04    0.62
  -1  14   8    0.25    0.65
   1 -14  -8    2.01    1.82
   1 -14  -8   -0.52    2.00
   1 -14  -7   92.38    7.21
   1 -14  -7   96.55    7.57
  -1  14   7  103.51    3.26
   1 -14  -7   92.38    6.77
  -1  14   7  104.44    3.06
  -1  14   6   47.72    1.97
   1 -14  -6   50.83    5.11
   1 -14  -6   46.36    5.30
   1 -14  -6   41.96    5.09
  -1  14   6   47.98    2.03
   1 -14  -5  192.96   10.55
  -1  14   5  191.27    4.47
  -1  14   5  195.74    4.55
   1 -14  -5  182.94    9.79
   1 -14  -5  189.97   10.68
   1 -14  -4   39.19    4.98
  -1  14   4   41.25    1.97
   1 -14  -4   37.31    4.79
  -1  14   4   42.16    1.92
   1 -14  -4   40.00    4.75
  -1  14   3   28.69    1.68
   1 -14  -3   27.09    3.99
   1 -14  -3   30.27    4.69
  -1  14   3   30.13    1.62
  -1  14   2  156.93    4.20
   1 -14  -2  165.44   10.07
  -1  14   2  161.84    4.04
  -1  14   1   55.67    2.37
   1 -14  -1   51.47    5.95
  -1  14   1   51.92    2.15
   1 -14   0   19.53    3.87
  -1  14   0   20.22    1.34
  -1  14   0   21.60    1.56
   1 -14   1  106.22    3.67
   1 -14   1  106.39    8.09
  -1  14  -1  114.64    3.53
   1 -14   1  107.56    7.39
  -1  14  -2   30.36    1.81
  -1  14  -2   30.32    1.48
   1 -14   2   27.30    3.70
   1 -14   2   28.72    1.94
  -1  14  -3    1.43    0.50
   1 -14   3    3.11    1.43
   1 -14   3    0.95    0.78
  -1  14  -3    0.72    0.73
  -1  14  -3    2.27    0.55
  -1  14  -4    0.91    0.47
   1 -14   4    0.66    0.82
   1 -14   4    1.47    1.10
  -1  14  -4    0.15    0.75
  -1  14  -4    0.47    0.41
  -1  14  -5   58.47    2.15
   1 -14   5   54.38    2.52
  -1  14  -5   58.59    2.35
  -1  14  -5   57.61    2.09
   1 -14   5   57.67    2.79
  -1  14  -6   25.14    1.35
   1 -14   6   23.94    1.66
  -1  14  -6   24.87    1.41
   1 -14   6   25.43    1.88
   1 -14   7   11.78    1.37
  -1  14  -7   12.10    0.96
   1 -14   7   12.01    1.30
   1 -14   7   11.22    1.19
  -1  14  -7   12.06    1.01
   1 -14   7   10.51    1.03
  -1  14  -8  132.77    3.28
  -1  14  -8  127.88    3.13
   1 -14   8  124.10    3.26
  -1  14  -8  134.99    3.28
   1 -14   8  130.67    3.61
   1 -14   8  131.24    3.79
   1 -14   8  127.96    3.61
  -1  14  -9   60.00    1.94
   1 -14   9   57.89    2.16
  -1  14  -9   56.34    1.88
   1 -14   9   60.30    2.22
  -1  14  -9   63.91    2.06
  -1  14 -10   23.39    1.17
  -1  14 -10   21.29    1.06
   1 -14  10   21.00    1.24
  -1  14 -10   21.20    0.99
   1 -14  10   19.27    1.13
   1 -14  11   84.10    2.28
  -1  14 -11   81.79    1.99
  -1  14 -11   85.82    2.14
   1 -14  12   72.90    1.88
  -1  14 -12   73.20    1.78
  -1  13  20   25.62    0.94
  -1  13  20   26.26    0.91
  -1  13  19  120.38    2.55
  -1  13  19  122.52    2.52
  -1  13  19  123.09    2.77
  -1  13  19  119.07    2.58
  -1  13  18  135.93    2.92
  -1  13  18  141.15    3.12
  -1  13  18  144.98    3.12
  -1  13  18  141.06    3.14
  -1  13  17   11.73    0.90
  -1  13  17   11.12    0.95
  -1  13  17   12.07    0.88
  -1  13  17   13.14    1.16
  -1  13  17   11.00    0.95
  -1  13  17   10.92    0.94
  -1  13  17   12.38    0.95
  -1  13  16  133.59    3.37
  -1  13  16  123.88    3.19
  -1  13  16  124.93    3.24
  -1  13  16  136.03    3.67
  -1  13  16  129.99    2.96
  -1  13  16  130.04    3.27
  -1  13  16  123.55    3.02
  -1  13  16  132.65    3.43
  -1  13  15   64.88    2.28
  -1  13  15   65.62    2.37
  -1  13  15   67.48    2.12
  -1  13  15   68.53    2.50
  -1  13  15   69.31    2.49
  -1  13  15   64.43    2.38
  -1  13  15   70.33    2.73
  -1  13  15   64.49    2.14
  -1  13  15   68.05    2.39
  -1  13  14   37.54    1.87
  -1  13  14   36.64    1.61
  -1  13  14   35.76    1.84
  -1  13  14   36.86    1.77
  -1  13  14   37.11    2.04
  -1  13  14   37.11    1.56
  -1  13  14   36.39    1.63
  -1  13  14   37.64    1.83
  -1  13  14   36.65    1.83
  -1  13  13   35.04    1.87
  -1  13  13   34.07    1.82
  -1  13  13   36.64    1.65
  -1  13  13   36.62    1.66
  -1  13  13   36.10    1.84
  -1  13  13   35.89    2.02
  -1  13  13   34.64    1.61
  -1  13  13   36.29    1.89
  -1  13  13   32.71    1.73
  -1  13  12  174.17    4.30
  -1  13  12  166.48    4.29
  -1  13  12  178.52    4.70
  -1  13  12  170.57    4.01
  -1  13  12  174.58    4.37
  -1  13  12  173.56    4.28
  -1  13  12  167.45    4.04
  -1  13  12  164.88    3.89
  -1  13  12  169.08    4.41
  -1  13  11    2.05    0.85
  -1  13  11    3.42    0.87
  -1  13  11    0.88    0.57
   1 -13 -11    5.57    2.00
   1 -13 -11    1.67    1.13
  -1  13  11    3.22    0.67
  -1  13  11    0.41    0.85
  -1  13  11    1.17    0.53
  -1  13  11    1.91    0.67
  -1  13  11    3.87    0.99
  -1  13  11    2.67    0.62
  -1  13  10   18.54    1.21
  -1  13  10   22.37    1.54
  -1  13  10   18.12    1.33
  -1  13  10   19.48    1.41
  -1  13  10   15.72    1.24
  -1  13  10   18.04    1.49
   1 -13 -10   17.54    3.21
  -1  13  10   17.44    1.24
   1 -13 -10   17.63    2.96
  -1  13  10   22.05    1.60
  -1  13  10   17.38    1.47
  -1  13   9  122.17    3.64
  -1  13   9  131.72    3.85
   1 -13  -9  122.93    8.07
  -1  13   9  123.85    3.44
  -1  13   9  128.27    3.57
  -1  13   9  129.25    3.89
  -1  13   9  134.87    3.77
  -1  13   9  125.64    3.83
  -1  13   9  133.11    3.69
   1 -13  -9  115.77    7.48
  -1  13   8  206.11    4.67
  -1  13   8  197.55    4.86
  -1  13   8  214.17    4.75
   1 -13  -8  208.37   10.09
  -1  13   8  203.25    5.15
   1 -13  -8  206.85   10.54
  -1  13   8  205.28    5.08
  -1  13   8  211.38    4.95
  -1  13   8  213.95    5.15
   1 -13  -7   17.29    3.32
  -1  13   7   19.18    1.63
  -1  13   7   16.61    1.24
  -1  13   7   17.00    1.40
   1 -13  -7   16.34    3.06
  -1  13   6   -0.85    1.41
  -1  13   6    1.35    0.57
   1 -13  -6    1.25    1.83
  -1  13   6    0.32    0.39
   1 -13  -6    0.51    1.55
   1 -13  -6   -0.07    1.71
  -1  13   6    0.02    0.45
  -1  13   6    0.36    0.55
   1 -13  -5   22.88    3.79
  -1  13   5   23.99    1.46
  -1  13   5   21.64    1.42
  -1  13   5   23.61    3.07
   1 -13  -5   23.16    3.46
  -1  13   5   23.62    1.42
   1 -13  -5   19.35    3.54
   1 -13  -4  531.40   17.43
  -1  13   4  495.21    8.67
  -1  13   4  477.82    8.49
   1 -13  -4  476.03   16.97
   1 -13  -4  493.99   14.97
  -1  13   4  476.89    8.45
   1 -13  -4  469.68   16.22
  -1  13   4  541.34   15.62
   1 -13  -4  500.71   17.45
  -1  13   3   56.98    2.26
  -1  13   3   71.29    5.40
  -1  13   3   56.63    2.38
   1 -13  -3   61.96    6.06
  -1  13   3   57.05    2.34
   1 -13  -3   59.20    5.57
   1 -13  -3   56.53    5.98
   1 -13  -3   59.05    5.66
   1 -13  -3   54.78    4.78
  -1  13   2    0.79    0.51
   1 -13  -2   -0.90    2.78
  -1  13   2    4.07    1.66
   1 -13  -2    4.41    2.49
   1 -13  -2   -2.83    1.29
   1 -13  -2    1.13    1.35
  -1  13   2    0.91    0.57
  -1  13   2    0.84    0.58
  -1  13   1   77.02    5.66
  -1  13   1   68.78    2.66
   1 -13  -1   71.18    6.01
  -1  13   1   68.98    2.53
   1 -13  -1   69.97    5.57
   1 -13  -1   68.11    6.43
   1 -13   0   29.26    3.88
  -1  13   0   34.96    1.80
  -1  13   0   36.36    1.93
   1 -13   0   35.18    5.01
  -1  13  -1   53.56    1.97
   1 -13   1   48.95    5.83
  -1  13  -1   49.54    2.13
  -1  13  -1   52.90    2.33
  -1  13  -2  221.96    4.70
   1 -13   2  210.66   11.37
  -1  13  -2  229.99    4.84
  -1  13  -2  224.97    5.25
   1 -13   2  203.26   10.20
   1 -13   2  204.45    5.48
  -1  13  -3  107.39    3.07
  -1  13  -3  112.48    3.18
  -1  13  -3  110.94    3.50
   1 -13   3  106.29    7.20
   1 -13   3  106.42    3.75
  -1  13  -4    4.33    0.85
   1 -13   4    5.46    1.13
  -1  13  -4    4.55    0.74
   1 -13   4    6.10    1.87
  -1  13  -5    2.81    0.75
  -1  13  -5    2.97    0.63
   1 -13   5    3.74    1.05
   1 -13   6   39.40    2.36
  -1  13  -6   40.79    1.87
  -1  13  -6   40.01    1.97
   1 -13   6   39.04    2.22
   1 -13   7   95.62    3.52
   1 -13   7   95.18    3.35
  -1  13  -7   94.84    2.93
   1 -13   8   21.38    1.66
  -1  13  -8   20.48    1.35
   1 -13   8   20.57    1.41
   1 -13   8   20.81    1.74
   1 -13   8   20.45    1.60
  -1  13  -9   62.29    2.17
   1 -13   9   62.12    2.66
  -1  13  -9   64.44    2.29
   1 -13   9   60.92    2.47
   1 -13   9   61.60    2.51
   1 -13   9   57.87    2.17
   1 -13  10   33.16    1.79
   1 -13  10   30.87    1.65
  -1  13 -10   37.60    1.69
  -1  13 -10   33.85    1.44
   1 -13  11   28.68    1.53
   1 -13  11   28.29    1.11
   1 -13  11   27.62    1.39
  -1  13 -11   29.44    1.39
  -1  13 -11   27.82    1.13
   1 -13  12    3.08    0.37
   1 -13  12    3.51    0.64
  -1  13 -12    3.38    0.54
   1 -13  12    2.02    0.42
  -1  13 -12    4.12    0.62
  -1  13 -13   22.93    0.99
   1 -13  13   22.87    1.10
  -1  13 -13   24.88    1.05
   1 -13  14   14.92    0.73
  -1  13 -14   16.58    0.70
  -1  12  20  135.89    2.67
  -1  12  20  135.04    2.68
  -1  12  20  133.34    2.74
  -1  12  20  135.20    2.73
  -1  12  19   22.66    1.09
  -1  12  19   24.08    1.12
  -1  12  19   21.81    1.08
  -1  12  19   21.29    1.19
  -1  12  19   20.89    1.07
  -1  12  19   22.39    1.11
  -1  12  18  164.39    3.24
  -1  12  18  155.57    3.39
  -1  12  18  155.83    3.54
  -1  12  18  158.88    3.53
  -1  12  18  159.40    3.56
  -1  12  18  164.74    3.81
  -1  12  18  156.41    3.46
  -1  12  17  246.68    5.00
  -1  12  17  245.56    4.92
  -1  12  17  247.82    4.90
  -1  12  17  256.97    5.36
  -1  12  17  249.42    4.98
  -1  12  17  239.73    4.75
  -1  12  17  252.73    5.09
  -1  12  16  115.30    3.25
  -1  12  16  114.45    3.19
  -1  12  16  112.57    3.28
  -1  12  16  110.36    3.12
  -1  12  16  116.92    3.52
  -1  12  16  119.52    3.44
  -1  12  16  109.33    3.11
  -1  12  16  113.39    3.03
  -1  12  15    7.34    0.89
  -1  12  15    7.89    0.92
  -1  12  15    8.79    0.96
  -1  12  15    6.40    0.96
  -1  12  15    8.28    1.17
  -1  12  15    7.59    0.96
  -1  12  15    7.36    0.96
  -1  12  15    7.99    1.08
  -1  12  14  175.29    4.68
  -1  12  14  173.16    4.28
  -1  12  14  170.32    4.22
  -1  12  14  167.63    4.31
  -1  12  14  162.59    3.95
  -1  12  14  169.04    4.22
  -1  12  14  175.62    4.47
  -1  12  14  166.36    3.79
  -1  12  13   59.54    2.39
  -1  12  13   61.17    2.52
  -1  12  13   60.25    2.24
  -1  12  13   61.24    2.21
  -1  12  13   58.57    2.65
  -1  12  13   60.56    2.40
  -1  12  13   57.64    2.45
  -1  12  13   60.89    2.42
  -1  12  12    8.17    0.97
  -1  12  12    8.50    1.17
  -1  12  12    9.21    0.94
  -1  12  12    8.35    0.98
  -1  12  12    9.07    1.02
  -1  12  12    8.05    1.02
  -1  12  12    7.21    0.98
  -1  12  12    8.31    0.89
   1 -12 -11   -0.70    1.91
  -1  12  11    2.25    0.61
  -1  12  11    1.41    0.59
  -1  12  11    0.34    0.72
  -1  12  11    1.78    0.60
  -1  12  11    1.10    0.83
  -1  12  11    2.17    0.59
  -1  12  11    0.63    0.75
  -1  12  11    2.27    0.68
  -1  12  10   39.74    1.77
  -1  12  10   38.64    2.10
  -1  12  10   38.02    1.85
   1 -12 -10   35.26    4.26
   1 -12 -10   40.31    4.30
  -1  12  10   39.12    1.84
  -1  12  10   39.88    2.05
  -1  12  10   37.09    2.00
   1 -12 -10   36.98    4.00
  -1  12  10   39.70    1.96
  -1  12  10   36.65    1.91
  -1  12  10   35.27    1.86
   1 -12  -9   23.07    3.07
  -1  12   9   23.64    1.37
  -1  12   9   23.58    1.65
  -1  12   9   25.43    1.66
  -1  12   9   25.18    1.58
  -1  12   9   26.41    3.34
  -1  12   9   22.26    1.46
  -1  12   9   24.06    1.54
   1 -12  -9   21.65    3.24
   1 -12  -9   23.25    3.56
  -1  12   9   24.62    1.63
  -1  12   9   24.58    1.52
  -1  12   9   24.64    1.45
   1 -12  -9   25.10    3.65
  -1  12   8  170.75    4.16
  -1  12   8  165.06    4.17
   1 -12  -8  183.40    9.72
   1 -12  -8  168.71    8.87
  -1  12   8  182.31    8.59
  -1  12   8  172.94    4.49
  -1  12   8  176.43    4.58
  -1  12   8  169.38    4.51
  -1  12   8  165.30    4.29
   1 -12  -8  158.67    9.00
   1 -12  -8  175.29    8.59
  -1  12   7   84.68    2.76
   1 -12  -7   82.88    6.56
  -1  12   7   84.86    3.07
  -1  12   7   94.83    6.07
  -1  12   7   92.48    3.13
   1 -12  -7   84.74    6.31
  -1  12   7   86.19    2.79
  -1  12   7   89.18    3.07
  -1  12   7   87.77    2.95
   1 -12  -7   96.54    6.97
  -1  12   6    9.63    1.07
   1 -12  -6    6.22    2.22
   1 -12  -6    5.58    2.13
  -1  12   6   16.28    1.46
  -1  12   6    8.22    0.87
  -1  12   6    9.58    0.86
  -1  12   6    8.31    1.80
  -1  12   6   13.09    1.17
  -1  12   6   11.87    1.30
  -1  12   6    9.54    0.95
   1 -12  -6    8.34    2.72
  -1  12   5    8.27    1.95
  -1  12   5    9.54    0.99
  -1  12   5   12.03    1.02
   1 -12  -5   10.33    2.80
   1 -12  -5   10.05    2.61
  -1  12   5    9.82    0.92
  -1  12   5    9.38    0.93
   1 -12  -5   10.50    2.54
   1 -12  -5   10.24    1.98
  -1  12   4   49.57    4.39
  -1  12   4   44.88    1.95
   1 -12  -4   45.03    4.68
   1 -12  -4   51.54    4.30
  -1  12   4   46.21    2.03
   1 -12  -4   42.32    4.86
   1 -12  -4   44.29    4.70
  -1  12   4   48.17    2.01
  -1  12   3  192.25    4.49
  -1  12   3  189.09    4.56
  -1  12   3  211.81    9.09
   1 -12  -3  196.34    8.85
   1 -12  -3  200.82   10.47
   1 -12  -3  207.39   10.16
   1 -12  -3  190.58   10.06
  -1  12   3  188.03    4.44
   1 -12  -3  195.07    9.78
   1 -12  -2  221.99   10.55
   1 -12  -2  213.03    9.44
  -1  12   2  219.00    4.91
   1 -12  -2  231.80   11.32
  -1  12   2  249.60    9.91
   1 -12  -2  218.03   10.49
  -1  12   2  212.11    4.98
  -1  12   2  204.54    4.73
   1 -12  -2  223.77   11.04
   1 -12  -1   31.10    3.90
   1 -12  -1   32.92    3.76
   1 -12  -1   25.26    3.89
   1 -12  -1   27.31    4.37
  -1  12   1   30.00    1.71
  -1  12   1   31.59    1.71
  -1  12   1   31.14    3.62
  -1  12   1   29.45    1.60
   1 -12   0  193.98    9.73
  -1  12   0  223.95    9.52
  -1  12   0  200.96    4.76
  -1  12   0  189.05    4.54
   1 -12   0  200.39    9.38
  -1  12   0  195.58    4.81
   1 -12   0  199.30   10.67
  -1  12  -1   49.04    2.17
   1 -12   1   53.42    5.01
   1 -12   1   53.04    4.86
   1 -12   1   45.83    5.54
  -1  12  -1   55.29    4.67
  -1  12  -1   46.33    2.04
  -1  12  -2   41.39    4.18
   1 -12   2   48.15    4.63
   1 -12   2   42.74    4.42
  -1  12  -2   43.88    2.11
  -1  12  -2   41.81    1.97
   1 -12   2   44.79    5.56
  -1  12  -3   30.36    1.77
  -1  12  -3   29.23    1.53
   1 -12   3   30.17    3.66
   1 -12   3   32.26    2.06
   1 -12   3   26.96    3.70
   1 -12   3   29.43    4.56
  -1  12  -3   35.33    3.85
   1 -12   3   31.67    3.88
  -1  12  -4   67.39    2.40
   1 -12   4   71.67    3.04
   1 -12   4   64.47    5.39
  -1  12  -4   66.22    2.64
  -1  12  -4   69.63    2.53
   1 -12   5   41.23    2.37
   1 -12   5   43.81    2.18
  -1  12  -5   41.83    1.96
  -1  12  -5   39.49    1.87
   1 -12   5   39.63    4.12
  -1  12  -5   37.77    1.98
   1 -12   5   43.46    2.56
  -1  12  -6    3.68    0.78
   1 -12   6    4.85    0.83
  -1  12  -6    3.73    0.72
   1 -12   6    3.83    1.11
  -1  12  -6    3.42    0.76
   1 -12   6    3.91    1.08
   1 -12   7    0.72    0.86
  -1  12  -7    0.74    0.62
  -1  12  -7    1.47    0.62
  -1  12  -7    1.04    0.61
   1 -12   7    1.43    1.02
  -1  12  -8  128.78    3.61
   1 -12   8  124.63    3.79
   1 -12   8  135.87    3.32
  -1  12  -8  124.19    3.58
   1 -12   8  127.96    4.16
   1 -12   8  125.53    4.00
   1 -12   8  131.03    4.09
   1 -12   9   32.83    1.95
  -1  12  -9   33.78    1.82
   1 -12   9   34.59    1.71
  -1  12  -9   34.26    1.79
   1 -12   9   35.82    2.11
   1 -12   9   33.47    2.11
   1 -12   9   36.36    1.60
   1 -12   9   33.31    1.77
   1 -12  10   86.24    2.99
   1 -12  10   84.90    2.64
   1 -12  10   91.94    3.20
   1 -12  10   91.94    2.59
  -1  12 -10   89.09    2.85
  -1  12 -10   88.83    2.64
  -1  12 -10   91.67    2.91
   1 -12  10   90.39    3.25
  -1  12 -11  221.14    4.75
  -1  12 -11  221.47    4.32
   1 -12  11  225.79    4.42
  -1  12 -11  231.97    4.81
   1 -12  11  214.84    4.82
   1 -12  11  231.81    5.15
   1 -12  11  223.73    4.52
  -1  12 -12    8.60    0.90
   1 -12  12    8.87    0.76
   1 -12  12    8.64    1.01
   1 -12  12    8.64    0.84
   1 -12  12    7.96    0.71
  -1  12 -12    8.94    0.93
   1 -12  13    6.44    0.61
   1 -12  13    5.51    0.76
  -1  12 -13    4.96    0.66
  -1  12 -13    7.07    0.75
   1 -12  14   77.71    1.87
  -1  12 -14   86.26    2.13
   1 -12  14   82.95    2.24
   1 -12  14   77.96    1.84
  -1  12 -15   68.53    1.66
  -1  12 -15   67.97    1.60
   1 -12  15   65.49    1.71
  -1  11  21    1.75    0.34
  -1  11  21    2.62    0.42
  -1  11  21    2.34    0.35
  -1  11  20   75.80    2.03
  -1  11  20   78.57    2.08
  -1  11  20   73.68    1.94
  -1  11  20   80.92    2.08
  -1  11  20   76.13    2.05
  -1  11  19  140.13    3.24
  -1  11  19  138.98    3.36
  -1  11  19  140.61    3.26
  -1  11  19  139.00    3.14
  -1  11  19  145.50    3.21
  -1  11  19  143.79    3.13
  -1  11  18   14.32    1.09
  -1  11  18   15.92    1.26
  -1  11  18   15.67    1.08
  -1  11  18   13.08    1.00
  -1  11  18   15.18    1.11
  -1  11  18   14.76    1.06
  -1  11  17    1.47    0.64
  -1  11  17    1.47    0.62
  -1  11  17    1.15    0.61
  -1  11  17    2.56    0.86
  -1  11  17    0.52    0.79
  -1  11  17    0.70    0.85
  -1  11  17    2.19    0.66
  -1  11  17    1.95    0.78
  -1  11  16   88.55    2.86
  -1  11  16   89.65    3.12
  -1  11  16   90.67    2.95
  -1  11  16   93.68    3.10
  -1  11  16   89.84    2.77
  -1  11  16   86.19    2.82
  -1  11  16   87.58    2.81
  -1  11  16   90.42    2.99
  -1  11  15    7.33    0.90
  -1  11  15    8.38    1.10
  -1  11  15    6.26    0.87
  -1  11  15    7.70    0.93
  -1  11  15    8.46    0.93
  -1  11  15    7.56    0.95
  -1  11  15    7.47    1.11
  -1  11  14   69.51    2.57
  -1  11  14   70.23    2.87
  -1  11  14   71.04    2.69
  -1  11  14   71.66    2.78
  -1  11  14   69.97    2.61
  -1  11  14   68.42    2.61
  -1  11  14   67.37    2.45
  -1  11  13    0.50    0.61
  -1  11  13    1.10    0.74
  -1  11  13    1.56    0.84
  -1  11  13    1.67    0.65
  -1  11  13    2.30    0.71
  -1  11  13    2.14    0.75
  -1  11  13    1.69    0.48
  -1  11  13    1.94    0.57
  -1  11  12   23.61    1.41
  -1  11  12   24.30    1.52
  -1  11  12   25.03    1.65
   1 -11 -12   27.19    3.40
  -1  11  12   24.91    1.45
  -1  11  12   24.11    1.56
  -1  11  12   24.92    1.62
  -1  11  12   23.08    1.48
  -1  11  12   24.16    1.73
  -1  11  11   58.99    2.27
  -1  11  11   59.08    2.63
  -1  11  11   61.24    2.46
  -1  11  11   58.52    2.23
  -1  11  11   60.85    2.41
  -1  11  11   63.43    5.02
  -1  11  11   59.92    2.47
   1 -11 -11   54.59    5.06
  -1  11  11   58.82    2.47
  -1  11  11   62.01    2.45
   1 -11 -11   61.58    5.06
  -1  11  10  115.93    3.44
  -1  11  10  113.19    3.45
  -1  11  10  115.00    3.54
  -1  11  10  115.79    3.70
   1 -11 -10  115.31    6.83
   1 -11 -10  119.43    7.53
  -1  11  10  112.66    3.18
  -1  11  10  119.84    3.48
  -1  11  10  118.84    3.33
  -1  11  10  118.40    3.53
  -1  11  10  117.95    6.85
  -1  11   9   83.71    2.74
  -1  11   9   84.21    2.88
  -1  11   9   81.76    2.98
  -1  11   9   86.86    5.73
  -1  11   9   78.30    2.56
  -1  11   9   82.83    2.84
   1 -11  -9   79.05    5.63
  -1  11   9   80.50    2.87
  -1  11   9   80.00    2.77
  -1  11   9   80.01    2.78
   1 -11  -8  126.66    7.70
  -1  11   8  131.65    3.63
  -1  11   8  139.47    3.96
  -1  11   8  151.28    7.55
  -1  11   8  142.81    3.90
  -1  11   8  143.56    3.70
   1 -11  -8  130.85    7.19
  -1  11   8  143.99    3.95
  -1  11   8  139.25    3.75
   1 -11  -7   19.55    2.87
  -1  11   7   23.83    1.45
  -1  11   7   26.58    1.60
  -1  11   7   21.86    1.36
   1 -11  -7   19.98    2.97
   1 -11  -7   21.38    3.36
  -1  11   7   23.78    1.54
  -1  11   7   23.43    1.50
  -1  11   7   25.06    3.11
   1 -11  -6  394.58   13.70
  -1  11   6  418.14   12.78
   1 -11  -6  384.74   12.61
   1 -11  -6  398.11   13.46
  -1  11   6  375.32    7.13
  -1  11   6  387.87    7.38
  -1  11   6  397.24    7.38
  -1  11   5  155.85    4.10
   1 -11  -5  147.07    8.26
  -1  11   5  160.44    7.59
   1 -11  -5  161.42    7.20
  -1  11   5  157.24    4.08
   1 -11  -5  147.55    7.92
   1 -11  -5  168.71    8.75
   1 -11  -4  100.04    5.73
   1 -11  -4   95.49    6.71
   1 -11  -4   86.88    6.15
  -1  11   4  104.40    6.06
   1 -11  -4  106.58    6.88
   1 -11  -3    5.55    1.85
   1 -11  -3    1.28    1.50
   1 -11  -3    3.22    1.32
  -1  11   3    2.59    1.27
   1 -11  -3    2.24    2.00
   1 -11  -2   52.13    4.95
   1 -11  -2   53.83    4.88
   1 -11  -2   47.88    5.07
   1 -11  -2   56.28    5.26
   1 -11  -2   49.59    4.27
  -1  11   2   50.06    4.25
   1 -11  -1  248.41   11.16
   1 -11  -1  239.61   10.53
  -1  11   1  254.09    9.80
   1 -11  -1  250.69   11.37
   1 -11  -1  233.32   10.34
   1 -11  -1  258.22   10.08
   1 -11   0  184.14    9.06
   1 -11   0  186.67    9.96
  -1  11   0  195.80    4.58
   1 -11   0  185.23    9.43
   1 -11   0  189.17    8.74
  -1  11   0  208.27    8.75
  -1  11   0  189.42    4.45
   1 -11   1    7.15    1.65
  -1  11  -1    9.23    2.00
   1 -11   1    7.41    2.96
   1 -11   1   10.99    2.07
  -1  11  -1   10.71    0.98
  -1  11  -1   11.33    1.05
  -1  11  -2  163.91    3.97
   1 -11   2  166.81    9.51
   1 -11   2  154.21    8.21
  -1  11  -2  171.84    8.17
  -1  11  -2  166.61    4.21
  -1  11  -2  171.20    4.04
  -1  11  -2  179.78    4.33
   1 -11   2  168.57    8.55
  -1  11  -2  159.46    4.06
  -1  11  -3  242.89    9.92
   1 -11   3  216.30    9.75
  -1  11  -3  240.01    5.32
   1 -11   3  217.89    9.94
  -1  11  -3  224.71    5.16
   1 -11   3  226.13   10.12
  -1  11  -3  235.37    5.02
  -1  11  -3  233.85    5.05
   1 -11   3  226.01   11.17
   1 -11   4   13.20    2.65
  -1  11  -4    9.82    2.39
  -1  11  -4    8.89    1.04
   1 -11   4    9.72    1.23
  -1  11  -4   10.18    1.01
   1 -11   4    6.96    1.70
   1 -11   4   10.52    2.30
  -1  11  -4    9.29    0.96
  -1  11  -4   10.75    1.07
   1 -11   4    9.21    1.12
  -1  11  -5   50.00    4.60
  -1  11  -5   54.88    2.26
   1 -11   5   50.19    4.79
  -1  11  -5   51.89    2.30
   1 -11   5   50.99    4.58
   1 -11   5   54.56    2.41
   1 -11   5   49.70    2.50
  -1  11  -5   50.04    2.07
  -1  11  -5   51.86    2.24
  -1  11  -5   50.38    2.17
  -1  11  -6   77.45    2.79
  -1  11  -6   77.94    2.70
   1 -11   6   78.24    3.19
   1 -11   6   78.80    3.33
  -1  11  -6   79.48    2.94
  -1  11  -6   77.13    2.79
  -1  11  -6   85.15    6.04
  -1  11  -6   77.97    2.78
   1 -11   6   75.85    5.96
   1 -11   6   83.02    3.00
  -1  11  -7   69.98    2.60
  -1  11  -7   70.76    2.69
  -1  11  -7   70.91    2.75
  -1  11  -7   68.10    2.54
   1 -11   7   67.86    3.11
   1 -11   7   75.98    2.46
  -1  11  -7   70.48    2.64
   1 -11   7   68.61    3.01
  -1  11  -8    0.89    0.53
   1 -11   8    0.30    0.85
  -1  11  -8   -0.03    0.68
  -1  11  -8    0.30    0.68
  -1  11  -8    0.83    0.62
   1 -11   8    1.70    0.94
   1 -11   8    1.07    0.53
  -1  11  -9   70.21    2.60
   1 -11   9   63.94    2.50
   1 -11   9   66.04    2.80
  -1  11  -9   66.15    2.63
   1 -11   9   71.60    2.74
  -1  11  -9   69.63    2.68
   1 -11   9   69.36    2.94
   1 -11   9   74.77    2.49
   1 -11   9   74.24    3.09
   1 -11  10  305.75    6.66
  -1  11 -10  292.34    6.19
   1 -11  10  293.15    6.40
  -1  11 -10  302.70    6.14
  -1  11 -10  310.59    6.32
   1 -11  10  307.85    5.88
   1 -11  10  287.26    5.96
   1 -11  10  309.63    6.81
   1 -11  10  293.04    6.08
   1 -11  10  309.92    6.00
   1 -11  11    4.54    0.99
  -1  11 -11    4.15    0.86
  -1  11 -11    5.34    0.98
   1 -11  11    4.23    0.82
  -1  11 -11    4.60    0.66
   1 -11  11    4.53    0.74
   1 -11  11    4.20    0.73
   1 -11  12   58.18    2.25
   1 -11  12   64.36    2.19
  -1  11 -12   64.78    2.37
   1 -11  12   62.27    2.53
  -1  11 -12   63.33    2.41
   1 -11  12   63.25    2.20
   1 -11  13  151.35    3.53
   1 -11  13  157.70    3.95
  -1  11 -13  159.20    3.69
  -1  11 -13  154.72    3.76
   1 -11  13  153.06    3.47
   1 -11  13  156.50    3.51
   1 -11  14   10.08    0.79
  -1  11 -14   10.18    0.86
   1 -11  14   10.16    0.96
  -1  11 -14   10.68    0.97
   1 -11  15    0.13    0.33
  -1  11 -15    0.06    0.45
   1 -11  15    0.42    0.18
  -1  11 -15    0.25    0.34
   1 -11  15    0.42    0.45
   1 -11  16   14.09    0.66
   1 -11  16   13.63    0.79
  -1  11 -16   15.05    0.69
  -1  10  22   40.03    1.16
  -1  10  22   38.98    1.10
  -1  10  21  101.22    2.16
  -1  10  21  104.79    2.37
  -1  10  21  103.42    2.30
  -1  10  21  105.46    2.38
  -1  10  20   83.71    2.28
  -1  10  20   85.53    2.29
  -1  10  20   80.98    2.22
  -1  10  20   83.41    2.30
  -1  10  20   80.81    2.14
  -1  10  19   23.22    1.29
  -1  10  19   21.91    1.19
  -1  10  19   20.26    1.19
  -1  10  19   21.45    1.25
  -1  10  19   22.16    1.31
  -1  10  19   24.44    1.22
  -1  10  18  243.03    4.96
  -1  10  18  231.84    5.16
  -1  10  18  256.79    5.13
  -1  10  18  246.79    4.96
  -1  10  18  243.65    4.90
  -1  10  17  165.15    3.95
  -1  10  17  157.99    4.23
  -1  10  17  163.17    3.91
  -1  10  17  156.14    3.99
  -1  10  17  158.80    4.03
  -1  10  17  163.17    4.24
   1 -10 -17  170.99    8.38
  -1  10  16    3.34    0.71
  -1  10  16    2.65    0.73
  -1  10  16    4.11    0.75
  -1  10  16    5.01    0.91
  -1  10  16    3.99    0.90
  -1  10  16    3.14    0.72
  -1  10  15   11.76    1.13
  -1  10  15   10.67    1.25
  -1  10  15   11.56    1.25
  -1  10  15   12.60    1.12
  -1  10  15   10.35    1.06
  -1  10  14  183.87    4.75
  -1  10  14  178.85    4.32
  -1  10  14  176.00    4.49
  -1  10  14  177.72    4.36
  -1  10  14  173.62    4.76
  -1  10  13  171.27    4.27
  -1  10  13  169.72    4.51
  -1  10  13  168.97    4.68
  -1  10  13  167.15    4.13
  -1  10  13  165.73    4.32
  -1  10  12    4.92    0.74
  -1  10  12    4.28    0.66
  -1  10  12    3.59    0.70
  -1  10  12    2.32    1.04
  -1  10  12    3.76    0.85
  -1  10  12    3.48    0.79
   1 -10 -12    5.54    1.95
  -1  10  12    4.16    0.76
  -1  10  11   58.20    4.76
   1 -10 -11   53.42    4.61
  -1  10  11   54.22    2.33
  -1  10  11   53.23    2.45
   1 -10 -11   52.72    4.59
  -1  10  11   54.61    2.22
  -1  10  11   53.55    2.23
  -1  10  11   52.08    2.10
   1 -10 -11   55.93    4.38
  -1  10  11   58.32    2.18
  -1  10  10   77.69    2.75
  -1  10  10   73.00    2.46
  -1  10  10   76.32    2.57
   1 -10 -10   76.00    5.39
  -1  10  10   80.71    2.79
  -1  10  10   72.98    2.67
  -1  10  10   79.44    2.70
  -1  10  10   77.52    2.88
  -1  10  10   74.13    2.60
   1 -10 -10   66.81    4.77
   1 -10 -10   69.47    5.14
  -1  10  10   80.25    5.46
  -1  10   9    1.90    0.57
  -1  10   9   -1.11    0.74
  -1  10   9    1.40    0.49
  -1  10   9    0.59    0.46
  -1  10   9   -0.13    1.32
  -1  10   9    0.37    0.55
  -1  10   9    0.59    0.46
   1 -10  -9   -1.18    1.51
  -1  10   9   -0.26    0.67
   1 -10  -8   71.82    4.96
   1 -10  -8   78.99    5.28
  -1  10   8   84.83    5.42
  -1  10   7   12.97    2.31
   1 -10  -7    6.15    1.70
   1 -10  -6   44.68    3.37
  -1  10   6   41.56    3.72
   1 -10  -6   36.23    3.77
   1 -10  -6   43.57    3.90
  -1  10   5    0.99    1.10
   1 -10  -5    0.90    1.13
   1 -10  -5    1.54    1.66
   1 -10  -5    3.27    1.08
   1 -10  -5    1.75    1.31
  -1  10   4    9.19    1.90
   1 -10  -4    8.12    1.72
   1 -10  -4    7.56    2.12
   1 -10  -4    9.35    2.14
   1 -10  -3   74.06    5.36
   1 -10  -3   81.51    5.69
   1 -10  -3   84.01    5.89
   1 -10  -3   80.44    4.91
  -1  10   3   87.78    5.16
   1 -10  -2  190.51    8.67
   1 -10  -2  194.80    8.00
   1 -10  -2  190.75    9.01
   1 -10  -2  204.61    8.96
  -1  10   2  202.25    7.99
  -1  10   1   68.43    4.61
   1 -10  -1   69.65    4.81
   1 -10  -1   70.11    5.62
   1 -10  -1   70.61    5.17
   1 -10  -1   60.25    5.07
   1 -10  -1   68.16    5.57
   1 -10   0   61.50    5.11
  -1  10   0   60.09    4.38
   1 -10   0   54.48    4.61
   1 -10   0   57.62    5.18
   1 -10   0   62.02    4.60
   1 -10   0   59.81    5.28
   1 -10   1   20.02    2.88
  -1  10  -1   20.42    2.58
   1 -10   1   18.95    3.29
   1 -10   1   17.00    2.63
   1 -10   2  135.36    7.20
  -1  10  -2  134.94    6.87
   1 -10   2  125.92    6.96
   1 -10   2  137.63    8.06
   1 -10   3   96.67    6.19
  -1  10  -3  102.76    6.10
   1 -10   3   96.68    6.06
   1 -10   3   99.24    7.02
  -1  10  -4   89.99    2.82
   1 -10   4   84.76    3.14
   1 -10   4   76.99    5.66
  -1  10  -4   82.70    2.77
   1 -10   4   81.12    5.72
  -1  10  -4   90.23    2.80
  -1  10  -4   88.51    5.77
   1 -10   4   80.10    6.53
   1 -10   4   89.19    5.77
  -1  10  -4   89.72    2.90
  -1  10  -5  108.65    3.24
  -1  10  -5  110.47    3.22
  -1  10  -5  112.82    3.33
   1 -10   5  104.98    3.57
   1 -10   5   99.65    6.22
   1 -10   5  104.99    3.40
  -1  10  -5  105.87    3.18
  -1  10  -5  106.60    6.48
  -1  10  -5  103.15    3.15
   1 -10   5  100.92    6.50
  -1  10  -6    4.13    0.73
  -1  10  -6    3.25    0.73
   1 -10   6    3.73    1.56
   1 -10   6    4.30    0.60
   1 -10   6    3.17    0.89
  -1  10  -6    2.88    1.56
   1 -10   6    4.07    0.89
  -1  10  -6    3.77    0.66
  -1  10  -6    3.00    0.63
   1 -10   6    3.09    1.33
   1 -10   6    4.05    0.77
  -1  10  -6    3.34    0.67
  -1  10  -6    4.72    0.78
   1 -10   7   52.57    2.56
  -1  10  -7   56.42    2.38
  -1  10  -7   53.87    2.23
  -1  10  -7   51.13    2.16
  -1  10  -7   53.29    4.75
  -1  10  -7   57.65    2.37
  -1  10  -7   54.51    2.30
   1 -10   7   56.28    4.99
   1 -10   7   55.20    2.68
   1 -10   7   55.42    2.10
  -1  10  -7   54.52    2.33
   1 -10   7   57.54    2.48
  -1  10  -8    2.38    0.67
  -1  10  -8    2.83    0.70
  -1  10  -8    3.13    0.77
   1 -10   8    1.71    0.54
  -1  10  -8    2.87    0.61
   1 -10   8    4.13    1.40
   1 -10   8    1.73    0.83
   1 -10   8    0.53    0.93
  -1  10  -8    3.28    0.81
   1 -10   8    1.72    0.56
   1 -10   9   30.80    2.02
  -1  10  -9   33.08    1.87
   1 -10   9   35.94    1.84
   1 -10   9   31.89    1.97
   1 -10   9   36.12    1.95
   1 -10   9   33.75    1.69
  -1  10  -9   33.72    1.91
  -1  10  -9   34.73    1.84
   1 -10   9   34.77    2.18
  -1  10  -9   35.98    1.89
  -1  10 -10   87.81    3.01
   1 -10  10   87.34    3.32
  -1  10 -10   88.27    2.85
   1 -10  10   93.16    3.00
  -1  10 -10   95.85    3.09
   1 -10  10   91.14    3.05
  -1  10 -10   92.18    3.17
  -1  10 -10   89.36    3.12
   1 -10  10   88.16    2.99
   1 -10  10   92.73    3.43
   1 -10  10   84.70    3.16
   1 -10  10   91.69    2.90
  -1  10 -11   25.94    1.68
   1 -10  11   24.84    1.55
  -1  10 -11   27.33    1.68
  -1  10 -11   27.28    1.74
  -1  10 -11   25.30    1.49
   1 -10  11   27.19    1.56
   1 -10  11   24.83    1.81
   1 -10  11   25.14    1.64
   1 -10  11   26.85    1.57
   1 -10  12   29.81    1.67
  -1  10 -12   32.99    1.84
  -1  10 -12   29.93    1.57
   1 -10  12   28.31    1.60
  -1  10 -12   31.16    1.79
  -1  10 -12   29.21    1.66
   1 -10  12   29.97    1.88
   1 -10  12   31.22    1.63
  -1  10 -13   20.60    1.49
  -1  10 -13   19.67    1.36
   1 -10  13   20.57    1.56
  -1  10 -13   17.85    1.20
  -1  10 -13   18.67    1.44
   1 -10  13   18.75    1.26
   1 -10  13   19.17    1.25
   1 -10  13   20.15    1.30
   1 -10  14   67.41    2.24
   1 -10  14   66.29    2.21
  -1  10 -14   64.34    2.14
   1 -10  14   68.25    2.51
  -1  10 -14   72.37    2.33
  -1  10 -14   68.26    2.44
   1 -10  15    5.77    0.72
  -1  10 -15    4.43    0.63
  -1  10 -15    6.64    0.84
  -1  10 -15    5.03    0.60
   1 -10  15    5.99    0.81
   1 -10  16   -0.19    0.39
   1 -10  16    0.09    0.49
  -1  10 -16    0.49    0.45
  -1  10 -16    0.15    0.33
  -1  10 -16    0.40    0.27
   1 -10  17   19.11    0.90
   1 -10  17   19.19    0.82
  -1   9  22   17.89    0.84
  -1   9  22   16.32    0.71
  -1   9  22   17.50    0.79
  -1   9  21    2.12    0.40
  -1   9  21    2.52    0.43
  -1   9  21    3.34    0.43
  -1   9  20  169.19    3.50
  -1   9  20  175.48    3.72
  -1   9  20  174.48    3.59
  -1   9  19   46.01    1.89
  -1   9  19   48.81    1.93
  -1   9  19   47.32    1.78
  -1   9  18   -0.13    0.59
  -1   9  18    0.32    0.59
  -1   9  18   -0.38    0.74
  -1   9  18    0.18    0.49
  -1   9  17   24.39    1.63
  -1   9  17   27.68    1.57
  -1   9  17   23.58    1.49
  -1   9  17   23.42    1.58
  -1   9  17   25.38    1.57
  -1   9  17   27.37    1.52
  -1   9  16   52.79    2.17
  -1   9  16   50.14    2.22
   1  -9 -16   49.73    4.69
  -1   9  16   47.55    2.19
  -1   9  16   53.15    2.21
  -1   9  16   48.87    2.33
  -1   9  16   49.86    2.32
  -1   9  15    2.93    0.87
  -1   9  15    3.28    0.71
   1  -9 -15    4.13    1.75
  -1   9  15    2.48    0.80
  -1   9  15    1.39    0.64
  -1   9  15    3.07    0.70
  -1   9  14    0.93    0.55
   1  -9 -14   -0.55    1.73
  -1   9  14    0.52    0.78
  -1   9  14    0.93    0.53
  -1   9  14    1.76    0.70
  -1   9  14    0.22    0.62
  -1   9  13   57.44    2.38
  -1   9  13   59.57    4.59
  -1   9  13   61.48    2.33
  -1   9  13   58.35    2.57
  -1   9  13   64.41    2.40
   1  -9 -13   66.38    5.43
  -1   9  13   57.97    2.48
   1  -9 -13   58.94    4.71
  -1   9  12   15.32    1.16
  -1   9  12   15.12    1.22
  -1   9  12   14.55    1.07
   1  -9 -12   15.44    2.43
  -1   9  12   13.86    1.22
  -1   9  12   15.21    1.15
   1  -9 -12   15.52    2.66
   1  -9 -12   16.68    2.53
  -1   9  12   13.29    2.24
  -1   9  12   14.55    1.31
   1  -9 -11   31.52    3.54
   1  -9 -11   32.37    3.24
  -1   9  11   33.13    1.60
  -1   9  11   34.20    3.57
  -1   9  11   32.05    1.66
  -1   9  11   29.88    1.68
  -1   9  11   33.09    1.68
  -1   9  11   33.07    1.71
  -1   9  11   33.90    1.89
   1  -9 -11   30.80    3.17
  -1   9  11   31.90    1.61
   1  -9 -10  619.03   15.59
  -1   9  10  662.09   16.74
  -1   9  10  640.76   10.25
   1  -9 -10  680.81   15.69
   1  -9 -10  648.45   16.70
   1  -9  -9   19.60    2.27
   1  -9  -9   18.08    2.54
  -1   9   9   21.47    2.81
   1  -9  -8   35.52    3.38
   1  -9  -8   37.47    3.43
  -1   9   8   45.60    3.81
   1  -9  -7  663.91   15.87
   1  -9  -7  688.18   16.17
   1  -9  -6   53.76    3.36
  -1   9   6   54.67    4.00
   1  -9  -6   47.90    3.67
   1  -9  -6   46.27    3.68
  -1   9   5   44.55    3.52
   1  -9  -5   39.02    3.00
   1  -9  -5   37.29    3.33
   1  -9  -4    6.94    1.85
   1  -9  -4    5.83    1.56
   1  -9  -4    7.35    1.47
  -1   9   4    9.26    1.83
   1  -9  -4    6.21    1.55
   1  -9  -3  262.59    9.45
   1  -9  -3  262.90    8.62
   1  -9  -3  254.35    9.61
  -1   9   3  280.96    8.94
   1  -9  -2  358.23   11.34
   1  -9  -2  355.67   11.61
   1  -9  -2  338.62   10.22
  -1   9   2  369.62   10.46
   1  -9  -1  123.77    6.43
  -1   9   1  128.90    5.92
   1  -9  -1  117.23    6.35
   1  -9  -1  115.75    6.54
   1  -9  -1  112.34    5.70
  -1   9   0    6.55    1.67
   1  -9   0    5.63    1.87
   1  -9   0    8.48    2.44
   1  -9   0    5.84    1.76
   1  -9   0    8.29    2.35
  -1   9  -1  161.91    6.88
   1  -9   1  161.63    7.99
   1  -9   1  150.89    7.20
   1  -9   1  150.52    7.53
   1  -9   1  145.67    7.73
   1  -9   2  109.70    6.69
  -1   9  -2  111.84    5.78
   1  -9   2   98.75    5.80
   1  -9   3   92.80    5.57
   1  -9   3   93.72    6.35
  -1   9  -3   87.17    5.28
   1  -9   4  122.61    6.39
   1  -9   4  114.59    6.47
   1  -9   4  113.17    7.21
  -1   9  -4  121.85    6.38
   1  -9   4  122.05    6.59
   1  -9   5  231.07    9.53
   1  -9   5  236.48    9.24
  -1   9  -5  254.39    9.78
   1  -9   5  241.08    9.09
  -1   9  -6  177.87    4.22
  -1   9  -6  169.67    8.12
   1  -9   6  160.19    7.50
  -1   9  -6  173.96    4.19
   1  -9   6  168.71    4.60
  -1   9  -6  178.82    4.27
   1  -9   6  160.24    8.10
  -1   9  -6  170.70    4.18
  -1   9  -7   57.27    2.35
  -1   9  -7   52.62    2.14
   1  -9   7   48.29    4.48
   1  -9   7   64.51    2.58
  -1   9  -7   60.80    2.36
   1  -9   7   55.14    2.09
   1  -9   7   61.38    2.75
  -1   9  -7   71.14    5.31
   1  -9   7   59.88    2.62
  -1   9  -7   59.35    2.35
  -1   9  -7   57.79    2.24
  -1   9  -7   57.88    2.32
  -1   9  -8  221.56    4.97
   1  -9   8  216.27    9.76
  -1   9  -8  230.77    5.25
  -1   9  -8  226.65    4.95
   1  -9   8  228.75    5.62
  -1   9  -8  231.78   10.04
   1  -9   8  224.70    5.09
  -1   9  -8  233.19    5.26
   1  -9   8  229.34    4.91
  -1   9  -8  217.65    4.93
  -1   9  -8  233.10    5.20
  -1   9  -8  234.65    5.26
   1  -9   8  226.44    5.67
   1  -9   9   63.07    2.78
  -1   9  -9   60.04    2.50
  -1   9  -9   62.80    2.31
   1  -9   9   57.82    2.46
   1  -9   9   58.14    2.26
   1  -9   9   59.37    2.73
  -1   9  -9   60.51    2.52
  -1   9  -9   56.98    2.33
  -1   9  -9   61.32    2.53
  -1   9  -9   56.87    2.38
  -1   9  -9   57.48    5.06
  -1   9  -9   57.10    2.28
   1  -9   9   47.90    4.47
   1  -9   9   59.76    2.39
   1  -9   9   54.04    2.54
   1  -9  10    1.59    0.60
  -1   9 -10    3.00    0.85
   1  -9  10    2.64    0.95
   1  -9  10    2.27    0.62
  -1   9 -10    2.77    0.71
  -1   9 -10    2.23    0.61
   1  -9  10    1.84    0.72
   1  -9  10    3.99    0.96
   1  -9  10    3.30    0.76
   1  -9  10    2.74    0.60
  -1   9 -10    2.64    0.77
  -1   9 -10    2.25    0.66
  -1   9 -11    7.90    1.10
   1  -9  11    9.20    1.02
   1  -9  11    8.31    1.17
  -1   9 -11    9.36    1.14
   1  -9  11    8.90    1.02
  -1   9 -11    9.61    1.10
   1  -9  11    8.88    1.21
  -1   9 -11    8.83    1.01
   1  -9  11    9.33    1.05
   1  -9  11    9.62    1.12
  -1   9 -11    9.04    1.00
  -1   9 -12   59.85    2.42
   1  -9  12   59.93    2.41
  -1   9 -12   57.29    2.34
  -1   9 -12   59.20    2.54
   1  -9  12   54.85    2.36
  -1   9 -12   57.52    2.49
   1  -9  12   60.22    2.37
   1  -9  12   57.98    2.64
  -1   9 -13   96.92    3.21
   1  -9  13   97.25    3.02
  -1   9 -13   96.32    3.05
   1  -9  13   95.67    3.02
   1  -9  13  101.58    3.11
  -1   9 -13   92.43    3.00
  -1   9 -13   98.95    3.26
   1  -9  13   96.55    3.33
  -1   9 -14   12.94    1.12
   1  -9  14   14.64    1.07
  -1   9 -14   14.73    1.30
  -1   9 -14   15.81    1.21
  -1   9 -14   14.74    1.34
   1  -9  14   15.30    1.18
   1  -9  14   16.72    1.44
   1  -9  14   16.00    1.25
  -1   9 -15   35.57    1.81
   1  -9  15   37.96    1.69
   1  -9  15   36.07    1.83
  -1   9 -15   34.05    1.59
  -1   9 -15   33.03    1.60
   1  -9  16   78.23    2.43
   1  -9  16   76.99    2.27
  -1   9 -16   74.05    2.39
  -1   9 -16   70.58    2.20
  -1   9 -16   74.48    2.15
   1  -9  17   12.84    0.88
  -1   9 -17   11.13    0.69
  -1   9 -17   11.30    0.77
   1  -9  17   12.70    0.84
  -1   9 -17   11.98    0.89
  -1   9 -18    3.84    0.47
   1  -9  18    3.74    0.42
  -1   8  23   16.91    0.68
  -1   8  22  100.29    2.25
  -1   8  22   94.64    2.11
  -1   8  22   95.87    2.22
  -1   8  21   21.65    0.93
  -1   8  21   22.85    1.15
  -1   8  21   22.94    1.00
  -1   8  20    0.02    0.38
  -1   8  20    0.49    0.38
  -1   8  20    0.18    0.65
  -1   8  19   28.44    1.41
  -1   8  19   32.03    1.38
  -1   8  19   32.83    1.65
  -1   8  19   31.34    1.56
  -1   8  18  174.83    4.17
  -1   8  18  168.65    3.98
  -1   8  18  171.98    3.75
  -1   8  18  168.59    3.97
  -1   8  18  167.93    4.24
   1  -8 -18  160.25    8.00
  -1   8  18  163.57    4.16
  -1   8  17    6.37    0.85
  -1   8  17    6.01    0.87
  -1   8  17    6.50    0.92
  -1   8  17    7.53    1.03
  -1   8  17    4.82    0.77
  -1   8  17    4.75    0.81
  -1   8  17    7.27    0.77
   1  -8 -16   83.17    5.73
  -1   8  16   72.59    2.74
  -1   8  16   76.96    2.65
  -1   8  16   70.78    2.79
  -1   8  16   78.78    2.74
  -1   8  16   74.81    2.87
  -1   8  16   75.75    2.75
   1  -8 -16   72.11    5.78
  -1   8  16   77.01    2.40
  -1   8  15   58.17    2.34
   1  -8 -15   65.28    5.40
  -1   8  15   56.47    2.49
  -1   8  15   58.37    2.28
  -1   8  15   58.92    2.45
  -1   8  15   54.00    2.46
   1  -8 -15   55.87    4.64
  -1   8  15   54.04    2.36
   1  -8 -14   66.63    4.94
  -1   8  14   68.37    2.77
  -1   8  14   64.46    2.55
  -1   8  14   71.40    2.75
  -1   8  14   72.99    2.58
   1  -8 -13    6.29    1.58
  -1   8  13    4.69    0.75
  -1   8  13    7.11    1.64
  -1   8  13    5.23    0.90
   1  -8 -13    3.14    1.23
  -1   8  13    8.01    0.83
   1  -8 -13    2.57    1.24
  -1   8  13    7.81    0.91
  -1   8  13    4.49    0.74
  -1   8  12  379.13    7.18
   1  -8 -12  404.05   13.14
  -1   8  12  362.65    6.90
  -1   8  12  382.88    6.91
   1  -8 -12  384.45   11.51
  -1   8  12  361.72    6.94
  -1   8  12  387.86   11.96
  -1   8  12  362.17    7.24
   1  -8 -12  339.53   11.19
   1  -8 -11  225.01    8.52
  -1   8  11  244.45    9.04
   1  -8 -11  228.37    8.32
   1  -8 -11  244.88    9.66
  -1   8  11  224.96    9.15
  -1   8  10    9.11    1.73
   1  -8 -10   10.58    1.82
   1  -8 -10   10.36    1.99
   1  -8 -10    9.96    1.64
  -1   8  10   14.60    2.35
  -1   8   9  330.93   10.18
   1  -8  -9  323.58   10.50
  -1   8   9  317.48   10.31
  -1   8   8  431.79   11.58
  -1   8   8  429.80   11.87
   1  -8  -8  401.12   11.60
   1  -8  -7   76.75    4.58
   1  -8  -7   87.35    4.20
  -1   8   7   88.03    4.82
  -1   8   7   86.22    4.86
  -1   8   6 1202.05   21.88
   1  -8  -6 1199.14   19.70
   1  -8  -6 1124.34   21.53
   1  -8  -6 1193.49   19.67
   1  -8  -6 1095.01   21.22
   1  -8  -5  657.48   13.24
  -1   8   5  661.59   14.43
   1  -8  -5  619.65   14.21
   1  -8  -5  617.90   13.94
   1  -8  -4  689.86   15.02
   1  -8  -4  690.63   14.24
  -1   8   4  725.78   15.14
   1  -8  -3   75.57    4.82
  -1   8   3   82.89    4.40
   1  -8  -3   81.52    4.23
   1  -8  -3   85.59    4.57
   1  -8  -3   78.77    4.70
  -1   8   2   59.90    3.72
   1  -8  -2   63.91    4.47
   1  -8  -2   56.46    4.14
   1  -8  -1  139.41    6.44
  -1   8   1  133.11    5.67
   1  -8  -1  131.20    6.48
   1  -8   0  203.12    8.28
  -1   8   0  206.80    7.20
   1  -8   0  208.67    8.10
   1  -8   0  206.13    7.81
   1  -8   1  272.75    9.87
   1  -8   1  279.66    9.16
   1  -8   1  273.90    9.80
   1  -8   1  272.44    9.61
  -1   8  -1  267.67    8.52
   1  -8   2   93.00    5.21
  -1   8  -2   94.07    4.97
   1  -8   2   92.77    5.76
   1  -8   3   55.19    3.99
  -1   8  -3   57.69    4.01
   1  -8   3   56.00    4.64
   1  -8   4  115.50    5.76
   1  -8   4  114.07    6.65
  -1   8  -4  102.19    5.61
  -1   8  -5  192.06    7.97
   1  -8   5  212.75    7.89
   1  -8   5  191.82    7.85
   1  -8   6  160.21    6.70
   1  -8   6  153.87    6.83
  -1   8  -6  153.49    7.30
   1  -8   7  116.61    6.59
   1  -8   7  121.92    5.99
  -1   8  -7  122.77    6.76
  -1   8  -8   15.69    1.23
  -1   8  -8   15.95    1.16
  -1   8  -8   17.35    1.27
   1  -8   8   18.37    1.49
   1  -8   8   12.28    2.36
  -1   8  -8   17.00    1.23
   1  -8   8   15.17    1.09
  -1   8  -8   22.84    3.04
  -1   8  -8   16.62    1.21
   1  -8   8   18.15    1.48
  -1   8  -9  149.02    3.90
   1  -8   9  153.58    4.02
   1  -8   9  140.11    7.46
  -1   8  -9  155.73    4.09
   1  -8   9  153.22    4.39
   1  -8   9  147.83    4.18
   1  -8   9  156.35    4.43
  -1   8  -9  149.14    4.05
  -1   8  -9  155.02    3.98
  -1   8  -9  151.99    3.91
   1  -8   9  151.21    3.83
   1  -8   9  146.72    4.06
  -1   8  -9  153.32    4.02
  -1   8 -10  635.15   10.34
   1  -8  10  632.35   10.52
  -1   8 -10  623.46   10.38
  -1   8 -10  631.09   10.59
   1  -8  10  612.64   10.65
  -1   8 -10  652.14   10.60
  -1   8 -10  630.80   10.63
  -1   8 -10  614.66   10.27
   1  -8  10  625.05   10.96
   1  -8  10  620.52   10.47
   1  -8  10  625.78   10.23
   1  -8  10  636.10   11.09
  -1   8 -11   13.41    1.21
  -1   8 -11   11.11    1.12
   1  -8  11   11.76    1.34
  -1   8 -11   13.43    1.34
  -1   8 -11   12.58    1.19
   1  -8  11   12.92    1.22
   1  -8  11   13.40    1.20
   1  -8  11   11.90    1.17
  -1   8 -11   12.47    1.23
   1  -8  11   12.59    1.24
   1  -8  11   13.76    1.44
   1  -8  12    7.91    1.02
  -1   8 -12    7.78    0.92
  -1   8 -12    6.49    0.83
  -1   8 -12    6.29    1.10
   1  -8  12    6.79    0.96
  -1   8 -12    6.75    0.98
   1  -8  12    7.35    1.02
   1  -8  12    7.69    1.01
   1  -8  12    8.62    1.21
  -1   8 -12    6.53    1.01
  -1   8 -12    5.92    0.91
  -1   8 -13  254.96    5.74
  -1   8 -13  252.10    5.45
  -1   8 -13  260.33    5.34
  -1   8 -13  242.92    5.59
   1  -8  13  259.73    5.65
  -1   8 -13  253.81    5.52
   1  -8  13  252.02    5.53
   1  -8  13  257.93    5.96
   1  -8  13  258.78    5.55
  -1   8 -13  257.45    5.83
   1  -8  14  145.72    3.91
   1  -8  14  146.63    4.14
  -1   8 -14  145.98    4.03
  -1   8 -14  138.71    3.71
  -1   8 -14  147.18    4.12
   1  -8  14  144.57    3.71
   1  -8  14  145.54    3.85
  -1   8 -14  134.76    3.87
  -1   8 -14  150.12    3.85
  -1   8 -15    7.09    0.92
  -1   8 -15    7.41    1.13
  -1   8 -15    6.41    0.99
   1  -8  15    6.69    0.90
   1  -8  15    8.11    1.13
   1  -8  15    7.49    1.03
  -1   8 -15    5.83    0.78
  -1   8 -15    5.96    0.94
   1  -8  16   58.54    2.14
  -1   8 -16   53.75    2.11
   1  -8  16   55.38    2.22
  -1   8 -16   55.46    1.97
  -1   8 -16   56.53    2.24
  -1   8 -16   55.28    2.14
  -1   8 -16   53.40    1.93
  -1   8 -17  102.62    2.51
  -1   8 -17  104.07    2.85
  -1   8 -17   99.39    2.75
   1  -8  17  107.12    2.73
   1  -8  17  106.98    2.85
  -1   8 -18   23.54    1.17
  -1   8 -18   21.11    0.84
  -1   8 -18   22.69    1.10
   1  -8  18   24.21    1.09
  -1   8 -19    0.07    0.27
   1  -8  19    0.02    0.25
  -1   7  23   20.06    0.78
  -1   7  23   21.72    0.82
  -1   7  22    1.06    0.37
  -1   7  22    0.96    0.31
  -1   7  21  142.27    2.94
  -1   7  21  147.17    3.25
  -1   7  21  144.30    3.01
  -1   7  20  135.19    3.33
  -1   7  20  131.62    3.07
  -1   7  20  130.46    3.06
  -1   7  19   22.87    1.28
  -1   7  19   22.71    1.42
  -1   7  19   22.88    1.27
   1  -7 -19   24.09    3.14
  -1   7  18    3.60    0.77
  -1   7  18    3.68    0.62
  -1   7  18    3.64    0.69
   1  -7 -18    3.61    1.41
  -1   7  18    5.20    0.80
  -1   7  18    4.60    0.81
  -1   7  18    4.78    0.84
  -1   7  17  386.01    7.21
  -1   7  17  384.04    7.10
   1  -7 -17  386.61   13.24
  -1   7  17  381.49    6.82
  -1   7  17  386.94    7.04
  -1   7  17  369.39    7.30
  -1   7  17  379.08    7.36
  -1   7  16   32.17    1.77
  -1   7  16   34.04    1.62
  -1   7  16   34.10    1.90
   1  -7 -16   37.58    3.72
  -1   7  16   35.17    1.75
  -1   7  16   33.16    1.88
   1  -7 -16   36.23    3.96
  -1   7  16   34.74    1.91
  -1   7  16   31.04    1.71
  -1   7  15   -0.82    0.64
  -1   7  15    0.55    0.56
  -1   7  15    1.95    0.96
  -1   7  15   -0.86    0.79
  -1   7  15    0.82    0.41
   1  -7 -15    2.07    1.06
  -1   7  15    0.72    0.62
  -1   7  15    1.02    0.62
  -1   7  15    0.30    0.50
   1  -7 -15   -0.22    0.89
  -1   7  15   -0.32    0.82
  -1   7  14    6.24    0.73
  -1   7  14    7.94    0.87
   1  -7 -14    6.58    1.51
  -1   7  14    8.25    0.90
  -1   7  14    9.16    0.99
  -1   7  14    8.98    1.06
  -1   7  14    9.76    1.95
  -1   7  14    8.92    0.93
  -1   7  14    7.68    0.95
   1  -7 -14    7.07    1.82
  -1   7  13  160.46    3.97
   1  -7 -13  156.90    7.48
  -1   7  13  161.53    4.02
  -1   7  13  164.98    4.24
  -1   7  13  166.94    7.49
   1  -7 -13  156.25    6.94
  -1   7  13  156.78    4.06
  -1   7  13  168.16    3.99
  -1   7  13  155.33    4.22
   1  -7 -12  173.40    7.49
   1  -7 -12  178.98    7.63
  -1   7  12  190.17    7.81
  -1   7  11  459.35   12.49
   1  -7 -11  417.73   11.89
   1  -7 -11  429.61   11.95
   1  -7 -11  450.14   11.18
  -1   7  10  547.26   13.50
  -1   7  10  556.56   14.07
  -1   7   9  245.57    8.55
   1  -7  -9  223.83    7.80
  -1   7   9  237.45    8.07
  -1   7   8  462.80   11.95
  -1   7   8  479.50   11.87
   1  -7  -8  448.91   11.86
   1  -7  -7  444.78   11.33
  -1   7   7  436.15   11.26
  -1   7   7  437.34   11.05
   1  -7  -6  147.08    4.68
   1  -7  -6  128.11    5.48
  -1   7   6  138.02    5.59
  -1   7   6  141.09    5.79
   1  -7  -5  417.60   10.36
   1  -7  -5  433.23    9.08
   1  -7  -5  413.02    9.17
  -1   7   5  412.89   10.37
   1  -7  -5  410.82   10.16
  -1   7   5  388.32    9.98
   1  -7  -4 1439.83   20.61
  -1   7   4 1396.72   23.07
   1  -7  -4 1327.05   21.81
   1  -7  -4 1360.41   22.86
   1  -7  -4 1297.67   22.35
  -1   7   3   18.61    1.15
  -1   7   3   19.12    2.20
   1  -7  -3   24.16    2.28
   1  -7  -2  115.03    5.22
   1  -7  -2  111.53    5.39
  -1   7   2  115.21    4.85
   1  -7  -2  110.71    4.87
  -1   7   1   41.91    2.97
   1  -7  -1   42.24    3.32
   1  -7  -1   39.50    3.39
  -1   7   0 1001.83   18.22
   1  -7   0 1013.15   19.46
   1  -7   0 1001.08   19.60
   1  -7   0 1013.33   19.11
   1  -7   1   73.51    4.52
   1  -7   1   75.61    4.78
   1  -7   1   77.99    4.35
  -1   7  -1   63.22    3.78
   1  -7   1   70.82    4.60
   1  -7   2  269.48    9.33
  -1   7  -2  267.08    8.14
   1  -7   2  278.52    8.64
   1  -7   2  267.43    9.10
  -1   7  -3    0.08    1.12
   1  -7   3    0.55    0.40
   1  -7   3    0.10    1.37
   1  -7   3    1.03    0.98
  -1   7  -3    1.69    0.57
  -1   7  -4   62.98    4.11
  -1   7  -4   56.39    3.72
   1  -7   4   52.20    3.62
   1  -7   4   58.04    3.03
   1  -7   4   56.58    4.51
   1  -7   5  181.38    6.03
   1  -7   5  168.54    6.55
   1  -7   5  169.17    6.83
  -1   7  -5  171.21    6.83
   1  -7   6  102.15    4.80
  -1   7  -6  102.33    5.50
   1  -7   6   99.40    5.15
   1  -7   6  109.74    5.17
   1  -7   7    7.88    1.46
  -1   7  -7    8.29    1.85
   1  -7   7    9.96    1.59
   1  -7   8  573.44   13.96
  -1   7  -8  560.79   15.28
  -1   7  -9   72.36    2.58
   1  -7   9   69.66    2.38
   1  -7   9   64.69    4.54
   1  -7   9   73.38    2.80
  -1   7  -9   69.77    2.51
   1  -7   9   69.96    2.73
  -1   7  -9   66.38    5.17
  -1   7  -9   73.90    2.60
   1  -7   9   63.17    4.71
  -1   7  -9   68.51    2.40
  -1   7 -10   28.73    3.55
   1  -7  10   31.66    1.65
  -1   7 -10   32.44    1.67
   1  -7  10   34.47    1.96
   1  -7  10   34.37    1.81
  -1   7 -10   34.28    1.77
   1  -7  10   31.17    3.35
   1  -7  10   31.15    1.78
  -1   7 -10   34.39    1.82
  -1   7 -10   33.56    1.75
   1  -7  10   32.26    3.39
  -1   7 -10   34.14    1.85
  -1   7 -10   33.24    1.76
  -1   7 -10   34.60    1.72
   1  -7  10   35.59    1.98
  -1   7 -11  245.38    5.36
  -1   7 -11  252.66    5.65
   1  -7  11  237.94    9.79
   1  -7  11  244.12    5.78
  -1   7 -11  240.10    5.48
   1  -7  11  244.72    5.53
  -1   7 -11  257.26   11.05
  -1   7 -11  243.37    5.44
   1  -7  11  253.53    5.42
  -1   7 -11  250.78    5.57
   1  -7  11  235.93    5.40
   1  -7  11  253.77    5.95
  -1   7 -11  253.70    5.31
   1  -7  11  248.68    5.58
   1  -7  12  766.12   12.69
  -1   7 -12  745.83   12.31
   1  -7  12  735.68   12.20
  -1   7 -12  765.30   12.23
  -1   7 -12  771.66   11.87
  -1   7 -12  760.92   12.06
   1  -7  12  782.43   12.45
  -1   7 -12  776.54   12.40
  -1   7 -12  756.16   12.45
   1  -7  12  759.63   12.22
   1  -7  12  771.63   12.12
   1  -7  13   32.60    1.78
   1  -7  13   33.19    2.03
   1  -7  13   32.36    1.85
  -1   7 -13   33.13    1.94
  -1   7 -13   31.43    1.81
  -1   7 -13   32.48    1.92
  -1   7 -13   32.47    1.76
   1  -7  13   35.04    1.89
  -1   7 -13   32.87    1.99
   1  -7  14  249.18    5.76
   1  -7  14  249.30    5.42
   1  -7  14  240.49    5.49
  -1   7 -14  238.20    5.44
  -1   7 -14  244.49    5.33
  -1   7 -14  248.57    5.72
  -1   7 -14  234.56    5.54
   1  -7  14  241.84    5.22
  -1   7 -14  243.51    5.53
   1  -7  15  481.62    8.66
  -1   7 -15  470.67    8.57
  -1   7 -15  493.49    8.84
  -1   7 -15  497.25    8.71
  -1   7 -15  485.45    8.76
   1  -7  15  503.97    8.91
  -1   7 -15  487.69    8.41
   1  -7  15  501.45    8.59
  -1   7 -16   33.82    1.88
  -1   7 -16   32.54    1.59
  -1   7 -16   32.89    1.69
  -1   7 -16   34.57    1.78
  -1   7 -16   31.52    1.77
   1  -7  16   33.56    1.83
   1  -7  16   35.46    1.81
   1  -7  17    1.47    0.67
  -1   7 -17    1.36    0.47
  -1   7 -17    1.75    0.74
  -1   7 -17    0.85    0.68
  -1   7 -17    1.72    0.63
  -1   7 -17    1.28    0.53
   1  -7  17    1.66    0.69
   1  -7  18   24.41    1.24
  -1   7 -18   22.54    1.27
   1  -7  18   24.76    1.31
  -1   7 -18   22.69    1.27
  -1   7 -18   22.49    1.13
  -1   7 -18   21.82    0.97
  -1   7 -19   97.87    2.43
   1  -7  19  100.13    2.31
  -1   7 -19   99.36    2.42
  -1   6  23   25.49    0.91
  -1   6  23   25.79    0.85
  -1   6  22   12.41    0.75
  -1   6  22   13.11    0.81
  -1   6  21    6.23    0.64
  -1   6  21    6.70    0.57
  -1   6  21    6.68    0.72
  -1   6  20    7.39    0.85
  -1   6  20    6.73    0.75
  -1   6  20    7.95    0.72
   1  -6 -19  305.20   11.53
  -1   6  19  310.95    5.82
  -1   6  19  310.33    5.85
  -1   6  19  316.08    6.11
  -1   6  19  327.77    6.17
  -1   6  18   93.06    2.80
   1  -6 -18   84.05    6.04
  -1   6  18   92.92    2.79
  -1   6  18   91.66    2.94
   1  -6 -18   88.26    5.74
  -1   6  17    4.94    0.84
  -1   6  17    4.54    0.80
   1  -6 -17    4.48    1.44
  -1   6  17    4.28    0.74
  -1   6  17    4.62    0.73
   1  -6 -17    3.68    1.60
  -1   6  17    5.14    0.86
  -1   6  17    3.19    0.68
  -1   6  16  203.86    4.59
  -1   6  16  194.22    4.67
  -1   6  16  192.49    4.75
  -1   6  16  190.08    4.65
  -1   6  16  191.55    4.73
   1  -6 -16  191.45    9.09
   1  -6 -16  197.23    8.62
  -1   6  16  183.88    4.75
  -1   6  16  190.64    4.35
   1  -6 -15  548.03   15.87
  -1   6  15  590.19   15.44
  -1   6  15  559.14    9.60
  -1   6  15  563.67    9.43
  -1   6  15  551.26    9.44
  -1   6  15  524.61    9.49
  -1   6  15  556.49    9.01
  -1   6  15  564.13    9.29
  -1   6  15  562.15    9.41
  -1   6  15  552.54    9.25
   1  -6 -15  565.27   15.19
  -1   6  15  513.09    9.47
   1  -6 -14   83.97    5.21
   1  -6 -14   78.41    5.45
  -1   6  14   77.36    2.78
  -1   6  14   79.15    2.51
  -1   6  14   80.78    2.68
  -1   6  14   89.20    5.38
  -1   6  14   80.25    2.73
  -1   6  14   77.51    2.80
  -1   6  14   84.10    2.88
  -1   6  14   82.99    2.74
   1  -6 -13  139.69    6.97
  -1   6  13  147.26    3.70
  -1   6  13  139.61    3.79
  -1   6  13  147.99    3.72
  -1   6  13  156.84    7.02
   1  -6 -13  144.69    6.66
  -1   6  13  146.75    3.73
  -1   6  13  146.74    3.89
   1  -6 -12  243.48    8.06
   1  -6 -12  239.04    8.90
  -1   6  12  259.72    9.00
   1  -6 -12  247.07    8.86
   1  -6 -11   48.38    3.29
  -1   6  11   46.89    3.53
   1  -6 -11   40.51    3.32
   1  -6 -11   42.72    3.46
   1  -6 -10  216.80    7.55
  -1   6  10  210.94    7.93
  -1   6  10  225.13    7.72
   1  -6 -10  203.13    6.79
   1  -6  -9  243.48    7.79
  -1   6   9  254.46    8.05
  -1   6   9  240.87    8.22
  -1   6   8  194.36    7.07
  -1   6   8  215.92    7.06
   1  -6  -7  542.93    9.55
  -1   6   7  526.12   12.18
  -1   6   7  522.35   11.83
   1  -6  -6   42.43    2.14
  -1   6   6   44.29    3.06
  -1   6   6   42.45    3.04
   1  -6  -5 1037.39   17.94
  -1   6   5 1009.98   17.81
  -1   6   5 1023.18   14.20
   1  -6  -5 1028.39   16.25
  -1   6   5 1008.35   18.02
  -1   6   4  155.76    5.40
   1  -6  -4  159.17    5.36
  -1   6   4  157.26    5.51
  -1   6   4  168.78    3.56
  -1   6   3  187.82    5.90
  -1   6   3  188.10    3.88
   1  -6  -3  172.24    5.46
   1  -6  -3  191.08    4.62
   1  -6  -3  174.92    5.70
   1  -6  -2 1722.85   25.95
   1  -6  -2 1699.59   22.70
  -1   6   2 1721.22   26.03
  -1   6   1  584.95   11.71
   1  -6  -1  583.25   11.74
   1  -6  -1  588.81   12.47
   1  -6  -1  576.58   12.57
  -1   6   0   15.36    1.74
  -1   6   0   19.47    0.75
   1  -6   0   19.42    2.29
   1  -6   0   18.71    2.07
   1  -6   1   23.62    2.42
  -1   6  -1   29.45    1.32
   1  -6   1   26.57    2.58
   1  -6   1   26.89    2.82
  -1   6  -1   25.16    2.25
   1  -6   1   23.63    1.28
   1  -6   1   26.77    2.66
   1  -6   2  403.36    7.62
   1  -6   2  394.70   10.39
   1  -6   2  390.05   10.45
  -1   6  -2  387.52    9.08
   1  -6   2  389.51    9.76
   1  -6   2  398.56   10.69
  -1   6  -2  398.96    9.62
   1  -6   3   25.02    1.77
  -1   6  -3   23.84    2.42
   1  -6   3   23.86    2.33
  -1   6  -3   23.73    2.27
   1  -6   3   25.69    2.95
   1  -6   4  127.26    5.29
   1  -6   4  137.96    4.67
  -1   6  -4  136.03    5.45
   1  -6   4  130.27    6.28
   1  -6   5    1.92    0.90
   1  -6   5    4.57    1.30
  -1   6  -5    3.38    1.46
   1  -6   5    2.59    1.25
   1  -6   6  144.16    5.79
   1  -6   6  161.44    5.85
   1  -6   6  144.36    5.61
  -1   6  -6  149.34    6.40
   1  -6   7  136.97    5.64
   1  -6   7  138.92    5.90
   1  -6   7  142.29    5.39
  -1   6  -7  136.16    6.38
   1  -6   8  137.64    6.23
  -1   6  -8  137.32    6.77
  -1   6  -9  487.84   14.29
   1  -6   9  468.31   13.05
   1  -6  10  187.07    8.12
  -1   6 -10  187.22    4.27
  -1   6 -10  176.38    8.66
   1  -6  10  179.09    7.65
   1  -6  10  183.34    4.25
   1  -6  10  197.11    4.82
   1  -6  10  188.51    4.71
  -1   6 -10  187.46    4.44
  -1   6 -10  188.53    4.40
  -1   6 -10  186.59    4.50
  -1   6 -11   51.38    2.10
  -1   6 -11   47.73    2.18
   1  -6  11   48.82    2.28
   1  -6  11   50.48    2.21
   1  -6  11   47.57    2.11
  -1   6 -11   47.28    1.94
  -1   6 -11   49.31    2.17
   1  -6  11   45.36    4.13
  -1   6 -11   51.16    2.17
   1  -6  11   50.13    2.31
   1  -6  11   47.73    2.13
   1  -6  11   47.33    2.03
  -1   6 -11   47.48    4.60
   1  -6  12   70.29    2.61
   1  -6  12   73.12    2.72
  -1   6 -12   73.29    5.94
  -1   6 -12   71.85    2.60
   1  -6  12   73.20    2.79
   1  -6  12   71.65    5.49
  -1   6 -12   74.15    2.76
  -1   6 -12   72.22    2.81
   1  -6  12   72.31    2.65
   1  -6  12   72.33    2.88
  -1   6 -12   72.21    2.76
  -1   6 -12   69.53    2.75
  -1   6 -13  410.08    7.83
  -1   6 -13  406.11    7.95
  -1   6 -13  426.21    7.67
   1  -6  13  411.75    8.08
   1  -6  13  405.45    7.59
   1  -6  13  415.23    7.71
   1  -6  13  403.22    7.82
  -1   6 -13  399.99    7.93
  -1   6 -13  404.48    7.88
   1  -6  14  134.22    3.79
   1  -6  14  132.20    3.99
   1  -6  14  130.94    3.84
  -1   6 -14  127.80    3.88
  -1   6 -14  132.50    3.97
  -1   6 -14  129.22    3.81
  -1   6 -14  128.18    3.64
  -1   6 -14  128.98    3.96
   1  -6  14  135.58    3.65
   1  -6  15    3.53    0.90
  -1   6 -15    4.12    0.97
  -1   6 -15    6.30    1.11
  -1   6 -15    5.75    0.89
   1  -6  15    2.76    0.85
  -1   6 -15    4.27    0.89
  -1   6 -15    4.46    0.91
   1  -6  15    4.94    0.96
  -1   6 -16   81.97    2.96
  -1   6 -16   82.43    2.83
  -1   6 -16   83.97    2.67
   1  -6  16   83.40    2.96
   1  -6  16   85.55    2.86
  -1   6 -16   75.26    2.84
  -1   6 -16   80.80    2.92
  -1   6 -17  147.92    3.89
  -1   6 -17  144.50    3.69
   1  -6  17  147.66    3.84
  -1   6 -17  150.68    3.49
  -1   6 -17  139.23    3.79
  -1   6 -17  148.38    3.94
   1  -6  17  152.92    3.74
  -1   6 -18    5.81    0.88
  -1   6 -18    5.90    0.75
   1  -6  18    6.95    0.86
  -1   6 -18    5.23    0.85
  -1   6 -18    6.32    0.71
   1  -6  18    6.39    0.84
  -1   6 -18    5.01    0.76
   1  -6  19    1.14    0.44
  -1   6 -19    1.51    0.45
  -1   6 -19    1.52    0.58
  -1   6 -19    2.41    0.58
   1  -6  20   54.50    1.48
  -1   6 -20   53.55    1.57
  -1   6 -20   55.11    1.67
   1  -6  20   51.81    1.51
   1  -5 -23    3.02    0.42
  -1   5  23    3.39    0.37
  -1   5  23    2.78    0.36
  -1   5  22   90.41    2.23
  -1   5  22   89.13    2.20
  -1   5  21  124.90    3.01
  -1   5  21  120.57    3.01
  -1   5  21  127.68    2.98
  -1   5  21  123.10    2.66
  -1   5  20   27.21    1.26
  -1   5  20   26.60    1.44
  -1   5  20   28.70    1.48
   1  -5 -20   28.90    3.42
  -1   5  20   27.91    1.43
  -1   5  19    8.56    0.93
  -1   5  19    7.42    0.89
  -1   5  19    6.50    0.85
  -1   5  19    8.18    0.79
  -1   5  18  182.38    4.45
  -1   5  18  186.42    4.49
  -1   5  18  182.65    4.29
  -1   5  18  188.46    4.25
   1  -5 -18  176.90    8.94
   1  -5 -18  180.06    8.42
   1  -5 -17   60.13    4.87
  -1   5  17   62.95    2.45
   1  -5 -17   56.77    5.04
  -1   5  17   63.78    2.46
  -1   5  17   61.04    2.31
  -1   5  17   64.89    2.47
  -1   5  17   63.99    2.34
  -1   5  16   14.57    1.20
   1  -5 -16   13.61    2.37
  -1   5  16   11.83    1.11
  -1   5  16   11.95    1.02
  -1   5  16   10.95    1.01
  -1   5  16   11.71    1.10
   1  -5 -16   12.09    2.44
  -1   5  15   40.93    1.96
   1  -5 -15   43.20    3.93
  -1   5  15   42.43    1.96
  -1   5  15   44.12    2.12
  -1   5  15   46.07    2.04
   1  -5 -15   44.29    4.26
  -1   5  15   43.14    1.87
  -1   5  15   43.36    1.89
  -1   5  15   43.96    2.04
  -1   5  15   44.90    3.77
   1  -5 -14  258.83    9.54
  -1   5  14  264.95    9.43
  -1   5  14  261.85    5.21
  -1   5  14  264.58    5.46
  -1   5  14  242.83    5.50
  -1   5  14  242.00    5.46
   1  -5 -14  253.72   10.00
  -1   5  14  268.74    5.45
  -1   5  14  262.55    5.33
  -1   5  14  266.78    5.59
   1  -5 -13  652.21   14.92
   1  -5 -13  655.24   15.75
   1  -5 -13  626.14   16.22
  -1   5  13  687.16   15.91
  -1   5  12   15.78    2.15
   1  -5 -12   16.77    2.39
   1  -5 -12   16.47    1.90
   1  -5 -12   15.52    1.99
  -1   5  11   13.39    1.90
   1  -5 -11   10.92    1.75
   1  -5 -11    9.13    1.48
   1  -5 -11   11.82    1.93
   1  -5 -10  225.15    7.05
  -1   5  10  241.99    6.42
  -1   5  10  234.68    7.65
   1  -5 -10  217.43    7.48
  -1   5   9    5.84    1.37
  -1   5   9    9.29    1.60
   1  -5  -9    7.58    1.35
  -1   5   9    7.83    1.02
   1  -5  -8 1265.45   18.63
  -1   5   8 1227.07   21.90
  -1   5   8 1255.08   21.37
   1  -5  -8 1235.78   21.25
  -1   5   7    6.23    0.72
  -1   5   7    4.01    1.19
  -1   5   7    5.62    1.43
  -1   5   6    1.41    1.13
   1  -5  -6    3.56    0.62
  -1   5   6    1.61    0.45
  -1   5   6    1.94    1.09
   1  -5  -6    2.59    0.41
   1  -5  -5  137.26    3.73
  -1   5   5  137.89    4.91
  -1   5   5  132.76    2.99
  -1   5   5  138.02    4.76
  -1   5   4    3.98    0.99
  -1   5   4    5.35    0.54
  -1   5   4    4.58    1.01
   1  -5  -4    4.61    1.02
  -1   5   3 2388.07   32.62
  -1   5   3 2209.99   31.99
  -1   5   3 2328.05   29.14
   1  -5  -3 2254.09   31.95
   1  -5  -2    5.08    0.90
   1  -5  -2    5.63    0.97
   1  -5  -2    4.95    0.59
  -1   5   2    5.82    1.07
  -1   5   1   23.30    1.88
   1  -5  -1   21.24    1.96
   1  -5  -1   23.98    1.95
   1  -5  -1   21.87    1.75
  -1   5   0  468.99    9.56
   1  -5   0  471.57    6.83
   1  -5   0  487.30   10.22
  -1   5   0  456.19    6.60
   1  -5   0  488.94   10.47
  -1   5  -1  168.92    5.23
   1  -5   1  182.48    5.87
   1  -5   1  176.16    5.57
   1  -5   1  182.71    5.96
   1  -5   1  172.82    3.79
  -1   5  -1  169.43    4.87
   1  -5   2    6.09    1.26
   1  -5   2    8.03    1.45
   1  -5   2    5.33    0.73
  -1   5  -2    4.34    0.98
   1  -5   2    5.62    1.27
   1  -5   2    5.85    1.56
  -1   5  -2    5.51    1.16
   1  -5   3  590.25   10.72
  -1   5  -3  616.05   12.03
   1  -5   3  614.62   12.16
  -1   5  -4   10.89    1.70
   1  -5   4   11.27    2.09
   1  -5   4    8.83    1.40
   1  -5   4    9.31    1.28
  -1   5  -5    2.03    1.35
   1  -5   5    2.37    1.02
   1  -5   5    2.71    0.90
   1  -5   5    1.84    0.91
   1  -5   6  621.38   13.05
   1  -5   6  661.30   12.78
   1  -5   6  640.16   13.20
  -1   5  -6  648.92   14.20
   1  -5   7  114.63    4.40
  -1   5  -7   99.53    5.28
   1  -5   7  109.33    4.66
   1  -5   7  107.69    4.96
  -1   5  -7  109.16    4.32
   1  -5   8    2.71    1.09
  -1   5  -8    4.07    1.46
  -1   5  -8    3.49    0.78
   1  -5   9   42.71    3.63
  -1   5  -9   45.16    3.11
  -1   5  -9   47.75    4.10
   1  -5  10  347.69   10.33
  -1   5 -10  359.96    9.96
  -1   5 -10  352.49   12.10
   1  -5  10  345.06   11.25
  -1   5 -11  405.78    7.32
  -1   5 -11  397.43    7.13
   1  -5  11  389.08    7.10
   1  -5  11  402.76    7.47
  -1   5 -11  398.97    7.42
  -1   5 -11  382.04   10.93
  -1   5 -11  396.45   13.48
   1  -5  11  407.33    7.64
   1  -5  11  385.93   12.59
   1  -5  12   16.73    1.26
   1  -5  12   22.23    1.47
  -1   5 -12   17.92    1.26
   1  -5  12   17.04    1.26
  -1   5 -12   20.06    1.41
  -1   5 -12   17.36    1.35
   1  -5  12   18.52    1.43
   1  -5  12   20.81    1.46
  -1   5 -12   16.65    2.96
   1  -5  12   16.21    2.63
  -1   5 -13   67.54    2.70
  -1   5 -13   70.71    2.67
   1  -5  13   69.46    2.53
   1  -5  13   67.55    2.56
   1  -5  13   70.06    5.50
  -1   5 -13   61.99    5.46
   1  -5  13   70.09    2.81
   1  -5  13   70.43    2.69
  -1   5 -13   69.82    2.54
   1  -5  14  144.47    4.11
  -1   5 -14  144.20    3.97
   1  -5  14  142.95    4.17
  -1   5 -14  141.76    4.13
  -1   5 -14  146.96    3.88
   1  -5  14  144.90    3.94
   1  -5  14  139.72    3.75
   1  -5  15   66.12    2.71
  -1   5 -15   64.74    2.59
  -1   5 -15   65.47    2.76
   1  -5  15   62.34    2.60
  -1   5 -15   68.99    2.51
  -1   5 -15   62.41    2.71
   1  -5  15   66.25    2.56
  -1   5 -15   65.76    2.71
  -1   5 -16   13.14    1.22
  -1   5 -16   13.59    1.38
   1  -5  16   15.24    1.29
   1  -5  16   12.38    1.24
  -1   5 -16   13.78    1.09
  -1   5 -16   13.08    1.34
  -1   5 -16   13.62    1.34
  -1   5 -17   89.03    3.09
   1  -5  17   83.79    2.90
  -1   5 -17   84.89    2.94
   1  -5  17   88.17    2.82
  -1   5 -17   84.80    3.02
  -1   5 -17   82.74    2.75
  -1   5 -17   88.70    2.60
  -1   5 -18  161.32    4.12
   1  -5  18  159.46    3.91
   1  -5  18  160.96    3.74
  -1   5 -18  155.24    3.71
  -1   5 -18  153.74    3.89
  -1   5 -18  150.75    3.99
  -1   5 -19   30.68    1.49
  -1   5 -19   30.16    1.54
   1  -5  19   32.77    1.43
  -1   5 -19   30.91    1.59
  -1   5 -20    4.69    0.69
  -1   5 -20    4.28    0.59
  -1   5 -20    2.97    0.44
   1  -5  20    3.92    0.50
  -1   5 -20    4.51    0.62
  -1   5 -21   10.19    0.67
   1  -5  21    9.62    0.57
  -1   4  23   42.82    1.27
  -1   4  23   40.06    1.14
  -1   4  22    1.79    0.40
  -1   4  22    1.61    0.45
  -1   4  21    5.81    0.72
  -1   4  21    4.79    0.67
  -1   4  21    7.17    0.76
  -1   4  20   85.08    2.64
   1  -4 -20   83.25    5.75
  -1   4  20   90.30    2.74
  -1   4  20   90.35    2.41
  -1   4  20   91.45    2.69
  -1   4  19  134.14    3.59
  -1   4  19  137.24    3.33
  -1   4  19  132.59    3.62
   1  -4 -19  135.39    7.63
  -1   4  19  136.74    3.57
  -1   4  18    5.71    0.86
  -1   4  18    3.95    0.73
  -1   4  18    6.11    0.85
   1  -4 -18    3.88    1.69
   1  -4 -18    5.43    1.79
  -1   4  18    4.70    0.69
  -1   4  17   40.92    1.90
  -1   4  17   39.20    1.85
  -1   4  17   36.54    1.91
   1  -4 -17   37.58    4.17
   1  -4 -17   35.45    3.83
  -1   4  17   38.35    1.92
  -1   4  16  217.35    4.73
  -1   4  16  212.82    5.01
  -1   4  16  218.26    4.86
   1  -4 -16  217.85    9.39
  -1   4  16  225.89    8.88
   1  -4 -16  227.97    9.99
  -1   4  16  216.16    5.02
  -1   4  16  220.61    4.95
   1  -4 -15  175.70    8.15
  -1   4  15  188.52    4.50
   1  -4 -15  178.36    8.63
  -1   4  15  184.36    4.29
  -1   4  15  186.96    4.46
  -1   4  15  183.68    4.25
  -1   4  15  198.02    8.09
  -1   4  15  188.70    4.47
   1  -4 -14   50.27    4.33
   1  -4 -14   37.68    3.66
  -1   4  14   49.91    2.04
  -1   4  14   43.25    2.03
  -1   4  14   46.47    1.96
  -1   4  14   45.48    1.99
  -1   4  14   50.20    3.66
  -1   4  14   46.33    1.88
  -1   4  14   46.63    1.90
  -1   4  14   51.77    3.94
  -1   4  13  102.56    5.42
  -1   4  13  113.67    5.31
   1  -4 -13  102.53    5.95
   1  -4 -13   94.33    5.45
   1  -4 -13  112.65    5.23
  -1   4  12  163.80    6.16
   1  -4 -12  157.31    6.99
   1  -4 -12  162.03    6.41
  -1   4  12  155.41    6.46
   1  -4 -12  155.79    6.00
  -1   4  11   68.83    3.63
   1  -4 -11   60.36    3.68
  -1   4  11   65.94    3.92
   1  -4 -11   64.06    3.58
   1  -4 -11   64.55    4.21
   1  -4 -10  497.28   11.88
   1  -4 -10  508.54   11.40
  -1   4  10  496.91   11.70
  -1   4  10  530.71   10.96
  -1   4   9  531.38    9.06
   1  -4  -9  512.21   11.60
  -1   4   9  518.75   10.38
   1  -4  -9  540.95   10.20
   1  -4  -9  494.40   11.00
  -1   4   9  536.03   11.67
   1  -4  -8   16.23    1.77
  -1   4   8   17.23    1.13
  -1   4   8   14.39    1.86
  -1   4   8   14.89    1.79
  -1   4   8   15.76    1.43
   1  -4  -7    9.18    1.35
  -1   4   7   10.27    1.65
   1  -4  -7   11.28    1.04
  -1   4   7   10.18    0.82
  -1   4   7   11.09    1.07
  -1   4   7   10.15    1.50
  -1   4   6   76.21    2.47
   1  -4  -6   74.83    1.97
  -1   4   6   74.01    3.39
  -1   4   6   80.82    2.19
  -1   4   6   70.67    3.51
   1  -4  -6   77.30    2.51
   1  -4  -5  445.71    7.25
  -1   4   5  454.83    9.11
  -1   4   5  434.69    9.26
  -1   4   5  437.74    6.84
  -1   4   4  144.00    4.59
   1  -4  -4  135.28    2.49
  -1   4   4  139.96    2.90
  -1   4   3  564.93    8.02
  -1   4   3  571.93   10.45
  -1   4   3  541.20   10.15
   1  -4  -2  258.54    5.72
  -1   4   2  257.45    4.26
  -1   4   2  265.68    6.14
   1  -4  -1 2241.27   30.06
   1  -4  -1 2203.77   29.42
  -1   4   1 2205.42   30.33
  -1   4   0   56.91    2.29
   1  -4   0   60.35    1.55
  -1   4   0   52.89    2.49
   1  -4   0   57.41    2.73
  -1   4  -1  386.01    7.57
   1  -4   1  388.88    8.25
   1  -4   1  376.14    6.41
  -1   4  -1  384.21    7.96
   1  -4   2   17.23    1.68
   1  -4   2   17.82    1.19
   1  -4   2   17.39    1.76
  -1   4  -2   17.34    1.50
   1  -4   2   18.72    1.63
  -1   4  -3  641.91   11.85
   1  -4   3  634.02   10.86
   1  -4   3  672.72   13.07
   1  -4   3  648.48   11.82
  -1   4  -4  107.49    4.26
   1  -4   4  105.90    4.17
   1  -4   4  108.86    3.78
   1  -4   4  112.45    4.76
   1  -4   4  106.18    3.94
  -1   4  -5   41.59    2.91
   1  -4   5   46.64    2.63
   1  -4   5   39.66    2.55
  -1   4  -5   40.32    2.22
   1  -4   6  100.67    4.13
  -1   4  -6  101.83    3.88
   1  -4   6   99.01    3.85
   1  -4   6   99.39    4.27
  -1   4  -6  107.00    4.90
   1  -4   7   17.23    1.74
  -1   4  -7   19.34    2.48
  -1   4  -7   18.07    1.72
   1  -4   7   16.77    2.04
  -1   4  -8   80.71    3.91
  -1   4  -8   79.82    4.76
   1  -4   8   80.83    4.44
  -1   4  -9  209.96    8.30
   1  -4   9  219.73    8.06
  -1   4  -9  217.98    7.11
  -1   4 -10   87.58    5.58
  -1   4 -10   92.57    4.78
   1  -4  10  101.58    5.66
  -1   4 -11  114.76    5.66
   1  -4  11  127.11    6.72
  -1   4 -11  120.02    6.87
  -1   4 -12  147.61    6.76
  -1   4 -12  147.70    3.81
   1  -4  12  144.98    3.70
   1  -4  12  138.53    7.50
   1  -4  12  148.26    3.92
  -1   4 -12  144.09    7.97
   1  -4  12  144.81    3.99
   1  -4  12  151.80    4.03
  -1   4 -12  149.11    3.73
  -1   4 -12  150.78    3.96
  -1   4 -13  222.03    5.17
   1  -4  13  231.70    5.25
  -1   4 -13  224.04    8.78
  -1   4 -13  217.84   10.28
  -1   4 -13  224.35    4.92
   1  -4  13  225.91    4.97
   1  -4  13  232.84    5.34
   1  -4  13  209.80    4.58
  -1   4 -13  225.14    5.05
   1  -4  13  217.14    9.80
   1  -4  13  223.60    4.94
  -1   4 -14    4.01    0.77
  -1   4 -14    5.09    1.88
   1  -4  14    4.32    0.84
  -1   4 -14    5.92    1.66
   1  -4  14    3.72    1.60
   1  -4  14    4.16    0.79
   1  -4  14    4.09    0.82
  -1   4 -14    4.05    0.86
  -1   4 -14    4.60    0.73
   1  -4  14    4.32    0.67
  -1   4 -15   11.83    1.23
   1  -4  15   11.86    1.18
   1  -4  15   10.38    0.96
   1  -4  15   10.59    1.14
  -1   4 -15   10.81    1.04
  -1   4 -15    9.27    1.04
   1  -4  15   10.76    1.16
   1  -4  16  218.66    5.24
   1  -4  16  214.50    4.95
   1  -4  16  222.03    4.66
  -1   4 -16  218.21    5.39
  -1   4 -16  212.33    5.18
  -1   4 -16  209.26    4.94
  -1   4 -16  232.13    4.91
   1  -4  17   84.24    2.52
  -1   4 -17   75.89    2.83
   1  -4  17   84.26    2.77
  -1   4 -17   78.02    2.71
   1  -4  17   82.12    2.89
  -1   4 -17   83.05    3.10
  -1   4 -17   80.96    3.07
   1  -4  18   25.74    1.27
  -1   4 -18   26.75    1.61
   1  -4  18   28.17    1.52
  -1   4 -18   26.90    1.45
  -1   4 -18   25.28    1.70
   1  -4  18   24.99    1.53
  -1   4 -18   28.44    1.82
   1  -4  19  130.96    3.17
  -1   4 -19  129.07    3.36
  -1   4 -19  132.51    3.60
   1  -4  19  130.26    2.84
  -1   4 -19  127.56    3.58
  -1   4 -19  134.13    3.14
   1  -4  20   31.08    1.28
  -1   4 -20   29.62    1.50
  -1   4 -20   29.97    1.37
  -1   4 -20   31.24    1.52
  -1   4 -21    1.33    0.46
  -1   4 -21    1.01    0.45
   1  -4  21    0.67    0.32
   1  -4  21    1.23    0.28
  -1   4 -21    0.91    0.31
   1  -4  21    0.86    0.28
  -1   4 -21    0.42    0.31
  -1   3  23    2.78    0.41
  -1   3  23    1.92    0.27
  -1   3  22   55.21    1.74
  -1   3  22   55.40    1.63
  -1   3  22   55.06    1.74
  -1   3  21   38.22    1.62
  -1   3  21   37.06    1.55
  -1   3  21   39.40    1.62
  -1   3  21   38.09    1.52
  -1   3  20   12.58    1.07
  -1   3  20   12.56    1.07
  -1   3  20   11.21    0.99
   1  -3 -20   11.76    2.33
  -1   3  19  119.52    3.39
   1  -3 -19  119.70    7.17
  -1   3  19  127.24    3.13
  -1   3  19  121.73    3.37
  -1   3  19  116.49    3.33
   1  -3 -18   80.64    5.76
  -1   3  18   78.42    2.75
  -1   3  18   77.33    2.73
  -1   3  18   79.58    2.72
   1  -3 -18   75.45    5.81
   1  -3 -17  137.89    7.54
  -1   3  17  140.54    3.88
  -1   3  17  142.97    3.90
   1  -3 -17  146.83    8.11
  -1   3  17  144.24    3.83
  -1   3  16   67.50    2.47
   1  -3 -16   68.51    5.00
   1  -3 -16   68.99    5.40
  -1   3  16   67.21    2.54
   1  -3 -16   63.34    5.15
  -1   3  16   68.48    2.56
  -1   3  16   64.39    4.59
  -1   3  15    9.80    0.94
   1  -3 -15    9.03    2.13
   1  -3 -15    6.65    1.85
  -1   3  15    7.68    1.56
  -1   3  15   11.43    0.92
  -1   3  15   11.56    0.96
  -1   3  15   10.26    1.87
  -1   3  15    8.17    0.90
   1  -3 -14  332.99    9.99
   1  -3 -14  324.02   10.95
  -1   3  14  323.47   10.31
   1  -3 -14  330.26   11.50
  -1   3  14  335.44    6.20
  -1   3  14  325.44    6.09
  -1   3  14  342.34   10.52
  -1   3  14  329.52    6.34
   1  -3 -13  243.90    9.19
  -1   3  13  233.99    8.21
  -1   3  13  238.31    8.33
   1  -3 -13  235.74    7.95
   1  -3 -13  220.84    8.54
   1  -3 -12  135.12    6.38
   1  -3 -12  132.87    5.58
  -1   3  12  131.28    5.77
  -1   3  12  134.70    5.74
   1  -3 -11  116.46    5.17
  -1   3  11  115.64    5.01
   1  -3 -11  119.93    5.03
   1  -3 -11  115.99    5.60
  -1   3  11  126.51    5.38
  -1   3  11  119.81    4.26
   1  -3 -10  481.26   11.02
   1  -3 -10  499.11   10.34
  -1   3  10  478.62    9.47
  -1   3  10  500.46   11.26
   1  -3 -10  480.91   11.75
  -1   3  10  465.98   10.69
   1  -3  -9   67.23    3.65
   1  -3  -9   69.30    2.90
   1  -3  -9   67.55    3.45
  -1   3   9   67.08    2.76
  -1   3   9   65.57    3.50
  -1   3   9   68.88    3.37
   1  -3  -9   70.77    3.16
   1  -3  -8  159.33    5.43
   1  -3  -8  173.40    4.81
  -1   3   8  171.48    5.53
  -1   3   8  176.40    4.40
  -1   3   8  170.38    5.03
   1  -3  -8  165.27    5.23
  -1   3   7   77.28    2.96
   1  -3  -7   72.95    3.34
  -1   3   7   85.40    2.65
  -1   3   7   79.04    3.46
  -1   3   7   77.48    3.65
  -1   3   6    6.52    1.07
  -1   3   6    4.64    0.57
  -1   3   6    4.87    1.05
  -1   3   6    5.09    0.71
   1  -3  -6    3.09    0.65
   1  -3  -6    6.40    0.72
  -1   3   5   13.62    0.97
   1  -3  -5   16.79    0.76
  -1   3   5   12.89    1.41
  -1   3   5   12.78    0.83
  -1   3   5   15.13    1.37
   1  -3  -5   13.85    0.92
  -1   3   4   45.05    1.44
  -1   3   4   44.16    2.32
  -1   3   4   43.56    1.46
  -1   3   4   39.12    1.36
   1  -3  -3  150.75    2.58
  -1   3   3  152.20    2.73
  -1   3   3  151.62    4.25
  -1   3   2 1152.25   16.94
  -1   3   2 1187.93   14.92
  -1   3   2 1183.84   17.30
  -1   3   1 4999.75   65.31
  -1   3   1 4908.18   64.78
   1  -3  -1 5411.06   64.66
   1  -3  -1 5624.43   65.09
   1  -3   0  679.94   10.57
   1  -3   0  672.88    9.03
  -1   3   0  692.31   10.24
  -1   3   0  652.34   10.83
   1  -3   1  965.11   14.45
  -1   3  -1  938.61   13.76
   1  -3   2    2.78    0.77
  -1   3  -2    3.55    0.79
   1  -3   3  795.12   12.85
   1  -3   3  766.56   12.22
  -1   3  -3  780.18   13.10
  -1   3  -4  163.23    4.98
   1  -3   4  159.88    4.50
   1  -3   4  153.03    4.45
   1  -3   5  187.54    5.08
   1  -3   5  186.04    5.39
  -1   3  -5  197.33    5.95
  -1   3  -6   45.50    2.50
   1  -3   6   40.81    2.39
  -1   3  -6   43.35    3.10
   1  -3   6   45.54    2.31
   1  -3   6   41.31    2.68
  -1   3  -7   14.07    1.57
   1  -3   7   13.51    1.39
   1  -3   7   15.15    1.92
  -1   3  -7   17.87    2.33
  -1   3  -8   26.48    2.70
  -1   3  -8   27.70    2.31
   1  -3   8   28.86    2.66
   1  -3   8   29.40    2.01
  -1   3  -9  244.18    8.70
   1  -3   9  245.69    8.33
  -1   3  -9  258.75    7.74
   1  -3  10  245.97    8.87
  -1   3 -10  254.33    9.32
  -1   3 -10  253.78    8.10
  -1   3 -11   37.83    3.74
   1  -3  11   34.44    3.53
  -1   3 -11   34.98    3.04
   1  -3  12   34.07    3.63
  -1   3 -12   31.87    3.69
  -1   3 -12   32.03    3.06
  -1   3 -13  213.86    9.99
   1  -3  13  225.96    9.82
  -1   3 -13  221.73    4.91
   1  -3  13  217.86    4.63
  -1   3 -13  216.87    8.73
  -1   3 -13  226.53    4.87
   1  -3  13  231.44    5.16
   1  -3  13  216.95    4.81
   1  -3  13  223.55    5.16
  -1   3 -13  231.96    5.14
  -1   3 -14   64.65    2.55
   1  -3  14   62.02    2.27
   1  -3  14   64.68    2.60
  -1   3 -14   65.00    2.43
  -1   3 -14   66.01    5.65
   1  -3  14   67.00    2.64
   1  -3  14   67.46    2.45
   1  -3  14   67.70    5.46
  -1   3 -14   65.19    4.84
  -1   3 -14   67.55    2.45
  -1   3 -15   78.30    5.46
   1  -3  15   82.43    2.65
   1  -3  15   81.81    3.00
  -1   3 -15   86.47    2.79
  -1   3 -15   80.17    2.80
  -1   3 -15   81.08    2.95
   1  -3  15   81.35    3.03
   1  -3  15   80.45    2.77
  -1   3 -16    4.88    0.81
   1  -3  16    2.84    0.85
  -1   3 -16    3.47    1.37
  -1   3 -16    2.76    0.82
   1  -3  16    2.46    0.69
   1  -3  16    2.59    0.64
  -1   3 -17  213.43    4.82
  -1   3 -17  230.48    5.43
   1  -3  17  214.71    4.65
  -1   3 -17  213.39    5.09
   1  -3  17  219.15    5.12
   1  -3  17  215.42    4.82
   1  -3  18   57.81    2.34
   1  -3  18   58.06    2.19
  -1   3 -18   57.61    2.55
   1  -3  18   58.29    2.07
  -1   3 -18   58.57    2.16
  -1   3 -18   56.78    2.32
  -1   3 -19   67.18    2.62
   1  -3  19   66.79    2.20
   1  -3  19   66.28    2.08
  -1   3 -19   67.29    2.14
  -1   3 -19   70.57    2.62
  -1   3 -19   63.85    2.32
   1  -3  20   32.21    1.25
  -1   3 -20   35.56    1.69
  -1   3 -20   32.93    1.70
   1  -3  20   32.08    1.34
  -1   3 -20   31.24    1.45
   1  -3  21   50.23    1.34
   1  -3  21   52.35    1.69
  -1   3 -21   51.79    1.87
  -1   3 -21   51.42    1.59
   1  -3  21   50.28    1.48
   1  -3  21   52.22    1.47
  -1   3 -21   54.92    1.85
  -1   3 -22    5.49    0.53
   1  -3  22    6.64    0.48
  -1   3 -22    7.41    0.59
   1  -2 -23    2.73    0.50
  -1   2  23    3.02    0.40
  -1   2  22    1.38    0.43
  -1   2  22    1.32    0.31
   1  -2 -22    1.50    0.41
  -1   2  22    1.19    0.37
  -1   2  21   21.51    1.22
  -1   2  21   21.13    1.16
  -1   2  21   22.02    1.26
  -1   2  21   20.66    1.10
  -1   2  20   97.19    2.83
   1  -2 -20   91.81    2.67
  -1   2  20   89.26    2.72
  -1   2  20   93.62    2.82
   1  -2 -20   87.91    5.83
  -1   2  19   41.28    1.91
  -1   2  19   38.72    1.88
  -1   2  19   40.07    1.86
   1  -2 -19   39.45    4.12
  -1   2  19   41.64    1.64
   1  -2 -18    1.40    1.38
  -1   2  18    0.81    0.75
  -1   2  18    1.50    0.57
   1  -2 -18    2.00    1.34
  -1   2  18    1.45    0.65
  -1   2  17   75.26    2.71
   1  -2 -17   74.82    5.78
  -1   2  17   74.40    2.65
   1  -2 -17   76.71    5.67
  -1   2  16   23.67    1.36
   1  -2 -16   24.13    2.98
   1  -2 -16   21.36    3.17
  -1   2  16   22.53    1.46
  -1   2  16   24.44    1.48
  -1   2  16   26.61    2.91
  -1   2  15    0.34    0.56
  -1   2  15    1.73    0.51
  -1   2  15    0.62    0.42
  -1   2  15    1.07    0.45
   1  -2 -15    0.82    0.95
   1  -2 -15    0.08    1.63
   1  -2 -15    1.02    1.30
   1  -2 -14   82.45    4.77
   1  -2 -14   79.10    5.42
  -1   2  14   78.93    4.99
  -1   2  14   87.19    5.02
   1  -2 -14   74.61    5.18
   1  -2 -13  116.16    6.27
  -1   2  13  124.32    5.14
  -1   2  13  116.88    5.61
   1  -2 -13  117.26    5.56
   1  -2 -13  113.17    6.04
  -1   2  13  110.59    5.73
   1  -2 -12   40.80    3.48
  -1   2  12   51.89    3.51
  -1   2  12   47.10    2.97
   1  -2 -12   43.32    3.71
  -1   2  12   43.29    3.31
   1  -2 -12   44.93    3.22
  -1   2  11  165.80    5.51
  -1   2  11  159.58    6.20
   1  -2 -11  178.65    6.09
  -1   2  11  173.81    6.26
   1  -2 -11  172.81    6.20
   1  -2 -11  174.02    6.89
   1  -2 -11  176.70    6.47
   1  -2 -10   98.73    4.16
   1  -2 -10   97.35    4.46
   1  -2 -10  100.29    4.88
  -1   2  10   97.71    4.43
   1  -2 -10   99.62    4.39
  -1   2  10   95.06    3.83
   1  -2  -9  287.87    7.09
  -1   2   9  282.31    6.71
   1  -2  -9  271.04    7.43
  -1   2   9  287.56    7.55
   1  -2  -9  268.23    6.72
  -1   2   8  319.00    7.51
   1  -2  -8  307.79    7.03
   1  -2  -8  308.17    7.82
  -1   2   8  321.86    6.85
   1  -2  -8  305.70    7.55
   1  -2  -8  313.97    6.39
  -1   2   7 1106.68   16.44
   1  -2  -7 1105.39   16.52
  -1   2   7 1141.19   17.40
   1  -2  -7 1151.40   16.85
   1  -2  -7 1092.23   17.58
   1  -2  -7 1119.38   17.99
   1  -2  -6   37.06    1.78
  -1   2   6   38.14    1.97
  -1   2   6   36.86    1.71
   1  -2  -6   39.69    2.23
  -1   2   6   35.71    2.22
  -1   2   5  424.55    7.05
   1  -2  -5  435.33    8.24
  -1   2   5  429.43    7.50
  -1   2   5  415.75    8.31
  -1   2   4  501.49    7.67
  -1   2   4  510.69    6.99
  -1   2   4  512.54    7.96
  -1   2   4  491.83    9.00
   1  -2  -4  498.77    7.40
  -1   2   3  740.74   10.41
  -1   2   3  774.33   10.42
  -1   2   3  722.83   11.72
  -1   2   3  769.43   10.29
   1  -2  -2 2156.78   26.15
  -1   2   2 2126.68   25.88
  -1   2   2 2187.60   28.10
  -1   2   2 2140.55   27.02
  -1   2   2 2096.55   27.79
  -1   2   1  186.20    3.95
  -1   2   1  179.47    3.59
   1  -2   0  167.97    3.93
  -1   2   0  165.70    3.67
  -1   2   0  157.27    3.54
  -1   2   0  168.26    3.26
  -1   2   0  163.79    3.25
  -1   2  -1 1172.87   15.77
   1  -2   1 1157.04   16.29
   1  -2   2    4.08    0.73
  -1   2  -2    3.69    0.66
  -1   2  -2    4.28    0.79
   1  -2   2    3.83    0.54
  -1   2  -3   50.84    2.32
   1  -2   3   47.41    2.02
   1  -2   4    4.26    0.75
  -1   2  -4    6.12    1.00
   1  -2   4    5.35    0.80
   1  -2   5   12.71    1.35
  -1   2  -5   12.28    1.45
   1  -2   5   14.55    1.18
   1  -2   6  564.88   11.38
  -1   2  -6  624.03   11.16
  -1   2  -6  585.34   11.99
  -1   2  -6  616.60   11.44
  -1   2  -7  306.60    7.83
  -1   2  -7  309.34    8.42
   1  -2   7  292.76    7.92
  -1   2  -7  317.88    7.62
   1  -2   8   17.95    2.21
  -1   2  -8   15.18    1.86
  -1   2  -8   15.75    2.25
  -1   2  -8   16.34    1.83
   1  -2   8   16.43    1.47
  -1   2  -9   39.85    2.85
  -1   2  -9   38.85    3.01
  -1   2  -9   39.47    3.38
   1  -2   9   39.72    3.22
  -1   2 -10    1.01    0.98
   1  -2  10    0.82    1.10
  -1   2 -10    0.60    1.26
  -1   2 -11  257.74    8.63
  -1   2 -11  257.48    9.60
   1  -2  11  256.96    9.28
  -1   2 -12  391.97   11.56
   1  -2  12  396.29   12.56
  -1   2 -12  408.16   13.07
   1  -2  13    1.52    1.19
   1  -2  13    2.46    0.57
  -1   2 -13    0.17    1.24
  -1   2 -13    1.92    1.59
   1  -2  13    3.86    0.62
   1  -2  13    4.35    0.74
   1  -2  14   20.07    1.44
  -1   2 -14   18.33    1.34
  -1   2 -14   13.55    2.56
  -1   2 -14   16.68    1.22
   1  -2  14   20.10    1.27
   1  -2  14   18.77    1.25
   1  -2  14   16.78    2.77
  -1   2 -14   14.42    2.39
   1  -2  14   18.32    1.38
   1  -2  15  304.15    6.34
   1  -2  15  294.00    5.86
   1  -2  15  283.51    5.86
  -1   2 -15  301.69    5.98
  -1   2 -15  285.37   12.01
   1  -2  15  302.98   11.99
  -1   2 -15  278.08   10.79
  -1   2 -15  303.93    6.28
  -1   2 -16   63.44    2.38
  -1   2 -16   60.89    4.97
   1  -2  16   60.97    2.32
   1  -2  16   61.04    2.56
   1  -2  16   61.87    2.37
  -1   2 -16   61.89    2.55
  -1   2 -17   -0.33    1.16
  -1   2 -17    1.97    0.61
   1  -2  17    1.31    0.67
  -1   2 -17    1.18    0.65
   1  -2  17    1.11    0.58
   1  -2  17    2.14    0.63
  -1   2 -18   36.87    1.67
   1  -2  18   33.43    1.64
  -1   2 -18   35.60    1.88
   1  -2  18   34.70    1.69
  -1   2 -18   36.94    2.05
  -1   2 -19  265.31    5.46
   1  -2  19  261.76    5.15
   1  -2  19  267.73    5.20
  -1   2 -20   44.79    2.08
   1  -2  20   41.15    1.55
  -1   2 -20   42.00    1.92
  -1   2 -20   39.03    1.67
   1  -2  20   40.31    1.56
   1  -2  21    1.19    0.46
  -1   2 -21    1.78    0.71
   1  -2  21    1.22    0.36
  -1   2 -21    1.03    0.53
   1  -2  21    1.40    0.36
   1  -2  21    1.16    0.33
  -1   2 -21    1.28    0.40
   1  -2  22   28.72    0.90
   1  -2  22   29.45    0.94
  -1   2 -22   31.99    1.30
   1  -2  22   31.76    1.16
  -1   2 -22   32.61    1.27
  -1   2 -22   32.50    1.35
  -1   1  23  105.99    2.16
  -1   1  23  111.79    2.26
   1  -1 -23  108.75    2.55
  -1   1  22    5.18    0.58
  -1   1  22    4.80    0.57
  -1   1  22    4.10    0.47
   1  -1 -22    4.94    0.59
  -1   1  22    4.49    0.42
  -1   1  21    0.21    0.53
  -1   1  21   -0.73    0.55
   1  -1 -21    0.04    0.38
  -1   1  21    0.68    0.54
  -1   1  21   -0.49    0.40
   1  -1 -20   25.84    3.25
  -1   1  20   23.50    1.40
  -1   1  20   21.89    1.33
   1  -1 -20   21.61    1.28
  -1   1  20   21.29    1.29
   1  -1 -19   54.37    4.74
  -1   1  19   53.27    2.16
  -1   1  19   56.55    2.24
  -1   1  19   52.41    2.16
  -1   1  18    6.07    0.86
   1  -1 -18    4.66    1.66
  -1   1  18    8.87    1.01
  -1   1  17    0.37    0.43
  -1   1  17    0.40    0.65
   1  -1 -17    1.59    1.64
  -1   1  17    0.60    0.56
   1  -1 -17   -0.39    1.69
  -1   1  16    0.06    0.97
   1  -1 -16    0.92    1.39
  -1   1  16    1.24    0.53
  -1   1  16    1.75    0.43
  -1   1  15   19.23    2.41
  -1   1  15   17.12    1.14
   1  -1 -15   17.56    2.78
  -1   1  15   15.80    2.35
  -1   1  15   16.34    1.16
   1  -1 -15   15.22    2.83
   1  -1 -15   18.12    2.40
  -1   1  14    3.32    1.02
   1  -1 -14    6.08    1.87
  -1   1  14    4.28    0.73
  -1   1  14    3.38    0.56
   1  -1 -14    4.07    1.39
   1  -1 -14    4.32    1.68
  -1   1  14    3.58    1.10
   1  -1 -13   10.04    2.14
  -1   1  13    7.32    1.31
  -1   1  13    7.54    1.82
  -1   1  13    5.09    1.20
   1  -1 -13    8.31    2.01
   1  -1 -13    7.43    1.48
   1  -1 -12  147.71    6.10
  -1   1  12  151.18    5.79
   1  -1 -12  152.54    6.83
   1  -1 -12  150.75    6.13
   1  -1 -12  147.50    6.61
  -1   1  12  148.25    6.43
   1  -1 -11  555.29   12.59
  -1   1  11  560.54   13.13
   1  -1 -11  573.14   12.61
   1  -1 -11  548.67   13.42
  -1   1  11  545.54   11.89
   1  -1 -11  572.12   13.39
  -1   1  10  212.31    7.06
  -1   1  10  221.24    6.46
   1  -1 -10  218.59    6.13
   1  -1 -10  219.80    7.39
   1  -1 -10  221.81    6.76
   1  -1 -10  221.67    6.92
   1  -1  -9 1211.99   19.94
   1  -1  -9 1176.56   18.67
  -1   1   9 1225.87   20.20
   1  -1  -9 1190.57   19.43
   1  -1  -9 1167.61   19.74
   1  -1  -9 1201.94   20.55
  -1   1   9 1164.36   18.97
   1  -1  -8 1502.13   22.89
  -1   1   8 1537.77   23.52
   1  -1  -8 1531.92   23.42
  -1   1   8 1486.30   22.55
   1  -1  -8 1574.24   23.41
   1  -1  -8 1578.38   22.54
  -1   1   7  514.88    9.95
  -1   1   7  528.79    9.49
   1  -1  -7  517.48    9.53
   1  -1  -7  515.05    9.99
   1  -1  -7  490.85    8.45
   1  -1  -6 2802.98   37.32
  -1   1   6 2678.08   36.26
   1  -1  -6 2860.57   35.75
   1  -1  -6 2836.18   37.23
  -1   1   6 2744.69   36.99
   1  -1  -6 2781.86   36.35
   1  -1  -5 7552.74   95.87
  -1   1   5 7662.49   96.06
  -1   1   4   14.05    1.02
  -1   1   4   11.70    1.07
   1  -1  -4   13.84    0.84
  -1   1   3   89.34    2.20
  -1   1   3   84.15    2.24
  -1   1   3   82.79    2.52
   1  -1  -3   87.89    1.85
  -1   1   3   85.43    1.76
  -1   1   2  560.09    8.55
  -1   1   2  564.11    7.93
  -1   1   2  567.06    7.81
  -1   1   1  494.94    7.37
  -1   1   1  509.73    7.13
  -1   1   1  485.13    6.99
   1  -1  -1  484.50    6.53
  -1   1   0  249.41    4.35
   1  -1   0  269.16    3.64
  -1   1   0  242.70    4.23
  -1   1   0  235.80    3.90
  -1   1   0  265.77    3.94
  -1   1  -1   17.19    0.88
  -1   1  -1   15.41    0.89
   1  -1   1   15.97    0.96
  -1   1  -2  649.82    9.75
   1  -1   2  645.84    9.70
  -1   1  -2  621.14    9.48
  -1   1  -3   32.29    1.47
   1  -1   3   31.80    1.58
   1  -1   3   32.95    1.51
  -1   1  -3   34.02    1.75
   1  -1   4  563.94    9.81
  -1   1  -4  590.17   10.24
   1  -1   5    2.24    0.67
  -1   1  -5    1.71    0.73
  -1   1  -6 1094.33   17.83
   1  -1   6 1054.01   17.29
  -1   1  -6 1092.20   17.20
  -1   1  -7   13.19    1.50
   1  -1   7   12.04    1.60
  -1   1  -7   11.54    1.66
   1  -1   8   30.95    2.66
  -1   1  -8   33.19    2.83
  -1   1  -8   35.89    2.58
  -1   1  -9  306.52    8.45
   1  -1   9  306.60    8.90
  -1   1  -9  318.16    9.38
  -1   1  -9  323.56    8.75
  -1   1 -10  206.61    7.17
  -1   1 -10  213.85    7.36
  -1   1 -10  212.20    7.91
   1  -1  10  209.71    7.57
  -1   1 -11   77.09    5.03
  -1   1 -11   78.53    4.63
  -1   1 -11   76.81    4.44
   1  -1  11   74.36    4.69
  -1   1 -12   59.75    4.32
  -1   1 -12   57.29    4.58
  -1   1 -12   56.56    4.09
   1  -1  12   55.81    4.45
   1  -1  13  407.99   12.95
  -1   1 -13  395.84   13.14
  -1   1 -13  407.29   12.24
   1  -1  14   50.18    2.04
   1  -1  14   55.03    4.81
   1  -1  14   60.57    2.43
   1  -1  14   55.27    2.30
  -1   1 -14   53.76    4.81
   1  -1  14   56.00    2.12
  -1   1 -14   50.94    4.37
   1  -1  15    4.14    1.57
  -1   1 -15    2.52    0.58
  -1   1 -15    2.27    1.75
   1  -1  15    2.05    0.61
  -1   1 -15    2.12    0.68
   1  -1  15    3.16    0.77
   1  -1  15    2.44    0.62
   1  -1  16  336.11    6.83
  -1   1 -16  325.91    6.68
  -1   1 -16  346.90    6.45
   1  -1  16  330.24    6.39
   1  -1  16  339.88    6.49
  -1   1 -16  322.24   11.97
  -1   1 -17  326.25   12.15
   1  -1  17  343.14    6.92
   1  -1  17  352.70    6.63
   1  -1  17  341.54    6.48
  -1   1 -17  336.19    6.78
  -1   1 -18   77.97    2.76
  -1   1 -18   76.77    5.61
   1  -1  18   83.97    2.63
   1  -1  18   81.65    2.68
   1  -1  19    3.40    0.71
   1  -1  19    3.06    0.59
  -1   1 -19    4.47    0.98
  -1   1 -19    4.05    0.74
   1  -1  20   79.17    2.23
   1  -1  20   75.48    2.34
  -1   1 -20   81.75    2.47
   1  -1  20   78.89    2.57
   1  -1  20   80.47    2.39
  -1   1 -20   80.08    2.70
  -1   1 -21  162.94    3.92
   1  -1  21  153.81    2.98
  -1   1 -21  157.35    3.28
   1  -1  21  148.18    3.21
   1  -1  21  157.49    3.51
   1  -1  21  153.73    3.25
  -1   1 -21  154.52    3.65
   1  -1  22    3.66    0.41
   1  -1  22    4.55    0.54
  -1   1 -22    4.20    0.69
   1  -1  22    4.16    0.41
  -1   1 -22    3.65    0.57
   1  -1  22    3.70    0.43
  -1   1 -23   16.02    0.81
  -1   1 -23   14.38    0.78
   1   0 -23    5.42    0.57
  -1   0  23    5.44    0.42
  -1   0  23    5.76    0.45
  -1   0  22   78.86    1.94
  -1   0  22   82.42    2.10
   1   0 -22   80.05    2.20
   1   0 -22   75.80    1.88
  -1   0  22   84.48    2.10
  -1   0  21  142.38    3.28
  -1   0  21  143.29    2.91
   1   0 -21  137.09    3.17
  -1   0  21  135.74    3.15
   1   0 -21  137.78    3.43
   1   0 -20   83.04    2.59
  -1   0  20   87.04    2.64
  -1   0  20   81.42    2.55
  -1   0  20   83.55    2.62
  -1   0  19    3.14    0.64
  -1   0  19    5.90    0.90
   1   0 -19    3.95    0.75
   1   0 -19    2.71    1.25
  -1   0  18   26.18    1.59
   1   0 -18   24.14    3.31
  -1   0  18   22.38    1.46
   1   0 -17  399.52   13.71
   1   0 -17  396.19   13.69
  -1   0  17  410.95    7.55
   1   0 -16   17.66    2.75
  -1   0  16   16.53    2.64
  -1   0  16   18.55    1.18
   1   0 -16   15.19    2.77
   1   0 -16   16.20    2.84
  -1   0  16   18.53    1.32
  -1   0  15    7.74    0.85
  -1   0  15    7.17    1.65
   1   0 -15    5.90    1.92
  -1   0  15    8.78    1.61
  -1   0  15    8.53    0.88
  -1   0  15   10.79    0.89
  -1   0  15   10.71    1.79
   1   0 -14   72.36    5.20
   1   0 -14   74.95    4.78
  -1   0  14   74.25    2.48
  -1   0  14   73.12    5.12
  -1   0  14   68.31    4.37
  -1   0  14   68.48    4.38
   1   0 -14   68.25    5.05
   1   0 -13  421.19   11.88
  -1   0  13  430.49   12.57
  -1   0  13  403.61   11.12
   1   0 -13  404.72   12.42
   1   0 -13  412.68   11.60
   1   0 -13  428.97   12.62
  -1   0  12   -0.91    0.99
   1   0 -12   -0.09    0.95
   1   0 -12   -0.01    1.05
  -1   0  12   -0.40    0.86
   1   0 -12   -0.68    1.21
   1   0 -11  303.27    8.88
   1   0 -11  321.90    9.61
   1   0 -11  313.68    9.11
   1   0 -11  304.40    9.42
  -1   0  11  325.62    9.63
  -1   0  11  294.32    8.46
   1   0 -10  151.70    5.75
   1   0 -10  154.89    6.12
  -1   0  10  144.11    5.36
  -1   0  10  157.56    6.09
   1   0 -10  147.38    5.65
   1   0 -10  155.35    6.11
   1   0  -9 1377.83   22.15
   1   0  -9 1343.65   21.97
  -1   0   9 1311.02   22.33
   1   0  -9 1395.57   22.70
   1   0  -8 3429.19   48.03
   1   0  -8 3749.72   48.63
   1   0  -8 3708.86   48.76
   1   0  -8 3679.59   47.48
  -1   0   8 3511.34   48.72
   1   0  -8 3519.02   48.81
  -1   0   7  305.33    7.30
   1   0  -7  302.14    7.16
   1   0  -7  310.02    7.17
   1   0  -7  286.34    6.83
   1   0  -6   57.35    2.64
   1   0  -6   58.84    2.54
  -1   0   6   60.56    2.78
   1   0  -5 1575.72   21.96
   1   0  -5 1554.33   21.40
  -1   0   5 1543.82   21.96
   1   0  -4 3064.91   38.17
  -1   0   4 3014.91   39.09
   1   0  -4 3067.38   38.46
  -1   0   3 2934.95   37.12
  -1   0   3 2938.03   36.87
   1   0  -3 2946.83   36.45
  -1   0   2  279.68    4.73
   1   0  -2  296.18    4.28
  -1   0   2  294.26    4.83
  -1   0   2  286.66    4.03
   1   0  -2  299.50    4.24
  -1   0   2  275.04    4.74
  -1   0   1  329.11    4.72
  -1   0   1  333.55    4.90
   1   0  -1  339.89    4.97
   1   0  -1  344.56    4.92
  -1   0   1  337.73    5.02
  -1   0   0  633.34    8.51
  -1   0   0  640.52    8.46
   1   0   0  623.37    8.11
   1   0   0  633.82    8.35
  -1   0   0  630.28    8.11
  -1   0  -1 2223.68   29.01
   1   0   1 2302.92   28.86
   1   0   2    9.26    0.65
  -1   0  -2    9.51    0.62
  -1   0  -2    9.63    0.71
   1   0   3  816.90   11.86
  -1   0  -3  812.44   11.30
  -1   0  -4 1755.74   22.10
   1   0   4 1619.58   23.00
  -1   0  -5    5.13    0.95
   1   0   5    4.79    0.86
   1   0   6   51.39    2.60
  -1   0  -6   53.30    2.83
  -1   0  -6   55.19    2.57
  -1   0  -6   53.57    2.58
  -1   0  -7   19.22    1.96
  -1   0  -7   18.85    1.50
   1   0   7   18.49    1.81
  -1   0  -7   18.02    1.68
  -1   0  -8   33.57    2.15
  -1   0  -8   28.61    2.33
   1   0   8   27.60    2.38
  -1   0  -8   31.86    2.67
  -1   0  -8   32.45    2.40
  -1   0  -9  739.89   14.34
  -1   0  -9  723.89   15.05
   1   0  10  323.92    9.39
  -1   0 -10  330.57    9.27
  -1   0 -10  329.62    9.91
   1   0  11  108.99    5.52
  -1   0 -11  106.27    5.28
  -1   0 -11  110.46    5.79
  -1   0 -11  110.54    5.35
  -1   0 -12  355.74   10.72
  -1   0 -12  356.07   10.66
  -1   0 -12  354.89   11.47
   1   0  12  344.44   10.90
   1   0  13   13.87    2.33
  -1   0 -13   11.70    2.28
  -1   0 -13   14.62    2.34
  -1   0 -13   10.89    2.23
   1   0  14   50.93    2.15
   1   0  14   52.58    4.54
  -1   0 -14   50.78    4.61
   1   0  14   53.35    2.04
  -1   0 -14   43.15    4.01
   1   0  14   50.08    1.94
  -1   0 -15  907.45   22.66
   1   0  15  994.80   14.69
   1   0  15  971.35   14.24
   1   0  15  960.16   22.61
   1   0  15  939.75   13.96
  -1   0 -15  944.37   21.98
  -1   0 -16   24.52    3.35
   1   0  16   29.62    1.64
   1   0  16   30.11    1.54
  -1   0 -16   27.10    3.57
  -1   0 -16   29.75    1.71
   1   0  16   25.48    3.31
   1   0  16   29.66    1.74
  -1   0 -17   23.22    3.28
   1   0  17   24.32    1.52
  -1   0 -17   23.50    1.51
   1   0  17   22.92    1.36
  -1   0 -18  173.94    4.27
   1   0  18  168.47    3.93
   1   0  18  169.57    4.16
  -1   0 -18  166.23    8.51
   1   0  19  203.42    4.24
  -1   0 -19  209.44    4.62
  -1   0 -19  207.62    4.93
   1   0  19  204.43    4.57
  -1   0 -20    3.20    0.77
  -1   0 -20    3.19    0.59
   1   0  20    2.62    0.56
   1   0  20    3.53    0.70
   1   0  20    3.07    0.73
   1   0  20    2.35    0.46
   1   0  21   20.78    1.14
  -1   0 -21   20.18    1.43
  -1   0 -21   19.66    1.25
  -1   0 -21   21.01    1.06
   1   0  21   19.37    1.07
   1   0  21   19.75    1.20
   1   0  22   43.17    1.32
  -1   0 -22   42.47    1.55
   1   0  22   44.47    1.53
  -1   0 -22   44.49    1.76
   1   0  22   44.53    1.43
  -1   0 -23   30.70    1.24
  -1   0 -23   31.69    1.26
   1   0  23   30.17    1.03
   1   0  23   29.83    0.95
   1   1 -23   46.89    1.40
   1   1 -22   11.75    0.69
  -1  -1  22   11.99    0.75
  -1  -1  22   11.07    0.65
   1   1 -22   12.15    0.94
   1   1 -22   12.38    0.86
  -1  -1  22   12.83    0.77
  -1  -1  21   28.86    1.27
   1   1 -21   29.89    1.50
  -1  -1  21   30.31    1.37
  -1  -1  21   33.73    1.41
   1   1 -21   29.30    1.35
  -1  -1  20  140.40    3.38
   1   1 -20  130.60    3.40
  -1  -1  20  134.38    3.38
  -1  -1  20  133.14    3.32
  -1  -1  19  138.38    3.61
   1   1 -19  139.71    7.35
  -1  -1  19  145.97    3.67
   1   1 -19  142.06    3.77
   1   1 -18   52.18    4.62
  -1  -1  18   54.60    1.94
   1   1 -18   54.40    2.07
   1   1 -18   50.33    2.25
  -1  -1  18   55.43    2.25
  -1  -1  17   65.39    2.24
  -1  -1  17   65.66    2.49
   1   1 -17   67.60    2.41
   1   1 -16  122.55    7.25
   1   1 -16  116.32    6.97
   1   1 -16  121.60    3.41
  -1  -1  16  123.51    3.49
  -1  -1  16  122.90    3.23
   1   1 -15    8.65    2.23
  -1  -1  15    8.62    0.83
   1   1 -15    9.49    2.17
   1   1 -15    7.45    0.81
  -1  -1  15    5.48    1.37
  -1  -1  15    6.99    1.70
  -1  -1  15    9.39    0.96
  -1  -1  15    8.60    0.95
  -1  -1  14   36.50    3.70
   1   1 -14   37.26    3.83
   1   1 -14   35.93    3.50
  -1  -1  14   40.29    1.97
  -1  -1  14   38.83    1.81
  -1  -1  14   35.26    1.61
  -1  -1  14   39.28    1.79
  -1  -1  14   37.47    3.37
  -1  -1  13   11.70    1.85
   1   1 -13   11.89    1.96
   1   1 -13   11.15    2.35
   1   1 -13   11.74    1.99
  -1  -1  13   16.06    2.51
   1   1 -13   12.15    2.17
  -1  -1  12   26.14    3.00
   1   1 -12   27.08    2.79
   1   1 -12   29.19    3.09
  -1  -1  12   26.39    2.64
   1   1 -12   26.22    2.72
   1   1 -12   26.62    2.85
   1   1 -11  167.74    6.52
   1   1 -11  161.81    6.58
   1   1 -11  164.61    6.76
  -1  -1  11  168.80    6.94
   1   1 -11  157.83    6.61
   1   1 -10    4.91    1.32
   1   1 -10    2.79    1.27
  -1  -1  10    2.11    1.28
   1   1  -9   46.11    3.12
   1   1  -9   49.13    3.16
   1   1  -9   44.58    2.96
   1   1  -9   43.76    2.99
  -1  -1   9   48.21    3.33
   1   1  -8    4.64    1.12
   1   1  -8    3.36    1.11
  -1  -1   8    4.57    1.30
   1   1  -8    4.79    1.28
  -1  -1   8    4.75    0.52
   1   1  -7   -0.20    0.84
   1   1  -7    0.91    0.69
   1   1  -7    0.82    0.73
  -1  -1   7    2.73    1.08
  -1  -1   7    1.03    0.33
   1   1  -6  667.41   11.85
   1   1  -6  684.00   11.80
  -1  -1   6  652.01   11.92
  -1  -1   6  677.64    9.67
  -1  -1   5  640.71   11.01
  -1  -1   5  638.42    9.15
   1   1  -4  658.94   10.46
  -1  -1   4  677.71    9.40
   1   1  -3 3285.23   41.10
  -1  -1   3 3351.63   40.29
   1   1  -2 2781.42   34.72
  -1  -1   2 2840.01   35.11
  -1  -1   2 2770.75   34.35
  -1  -1   1 1002.88   13.33
   1   1  -1  985.79   13.38
   1   1  -1 1008.02   13.24
  -1  -1   0  202.05    2.87
  -1  -1   0  200.16    3.28
   1   1   0  190.83    3.24
  -1  -1   0  195.77    3.17
  -1  -1  -1 1055.06   12.89
   1   1   1 1003.42   12.30
   1   1   1  980.19   12.95
   1   1   1  929.93   13.01
   1   1   2 1694.20   20.04
  -1  -1  -2 1657.83   20.64
  -1  -1  -3   34.42    1.53
   1   1   3   33.89    1.50
   1   1   3   30.15    1.09
  -1  -1  -3   33.22    1.19
  -1  -1  -3   35.76    1.44
  -1  -1  -4  671.19    9.17
   1   1   4  660.16   10.50
  -1  -1  -4  659.31   10.54
  -1  -1  -5    5.96    0.49
   1   1   5    5.48    0.83
  -1  -1  -5    7.53    1.02
   1   1   5    6.36    0.89
   1   1   6  421.16    8.50
   1   1   6  430.35    8.59
  -1  -1  -6  440.28    8.60
   1   1   7  773.69   13.82
  -1  -1  -7  828.96   13.96
  -1  -1  -7  795.94   14.44
  -1  -1  -7  806.90   13.88
  -1  -1  -8   96.08    3.47
  -1  -1  -8   80.66    3.70
  -1  -1  -8   85.68    3.83
  -1  -1  -8   85.90    4.08
   1   1   8   73.90    3.67
  -1  -1  -9  187.78    6.16
   1   1   9  189.92    6.34
  -1  -1  -9  194.74    6.74
  -1  -1  -9  194.46    5.62
  -1  -1  -9  196.53    6.35
  -1  -1 -10  274.08    8.12
   1   1  10  261.15    8.10
  -1  -1 -10  266.65    8.57
  -1  -1 -10  272.96    8.25
  -1  -1 -10  275.66    7.27
   1   1  11  256.97    7.01
  -1  -1 -11  249.50    8.79
   1   1  11  250.39    8.35
  -1  -1 -11  257.69    8.30
  -1  -1 -12   44.75    3.82
  -1  -1 -12   42.98    3.55
   1   1  12   38.60    2.67
  -1  -1 -12   40.41    3.40
   1   1  12   42.16    3.59
   1   1  13  132.35    6.67
  -1  -1 -13  126.90    6.44
  -1  -1 -13  135.22    7.00
  -1  -1 -13  132.73    6.51
   1   1  13  143.25    5.49
  -1  -1 -14  159.14    7.53
   1   1  14  161.83    7.73
  -1  -1 -14  145.07    7.65
  -1  -1 -14  157.17    7.61
   1   1  14  158.91    3.81
   1   1  15   57.98    2.09
  -1  -1 -15   60.89    5.10
   1   1  15   55.88    3.95
   1   1  15   61.86    2.30
   1   1  15   58.10    4.78
   1   1  15   62.49    2.43
  -1  -1 -15   60.38    4.94
  -1  -1 -16  317.73   12.12
   1   1  16  316.51    6.00
   1   1  16  324.32    6.36
   1   1  16  340.21   12.25
  -1  -1 -16  328.40   12.07
  -1  -1 -17  257.40   10.80
  -1  -1 -17  253.21    5.51
   1   1  17  265.06    5.60
   1   1  17  264.65    5.21
  -1  -1 -18    2.92    1.65
   1   1  18    1.74    0.48
  -1  -1 -18    3.84    1.36
  -1  -1 -18    3.14    0.64
   1   1  18    1.70    0.70
  -1  -1 -19  136.76    3.51
   1   1  19  131.27    3.55
  -1  -1 -19  124.15    7.25
   1   1  19  133.52    3.73
   1   1  19  129.53    3.46
   1   1  20  134.87    3.39
   1   1  20  143.32    3.53
  -1  -1 -20  135.59    7.26
   1   1  20  139.19    3.65
  -1  -1 -20  135.87    3.67
  -1  -1 -21   91.35    2.72
   1   1  21   93.48    2.57
   1   1  21   91.02    2.66
   1   1  21   87.34    2.41
   1   1  22    0.31    0.29
   1   1  22    0.33    0.41
   1   1  22    0.51    0.41
  -1  -1 -22   -0.32    0.60
  -1  -1 -22    0.52    0.40
   1   1  23   58.33    1.51
  -1  -1 -23   56.39    1.79
   1   1  23   57.70    1.57
  -1  -1 -23   53.66    1.44
  -1  -2  22   68.45    1.66
  -1  -2  22   60.72    1.48
   1   2 -22   64.48    1.62
   1   2 -22   66.93    1.97
   1   2 -22   66.37    1.88
  -1  -2  22   64.19    1.68
  -1  -2  21   44.16    1.52
  -1  -2  21   44.50    1.61
  -1  -2  21   46.69    1.58
   1   2 -21   46.83    1.82
   1   2 -21   47.75    1.68
   1   2 -20    1.74    0.59
  -1  -2  20    2.87    0.62
  -1  -2  20    2.22    0.52
   1   2 -19   80.73    2.76
   1   2 -19   85.10    2.52
  -1  -2  19   87.25    2.67
  -1  -2  19   81.02    2.61
  -1  -2  19   87.25    2.41
  -1  -2  18  121.97    3.17
  -1  -2  18  128.55    3.46
   1   2 -18  122.78    3.62
   1   2 -18  128.52    3.38
  -1  -2  17   52.87    2.17
  -1  -2  17   51.12    2.16
  -1  -2  17   49.06    1.98
   1   2 -17   52.11    2.15
   1   2 -17   45.59    4.31
  -1  -2  16   17.51    1.20
  -1  -2  16   20.08    1.36
   1   2 -16   16.18    2.69
   1   2 -16   17.84    1.29
  -1  -2  15  154.03    4.02
  -1  -2  15  152.14    3.98
   1   2 -15  151.40    7.89
  -1  -2  15  156.68    8.28
  -1  -2  15  160.71    4.35
  -1  -2  15  141.12    7.12
   1   2 -15  148.07    3.89
   1   2 -15  141.41    7.94
  -1  -2  15  147.66    3.71
   1   2 -15  145.14    7.56
   1   2 -14    0.52    1.34
   1   2 -14    1.61    0.49
  -1  -2  14    2.67    0.62
   1   2 -14    1.63    1.41
  -1  -2  14    2.25    0.60
  -1  -2  14    2.21    0.49
  -1  -2  14    0.65    1.11
   1   2 -14    1.98    1.12
  -1  -2  14    1.59    0.87
  -1  -2  14    1.08    0.57
   1   2 -13   13.36    2.29
  -1  -2  13   14.54    2.46
  -1  -2  13   10.46    1.83
  -1  -2  13   13.77    1.05
   1   2 -13    9.49    1.85
  -1  -2  13   15.73    1.21
  -1  -2  12  263.43    9.00
   1   2 -12  288.34    9.83
  -1  -2  12  273.62    9.90
   1   2 -12  285.99    9.76
  -1  -2  11    2.35    1.33
   1   2 -11    3.52    1.14
   1   2 -11    1.90    1.03
   1   2 -11    1.48    1.05
   1   2 -11    2.80    1.34
  -1  -2  10  117.73    5.56
   1   2 -10  105.68    5.11
   1   2 -10  106.41    5.07
   1   2 -10  103.75    5.15
   1   2 -10  103.34    5.01
  -1  -2   9    2.73    1.33
   1   2  -9    0.70    1.05
   1   2  -9    1.77    1.11
   1   2  -9    1.47    1.03
   1   2  -9    0.95    0.81
  -1  -2   8  998.74   14.73
   1   2  -8  965.91   17.38
   1   2  -8  970.08   17.49
   1   2  -8  950.72   17.06
  -1  -2   8  988.05   17.82
   1   2  -8  987.19   17.39
   1   2  -7    6.42    1.21
   1   2  -7    7.68    1.26
   1   2  -7    6.06    1.09
  -1  -2   7    6.03    0.77
  -1  -2   7    4.77    1.31
   1   2  -7    5.87    1.29
  -1  -2   6  264.68    6.73
   1   2  -6  261.77    6.35
  -1  -2   6  253.86    5.35
   1   2  -6  270.23    6.57
   1   2  -6  257.21    6.54
  -1  -2   5  404.68    8.39
   1   2  -5  381.74    7.98
   1   2  -5  410.93    8.08
  -1  -2   5  383.40    6.96
   1   2  -5  393.69    7.73
  -1  -2   5  393.56    8.13
   1   2  -4  341.31    6.93
  -1  -2   4  340.07    7.02
   1   2  -4  347.80    6.60
  -1  -2   4  349.32    6.23
  -1  -2   3 2717.31   32.12
  -1  -2   3 2663.90   34.30
  -1  -2   2   36.76    1.50
   1   2  -2   39.01    1.63
  -1  -2   2   37.64    1.59
   1   2  -1  706.50   10.10
  -1  -2   1  720.13   10.21
  -1  -2   0 4152.34   50.29
   1   2   0 4115.26   50.46
  -1  -2   0 4165.86   50.82
   1   2   1  278.98    4.41
  -1  -2  -1  287.31    4.69
  -1  -2  -1  275.78    4.01
   1   2   1  278.88    4.34
   1   2   2  447.84    6.66
  -1  -2  -2  450.23    7.07
  -1  -2  -2  445.97    6.61
  -1  -2  -2  444.87    6.39
   1   2   2  430.65    6.54
   1   2   3  411.39    6.70
  -1  -2  -3  435.21    6.79
   1   2   3  421.09    6.77
   1   2   3  404.43    7.13
  -1  -2  -3  444.42    6.21
  -1  -2  -4 2277.11   28.36
  -1  -2  -4 2134.11   29.73
   1   2   4 2209.93   29.27
  -1  -2  -4 2243.64   28.53
   1   2   4 2152.48   29.65
  -1  -2  -4 2253.49   29.38
   1   2   4 2254.76   29.08
   1   2   5   48.50    1.94
  -1  -2  -5   48.34    1.69
  -1  -2  -5   47.43    2.12
  -1  -2  -5   40.68    1.12
  -1  -2  -5   43.00    1.49
  -1  -2  -5   42.98    2.12
   1   2   5   44.94    2.13
  -1  -2  -6  324.40    6.64
  -1  -2  -6  312.14    6.80
  -1  -2  -6  290.28    6.78
   1   2   6  296.45    6.71
   1   2   6  308.80    6.70
   1   2   6  313.33    6.22
  -1  -2  -7   49.09    2.50
  -1  -2  -7   47.61    2.60
   1   2   7   48.49    2.55
  -1  -2  -7   44.23    2.59
   1   2   7   49.17    2.63
   1   2   7   51.78    2.29
  -1  -2  -8   11.34    1.52
   1   2   8   12.13    1.23
   1   2   8    9.26    1.35
  -1  -2  -8    9.80    1.31
  -1  -2  -9  141.77    5.30
   1   2   9  138.79    4.51
  -1  -2  -9  141.08    5.62
  -1  -2  -9  143.02    4.47
   1   2   9  141.76    5.18
  -1  -2  -9  139.10    5.09
  -1  -2 -10    3.01    1.15
  -1  -2 -10    3.22    0.81
   1   2  10    2.83    1.15
  -1  -2 -10    2.07    1.26
  -1  -2 -10    2.44    1.29
   1   2  11   39.67    3.13
  -1  -2 -11   36.63    3.05
  -1  -2 -11   42.83    3.45
  -1  -2 -11   43.82    2.74
  -1  -2 -11   46.37    3.48
   1   2  11   46.10    2.81
  -1  -2 -12  646.26   14.66
  -1  -2 -12  609.02   15.22
   1   2  12  614.91   14.59
   1   2  12  629.50   12.99
  -1  -2 -13    0.63    1.21
   1   2  13    1.44    0.62
  -1  -2 -13    2.89    1.51
  -1  -2 -13    0.63    1.09
   1   2  13    1.48    1.17
  -1  -2 -14  236.04    9.51
   1   2  14  219.70    8.89
  -1  -2 -14  227.49    8.93
  -1  -2 -14  221.79    9.09
   1   2  14  222.96    7.50
  -1  -2 -15   62.83    4.96
  -1  -2 -15   62.40    4.99
   1   2  15   63.46    4.86
   1   2  15   65.01    2.38
  -1  -2 -15   77.80    5.30
   1   2  16   22.00    2.88
  -1  -2 -16   27.91    3.51
   1   2  16   23.74    1.47
  -1  -2 -17   86.17    6.18
   1   2  17   85.52    2.87
  -1  -2 -18   29.31    3.57
   1   2  18   29.83    1.65
   1   2  18   32.50    1.75
  -1  -2 -18   29.85    3.52
   1   2  18   32.45    1.82
   1   2  19   75.21    2.73
  -1  -2 -19   74.11    5.71
   1   2  19   77.49    2.65
   1   2  19   69.35    2.45
  -1  -2 -20    1.86    1.14
   1   2  20    0.41    0.66
  -1  -2 -20    0.51    0.55
   1   2  20   -0.07    0.78
   1   2  20    0.76    0.53
   1   2  20    0.30    0.33
  -1  -2 -20    1.22    0.98
   1   2  21   37.33    1.55
   1   2  21   41.65    1.78
   1   2  21   41.81    1.73
  -1  -2 -21   40.93    1.74
  -1  -2 -22   36.58    1.44
   1   2  22   36.18    1.49
   1   2  22   39.06    1.47
  -1  -2 -22   36.46    1.67
   1   2  22   36.54    1.32
   1   2  23   10.11    0.66
   1   2  23    9.58    0.66
  -1  -2 -23    9.50    0.81
  -1  -3  22    6.43    0.47
   1   3 -22    7.98    0.62
   1   3 -22    7.19    0.60
  -1  -3  21   71.10    1.98
   1   3 -21   73.09    2.07
  -1  -3  21   69.11    1.85
   1   3 -21   74.04    2.23
   1   3 -21   73.34    2.27
  -1  -3  21   71.15    1.87
  -1  -3  20   62.97    2.02
  -1  -3  20   64.51    1.99
  -1  -3  20   63.15    1.80
   1   3 -20   65.59    2.34
   1   3 -20   63.17    1.89
   1   3 -20   61.78    2.16
  -1  -3  19    0.99    0.42
   1   3 -19    1.18    0.64
   1   3 -19    1.25    0.46
  -1  -3  19    1.14    0.49
   1   3 -18   21.56    1.34
   1   3 -18   19.27    2.65
   1   3 -18   19.78    1.49
  -1  -3  18   18.94    1.21
  -1  -3  18   21.20    1.34
  -1  -3  17   25.09    1.44
   1   3 -17   22.22    3.05
  -1  -3  17   22.39    1.41
  -1  -3  17   23.58    1.47
   1   3 -17   23.42    1.60
   1   3 -17   24.16    1.48
   1   3 -16   21.61    3.00
  -1  -3  16   21.02    1.37
   1   3 -16   21.53    1.44
  -1  -3  16   20.99    1.36
  -1  -3  16   21.46    1.42
   1   3 -15    2.33    0.67
  -1  -3  15    3.38    1.25
  -1  -3  15    2.71    0.67
  -1  -3  15    4.69    0.92
   1   3 -15    2.81    1.23
  -1  -3  15    2.16    0.56
  -1  -3  14   14.97    2.33
   1   3 -14   15.68    1.22
  -1  -3  14   19.11    1.33
   1   3 -14   15.00    2.53
  -1  -3  14   18.30    1.31
  -1  -3  14   17.17    1.20
   1   3 -14   15.98    2.48
  -1  -3  14   16.51    2.75
   1   3 -14   18.00    2.87
  -1  -3  14   19.90    1.46
  -1  -3  13   72.51    2.51
   1   3 -13   69.54    2.48
  -1  -3  13   77.32    2.73
   1   3 -13   67.47    4.72
  -1  -3  13   72.60    4.92
   1   3 -13   71.99    5.07
  -1  -3  13   78.88    2.79
  -1  -3  13   74.03    2.61
   1   3 -13   73.07    5.25
  -1  -3  13   75.40    5.45
  -1  -3  13   66.53    2.33
   1   3 -12  116.45    6.15
  -1  -3  12  114.74    6.48
   1   3 -12  118.91    6.37
  -1  -3  11    3.79    1.31
   1   3 -11    5.80    1.58
   1   3 -11    4.55    1.56
  -1  -3  10  109.08    5.54
   1   3 -10   96.56    4.93
   1   3 -10  103.58    5.16
   1   3 -10  102.44    5.34
   1   3 -10  102.03    5.09
  -1  -3   9  358.56    7.67
   1   3  -9  344.46    9.31
  -1  -3   9  364.79   10.11
   1   3  -9  344.99    9.49
   1   3  -9  348.33    9.83
   1   3  -9  367.71    9.76
   1   3  -8   23.05    2.18
   1   3  -8   22.82    2.10
  -1  -3   8   21.91    1.64
  -1  -3   8   21.63    2.33
   1   3  -8   20.74    2.14
   1   3  -8   22.53    2.31
   1   3  -7   60.00    3.26
   1   3  -7   58.05    3.06
  -1  -3   7   59.22    2.66
   1   3  -7   58.13    3.38
  -1  -3   7   58.49    3.39
   1   3  -7   59.90    3.17
   1   3  -6  904.92   15.33
  -1  -3   6  856.41   14.01
   1   3  -6  918.71   15.05
   1   3  -6  847.60   15.37
   1   3  -6  866.55   14.61
  -1  -3   6  894.88   15.48
  -1  -3   5    6.93    0.97
  -1  -3   5    7.50    1.14
   1   3  -5    6.50    0.91
   1   3  -5    5.88    0.95
  -1  -3   5    6.11    0.47
  -1  -3   5    5.27    0.81
   1   3  -5    7.56    0.93
   1   3  -4    0.55    0.40
  -1  -3   4    1.30    0.47
  -1  -3   4    2.22    0.37
  -1  -3   4    1.03    0.60
   1   3  -4    2.06    0.73
   1   3  -3  165.91    3.69
  -1  -3   3  170.88    4.21
  -1  -3   3  163.04    4.25
  -1  -3   2   25.05    1.41
  -1  -3   2   24.62    1.46
   1   3  -2   26.73    1.08
  -1  -3   2   24.94    1.45
   1   3  -2   24.14    1.50
   1   3  -1 1553.32   21.01
  -1  -3   1 1572.31   21.58
  -1  -3   0  982.34   14.08
   1   3   0  999.60   13.30
   1   3   0  978.14   13.67
  -1  -3  -1 1178.97   16.18
  -1  -3  -1 1179.07   14.91
   1   3   1 1187.45   15.88
   1   3   1 1168.14   15.34
  -1  -3  -2 1785.20   23.33
   1   3   2 1777.43   23.34
   1   3   2 1738.20   23.39
   1   3   3   13.80    1.04
  -1  -3  -3   16.41    0.97
   1   3   3   16.83    1.12
   1   3   3   15.59    1.06
  -1  -3  -3   18.27    0.95
   1   3   4 7063.82   82.71
  -1  -3  -4 7165.37   82.23
   1   3   5 1876.85   26.37
  -1  -3  -5 1985.93   25.48
  -1  -3  -5 1874.65   26.14
  -1  -3  -5 1963.00   24.81
   1   3   5 1938.36   26.22
   1   3   5 1859.07   26.50
  -1  -3  -5 1981.35   24.97
   1   3   6   46.51    2.33
   1   3   6   47.31    2.24
   1   3   6   45.67    2.28
  -1  -3  -6   49.01    1.88
   1   3   6   44.53    2.16
  -1  -3  -6   50.94    2.08
  -1  -3  -6   43.79    2.26
  -1  -3  -6   48.83    2.48
  -1  -3  -6   48.09    1.63
   1   3   7  288.36    6.47
  -1  -3  -7  294.62    5.93
   1   3   7  277.59    6.73
   1   3   7  284.52    6.57
  -1  -3  -7  286.12    6.63
  -1  -3  -7  276.78    6.77
  -1  -3  -7  273.46    6.83
  -1  -3  -7  281.39    6.16
  -1  -3  -8  185.54    5.86
  -1  -3  -8  207.90    6.03
   1   3   8  200.83    5.85
   1   3   8  206.80    5.80
   1   3   8  202.29    5.49
  -1  -3  -8  204.34    5.81
   1   3   9   99.67    3.89
  -1  -3  -9   91.11    4.25
  -1  -3  -9   98.56    3.53
  -1  -3  -9   97.30    4.15
  -1  -3 -10  776.12   15.79
   1   3  10  741.75   14.80
   1   3  10  777.52   14.12
  -1  -3 -10  779.83   15.38
  -1  -3 -10  785.34   14.98
  -1  -3 -10  760.32   13.43
   1   3  11  229.47    7.50
  -1  -3 -11  235.85    7.59
   1   3  11  246.19    7.07
  -1  -3 -11  233.97    8.14
  -1  -3 -11  227.43    7.79
   1   3  12  703.39   15.54
  -1  -3 -12  709.99   16.12
   1   3  12  723.81   14.48
  -1  -3 -12  720.60   15.65
  -1  -3 -12  744.31   16.63
   1   3  13   37.38    3.32
   1   3  13   37.86    2.85
  -1  -3 -13   34.72    3.28
  -1  -3 -13   36.38    3.45
   1   3  14    1.68    1.06
   1   3  14    0.74    0.51
  -1  -3 -14   -0.05    1.61
  -1  -3 -14   -0.62    1.34
  -1  -3 -15   36.98    3.86
   1   3  15   32.95    1.67
  -1  -3 -15   32.33    3.44
   1   3  15   28.98    3.20
  -1  -3 -15   30.79    3.56
   1   3  16  192.52    4.51
  -1  -3 -16  178.80    8.79
   1   3  16  182.73    8.37
   1   3  17    8.82    0.97
   1   3  17    8.28    0.91
   1   3  17    8.48    1.03
  -1  -3 -17    5.80    2.07
   1   3  18   28.57    1.65
  -1  -3 -18   28.26    3.75
   1   3  18   28.98    1.73
   1   3  18   25.89    1.52
  -1  -3 -18   34.66    3.87
  -1  -3 -19  111.44    7.04
   1   3  19  115.78    3.33
   1   3  19  116.04    3.46
   1   3  19  119.49    3.16
   1   3  19  110.24    3.20
   1   3  20  210.86    4.27
   1   3  20  205.91    4.71
  -1  -3 -20  215.68    4.69
  -1  -3 -20  196.78    9.09
   1   3  20  210.82    4.62
   1   3  20  196.23    4.38
  -1  -3 -21   22.19    1.25
   1   3  21   19.26    1.12
   1   3  21   23.10    1.32
   1   3  21   21.13    1.04
   1   3  21   21.59    1.32
   1   3  22    2.47    0.55
   1   3  22    2.52    0.54
   1   3  22    1.93    0.39
  -1  -3 -22    2.22    0.67
   1   3  23   37.14    1.28
  -1  -3 -23   35.03    1.42
   1   4 -21    0.56    0.36
   1   4 -21    0.74    0.41
  -1  -4  21    0.04    0.28
  -1  -4  21    0.80    0.33
  -1  -4  21    0.99    0.28
   1   4 -21    0.77    0.44
   1   4 -20   53.34    1.69
  -1  -4  20   52.96    1.62
   1   4 -20   55.12    2.05
   1   4 -20   54.99    1.95
  -1  -4  20   54.07    1.68
   1   4 -20   54.78    2.06
  -1  -4  20   50.42    1.70
   1   4 -19  122.10    3.35
  -1  -4  19  120.37    2.97
  -1  -4  19  122.84    2.98
   1   4 -19  120.69    3.06
   1   4 -19  129.08    3.52
   1   4 -18   14.65    1.28
  -1  -4  18   17.32    1.16
  -1  -4  18   16.27    1.11
   1   4 -18   15.54    1.19
   1   4 -17    2.22    0.67
  -1  -4  17    2.91    0.66
  -1  -4  17    4.31    0.75
  -1  -4  17    1.32    0.54
   1   4 -17    2.37    0.85
   1   4 -16   49.58    2.33
  -1  -4  16   46.97    2.02
  -1  -4  16   48.40    2.09
  -1  -4  16   49.21    2.18
  -1  -4  16   55.43    2.47
   1   4 -16   40.88    3.84
   1   4 -16   49.08    2.17
  -1  -4  15   22.59    1.64
   1   4 -15   20.61    1.44
   1   4 -15   22.03    1.55
  -1  -4  15   19.21    1.33
   1   4 -15   21.86    2.91
  -1  -4  15   21.35    1.48
  -1  -4  14    3.22    0.60
   1   4 -14    0.46    0.85
   1   4 -14    3.62    0.71
  -1  -4  14    2.55    0.70
  -1  -4  14    2.74    0.68
  -1  -4  14    2.89    0.63
  -1  -4  14    2.98    0.93
   1   4 -14   -0.45    1.59
   1   4 -14    4.09    1.31
  -1  -4  13   39.49    2.00
  -1  -4  13   41.00    1.96
  -1  -4  13   45.35    2.14
   1   4 -13   42.68    3.71
   1   4 -13   37.92    3.90
   1   4 -13   38.83    1.89
   1   4 -13   37.58    1.74
  -1  -4  13   39.08    1.80
  -1  -4  13   36.78    3.69
   1   4 -13   35.13    3.82
  -1  -4  13   39.68    4.12
  -1  -4  13   40.27    1.87
   1   4 -12    2.66    1.45
   1   4 -12    2.86    1.51
  -1  -4  12    5.55    1.57
  -1  -4  12    5.94    0.80
  -1  -4  12    4.91    0.74
   1   4 -12    2.53    0.94
  -1  -4  12    3.99    0.63
   1   4 -12    3.12    0.61
   1   4 -11    0.56    0.95
  -1  -4  11    0.88    1.04
   1   4 -11    0.69    1.16
   1   4 -11    0.93    0.72
  -1  -4  10   -0.63    1.32
   1   4 -10    0.84    0.94
   1   4 -10    0.98    1.04
   1   4  -9  243.92    8.36
   1   4  -9  231.37    7.68
  -1  -4   9  241.93    6.64
  -1  -4   9  230.31    8.14
  -1  -4   8   49.11    2.77
   1   4  -8   50.11    3.14
   1   4  -8   39.00    3.20
  -1  -4   8   44.78    3.31
   1   4  -7   69.82    3.90
  -1  -4   7   70.54    3.84
   1   4  -7   68.14    3.48
  -1  -4   7   65.82    3.16
   1   4  -6  745.54   14.08
   1   4  -6  734.11   14.36
  -1  -4   6  729.76   14.23
   1   4  -6  755.04   13.57
  -1  -4   6  707.62   13.20
   1   4  -6  744.62   13.13
  -1  -4   6  752.81   14.24
   1   4  -5   26.94    1.99
  -1  -4   5   27.23    1.36
   1   4  -5   25.46    1.69
   1   4  -5   25.87    1.81
   1   4  -5   26.30    2.21
  -1  -4   5   25.16    2.00
  -1  -4   5   22.35    1.76
  -1  -4   5   29.02    2.14
   1   4  -4  227.66    5.77
  -1  -4   4  220.48    5.66
  -1  -4   4  204.69    5.43
   1   4  -4  208.08    5.14
   1   4  -4  211.28    4.83
   1   4  -4  211.44    5.86
  -1  -4   4  215.51    4.61
  -1  -4   4  212.61    5.86
   1   4  -3  317.45    7.16
  -1  -4   3  316.01    6.87
  -1  -4   3  314.54    6.72
   1   4  -2   29.07    1.60
  -1  -4   2   32.53    1.70
   1   4  -2   31.37    1.92
  -1  -4   2   32.54    1.86
  -1  -4   2   32.94    1.95
   1   4  -1 5030.56   62.89
  -1  -4   1 4979.29   64.02
   1   4   0 2692.92   33.89
  -1  -4   0 2719.60   35.38
   1   4   0 2673.82   34.85
   1   4   1  299.72    5.79
  -1  -4  -1  302.87    6.04
   1   4   1  294.44    4.93
  -1  -4  -2  935.22   13.29
   1   4   2  902.66   11.99
   1   4   2  900.92   13.24
  -1  -4  -2  897.11   13.23
  -1  -4  -3 1759.29   23.74
   1   4   3 1713.88   24.09
   1   4   3 1701.95   23.85
   1   4   4    3.83    0.75
  -1  -4  -4    4.49    0.64
   1   4   4    5.24    0.80
  -1  -4  -4    5.89    0.68
   1   4   4    5.24    0.78
   1   4   5  106.97    3.49
  -1  -4  -5  103.27    3.10
   1   4   5  102.94    3.38
   1   4   5   99.56    3.41
   1   4   6  842.06   13.99
   1   4   6  850.84   13.82
  -1  -4  -6  848.83   13.05
  -1  -4  -6  831.77   12.01
  -1  -4  -6  811.44   12.39
   1   4   6  844.66   13.82
  -1  -4  -6  815.15   13.55
   1   4   6  868.27   13.10
  -1  -4  -7   47.12    2.26
  -1  -4  -7   46.57    2.64
   1   4   7   48.47    2.34
   1   4   7   47.97    2.56
  -1  -4  -7   44.90    2.47
   1   4   7   44.97    2.58
  -1  -4  -7   48.77    1.71
  -1  -4  -7   47.60    2.05
   1   4   7   46.74    2.51
  -1  -4  -8    3.20    0.69
   1   4   8    3.96    0.90
  -1  -4  -8    4.59    0.86
  -1  -4  -8    3.88    1.13
  -1  -4  -8    4.45    1.11
   1   4   8    3.83    1.04
  -1  -4  -8    2.88    0.80
   1   4   9   20.04    1.83
   1   4   9   20.77    1.92
  -1  -4  -9   20.37    2.13
  -1  -4  -9   19.71    2.03
   1   4   9   21.70    2.00
  -1  -4  -9   22.59    1.97
  -1  -4  -9   24.50    1.74
   1   4  10  155.11    5.49
   1   4  10  162.35    5.48
  -1  -4 -10  155.04    5.60
  -1  -4 -10  154.25    5.85
  -1  -4 -11   23.84    2.50
   1   4  11   23.27    2.27
  -1  -4 -11   19.79    2.35
  -1  -4 -11   24.76    2.32
   1   4  11   23.25    2.12
   1   4  12    7.38    1.43
  -1  -4 -12    6.82    1.44
  -1  -4 -12    6.89    1.52
  -1  -4 -12    8.62    1.77
   1   4  12    5.87    1.14
   1   4  13  231.96    7.61
   1   4  13  231.00    8.15
  -1  -4 -13  230.95    8.68
  -1  -4 -13  221.72    8.56
  -1  -4 -13  222.40    8.14
   1   4  14   48.84    3.85
   1   4  14   46.04    1.89
  -1  -4 -14   39.42    3.85
   1   4  14   52.26    3.59
  -1  -4 -14   40.78    3.59
   1   4  14   50.46    2.05
  -1  -4 -14   56.31    4.31
   1   4  15   87.56    2.76
   1   4  15   91.04    2.96
   1   4  15   92.94    5.50
  -1  -4 -15   86.30    5.53
   1   4  15   86.20    2.77
  -1  -4 -15   91.99    5.94
   1   4  16   66.46    2.45
   1   4  16   65.27    2.55
   1   4  16   63.22    2.40
  -1  -4 -16   67.28    5.31
   1   4  16   63.47    4.73
  -1  -4 -16   66.06    5.06
   1   4  17   24.60    1.61
  -1  -4 -17   23.55    3.31
   1   4  17   23.67    1.46
   1   4  17   23.01    1.49
  -1  -4 -17   21.10    3.06
  -1  -4 -18  268.90   11.31
   1   4  18  264.82    5.59
  -1  -4 -18  256.70   10.92
   1   4  18  256.20    5.48
   1   4  18  269.10    5.83
  -1  -4 -19  149.48    8.19
   1   4  19  145.16    3.77
   1   4  19  156.32    4.11
   1   4  19  160.83    3.99
   1   4  19  155.07    3.78
   1   4  20   71.78    2.36
   1   4  20   71.80    2.58
   1   4  20   76.34    2.54
   1   4  20   69.08    2.27
  -1  -4 -20   73.48    5.45
   1   4  21  140.96    3.51
   1   4  21  138.28    3.11
   1   4  21  135.79    3.20
   1   4  21  144.58    3.44
   1   4  22   71.70    2.11
   1   4  22   70.38    2.14
   1   4  22   70.78    1.94
   1   4  22   70.88    1.82
   1   4  23   40.94    1.36
  -1  -4 -23   39.04    1.48
   1   4  24   46.70    1.19
   1   5 -21   52.68    1.50
   1   5 -21   54.81    1.64
  -1  -5  21   52.70    1.42
   1   5 -20   29.22    1.35
  -1  -5  20   28.01    1.15
   1   5 -20   31.57    1.46
  -1  -5  20   29.80    1.14
   1   5 -20   30.01    1.18
  -1  -5  20   29.62    1.05
   1   5 -20   29.69    1.35
   1   5 -19    1.50    0.47
  -1  -5  19    1.16    0.44
   1   5 -19    1.70    0.64
   1   5 -19    1.22    0.57
   1   5 -19    0.35    0.65
  -1  -5  19    1.62    0.42
   1   5 -18   24.02    1.55
  -1  -5  18   24.07    1.36
  -1  -5  18   24.66    1.27
   1   5 -18   24.25    1.62
  -1  -5  18   26.26    1.38
   1   5 -18   23.06    1.37
  -1  -5  17   54.26    2.03
  -1  -5  17   53.04    2.12
  -1  -5  17   54.58    2.20
   1   5 -17   54.12    2.23
   1   5 -17   54.18    2.38
  -1  -5  16    0.93    0.60
  -1  -5  16    0.49    0.58
  -1  -5  16    1.33    0.81
   1   5 -16    1.32    0.72
  -1  -5  16    1.25    0.50
   1   5 -16    1.09    0.81
   1   5 -15    1.29    0.85
  -1  -5  15    3.12    0.74
  -1  -5  15    2.76    0.88
  -1  -5  15    2.43    0.74
   1   5 -15    1.58    0.67
  -1  -5  14    7.99    0.95
   1   5 -14    6.28    0.92
  -1  -5  14    6.18    0.95
   1   5 -14    5.42    0.89
   1   5 -14    8.73    0.88
   1   5 -14    5.17    1.46
  -1  -5  14    6.83    0.94
   1   5 -14    7.84    0.87
  -1  -5  13   14.09    1.14
  -1  -5  13   13.86    1.18
   1   5 -13   15.75    1.14
   1   5 -13   15.59    1.13
   1   5 -13   15.18    1.24
   1   5 -13   11.15    2.25
   1   5 -13   14.06    1.11
  -1  -5  13   10.25    1.99
  -1  -5  13   14.19    1.28
   1   5 -13   16.54    2.35
   1   5 -13   11.99    2.23
  -1  -5  13   14.65    1.22
  -1  -5  13   14.24    1.26
  -1  -5  12    1.68    0.64
   1   5 -12    2.20    0.57
   1   5 -12    1.43    0.48
   1   5 -12    0.37    1.19
   1   5 -12    3.11    1.64
  -1  -5  12    1.30    0.49
   1   5 -12    0.38    0.84
   1   5 -12   -0.04    0.43
  -1  -5  12    1.55    1.17
  -1  -5  12   -0.37    0.96
   1   5 -12    0.74    0.48
  -1  -5  12    1.53    0.59
  -1  -5  12    0.76    0.56
  -1  -5  12    1.34    0.61
  -1  -5  11  132.53    6.99
   1   5 -11  136.13    6.01
   1   5 -11  133.37    7.03
   1   5 -10   18.46    2.31
   1   5 -10   23.01    2.28
   1   5 -10   18.24    2.60
  -1  -5  10   20.38    2.70
   1   5  -9   67.73    4.10
  -1  -5   9   73.04    4.58
   1   5  -9   65.75    4.53
   1   5  -9   71.88    3.79
  -1  -5   9   66.70    3.63
  -1  -5   8   13.86    2.08
   1   5  -8   14.20    2.12
   1   5  -8   13.97    1.81
  -1  -5   8   12.51    1.55
   1   5  -7    4.11    1.45
  -1  -5   7    3.13    0.98
   1   5  -7    3.76    1.03
  -1  -5   7    2.85    1.17
  -1  -5   6   68.30    3.70
  -1  -5   6   62.42    3.37
   1   5  -6   65.91    3.84
  -1  -5   6   64.58    3.56
   1   5  -6   65.19    3.26
  -1  -5   5  373.94    8.76
  -1  -5   5  364.27    8.65
   1   5  -5  376.67    9.28
   1   5  -5  376.32    8.18
  -1  -5   5  390.94    7.44
  -1  -5   5  365.73    8.95
  -1  -5   4   43.49    2.64
  -1  -5   4   42.61    2.62
  -1  -5   4   44.67    2.55
   1   5  -4   46.40    2.85
   1   5  -4   42.82    2.18
  -1  -5   4   49.88    2.31
  -1  -5   4   44.22    2.84
   1   5  -3  445.48    9.46
   1   5  -3  421.68    8.56
  -1  -5   3  451.46   10.27
  -1  -5   3  454.22    9.46
  -1  -5   3  443.03    9.32
  -1  -5   3  464.94   10.02
  -1  -5   3  458.56    8.88
  -1  -5   2  248.74    6.27
  -1  -5   2  258.24    6.58
  -1  -5   2  266.17    7.08
  -1  -5   1   38.36    2.22
   1   5  -1   36.17    1.68
  -1  -5   1   38.33    2.43
  -1  -5   1   34.91    2.24
   1   5   0  346.98    6.01
   1   5   0  331.54    6.99
  -1  -5   0  344.40    7.37
  -1  -5  -1    5.58    0.92
   1   5   1    6.25    0.59
   1   5   1    6.58    0.89
  -1  -5  -2  136.43    2.46
  -1  -5  -2  138.38    4.00
   1   5   2  135.46    3.96
  -1  -5  -2  139.43    3.79
   1   5   2  139.76    2.89
   1   5   3 1017.50   15.66
   1   5   3 1008.91   15.11
  -1  -5  -3 1051.19   15.69
  -1  -5  -3 1015.47   13.66
  -1  -5  -3  999.13   15.35
  -1  -5  -4  176.07    4.84
  -1  -5  -4  182.36    5.34
  -1  -5  -4  158.73    3.73
  -1  -5  -4  164.38    4.23
   1   5   4  170.93    4.42
   1   5   4  170.73    4.72
  -1  -5  -5  313.74    6.27
  -1  -5  -5  314.80    6.30
   1   5   5  329.00    7.27
   1   5   5  315.16    6.86
   1   5   5  329.15    7.29
   1   5   6    0.98    0.66
  -1  -5  -6    0.89    0.52
   1   5   6    0.80    0.59
   1   5   6    2.12    0.91
   1   5   6    1.13    0.42
  -1  -5  -7  531.56   10.36
  -1  -5  -7  555.59   10.12
  -1  -5  -7  546.41    8.82
  -1  -5  -7  568.45    9.34
   1   5   7  544.44    9.71
   1   5   7  551.75   10.90
   1   5   7  549.60   11.06
   1   5   7  547.54   10.55
   1   5   8  215.48    6.08
  -1  -5  -8  207.52    6.11
  -1  -5  -8  225.44    5.26
   1   5   8  213.77    6.46
  -1  -5  -8  205.99    5.78
  -1  -5  -8  213.45    5.72
  -1  -5  -8  211.77    6.29
   1   5   8  216.29    5.61
   1   5   8  221.35    6.33
  -1  -5  -9   47.39    2.70
  -1  -5  -9   43.95    2.66
  -1  -5  -9   44.64    2.85
   1   5   9   44.08    2.55
   1   5   9   48.37    2.91
  -1  -5  -9   43.79    2.90
   1   5   9   45.80    2.81
  -1  -5  -9   49.31    2.39
  -1  -5 -10  171.00    6.15
   1   5  10  162.09    5.74
   1   5  10  167.88    5.55
  -1  -5 -10  177.93    5.16
  -1  -5 -10  166.05    6.01
   1   5  10  168.56    5.87
  -1  -5 -10  173.08    5.86
  -1  -5 -11  235.60    7.91
   1   5  11  252.00    7.61
   1   5  11  253.65    7.45
  -1  -5 -11  240.33    7.50
  -1  -5 -12   15.63    2.16
   1   5  12   16.68    2.00
   1   5  12   16.08    1.91
  -1  -5 -12   15.16    2.17
  -1  -5 -12   14.83    1.97
  -1  -5 -13   20.62    2.44
  -1  -5 -13   22.52    2.67
   1   5  13   24.07    2.39
   1   5  13   23.41    2.47
  -1  -5 -13   23.80    2.74
   1   5  14   33.82    1.61
   1   5  14   40.25    3.37
  -1  -5 -14   31.73    3.47
   1   5  14   34.60    2.98
  -1  -5 -14   28.64    2.94
   1   5  14   33.85    1.68
   1   5  15  275.73    5.34
   1   5  15  284.49    9.34
  -1  -5 -15  265.42    9.84
   1   5  15  279.86    5.60
   1   5  15  276.31    5.82
   1   5  15  273.89    5.74
  -1  -5 -15  278.16   10.61
   1   5  15  275.10    5.58
   1   5  15  279.43    9.58
   1   5  16   11.02    1.03
   1   5  16    9.87    0.97
  -1  -5 -16   10.53    2.19
   1   5  16    9.94    1.04
  -1  -5 -16   10.08    2.21
   1   5  17   41.79    1.96
   1   5  17   41.37    2.07
   1   5  17   41.17    1.92
  -1  -5 -17   40.62    4.34
  -1  -5 -17   37.54    4.19
  -1  -5 -18  138.34    8.08
   1   5  18  126.55    3.53
   1   5  18  135.26    3.61
   1   5  18  138.43    3.69
  -1  -5 -18  135.58    7.77
   1   5  18  137.97    3.87
  -1  -5 -19  129.65    7.56
   1   5  19  136.67    3.62
   1   5  19  127.20    3.45
   1   5  19  133.02    3.74
   1   5  19  136.43    3.52
  -1  -5 -20   31.66    3.65
   1   5  20   31.03    1.67
   1   5  20   29.12    1.45
  -1  -5 -20   26.80    3.38
   1   5  20   27.40    1.42
   1   5  20   29.28    1.58
   1   5  21    2.24    0.49
   1   5  21    1.71    0.45
   1   5  21    2.20    0.64
   1   5  21    1.08    0.58
   1   5  22  134.36    3.00
   1   5  22  126.13    2.72
   1   5  23   82.06    1.98
  -1  -5 -23   78.38    2.06
   1   5  24    1.27    0.26
  -1  -6  20  117.79    2.36
   1   6 -20  105.88    2.35
   1   6 -20  118.61    2.73
  -1  -6  20  106.64    2.25
   1   6 -20  115.66    2.66
   1   6 -19   30.14    1.35
   1   6 -19   27.60    1.33
  -1  -6  19   30.89    1.30
   1   6 -19   29.06    1.48
   1   6 -19   32.79    1.52
   1   6 -18    0.22    0.69
  -1  -6  18    0.75    0.47
  -1  -6  18   -0.20    0.54
   1   6 -18    0.00    0.53
   1   6 -18   -0.43    0.53
   1   6 -18   -0.09    0.70
  -1  -6  18   -0.67    0.37
   1   6 -17   73.31    2.66
  -1  -6  17   74.95    2.55
  -1  -6  17   75.57    2.28
   1   6 -17   77.80    2.77
  -1  -6  17   80.98    2.59
   1   6 -17   81.63    2.86
   1   6 -17   77.55    2.64
  -1  -6  16   59.08    2.39
   1   6 -16   61.07    2.44
  -1  -6  16   62.67    2.59
  -1  -6  16   61.55    2.14
   1   6 -16   63.50    2.60
  -1  -6  16   62.11    2.37
  -1  -6  15   49.02    2.17
  -1  -6  15   52.08    2.32
  -1  -6  15   50.95    2.00
   1   6 -15   50.68    2.29
   1   6 -15   51.14    2.39
   1   6 -15   53.59    2.08
  -1  -6  15   51.20    2.40
  -1  -6  14   15.31    1.43
  -1  -6  14   16.64    1.42
   1   6 -14   14.36    1.34
  -1  -6  14   13.35    1.25
   1   6 -14   16.48    1.39
  -1  -6  14   14.60    1.25
   1   6 -14   15.86    1.16
  -1  -6  13    2.06    0.69
   1   6 -13    1.91    0.53
  -1  -6  13    1.00    0.62
  -1  -6  13    0.96    0.69
   1   6 -13   -0.58    0.94
   1   6 -13    1.26    0.63
  -1  -6  13    0.05    0.73
   1   6 -13    1.45    0.63
  -1  -6  13    1.07    0.58
   1   6 -13    0.87    0.48
   1   6 -12   65.05    2.39
  -1  -6  12   65.06    2.49
   1   6 -12   65.20    2.52
   1   6 -12   58.59    4.87
   1   6 -12   62.79    2.35
  -1  -6  12   64.16    2.58
   1   6 -12   61.81    2.27
  -1  -6  12   62.85    2.55
  -1  -6  12   52.96    4.59
   1   6 -12   65.13    2.56
   1   6 -12   60.48    2.25
  -1  -6  12   60.74    2.31
  -1  -6  12   58.43    2.30
  -1  -6  12   66.33    2.66
   1   6 -11   31.58    3.41
  -1  -6  11   34.69    1.83
   1   6 -11   33.66    1.62
   1   6 -11   35.51    1.72
   1   6 -11   38.64    3.94
   1   6 -11   36.63    1.71
   1   6 -11   34.86    1.64
  -1  -6  11   36.31    1.90
   1   6 -11   36.50    1.81
  -1  -6  11   36.24    1.89
  -1  -6  11   32.97    1.71
   1   6 -11   34.46    1.80
  -1  -6  11   36.30    1.69
   1   6 -10  127.59    6.60
  -1  -6  10  146.12    7.11
   1   6 -10  142.79    7.27
  -1  -6   9  175.58    6.62
   1   6  -9  172.68    7.72
  -1  -6   9  189.52    7.69
   1   6  -9  158.62    7.01
   1   6  -8  112.11    5.85
  -1  -6   8  105.64    5.36
  -1  -6   8  105.95    4.97
  -1  -6   7  123.10    5.43
  -1  -6   7  111.37    5.07
   1   6  -7  119.81    5.73
   1   6  -6  483.16   11.75
  -1  -6   6  441.15   10.77
  -1  -6   6  453.67   10.87
  -1  -6   6  466.30   11.15
  -1  -6   5 1017.78   19.68
  -1  -6   5 1050.86   18.85
  -1  -6   5 1138.85   17.41
  -1  -6   5 1114.12   18.72
   1   6  -5 1115.59   19.73
   1   6  -5 1055.20   18.23
  -1  -6   5 1042.10   18.94
  -1  -6   4  110.34    4.53
   1   6  -4  107.00    4.06
  -1  -6   4  117.02    4.13
  -1  -6   4  112.85    5.06
  -1  -6   4  112.11    4.65
  -1  -6   4  105.76    4.17
  -1  -6   3   69.77    3.54
  -1  -6   3   74.57    3.53
  -1  -6   3   74.96    4.22
  -1  -6   3   74.50    3.94
   1   6  -3   67.51    3.00
  -1  -6   2 1567.76   25.26
  -1  -6   2 1501.12   24.34
  -1  -6   2 1574.93   23.91
   1   6  -2 1535.10   21.93
  -1  -6   1 1506.24   23.26
  -1  -6   1 1564.24   24.67
   1   6  -1 1478.95   21.03
   1   6  -1 1531.25   22.92
  -1  -6   1 1580.96   23.58
  -1  -6   1 1528.84   23.93
  -1  -6   0  450.13    9.42
  -1  -6   0  443.67    9.87
   1   6   0  455.73    9.12
   1   6   0  434.24    7.55
   1   6   1 2065.45   29.07
  -1  -6  -1 2129.99   30.68
  -1  -6  -1 2068.12   29.46
   1   6   1 2069.78   26.66
   1   6   2 3509.42   45.78
  -1  -6  -2 3534.23   47.47
   1   6   2 3517.14   42.92
  -1  -6  -2 3422.37   42.56
  -1  -6  -2 3429.82   45.88
  -1  -6  -3  185.93    5.85
  -1  -6  -3  180.14    5.59
   1   6   3  177.31    5.07
  -1  -6  -3  166.04    4.77
  -1  -6  -3  168.32    3.23
   1   6   3  169.98    4.51
  -1  -6  -3  174.83    4.93
  -1  -6  -4  116.08    3.00
   1   6   4  126.86    3.84
  -1  -6  -4  121.64    3.93
  -1  -6  -4  113.65    4.55
  -1  -6  -4  121.10    4.16
   1   6   4  128.64    4.28
   1   6   5  515.07   10.43
  -1  -6  -5  520.49    8.83
  -1  -6  -5  502.65    9.44
   1   6   5  512.99    9.66
  -1  -6  -5  532.43   11.36
  -1  -6  -5  537.75   10.54
  -1  -6  -6  176.62    5.59
   1   6   6  174.77    5.00
  -1  -6  -6  178.20    6.21
   1   6   6  175.06    4.02
  -1  -6  -6  160.01    4.51
  -1  -6  -6  168.98    4.52
   1   6   6  168.98    5.46
   1   6   6  182.95    5.63
   1   6   7  132.61    4.93
   1   6   7  134.94    5.01
   1   6   7  142.07    3.85
  -1  -6  -7  131.57    4.33
   1   6   7  138.10    4.55
  -1  -6  -8   69.01    3.18
  -1  -6  -8   68.41    3.30
  -1  -6  -8   70.73    3.09
   1   6   8   73.07    2.90
   1   6   8   69.60    3.70
   1   6   8   72.66    3.71
  -1  -6  -8   74.82    2.85
   1   6   8   72.37    3.35
  -1  -6  -8   71.15    3.54
   1   6   9   70.58    3.11
   1   6   9   67.06    3.37
   1   6   9   69.88    3.75
   1   6   9   69.97    3.89
  -1  -6  -9   66.32    3.31
  -1  -6  -9   72.34    2.93
  -1  -6  -9   72.40    3.33
  -1  -6  -9   64.87    3.48
  -1  -6  -9   67.56    3.59
  -1  -6 -10    6.33    1.29
  -1  -6 -10    7.12    1.44
  -1  -6 -10    7.61    1.27
   1   6  10    4.83    1.22
  -1  -6 -10    7.61    1.15
   1   6  10    7.67    1.17
   1   6  10    6.73    1.22
  -1  -6 -11   10.13    1.73
  -1  -6 -11    7.08    1.25
   1   6  11    7.00    1.38
  -1  -6 -11    8.10    1.51
   1   6  11    7.99    1.25
   1   6  12  294.74    8.35
  -1  -6 -12  286.76    8.70
  -1  -6 -12  283.76    9.30
   1   6  12  307.31    9.14
  -1  -6 -13    3.63    1.00
  -1  -6 -13    4.07    1.40
   1   6  13    6.94    1.55
   1   6  14    1.58    0.49
   1   6  14    2.13    0.59
   1   6  14    2.63    0.62
   1   6  14    0.75    0.50
  -1  -6 -14    2.26    1.07
   1   6  14    4.10    0.64
   1   6  14    3.42    1.05
   1   6  14    1.51    0.48
  -1  -6 -14    2.46    1.01
   1   6  15   10.13    1.04
  -1  -6 -15    6.51    1.60
   1   6  15   10.31    0.89
   1   6  15    8.54    0.90
   1   6  15    8.37    1.60
  -1  -6 -15    6.32    1.88
   1   6  15    8.71    0.94
   1   6  15    8.22    0.97
   1   6  15    9.31    0.91
  -1  -6 -16  114.07    6.28
   1   6  16  122.10    3.18
   1   6  16  110.41    3.26
  -1  -6 -16  116.97    7.41
   1   6  16  109.73    3.35
   1   6  16  111.78    3.25
   1   6  16  113.53    3.49
  -1  -6 -16  115.13    6.87
  -1  -6 -17   11.18    2.35
  -1  -6 -17   11.59    2.57
   1   6  17   13.24    1.12
   1   6  17   13.37    1.15
   1   6  17   13.71    0.99
   1   6  17   12.22    1.07
   1   6  17   13.07    1.19
   1   6  18   41.51    2.05
  -1  -6 -18   42.26    4.50
   1   6  18   40.79    1.89
   1   6  18   40.36    1.87
   1   6  18   41.14    1.90
  -1  -6 -18   36.84    4.04
   1   6  19   40.55    1.84
  -1  -6 -19   39.87    4.17
   1   6  19   39.80    1.82
   1   6  19   37.14    1.72
   1   6  19   38.51    1.94
   1   6  20  131.00    3.30
  -1  -6 -20  127.46    7.19
   1   6  20  127.28    3.49
  -1  -6 -20  137.47    7.81
   1   6  20  129.19    3.26
   1   6  20  135.12    3.39
   1   6  21   76.13    2.31
   1   6  21   73.13    2.19
   1   6  22    9.24    0.70
   1   6  22    9.40    0.76
  -1  -6 -22   10.48    0.84
   1   6  23   12.43    0.62
  -1  -6 -23    9.91    0.65
  -1  -6 -23   11.15    0.75
   1   6  23   11.84    0.72
   1   7 -20    7.40    0.57
  -1  -7  20    7.08    0.50
  -1  -7  20    6.51    0.45
   1   7 -20    6.20    0.54
   1   7 -19  115.72    2.66
  -1  -7  19  118.33    2.60
   1   7 -19  115.38    2.80
   1   7 -19  113.70    2.81
   1   7 -18  159.32    3.59
   1   7 -18  159.72    3.76
   1   7 -18  157.42    3.70
  -1  -7  18  154.83    3.45
  -1  -7  18  159.57    3.47
   1   7 -18  151.40    3.41
   1   7 -17   96.00    3.01
  -1  -7  17  102.79    2.88
  -1  -7  17   98.35    2.85
   1   7 -17   99.84    3.12
   1   7 -17   96.57    2.84
   1   7 -17  101.69    2.96
   1   7 -16    2.29    0.92
   1   7 -16    0.12    0.72
   1   7 -16    1.10    0.57
   1   7 -16    0.24    0.86
  -1  -7  16    0.96    0.72
   1   7 -16    0.54    0.39
  -1  -7  16    1.87    0.76
  -1  -7  16    0.64    0.60
  -1  -7  15  164.62    4.11
   1   7 -15  157.20    4.34
  -1  -7  15  156.01    4.31
   1   7 -15  162.23    4.24
  -1  -7  15  153.56    4.15
   1   7 -15  150.84    4.05
   1   7 -15  159.65    3.85
  -1  -7  14   29.72    1.87
  -1  -7  14   30.09    1.90
   1   7 -14   30.69    1.82
   1   7 -14   31.66    1.66
  -1  -7  14   31.04    1.75
   1   7 -14   28.09    1.80
  -1  -7  14   30.40    1.83
  -1  -7  13   11.12    1.12
   1   7 -13   13.29    1.32
   1   7 -13   14.11    1.11
   1   7 -13   13.85    1.15
   1   7 -13   13.27    1.26
   1   7 -13   13.54    1.14
  -1  -7  13   13.01    1.30
  -1  -7  13   13.89    1.31
  -1  -7  13   11.61    1.27
   1   7 -12   42.11    1.95
  -1  -7  12   42.57    2.18
  -1  -7  12   40.48    2.11
  -1  -7  12   41.50    4.16
   1   7 -12   42.71    1.93
   1   7 -12   38.20    3.98
  -1  -7  12   39.01    1.93
   1   7 -12   42.81    1.92
   1   7 -12   40.10    2.04
  -1  -7  12   45.18    2.25
   1   7 -12   38.97    2.06
   1   7 -11    5.55    0.85
   1   7 -11    7.14    0.83
  -1  -7  11    6.68    0.84
   1   7 -11    7.76    0.93
  -1  -7  11    7.89    0.99
  -1  -7  11    6.37    0.95
  -1  -7  11    6.88    0.88
   1   7 -11    6.83    0.83
   1   7 -11    6.91    1.66
   1   7 -11    5.53    0.77
   1   7 -11    6.74    0.83
   1   7 -10   70.46    2.53
  -1  -7  10   72.64    2.69
   1   7 -10   69.45    2.43
   1   7 -10   69.36    2.54
   1   7 -10   60.68    4.63
  -1  -7  10   65.37    2.65
   1   7 -10   69.80    2.47
  -1  -7  10   70.63    2.68
   1   7 -10   71.76    2.51
  -1  -7  10   66.64    2.29
   1   7  -9   48.91    3.90
  -1  -7   9   47.09    3.61
   1   7  -8  135.85    6.25
  -1  -7   8  140.08    6.22
  -1  -7   7   38.44    3.21
   1   7  -7   36.82    3.03
  -1  -7   6   30.46    2.83
  -1  -7   6   33.63    2.76
   1   7  -6   37.70    2.84
  -1  -7   5   36.30    2.82
  -1  -7   5   42.23    3.23
   1   7  -5   42.31    2.83
  -1  -7   5   40.34    3.49
  -1  -7   5   45.33    2.73
  -1  -7   4  685.00   15.47
  -1  -7   4  708.67   14.16
   1   7  -4  661.12   12.89
  -1  -7   4  690.23   14.45
  -1  -7   4  713.26   13.54
  -1  -7   3  491.14   11.57
  -1  -7   3  508.78   12.90
  -1  -7   3  504.84   11.20
   1   7  -3  522.23   10.08
  -1  -7   3  504.78   12.44
   1   7  -2    0.59    0.53
  -1  -7   2   -0.04    1.27
   1   7  -2    1.83    1.12
  -1  -7   2    1.33    1.65
  -1  -7   2    0.77    1.40
  -1  -7   2    1.29    1.26
  -1  -7   1   50.12    3.51
  -1  -7   1   54.13    3.29
  -1  -7   1   56.64    3.91
   1   7  -1   58.71    3.17
   1   7  -1   53.84    2.29
   1   7   0 2964.85   38.08
  -1  -7   0 3027.58   43.52
   1   7   0 2988.36   41.08
  -1  -7   0 3044.71   41.89
  -1  -7   0 2914.80   41.55
  -1  -7   0 2958.38   42.59
   1   7   1 1559.21   20.67
  -1  -7  -1 1617.00   25.97
  -1  -7  -1 1553.30   24.11
  -1  -7  -1 1521.16   25.39
   1   7   1 1546.41   23.69
  -1  -7  -1 1558.22   24.51
   1   7   2   80.46    2.10
  -1  -7  -2   70.78    4.03
   1   7   2   80.28    3.53
  -1  -7  -2   79.44    3.81
  -1  -7  -2   78.26    3.62
  -1  -7  -2   78.12    2.11
   1   7   3  633.87   11.96
  -1  -7  -3  652.42   12.96
  -1  -7  -3  603.89   13.06
  -1  -7  -3  600.54   11.73
   1   7   3  581.47   10.76
  -1  -7  -4  350.20    8.06
   1   7   4  359.09    8.42
  -1  -7  -4  350.47    9.43
   1   7   4  357.74    7.52
  -1  -7  -4  353.97    8.04
  -1  -7  -4  341.99    9.01
  -1  -7  -4  336.83    5.91
   1   7   5   16.52    1.78
  -1  -7  -5   14.78    1.13
  -1  -7  -5   16.66    1.71
  -1  -7  -5   14.03    1.46
   1   7   5   14.44    1.43
  -1  -7  -5   16.51    2.12
   1   7   6 1761.36   25.43
  -1  -7  -6 1691.43   25.10
  -1  -7  -6 1726.31   24.35
  -1  -7  -6 1760.24   28.15
  -1  -7  -6 1752.05   26.80
   1   7   6 1780.41   26.95
   1   7   7    8.50    1.58
  -1  -7  -7    5.57    1.64
  -1  -7  -7    9.23    1.17
  -1  -7  -7    7.23    1.32
   1   7   7    8.36    1.17
   1   7   7    7.89    1.54
   1   7   8 1001.67   17.92
  -1  -7  -8  927.99   18.01
  -1  -7  -8  962.00   19.12
   1   7   8  971.43   18.01
  -1  -7  -8  925.79   16.24
   1   7   8  994.34   16.54
  -1  -7  -9   53.92    3.26
   1   7   9   47.93    3.39
  -1  -7  -9   49.99    2.96
   1   7   9   47.05    2.84
  -1  -7  -9   48.72    2.97
   1   7   9   50.80    3.39
  -1  -7  -9   51.15    3.82
   1   7  10  351.20   10.10
   1   7  10  364.28    8.99
  -1  -7 -10  351.37    9.38
  -1  -7 -10  380.60    9.66
  -1  -7 -10  371.96    9.22
   1   7  10  362.99    9.96
  -1  -7 -11  767.42   15.17
  -1  -7 -11  794.64   15.98
  -1  -7 -11  772.43   16.13
  -1  -7 -11  773.99   15.46
   1   7  11  798.81   16.53
   1   7  12    1.28    0.94
  -1  -7 -12    0.90    0.87
  -1  -7 -12    3.19    0.89
  -1  -7 -13   44.90    3.70
  -1  -7 -13   34.94    3.43
   1   7  13   41.79    3.41
  -1  -7 -13   43.12    3.26
   1   7  14  915.42   13.34
   1   7  14  840.61   13.24
  -1  -7 -14  873.29   20.11
  -1  -7 -14  929.69   21.85
  -1  -7 -14  914.29   18.84
   1   7  14  863.99   13.69
   1   7  14  921.14   13.67
   1   7  14  912.36   13.20
   1   7  14  902.76   13.78
   1   7  14  895.28   13.18
   1   7  14  913.62   19.18
   1   7  15  269.77    5.77
   1   7  15  252.66    9.17
   1   7  15  259.06    5.38
  -1  -7 -15  251.33   10.78
   1   7  15  256.24    5.29
   1   7  15  265.77    5.69
  -1  -7 -15  255.57   10.13
   1   7  15  249.26    5.40
   1   7  15  248.83    5.63
   1   7  15  261.50    5.25
   1   7  16   54.10    2.33
  -1  -7 -16   53.44    4.71
   1   7  16   55.51    2.27
   1   7  16   53.03    2.17
   1   7  16   55.51    2.38
   1   7  16   55.67    2.09
   1   7  16   54.42    2.15
  -1  -7 -16   54.28    5.09
   1   7  17   21.29    1.42
   1   7  17   22.45    1.29
   1   7  17   21.16    1.35
  -1  -7 -17   20.90    3.28
   1   7  17   21.45    1.50
   1   7  17   20.26    1.34
  -1  -7 -17   22.96    3.35
   1   7  17   20.74    1.42
   1   7  18   59.05    2.27
   1   7  18   60.08    2.46
   1   7  18   59.37    2.32
  -1  -7 -18   55.22    4.90
   1   7  18   65.44    2.43
   1   7  18   59.82    2.26
   1   7  18   64.81    2.16
   1   7  19   78.32    2.55
   1   7  19   79.41    2.78
   1   7  19   82.12    2.66
   1   7  19   77.64    2.52
  -1  -7 -19   77.20    5.64
   1   7  20    1.09    0.53
  -1  -7 -20    2.45    1.68
   1   7  20    1.00    0.54
   1   7  21   15.54    1.01
   1   7  21   13.69    0.96
   1   7  22   34.90    1.33
   1   7  22   33.81    1.29
   1   7  23   15.74    0.76
   1   7  23   14.68    0.69
   1   8 -19   45.37    1.49
   1   8 -19   44.32    1.39
  -1  -8  19   46.25    1.36
   1   8 -18    0.70    0.47
   1   8 -18    0.51    0.56
   1   8 -18    0.75    0.46
  -1  -8  18    0.14    0.44
   1   8 -17  100.68    2.89
  -1  -8  17  103.27    2.82
  -1  -8  17  112.37    2.88
   1   8 -17  108.86    3.05
   1   8 -17  104.89    2.92
   1   8 -16   62.65    2.39
  -1  -8  16   61.77    2.31
   1   8 -16   65.58    2.55
   1   8 -16   64.18    2.08
  -1  -8  16   69.66    2.54
  -1  -8  16   66.57    2.40
   1   8 -16   62.67    2.38
   1   8 -15   19.76    1.56
  -1  -8  15   17.08    1.44
  -1  -8  15   16.74    1.34
   1   8 -15   15.61    1.31
  -1  -8  15   16.91    1.34
   1   8 -15   15.74    1.14
   1   8 -15   17.13    1.39
  -1  -8  14  171.23    4.49
   1   8 -14  157.86    4.26
  -1  -8  14  170.06    4.26
  -1  -8  14  168.14    4.43
   1   8 -14  169.75    4.41
   1   8 -14  170.08    4.48
   1   8 -14  171.84    4.05
   1   8 -14  168.42    4.08
   1   8 -13   45.87    2.23
  -1  -8  13   44.26    2.13
  -1  -8  13   44.45    2.29
   1   8 -13   45.73    2.00
   1   8 -13   47.71    2.13
  -1  -8  13   45.06    2.25
   1   8 -13   46.60    2.27
   1   8 -13   45.65    2.03
  -1  -8  13   45.22    2.28
   1   8 -12    2.65    0.69
   1   8 -12    2.83    0.86
  -1  -8  12    2.98    0.86
  -1  -8  12    2.41    0.88
  -1  -8  12    2.78    0.83
   1   8 -12    2.61    0.84
  -1  -8  12    1.69    0.74
   1   8 -12    1.67    0.57
   1   8 -12    2.66    0.63
  -1  -8  11    4.51    0.84
   1   8 -11    2.48    0.71
  -1  -8  11    3.12    0.75
   1   8 -11    1.73    0.59
  -1  -8  11    1.55    0.95
   1   8 -11    2.09    0.54
  -1  -8  11    1.64    0.68
   1   8 -11    2.45    0.61
   1   8 -11    2.62    0.73
  -1  -8  11    3.01    0.81
  -1  -8  10    5.24    0.86
   1   8 -10    5.01    0.78
  -1  -8  10    6.93    0.94
   1   8 -10    5.18    0.81
  -1  -8  10    5.28    0.85
   1   8 -10    4.85    0.73
   1   8 -10    3.83    0.67
   1   8 -10    5.97    1.67
  -1  -8   9    7.37    0.95
  -1  -8   9    4.98    0.91
   1   8  -9    5.93    0.78
  -1  -8   9    5.57    1.54
   1   8  -9    5.03    0.80
  -1  -8   9    6.06    0.86
   1   8  -9    4.95    1.42
   1   8  -9    5.26    0.77
   1   8  -9    9.52    0.92
   1   8  -8   34.72    3.19
  -1  -8   8   32.20    3.19
   1   8  -7   14.23    1.93
  -1  -8   7   10.09    1.81
  -1  -8   6  230.16    8.49
   1   8  -6  248.29    7.84
  -1  -8   6  254.40    8.31
   1   8  -5   11.31    1.49
  -1  -8   5    8.29    1.48
  -1  -8   5    8.02    1.62
  -1  -8   5    7.96    2.06
  -1  -8   4   61.75    3.61
   1   8  -4   60.25    3.21
  -1  -8   4   58.66    3.98
  -1  -8   4   56.91    3.60
  -1  -8   4   58.17    4.34
   1   8  -4   53.49    3.72
   1   8  -3  453.27    9.48
  -1  -8   3  456.99   10.96
  -1  -8   3  437.83   10.70
   1   8  -3  449.51   11.21
  -1  -8   3  440.85   11.43
  -1  -8   3  429.73   12.23
  -1  -8   2  575.07   12.73
   1   8  -2  628.39   11.01
  -1  -8   2  615.87   15.07
  -1  -8   2  585.20   14.27
   1   8  -2  607.04   13.20
  -1  -8   2  604.24   14.67
  -1  -8   2  609.34   13.66
   1   8  -1  196.26    4.77
  -1  -8   1  177.97    7.05
   1   8  -1  171.58    6.15
  -1  -8   1  178.59    7.45
  -1  -8   1  178.91    6.56
  -1  -8   0   19.55    2.55
   1   8   0   15.23    1.90
   1   8   0   22.03    1.34
  -1  -8   0   19.30    2.31
  -1  -8   0   18.92    2.79
  -1  -8   0   20.86    2.19
   1   8   1 1068.02   18.32
  -1  -8  -1 1004.65   18.82
  -1  -8  -1 1043.09   20.59
  -1  -8  -1 1046.49   19.95
  -1  -8  -1 1072.95   18.88
  -1  -8  -2 1279.21   21.59
  -1  -8  -2 1291.74   22.27
   1   8   2 1343.03   21.51
  -1  -8  -2 1259.48   23.09
  -1  -8  -3   81.97    3.93
  -1  -8  -3   76.51    4.17
   1   8   3   85.26    4.00
   1   8   3   89.39    3.48
  -1  -8  -3   77.99    4.54
   1   8   4  385.32    9.36
  -1  -8  -4  383.91   10.23
   1   8   4  365.28    8.12
  -1  -8  -4  374.30   10.46
  -1  -8  -4  382.69    9.12
   1   8   5 1084.03   18.85
  -1  -8  -5 1055.89   18.01
  -1  -8  -5 1078.68   18.15
  -1  -8  -5 1028.92   19.78
  -1  -8  -5 1024.35   18.19
   1   8   5 1085.75   17.21
  -1  -8  -5 1065.73   20.43
   1   8   6  358.76    8.20
   1   8   6  368.51    9.45
  -1  -8  -6  351.83    8.37
  -1  -8  -6  370.09   10.31
  -1  -8  -6  365.22    9.26
   1   8   7    1.41    0.67
  -1  -8  -7    1.04    0.83
   1   8   7    1.18    1.07
  -1  -8  -7    0.63    1.12
  -1  -8  -7    0.35    0.68
  -1  -8  -8  330.60   10.20
   1   8   8  329.19    8.06
  -1  -8  -8  334.26    9.53
   1   8   8  330.29    9.37
  -1  -8  -8  324.49    7.84
  -1  -8  -9  216.02    6.59
  -1  -8  -9  233.45    7.22
   1   8   9  235.71    6.67
  -1  -8  -9  221.40    8.51
  -1  -8  -9  217.66    7.83
  -1  -8  -9  219.51    6.88
   1   8   9  231.41    7.90
   1   8  10   47.73    2.91
  -1  -8 -10   43.40    2.94
   1   8  10   46.46    3.48
  -1  -8 -10   50.84    3.29
   1   8  10   41.35    3.42
  -1  -8 -10   47.73    3.71
  -1  -8 -10   44.23    3.99
  -1  -8 -10   47.17    3.11
  -1  -8 -11   90.87    4.68
  -1  -8 -11   89.75    4.68
   1   8  11   94.58    5.11
  -1  -8 -11   91.55    5.83
  -1  -8 -11   87.65    5.34
  -1  -8 -11   92.41    4.57
  -1  -8 -12  492.77   12.77
  -1  -8 -12  484.31   12.48
  -1  -8 -12  491.06   14.79
   1   8  12  488.50   12.89
  -1  -8 -12  469.90   13.78
   1   8  13    1.45    0.42
   1   8  13    1.47    0.47
   1   8  13    1.13    0.60
   1   8  13    0.58    0.45
  -1  -8 -13    0.41    1.48
   1   8  13    1.41    0.41
   1   8  13    0.83    0.78
  -1  -8 -13   -0.11    0.75
  -1  -8 -13    0.72    1.38
   1   8  13    2.36    0.57
   1   8  13    3.37    0.61
   1   8  13    2.84    0.67
   1   8  14   35.14    1.71
   1   8  14   35.36    1.70
  -1  -8 -14   33.21    3.86
   1   8  14   35.65    3.36
   1   8  14   39.68    1.86
   1   8  14   39.86    1.74
   1   8  14   42.32    1.99
   1   8  14   35.82    1.90
   1   8  14   32.68    1.68
  -1  -8 -14   35.40    3.47
  -1  -8 -14   34.65    4.06
   1   8  14   36.45    1.94
   1   8  15  262.70    5.56
   1   8  15  276.24    6.00
   1   8  15  274.10    5.48
   1   8  15  267.31    5.57
   1   8  15  268.07    5.45
   1   8  15  263.27    5.94
  -1  -8 -15  280.88   11.45
  -1  -8 -15  278.84   10.43
   1   8  15  269.19    5.82
   1   8  15  285.27    5.81
   1   8  16   44.88    2.05
  -1  -8 -16   46.73    4.68
   1   8  16   45.53    2.15
   1   8  16   46.89    1.96
   1   8  16   42.94    2.14
  -1  -8 -16   42.91    4.15
   1   8  16   46.83    1.95
   1   8  16   48.20    2.07
   1   8  16   48.09    2.24
   1   8  16   48.20    2.04
   1   8  17  128.48    3.76
   1   8  17  132.97    3.41
   1   8  17  128.78    3.44
  -1  -8 -17  131.37    7.31
   1   8  17  133.67    3.67
  -1  -8 -17  140.92    8.21
  -1  -8 -18  109.11    6.66
   1   8  18  120.42    3.13
   1   8  18  123.07    3.43
   1   8  18  117.15    3.23
   1   8  18  119.72    3.47
   1   8  19    2.42    0.60
  -1  -8 -19    4.76    1.84
  -1  -8 -19    1.36    1.20
   1   8  19    2.51    0.68
   1   8  19    2.30    0.52
   1   8  19    2.99    0.48
   1   8  20  106.63    2.84
   1   8  20  112.64    2.99
   1   8  21   39.99    1.51
   1   8  21   38.81    1.55
   1   8  22   51.73    1.60
   1   8  22   50.95    1.55
   1   8  22   52.86    1.54
   1   8  23   59.37    1.43
   1   8  23   59.41    1.46
   1   9 -18   47.67    1.60
   1   9 -18   44.77    1.38
  -1  -9  18   49.32    1.50
   1   9 -17   12.05    0.99
   1   9 -17   12.42    0.95
  -1  -9  17   11.49    0.86
   1   9 -17   11.87    0.88
  -1  -9  17   13.86    0.95
   1   9 -16   49.94    1.98
   1   9 -16   48.26    1.68
   1   9 -16   50.25    2.03
  -1  -9  16   48.36    1.90
   1   9 -16   46.63    1.86
  -1  -9  16   52.39    2.05
  -1  -9  16   52.21    1.94
   1   9 -15  132.23    3.65
  -1  -9  15  132.19    3.59
   1   9 -15  124.59    3.42
  -1  -9  15  137.36    3.53
  -1  -9  15  134.72    3.66
   1   9 -15  131.93    3.63
   1   9 -15  130.04    3.27
  -1  -9  14   43.04    2.12
   1   9 -14   43.15    2.12
  -1  -9  14   41.67    1.97
   1   9 -14   41.65    1.80
   1   9 -14   43.74    2.14
  -1  -9  14   41.41    2.06
   1   9 -14   41.09    1.83
   1   9 -14   39.04    1.90
   1   9 -13    4.75    0.77
  -1  -9  13    7.06    1.06
  -1  -9  13    3.86    0.90
  -1  -9  13    3.08    0.86
   1   9 -13    2.41    0.65
  -1  -9  13    3.15    0.82
   1   9 -13    4.43    0.95
   1   9 -13    5.01    0.83
   1   9 -13    4.74    0.95
  -1  -9  12   93.76    3.07
   1   9 -12   93.46    3.00
   1   9 -12   95.71    3.25
   1   9 -12   99.23    3.19
   1   9 -12   95.62    3.23
   1   9 -12   95.82    3.09
   1   9 -12   96.47    3.06
  -1  -9  12   93.69    3.36
  -1  -9  12   96.42    3.30
  -1  -9  12   96.52    3.36
   1   9 -11    0.79    0.69
   1   9 -11    2.94    0.73
  -1  -9  11    1.31    0.71
   1   9 -11    2.33    0.74
   1   9 -11    1.24    0.70
   1   9 -11    1.68    0.55
  -1  -9  11    2.31    0.78
  -1  -9  11    2.73    0.77
  -1  -9  11    2.47    0.76
   1   9 -11    2.49    0.79
  -1  -9  10   30.21    1.85
   1   9 -10   28.34    1.59
  -1  -9  10   27.66    1.63
  -1  -9  10   29.65    1.93
   1   9 -10   30.79    1.76
   1   9 -10   29.31    1.72
   1   9 -10   27.47    1.65
   1   9 -10   24.49    2.72
   1   9 -10   28.54    1.73
  -1  -9  10   31.49    3.61
  -1  -9  10   28.17    1.87
  -1  -9  10   29.63    1.67
   1   9  -9   39.35    1.93
  -1  -9   9   41.00    2.19
   1   9  -9   39.89    1.93
  -1  -9   9   37.82    3.71
   1   9  -9   38.10    3.48
  -1  -9   9   40.21    3.95
   1   9  -9   42.67    1.99
   1   9  -9   40.91    1.96
  -1  -9   9   40.49    2.07
  -1  -9   9   39.92    2.16
  -1  -9   8  188.08    4.92
   1   9  -8  197.57    7.76
  -1  -9   8  177.10    8.13
   1   9  -8  196.05    4.59
  -1  -9   8  185.12    4.94
   1   9  -8  198.40    4.60
   1   9  -8  193.65    4.52
  -1  -9   8  197.43    5.06
   1   9  -8  191.21    4.53
   1   9  -7   -0.68    0.63
   1   9  -7    1.54    0.98
  -1  -9   7    0.05    0.84
  -1  -9   7    2.62    0.84
   1   9  -7    1.57    0.53
   1   9  -7    2.30    1.41
   1   9  -7    2.99    0.56
   1   9  -6   -0.22    1.10
   1   9  -6    0.05    0.65
  -1  -9   6   -0.24    0.68
  -1  -9   5  258.86    9.50
   1   9  -5  278.78    9.61
  -1  -9   5  263.55   10.26
   1   9  -5  283.72    8.06
  -1  -9   5  287.88    8.96
  -1  -9   4  320.44   11.29
  -1  -9   4  339.47   10.75
   1   9  -4  336.19   10.42
  -1  -9   4  352.67    9.86
   1   9  -4  363.05    8.75
  -1  -9   4  364.17   10.16
  -1  -9   3  107.65    5.70
  -1  -9   3  107.95    6.29
  -1  -9   3  126.10    5.45
   1   9  -3  122.79    5.77
  -1  -9   3  115.51    5.50
  -1  -9   2  301.72   10.34
  -1  -9   2  309.81   10.86
   1   9  -2  313.06    9.25
  -1  -9   2  308.55    9.68
  -1  -9   2  292.49   10.49
  -1  -9   2  305.47    8.88
  -1  -9   1  111.36    6.31
  -1  -9   1  109.10    5.45
  -1  -9   1  112.92    6.07
   1   9  -1  107.78    5.12
  -1  -9   0  412.74   11.02
  -1  -9   0  406.17   11.89
  -1  -9   0  424.88   12.44
   1   9   0  428.38   10.66
  -1  -9   0  402.69   10.67
  -1  -9  -1 1059.06   19.84
  -1  -9  -1 1026.60   21.04
   1   9   1 1096.77   19.46
  -1  -9  -1 1065.09   21.80
  -1  -9  -1 1022.17   19.66
  -1  -9  -2    2.35    1.17
  -1  -9  -2    0.33    1.81
   1   9   2    2.07    0.93
  -1  -9  -2    3.33    1.30
  -1  -9  -2    0.35    1.84
   1   9   3   39.19    2.42
  -1  -9  -3   34.20    2.82
   1   9   3   35.22    2.82
  -1  -9  -3   39.26    3.15
  -1  -9  -3   37.07    3.56
  -1  -9  -4  918.24   19.60
   1   9   4  985.97   16.23
  -1  -9  -4  935.56   17.73
  -1  -9  -4  951.08   18.95
   1   9   4  968.26   18.00
   1   9   5  106.40    4.03
   1   9   5   93.12    4.63
  -1  -9  -5   93.51    5.42
  -1  -9  -5   96.91    5.11
  -1  -9  -5   90.55    4.33
  -1  -9  -6   51.32    3.11
  -1  -9  -6   44.67    3.83
  -1  -9  -6   46.43    3.72
  -1  -9  -6   47.01    3.18
   1   9   6   50.60    3.44
   1   9   6   50.80    2.77
   1   9   7   78.56    3.54
  -1  -9  -7   78.31    4.13
   1   9   7   77.83    4.40
  -1  -9  -7   70.52    4.67
  -1  -9  -7   72.74    4.13
  -1  -9  -7   72.02    3.67
  -1  -9  -8  411.83   11.20
   1   9   8  434.55   11.46
  -1  -9  -8  417.40   12.33
   1   9   9  272.01    9.04
  -1  -9  -9  265.34    9.80
  -1  -9  -9  252.43    8.81
  -1  -9  -9  280.11    8.19
  -1  -9  -9  270.60    8.15
  -1  -9 -10   97.70    5.53
   1   9  10   97.26    5.39
  -1  -9 -10   98.66    4.75
  -1  -9 -10  103.78    6.16
  -1  -9 -11   34.01    3.70
  -1  -9 -11   34.06    3.43
   1   9  11   39.38    3.61
  -1  -9 -12  193.30    8.58
   1   9  12  198.35    4.42
   1   9  12  192.89    4.77
   1   9  12  193.25    4.65
  -1  -9 -12  206.72    9.44
   1   9  12  194.60    4.45
   1   9  13  138.39    3.65
  -1  -9 -13  147.71    7.73
   1   9  13  142.59    3.50
   1   9  13  147.40    4.03
   1   9  13  147.46    3.81
  -1  -9 -13  157.95    8.40
   1   9  13  152.09    4.16
  -1  -9 -13  158.38    6.96
   1   9  13  150.16    3.76
   1   9  14  114.53    3.32
  -1  -9 -14  108.72    6.81
  -1  -9 -14  112.89    6.08
   1   9  14  112.83    3.52
  -1  -9 -14  118.22    7.48
   1   9  14  104.04    3.13
   1   9  14  108.38    3.02
   1   9  14  107.17    3.51
   1   9  14  112.02    3.18
   1   9  15   94.93    3.05
   1   9  15   91.89    3.25
  -1  -9 -15   94.15    6.59
  -1  -9 -15  100.75    5.96
   1   9  15   91.64    2.92
   1   9  15   93.55    2.78
   1   9  15   95.85    3.26
   1   9  15   97.44    2.93
  -1  -9 -16   15.01    2.90
   1   9  16    9.81    1.04
   1   9  16    9.94    0.90
   1   9  16   10.10    0.98
   1   9  16   11.14    1.00
  -1  -9 -16   11.62    2.18
   1   9  16   10.93    1.16
   1   9  17   25.69    1.57
   1   9  17   25.07    1.39
  -1  -9 -17   28.39    3.88
  -1  -9 -17   31.47    3.45
  -1  -9 -17   30.29    3.88
   1   9  17   23.68    1.41
   1   9  17   23.70    1.61
   1   9  17   25.22    1.42
   1   9  18  179.92    4.00
  -1  -9 -18  169.13    8.11
   1   9  18  179.51    4.01
  -1  -9 -18  178.40    9.26
   1   9  18  182.19    4.29
   1   9  18  166.28    4.33
   1   9  19    1.30    0.63
   1   9  19    1.89    0.50
   1   9  19    1.41    0.53
   1   9  19    1.70    0.43
   1   9  20   18.15    1.19
   1   9  20   18.06    0.96
   1   9  20   17.37    1.09
   1   9  20   17.67    1.04
   1   9  21   59.63    1.76
   1   9  21   62.16    1.94
   1   9  21   60.56    1.84
   1   9  22  104.78    2.37
   1   9  22  103.49    2.17
   1   9  22  103.43    2.22
   1   9  23    0.97    0.28
   1   9  23    0.24    0.26
  -1 -10  18   33.39    1.01
   1  10 -17   65.34    1.91
  -1 -10  17   65.88    1.81
  -1 -10  17   64.24    1.79
  -1 -10  16    6.10    0.70
   1  10 -16    5.42    0.58
   1  10 -16    6.24    0.77
   1  10 -16    5.46    0.56
   1  10 -16    5.77    0.76
  -1 -10  16    5.50    0.69
   1  10 -15    3.08    0.56
  -1 -10  15    3.61    0.74
   1  10 -15    3.78    0.60
  -1 -10  15    3.75    0.70
   1  10 -15    3.56    0.72
   1  10 -15    3.94    0.79
  -1 -10  15    4.53    0.79
   1  10 -14   27.17    1.44
   1  10 -14   28.67    1.48
  -1 -10  14   28.58    1.66
   1  10 -14   27.43    1.40
   1  10 -14   28.50    1.67
   1  10 -14   28.04    1.60
  -1 -10  14   28.53    1.56
  -1 -10  14   30.18    1.67
  -1 -10  13   10.00    1.14
   1  10 -13   10.68    0.99
   1  10 -13   10.00    1.16
  -1 -10  13   10.04    1.04
   1  10 -13   10.05    0.95
  -1 -10  13    9.94    1.10
  -1 -10  13    9.98    1.12
   1  10 -13   10.39    1.00
   1  10 -13   10.42    1.13
  -1 -10  12    7.03    1.01
  -1 -10  12    5.82    0.84
   1  10 -12    6.67    0.98
   1  10 -12    6.07    0.86
   1  10 -12    6.58    0.96
   1  10 -12    6.48    0.81
   1  10 -12    6.00    0.84
  -1 -10  12    6.63    0.99
  -1 -10  12    5.61    0.89
   1  10 -11    1.24    0.59
  -1 -10  11    1.12    0.79
   1  10 -11    0.26    0.48
  -1 -10  11    1.25    0.88
   1  10 -11    1.53    0.68
  -1 -10  11    1.98    0.75
  -1 -10  11    1.15    0.66
   1  10 -11    2.04    0.75
   1  10 -11    2.04    0.75
  -1 -10  11    1.78    0.70
   1  10 -11    1.38    0.67
  -1 -10  10   40.77    2.13
  -1 -10  10   40.05    2.28
   1  10 -10   42.31    2.07
   1  10 -10   42.18    1.99
   1  10 -10   40.11    2.02
  -1 -10  10   43.03    2.04
   1  10 -10   43.06    2.05
  -1 -10  10   40.38    1.92
  -1 -10  10   40.36    2.22
   1  10 -10   41.31    2.08
   1  10  -9    1.44    0.66
  -1 -10   9    0.59    0.58
   1  10  -9    1.39    0.59
  -1 -10   9    3.31    1.29
  -1 -10   9    3.02    0.91
  -1 -10   9    1.08    0.66
  -1 -10   9    2.30    0.78
   1  10  -9    0.86    0.63
   1  10  -9    1.97    0.63
  -1 -10   8   -0.09    0.83
   1  10  -8    1.13    0.47
   1  10  -8    0.08    0.64
   1  10  -8   -0.19    0.69
  -1 -10   8   -0.98    1.10
   1  10  -8    0.14    0.52
  -1 -10   8    1.48    0.64
  -1 -10   8    0.07    0.65
  -1 -10   8    0.81    0.74
   1  10  -8   -0.17    0.69
   1  10  -8   -0.71    1.30
  -1 -10   8    0.89    0.73
   1  10  -7   94.89    2.96
  -1 -10   7   99.57    3.48
  -1 -10   7   84.69    5.77
  -1 -10   7   93.96    3.43
   1  10  -7   93.43    3.02
   1  10  -7   95.88    3.07
   1  10  -7   97.00    3.09
   1  10  -7   92.24    2.86
  -1 -10   7   93.38    3.42
   1  10  -7  101.24    6.31
   1  10  -7   92.30    2.93
  -1 -10   6   77.09    3.03
   1  10  -6   77.16    2.57
  -1 -10   6   68.32    5.05
   1  10  -6   83.94    5.56
   1  10  -6   72.69    2.50
  -1 -10   6   84.29    3.14
   1  10  -6   82.84    2.73
   1  10  -6   77.47    2.67
   1  10  -6   76.44    2.57
   1  10  -6   76.06    2.62
  -1 -10   5    6.09    2.28
  -1 -10   5    6.13    1.75
   1  10  -5    8.14    1.84
  -1 -10   4   16.86    2.52
  -1 -10   4   18.04    2.92
   1  10  -4   19.17    2.60
  -1 -10   3  329.17   12.08
   1  10  -3  361.74   11.01
  -1 -10   3  353.28   10.88
  -1 -10   3  330.12   11.10
  -1 -10   2   20.71    2.59
  -1 -10   2   23.36    3.66
  -1 -10   2   19.39    2.50
  -1 -10   2   21.66    3.28
   1  10  -2   24.94    2.73
  -1 -10   1   48.42    4.66
  -1 -10   1   51.41    4.56
   1  10  -1   52.94    3.83
  -1 -10   1   48.88    3.47
  -1 -10   1   49.38    3.95
  -1 -10   1   47.18    4.52
  -1 -10   0  291.82   10.93
   1  10   0  303.25    9.27
  -1 -10   0  271.11   10.35
  -1 -10   0  283.98    9.54
  -1 -10  -1  546.14   15.13
  -1 -10  -1  551.85   15.60
  -1 -10  -1  572.96   14.06
   1  10   1  579.89   13.59
  -1 -10  -1  573.13   13.71
  -1 -10  -2   49.25    3.68
  -1 -10  -2   36.96    3.84
  -1 -10  -2   41.22    3.35
   1  10   2   43.79    3.36
  -1 -10  -2   45.26    4.26
  -1 -10  -3    1.53    1.12
   1  10   3    2.55    1.12
  -1 -10  -3    3.16    1.26
   1  10   3    0.74    0.45
  -1 -10  -3    0.20    1.80
  -1 -10  -3    1.09    1.60
  -1 -10  -3   -1.13    2.08
  -1 -10  -4  150.79    6.64
  -1 -10  -4  131.81    6.87
   1  10   4  147.65    5.04
  -1 -10  -4  135.68    5.95
   1  10   4  153.00    6.29
   1  10   5   58.06    3.88
  -1 -10  -5   56.81    4.48
  -1 -10  -5   52.68    3.59
  -1 -10  -5   60.64    4.22
  -1 -10  -6   62.96    4.82
   1  10   6   73.08    4.39
  -1 -10  -6   69.33    3.94
  -1 -10  -6   68.51    4.63
  -1 -10  -7   64.10    4.65
  -1 -10  -7   61.29    4.71
   1  10   7   69.73    4.37
  -1 -10  -7   72.72    3.95
  -1 -10  -8  128.86    7.01
   1  10   8  138.44    6.36
  -1 -10  -8  128.67    5.93
  -1 -10  -8  118.93    6.59
  -1 -10  -9  117.94    6.66
  -1 -10  -9  113.23    5.81
   1  10   9  116.60    6.02
  -1 -10  -9  125.55    5.99
  -1 -10 -10   53.49    4.62
  -1 -10 -10   63.29    4.37
  -1 -10 -10   55.97    4.23
   1  10  10   61.52    4.48
   1  10  11  731.86   17.49
   1  10  11  714.19   11.40
  -1 -10 -11  751.33   17.63
  -1 -10 -11  708.33   17.48
   1  10  11  725.21   11.67
   1  10  11  718.72   11.15
   1  10  11  669.58   10.88
  -1 -10 -11  696.72   18.68
   1  10  11  718.85   11.14
   1  10  12   32.45    1.88
   1  10  12   30.61    1.65
  -1 -10 -12   32.86    3.96
   1  10  12   32.81    1.80
   1  10  12   31.86    1.66
   1  10  12   31.78    1.61
  -1 -10 -12   30.78    3.49
   1  10  13  130.35    3.54
  -1 -10 -13  136.59    7.49
   1  10  13  129.89    3.58
  -1 -10 -13  133.54    7.85
   1  10  13  134.22    3.85
   1  10  13  133.01    3.97
   1  10  13  124.42    3.44
   1  10  14  417.32    7.64
   1  10  14  409.54    7.48
   1  10  14  412.07    7.51
  -1 -10 -14  425.27   14.06
   1  10  14  418.25    8.15
   1  10  14  418.32    8.00
  -1 -10 -14  432.76   14.20
   1  10  15  162.54    4.15
  -1 -10 -15  161.52    8.58
   1  10  15  157.83    4.44
   1  10  15  167.25    3.77
   1  10  15  155.94    3.96
   1  10  15  160.78    4.39
  -1 -10 -15  170.84    8.76
   1  10  15  153.51    3.94
  -1 -10 -16  154.29    8.48
   1  10  16  160.04    3.95
   1  10  16  165.24    4.15
  -1 -10 -16  165.42    8.78
   1  10  16  164.79    3.78
   1  10  16  162.16    4.00
   1  10  16  154.81    4.36
   1  10  17   64.96    2.17
  -1 -10 -17   61.98    5.39
   1  10  17   66.92    2.48
   1  10  17   62.34    2.25
   1  10  17   59.25    2.49
   1  10  18  118.91    3.12
  -1 -10 -18  118.87    7.34
   1  10  18  120.80    3.01
   1  10  18  122.79    3.19
   1  10  18  116.63    3.47
   1  10  18  128.50    3.44
   1  10  19  166.39    3.54
   1  10  19  166.16    3.59
   1  10  19  168.07    3.83
   1  10  19  161.30    3.97
   1  10  19  172.28    3.93
   1  10  20   25.24    1.30
   1  10  20   23.58    1.09
   1  10  20   23.22    1.19
   1  10  20   24.14    1.09
   1  10  20   25.80    1.35
   1  10  21   21.91    0.92
   1  10  21   19.87    0.97
   1  10  21   23.32    1.14
   1  10  22   58.45    1.68
   1  10  22   54.60    1.54
  -1 -11  17   52.70    1.32
   1  11 -16   53.45    1.67
  -1 -11  16   55.58    1.62
   1  11 -16   51.34    1.41
  -1 -11  16   48.93    1.59
   1  11 -15   24.41    1.15
  -1 -11  15   26.10    1.25
  -1 -11  15   23.31    1.24
  -1 -11  15   23.14    1.25
   1  11 -15   24.72    1.26
   1  11 -14    5.72    0.78
  -1 -11  14    6.62    0.84
   1  11 -14    5.38    0.70
  -1 -11  14    6.63    0.89
   1  11 -14    6.27    0.85
  -1 -11  14    6.29    0.77
   1  11 -13   46.11    2.03
   1  11 -13   48.28    1.92
  -1 -11  13   49.38    1.95
  -1 -11  13   49.18    2.18
   1  11 -13   47.80    1.92
  -1 -11  13   46.21    2.02
   1  11 -13   46.85    1.99
   1  11 -12    2.52    0.79
  -1 -11  12    1.38    0.65
   1  11 -12    2.16    0.67
   1  11 -12    1.71    0.56
   1  11 -12    0.69    0.70
  -1 -11  12    2.25    0.71
  -1 -11  12    2.07    0.65
  -1 -11  12    1.70    0.76
   1  11 -11   -0.19    0.64
  -1 -11  11   -0.64    1.01
  -1 -11  11    0.57    0.41
  -1 -11  11   -0.16    0.61
   1  11 -11   -0.68    0.81
  -1 -11  11   -0.85    0.86
   1  11 -11    0.74    0.66
  -1 -11  11    0.11    0.63
   1  11 -11   -0.66    0.77
  -1 -11  10   -0.05    0.78
   1  11 -10    0.02    0.71
   1  11 -10   -0.18    0.71
  -1 -11  10   -0.36    0.77
  -1 -11  10   -0.29    0.59
   1  11 -10   -0.29    0.79
   1  11 -10   -0.72    0.81
  -1 -11  10    0.06    0.87
   1  11 -10    0.55    0.70
  -1 -11  10   -0.18    0.64
  -1 -11   9    1.79    0.64
   1  11  -9    2.09    0.77
   1  11  -9    2.40    0.72
  -1 -11   9    1.83    0.71
   1  11  -9    1.44    0.67
  -1 -11   9    1.07    0.57
  -1 -11   9    1.95    0.87
  -1 -11   9    1.06    0.74
   1  11  -9    1.39    0.69
   1  11  -9    2.00    0.69
   1  11  -8   99.79    3.24
  -1 -11   8   98.16    3.60
  -1 -11   8  105.02    3.70
  -1 -11   8   93.84    3.27
   1  11  -8   99.27    3.02
   1  11  -8   99.45    3.11
   1  11  -8   99.59    3.18
  -1 -11   8   96.55    2.97
   1  11  -8   97.34    3.24
  -1 -11   8   98.05    3.65
   1  11  -7   14.40    1.15
  -1 -11   7   16.54    2.51
  -1 -11   7   16.19    1.50
  -1 -11   7   14.27    2.56
   1  11  -7   14.46    1.24
  -1 -11   7   15.64    1.60
   1  11  -7   15.39    1.21
   1  11  -7   13.92    2.49
   1  11  -7   14.63    1.20
   1  11  -7   15.85    1.32
  -1 -11   7   15.85    1.54
  -1 -11   6  271.47    6.54
   1  11  -6  284.89    5.78
   1  11  -6  280.94   10.84
  -1 -11   6  259.14   10.78
   1  11  -6  286.23    5.93
  -1 -11   6  283.82    6.59
   1  11  -6  278.27    5.79
   1  11  -6  293.81    6.05
   1  11  -6  290.10    6.02
  -1 -11   6  272.94    9.93
   1  11  -6  283.56    5.75
   1  11  -5   12.18    2.36
   1  11  -5   10.51    1.01
   1  11  -5   11.69    1.05
  -1 -11   5   14.10    1.31
   1  11  -5   10.63    0.94
   1  11  -5   11.47    1.07
  -1 -11   5   12.50    2.33
   1  11  -5   10.14    0.96
   1  11  -5   11.69    1.09
  -1 -11   5   11.03    1.25
  -1 -11   5   11.54    1.29
   1  11  -5   11.13    1.05
   1  11  -4   25.34    3.20
  -1 -11   4   25.29    1.67
   1  11  -4   22.88    1.40
   1  11  -4   23.05    1.33
   1  11  -4   23.86    1.40
   1  11  -4   24.41    1.45
  -1 -11   4   25.30    3.21
   1  11  -4   23.84    1.49
   1  11  -4   21.90    1.36
   1  11  -4   23.91    1.51
  -1 -11   4   25.66    1.78
  -1 -11   4   25.01    3.73
  -1 -11   3    3.43    0.99
   1  11  -3    3.68    1.44
  -1 -11   3    1.99    1.12
  -1 -11   3    4.27    2.33
   1  11  -3    4.45    0.64
  -1 -11   2  170.30    7.85
  -1 -11   2  173.40    9.00
  -1 -11   2  170.05    8.07
   1  11  -2  180.29    7.79
   1  11  -1  109.94    5.90
  -1 -11   1  114.00    6.36
  -1 -11   1  102.96    6.87
  -1 -11   1  104.28    6.82
  -1 -11   1  111.32    6.34
  -1 -11   1  108.48    7.25
  -1 -11   0   10.01    2.62
  -1 -11   0   10.05    3.03
   1  11   0   10.22    1.89
  -1 -11   0    6.47    1.62
  -1 -11   0    9.89    2.37
  -1 -11  -1    2.66    2.05
   1  11   1    2.89    1.14
  -1 -11  -1    4.11    1.32
  -1 -11  -1    4.04    2.24
  -1 -11  -2  338.08   12.48
  -1 -11  -2  328.30   10.74
  -1 -11  -2  327.45   11.92
   1  11   2  351.55   10.60
   1  11   3   55.30    3.95
  -1 -11  -3   60.25    4.24
  -1 -11  -3   55.41    4.96
  -1 -11  -3   52.33    4.04
  -1 -11  -3   54.78    4.86
  -1 -11  -4   93.45    6.10
  -1 -11  -4   94.19    5.43
   1  11   4   99.51    5.34
  -1 -11  -4   85.57    5.92
  -1 -11  -4   89.28    6.27
  -1 -11  -4   92.46    5.22
  -1 -11  -5    3.33    1.19
  -1 -11  -5    1.57    0.98
  -1 -11  -5    2.34    1.70
   1  11   6  238.03    8.69
  -1 -11  -6  229.44    9.78
  -1 -11  -6  245.77    8.34
  -1 -11  -6  240.92    9.21
  -1 -11  -7  100.81    6.04
[truncated: 4,839,025 more chars]
